# Supplementary material for: Proteomics Profiling Reveals Carbohydrate Metabolic Enzymes and 14-3-3 Proteins Play Important Roles for Starch Accumulation during Cassava Root Tuberization
Source: PubMed Central journal article supplement (PMC4726164; doi:10.1038/srep19643), 2016-01-21
Supplement: srep19643-s1.pdf [file srep19643-s1.pdf]

## **Supplemental Information**

**Title:** Proteomics Profiling Reveals Carbohydrate Metabolic Enzymes and 14-3-3 Proteins Play Important Roles for Starch Accumulation during Cassava Root Tuberization

**Authors:**

**Xuchu Wang (Corresponding author)**

1. Key Laboratory of Biology and Genetic Resources for Tropical Crops, Institute of Tropical Biosciences and Biotechnology, Chinese Academy of Tropical Agricultural Sciences, Haikou Hainan 571101, China

2. College of Agriculture, Hainan University, Haikou, Hainan 570228, China

E-mail: [xchwanghainan@163.com](mailto:xchwanghainan@163.com)

**Lili Chang**

1. Key Laboratory of Biology and Genetic Resources for Tropical Crops, Institute of Tropical Biosciences and Biotechnology, Chinese Academy of Tropical Agricultural Sciences, Haikou Hainan 571101, China

2. College of Agriculture, Hainan University, Haikou, Hainan 570228, China

**Zheng Tong**

Key Laboratory of Biology and Genetic Resources for Tropical Crops, Institute of Tropical Biosciences and Biotechnology, Chinese Academy of Tropical Agricultural Sciences, Haikou Hainan 571101, China

**Dongyang Wang**

1. Key Laboratory of Biology and Genetic Resources for Tropical Crops, Institute of Tropical Biosciences and Biotechnology, Chinese Academy of Tropical Agricultural

Sciences, Haikou Hainan 571101, China

2. College of Agriculture, Hainan University, Haikou, Hainan 570228, China

**Qi Yin**

1. Key Laboratory of Biology and Genetic Resources for Tropical Crops, Institute of Tropical Biosciences and Biotechnology, Chinese Academy of Tropical Agricultural Sciences, Haikou Hainan 571101, China

2. College of Agriculture, Hainan University, Haikou, Hainan 570228, China

**Dan Wang**

Key Laboratory of Biology and Genetic Resources for Tropical Crops, Institute of Tropical Biosciences and Biotechnology, Chinese Academy of Tropical Agricultural Sciences, Haikou Hainan 571101, China

**Xiang Jin**

Key Laboratory of Biology and Genetic Resources for Tropical Crops, Institute of Tropical Biosciences and Biotechnology, Chinese Academy of Tropical Agricultural Sciences, Haikou Hainan 571101, China

**Qian Yang**

Key Laboratory of Biology and Genetic Resources for Tropical Crops, Institute of Tropical Biosciences and Biotechnology, Chinese Academy of Tropical Agricultural Sciences, Haikou Hainan 571101, China

**Liming Wang**

Key Laboratory of Biology and Genetic Resources for Tropical Crops, Institute of Tropical Biosciences and Biotechnology, Chinese Academy of Tropical Agricultural

Sciences, Haikou Hainan 571101, China

**Yong Sun**

Key Laboratory of Biology and Genetic Resources for Tropical Crops, Institute of Tropical Biosciences and Biotechnology, Chinese Academy of Tropical Agricultural Sciences, Haikou Hainan 571101, China

**Qixing Huang**

Key Laboratory of Biology and Genetic Resources for Tropical Crops, Institute of Tropical Biosciences and Biotechnology, Chinese Academy of Tropical Agricultural Sciences, Haikou Hainan 571101, China

**Anping Guo (Co-corresponding author)**

Key Laboratory of Biology and Genetic Resources for Tropical Crops, Institute of Tropical Biosciences and Biotechnology, Chinese Academy of Tropical Agricultural Sciences, Haikou Hainan 571101, China

E-mail: [xchwanghainanlab@163.com](mailto:xchwanghainanlab@163.com)

**Ming Peng (Co-corresponding author)**

1. Key Laboratory of Biology and Genetic Resources for Tropical Crops, Institute of Tropical Biosciences and Biotechnology, Chinese Academy of Tropical Agricultural Sciences, Haikou Hainan 571101, China

2. College of Agriculture, Hainan University, Haikou, Hainan 570228, China

E-mail: [xchwanghainanlab@163.com](mailto:xchwanghainanlab@163.com)

## **Supplementary Figures and Tables**

**Supplementary Fig. S1.** Yields and 1-DE profiles of total proteins extracted from cassava main roots at different development stages.

**Supplementary Fig. S2.** Typical MS spectra and identification information of proteins from common 2-DE gels.

**Supplementary Fig. S3.** Typical MS spectra and identification of proteins from DIGE gels.

**Supplementary Fig. S4.** Main pathway ways overexpressed in all the differential proteins.

**Supplementary Table S1.** Information for differential protein spots on 2-DE gels and their corresponding MS identities.

**Supplementary Table S2.** Information for differential proteins on 2-D DIGE gels and the corresponding MS identities.

**Supplementary Table S3.** Primers used for RT and Q-PCR analysis.

**Supplemental Figure S1: Yields (A) and 1-DE profiles (B) of total proteins extracted from cassava main roots at different development stages.**

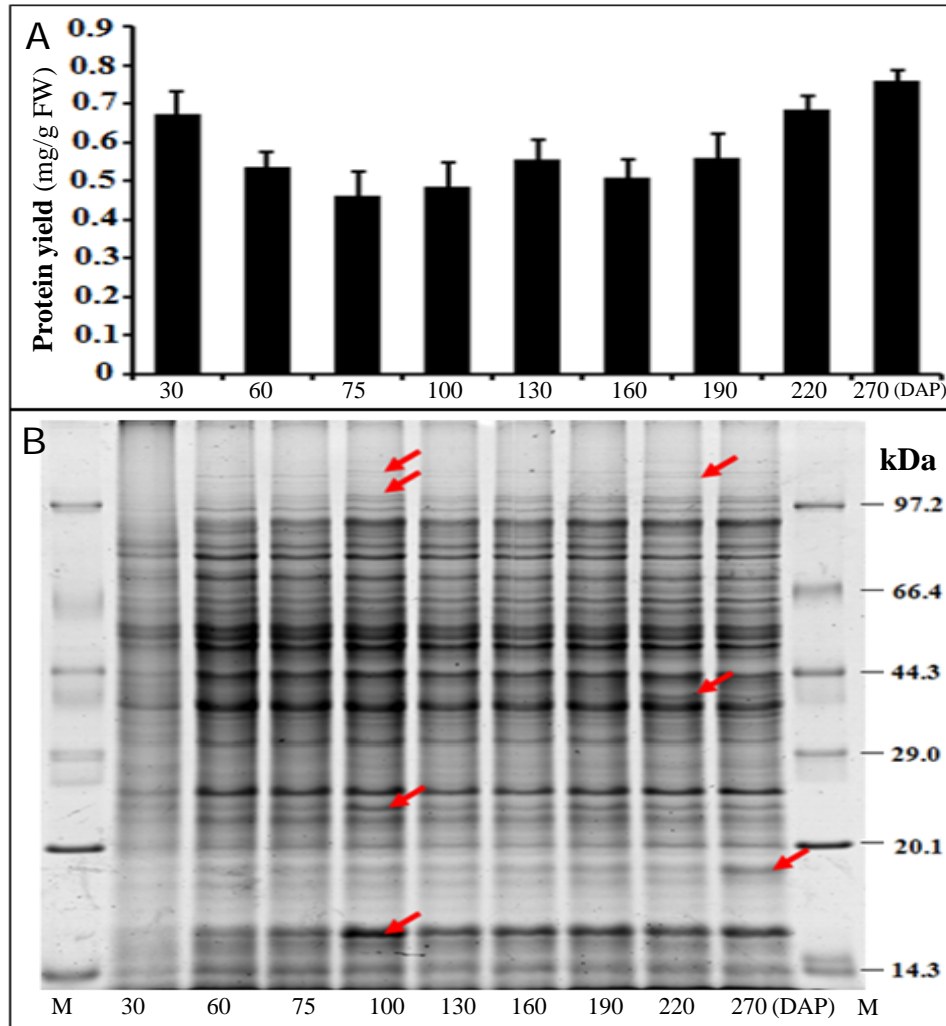

The cassava main roots were collected at 30, 60, 75, 100, 130, 160, 190, 220 and 270 (Stages S1-S9, respectively) days after planting. M, molecular weight markers. Arrows indicated the major differential protein bands on the 1-DE gels.

**Supplemental Figure S2:**  
**Supplemental spectra and MALDI TOF/TOF**  
**MS/MS identification information from common**  
**2-DE gels**

**Annotated spectra for the 118 proteins identified by PMF**  
**and PFF.**

**CID:** collision induced dissociation

**MALDI TOF:**

matrix assisted laser desorption/ionization time of flight

**MS:** mass spectrometry

**PMF:** peptide mass fingerprinting

**PFF:** peptide fragment fingerprinting

Spot No.: 1

NCBI accession No.: **cassava4.1\_006707m|PACid:17966570**

Protein name: **hypothetical protein**

Plant species: ***Manihot esculenta*** Mascot score: **92**

Sequence coverage %: **27** p value: **0.0011**

Matched peptides No.: **13** Total peptides No.: **44**

Calculated Mr: **55987** Calculated *pI*: **9.32**

### Annotated PMF spectra:

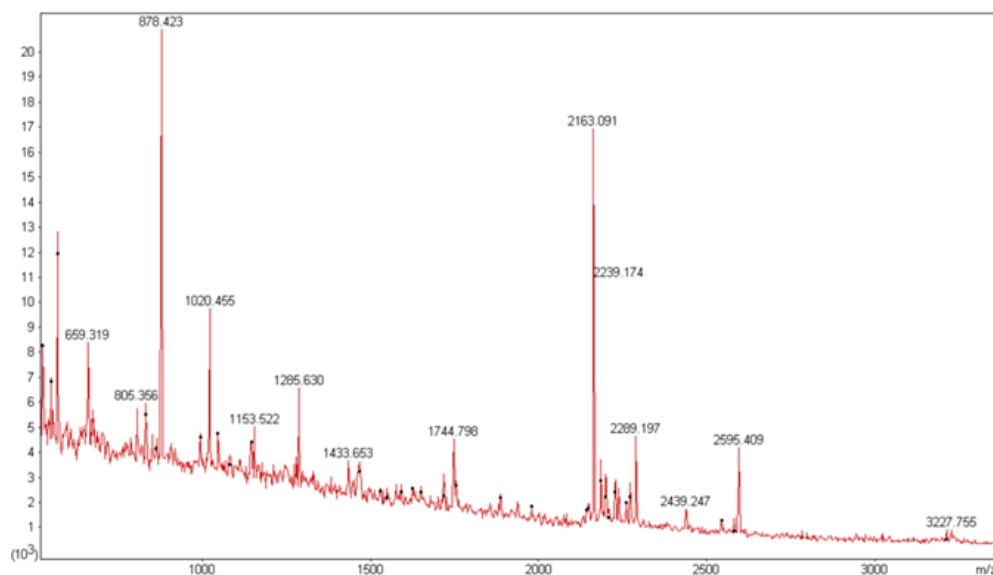

### Probability Based Mowse Score:

Protein score is  $-10 \cdot \log(P)$ , where P is the probability that the observed match is a random event. Protein scores greater than 61 are significant ( $p < 0.05$ ).

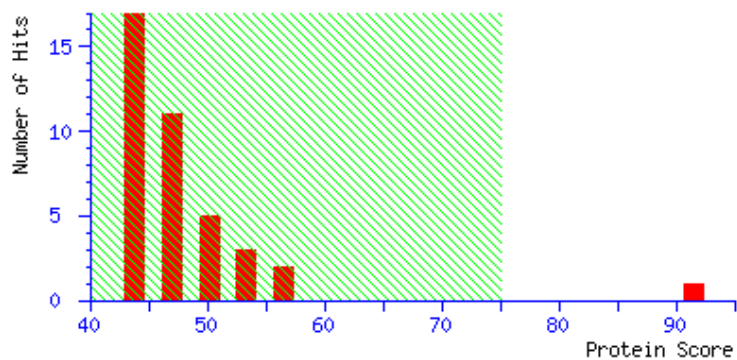

Spot No.: 2

NCBI accession No.: *cassava4.1\_004263m*|PACid:17968763

Protein name: **Chaperonin 60 subunit alpha 1, chloroplastic**

Plant species: *Manihot esculenta*

Mascot score: **215**

Sequence coverage %: **47**

p value: **2.3e-017**

Matched peptides No.: **29**

Total peptides No.: **64**

Calculated Mr: 62302

Calculated pI: **5.34**

### Annotated PMF spectra:

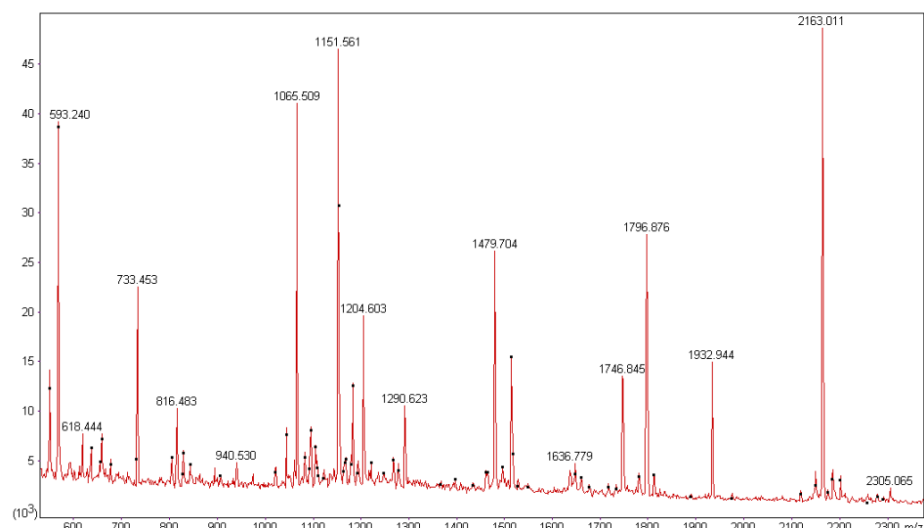

### Probability Based Mowse Score:

Protein score is  $-10 \cdot \log(P)$ , where P is the probability that the observed match is a random event. Protein scores greater than 61 are significant ( $p < 0.05$ ).

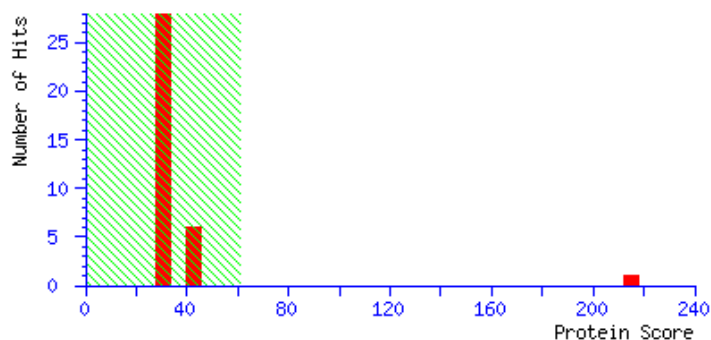



Spot No.: 3

NCBI accession No.: cassava4.1\_006418m|PACid:17966937

Protein name: **V-type proton ATPase subunit B1**

Plant species: *Manihot esculenta* Mascot score: **97**

Sequence coverage %: **46** p value: 1.5e-005

Matched peptides No.: **18** Total peptides No.: **75**

Calculated Mr: **54476** Calculated pI: **4.99**

### Annotated PMF spectra:

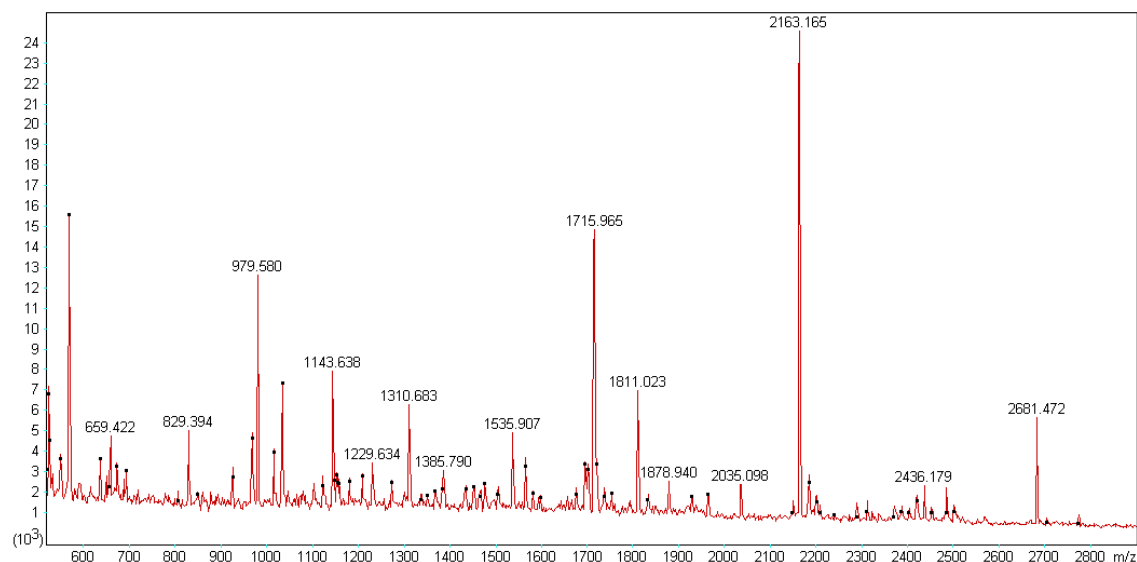

### Probability Based Mowse Score:

Protein score is  $-10 \cdot \log(P)$ , where P is the probability that the observed match is a random event. Protein scores greater than 61 are significant ( $p < 0.05$ ).

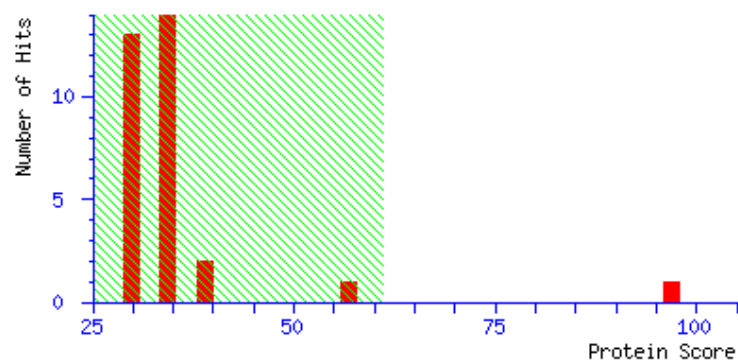

Spot No.: 4

NCBI accession No.: cassava4.1\_006418m|PACid:17966937

Protein name: **V-type proton ATPase subunit B2**

Plant species: ***Manihot esculenta*** Mascot score: **187**

Sequence coverage %: **48** p value: 1.5e-014

Matched peptides No.: **27** Total peptides No.: **77**

Calculated Mr: **54476** Calculated pI: **4.99**

### Annotated PMF spectra:

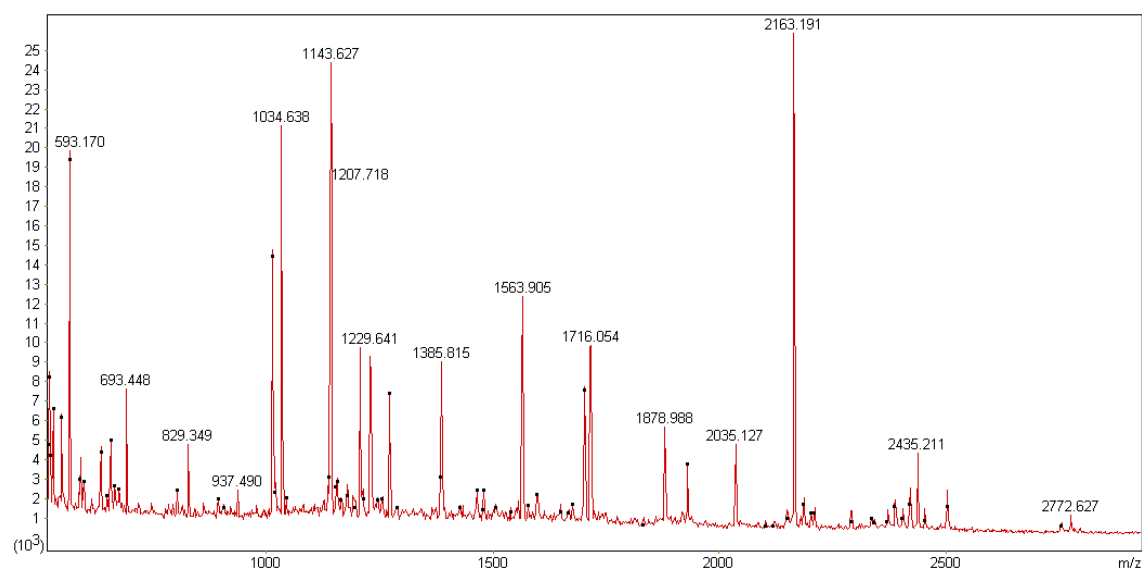

### Probability Based Mowse Score:

Protein score is  $-10 \cdot \log(P)$ , where P is the probability that the observed match is a random event. Protein scores greater than 61 are significant ( $p < 0.05$ ).

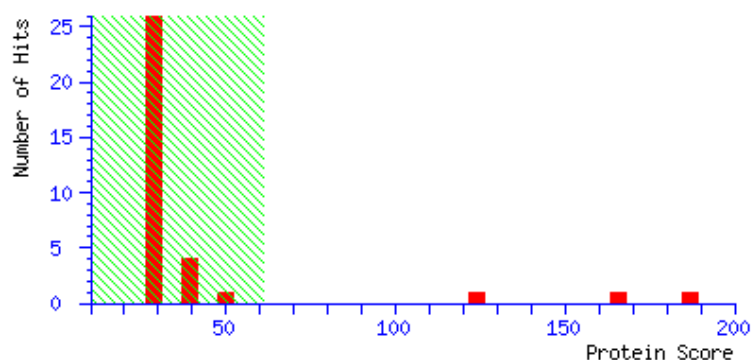

Spot No.: 5

NCBI accession No.: **cassava4.1\_007971m|PACid:17991617**

Protein name: **Tubulin alpha-6 chain**

Plant species: ***Manihot esculenta*** Mascot score: **101**

Sequence coverage %: **51** p value: **5.8e-006**

Matched peptides No.: **15** Total peptides No.: **65**

Calculated Mr: **48294** Calculated *pI*: **4.95**

### Annotated PMF spectra:

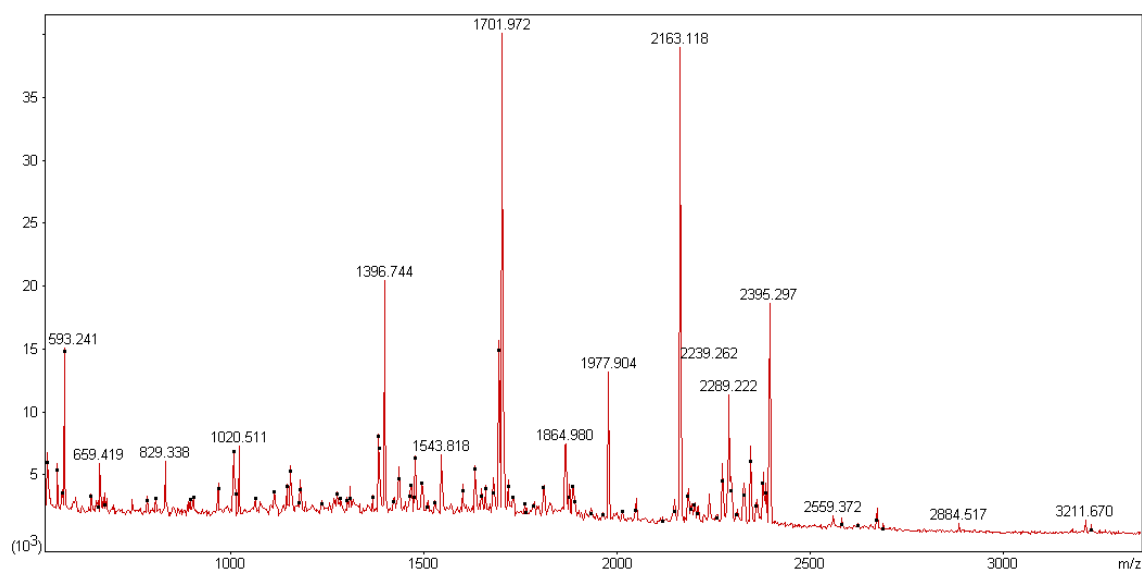

### Probability Based Mowse Score:

Protein score is  $-10 \cdot \log(P)$ , where P is the probability that the observed match is a random event. Protein scores greater than 61 are significant ( $p < 0.05$ ).

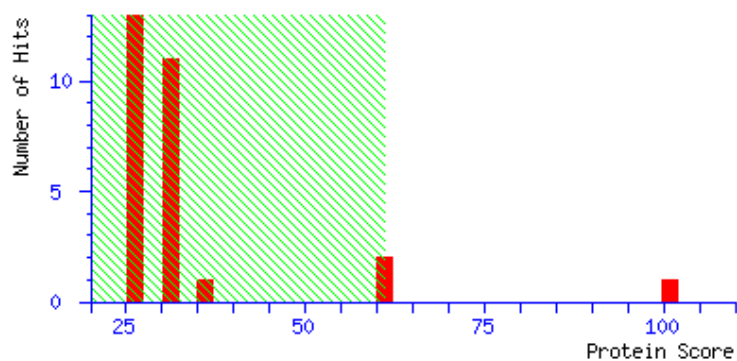

Spot No.: 6

NCBI accession No.: *cassava4.1\_008310m*|PACid:17966609

Protein name: **26S protease regulatory subunit 6A homolog A**

Plant species: *Manihot esculenta* Mascot score: 154

Sequence coverage %: 59 p value: 2.9e-11

Matched peptides No.: 29 Total peptides No.: 93

Calculated Mr: 47700 Calculated pI: 4.99

### Annotated PMF spectra:

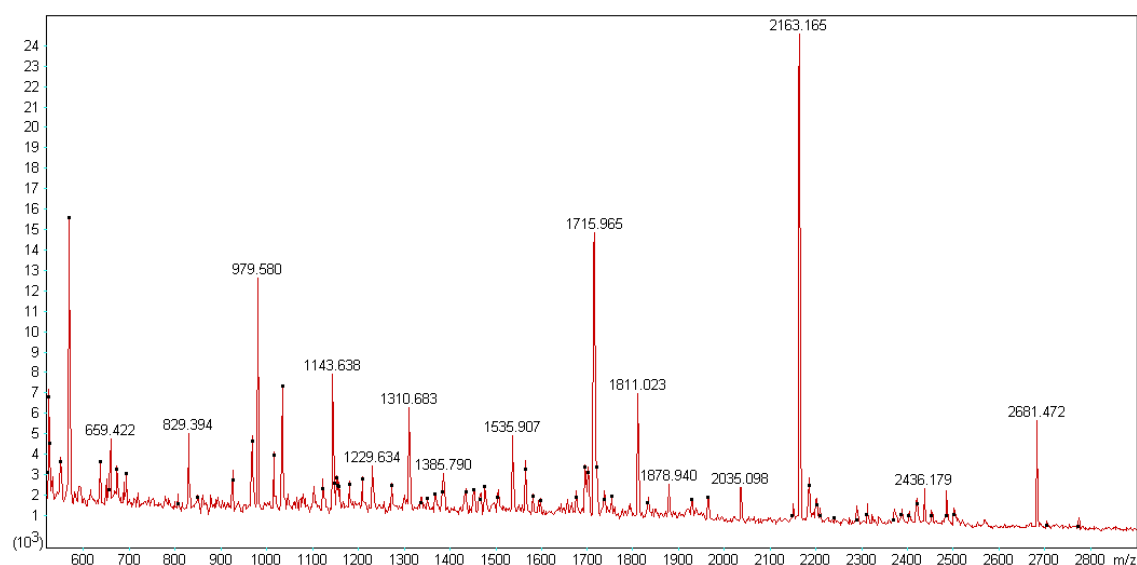

### Probability Based Mowse Score:

Protein score is  $-10 \cdot \log(P)$ , where P is the probability that the observed match is a random event. Protein scores greater than 61 are significant ( $p < 0.05$ ).

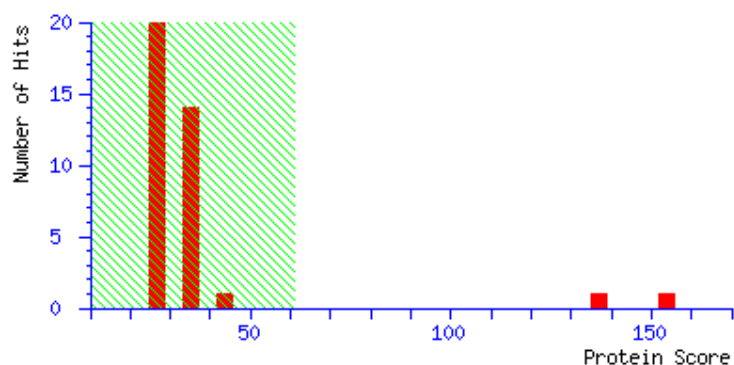

Spot No.: 7

NCBI accession No.: *cassava4.1\_003343m*|PACid:17989500

Protein name: **Probable mediator of RNA polymerase II transcription subunit 37e** Plant species: *Manihot esculenta*

Mascot score: **115**

Sequence coverage %: **32** p value: 2.3e-007

Matched peptides No.: **22** Total peptides No.: **60**

Calculated Mr: 71515 Calculated pI: **5.10**

### Annotated PMF spectra:

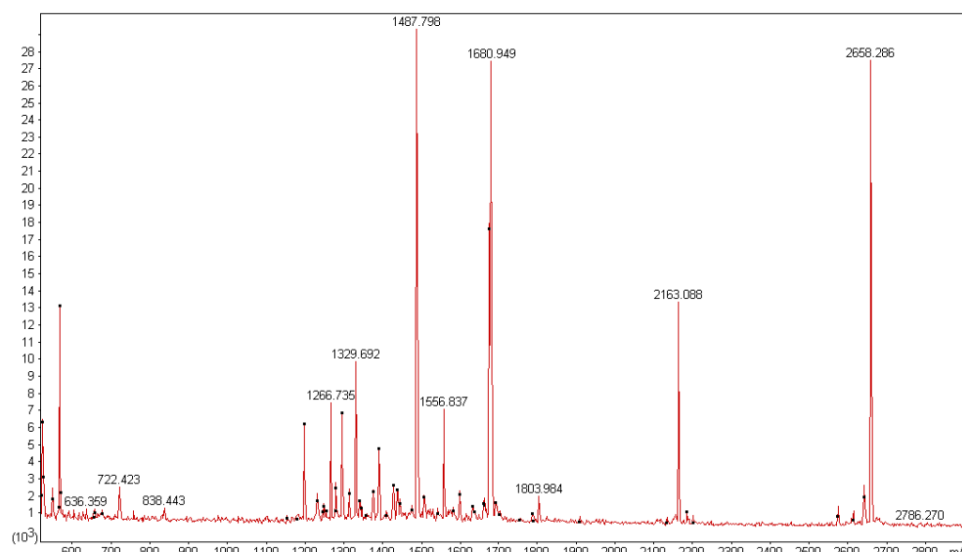

### Probability Based Mowse Score:

Protein score is  $-10 \cdot \log(P)$ , where P is the probability that the observed match is a random event. Protein scores greater than 61 are significant ( $p < 0.05$ ).

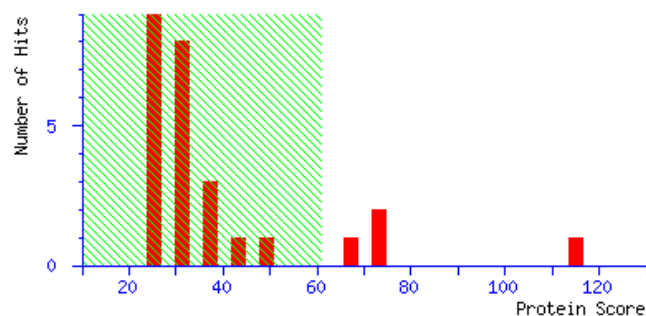

Spot No.: **8**

NCBI accession No.: *cassava4.1\_003331m*|PACid:17988720

Protein name: **Probable mediator of RNA polymerase II transcription subunit 37e**

Plant species: *Manihot esculenta* Mascot score: **98**

Sequence coverage %: **40** p value:  $1.2e-005$

Matched peptides No.: **23** Total peptides No.: **78**

Calculated Mr: 71431 Calculated pI: **5.14**

### Annotated PMF spectra:

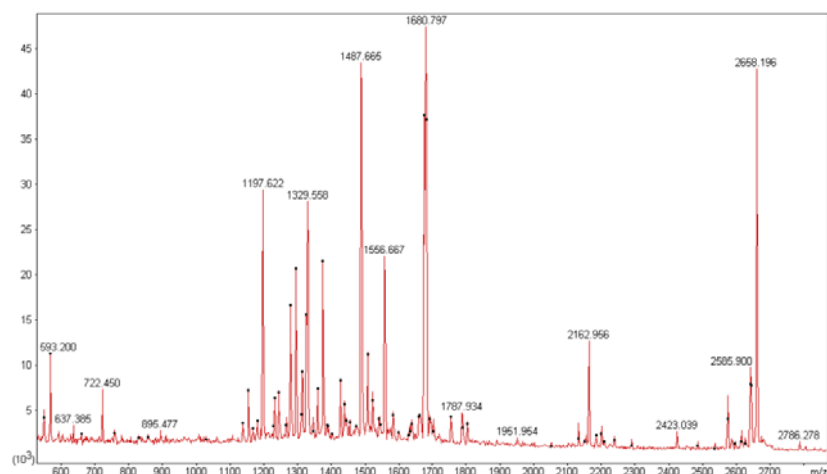

### Probability Based Mowse Score:

Protein score is  $-10 \cdot \log(P)$ , where P is the probability that the observed match is a random event. Protein scores greater than 61 are significant ( $p < 0.05$ ).

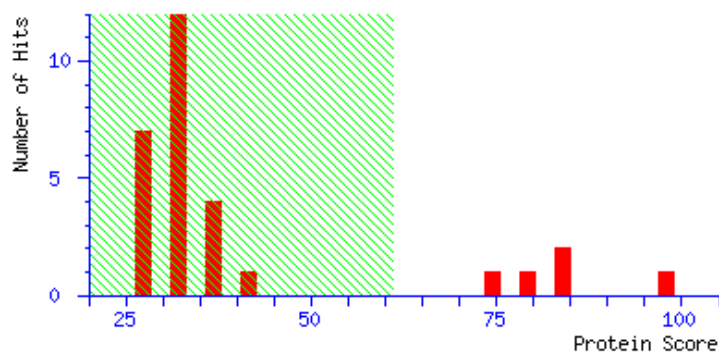

Spot No.: 9

NCBI accession No.: *cassava4.1\_003340m*|PACid:17988693

Protein name: **Probable mediator of RNA polymerase II transcription subunit 37c**

Plant species: *Manihot esculenta* Mascot score: **128**

Sequence coverage %: **40** p value:  $1.2e-008$

Matched peptides No.: **29** Total peptides No.: **74**

Calculated Mr: **71461** Calculated pI: **5.17**

### Annotated PMF spectra:

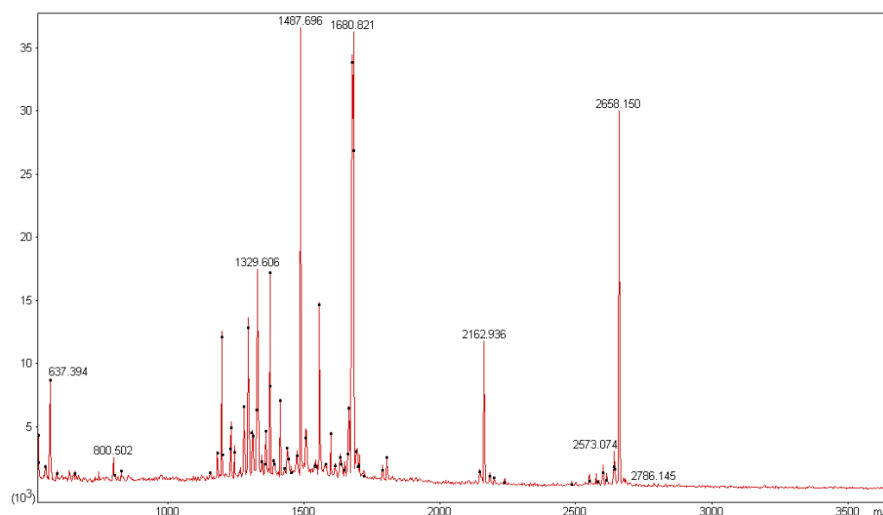

### Probability Based Mowse Score:

Protein score is  $-10 \cdot \log(P)$ , where P is the probability that the observed match is a random event. Protein scores greater than 61 are significant ( $p < 0.05$ ).

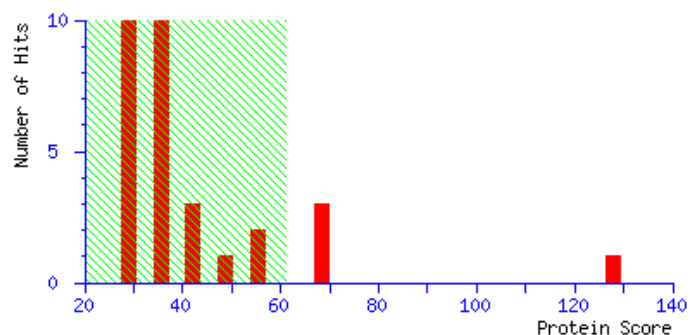

Spot No.: **10**

NCBI accession No.: **cassava4.1\_033108m|PACid:17973616**

Protein name: **Actin-7** Plant species: ***Manihot esculenta***

Mascot score: **127**

Sequence coverage %: **48** p value: **1.5e-008**

Matched peptides No.: **15** Total peptides No.: **62**

Calculated Mr: **41897** Calculated pI: **5.31**

### Annotated PMF spectra:

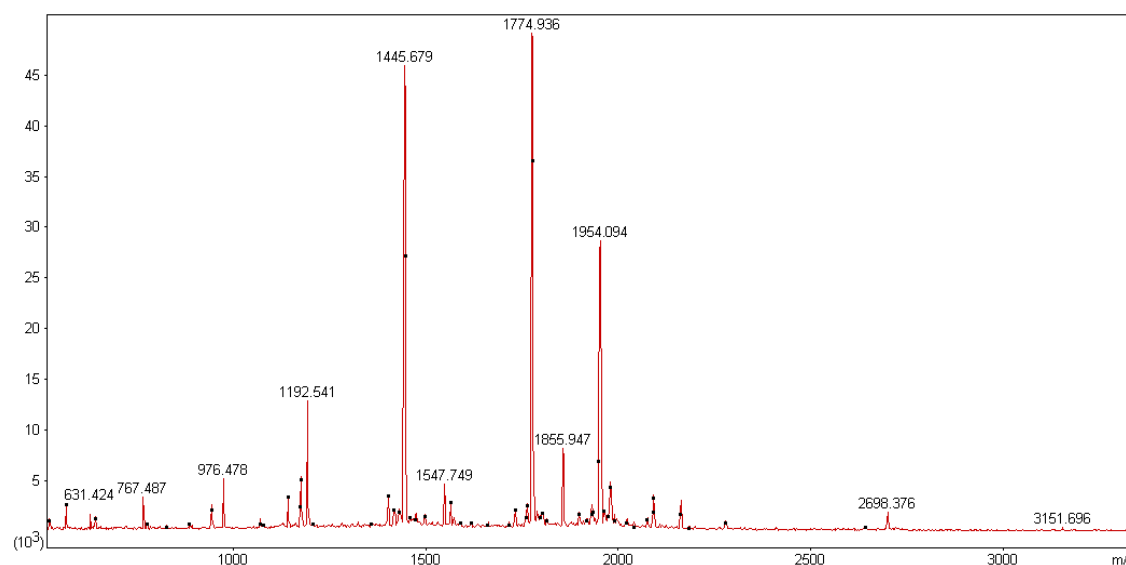

### Probability Based Mowse Score:

Protein score is  $-10 \cdot \log(P)$ , where P is the probability that the observed match is a random event. Protein scores greater than 61 are significant ( $p < 0.05$ ).

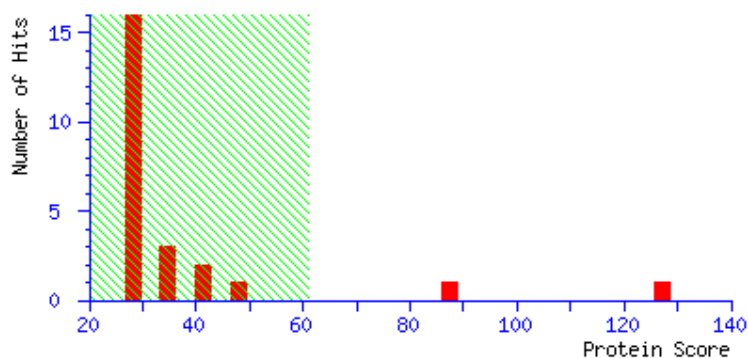



Spot No.: 11

NCBI accession No.: *cassava4.1\_003907m*|PACid:17972056

Protein name: **Chaperonin 60 subunit beta 2, chloroplastic** Plant

species: *Manihot esculenta* Mascot score: 147

Sequence coverage %: 46 p value: 1.5e-010

Matched peptides No.: 23 Total peptides No.: 63

Calculated Mr: 64742 Calculated pI: 5.62

### Annotated PMF spectra:

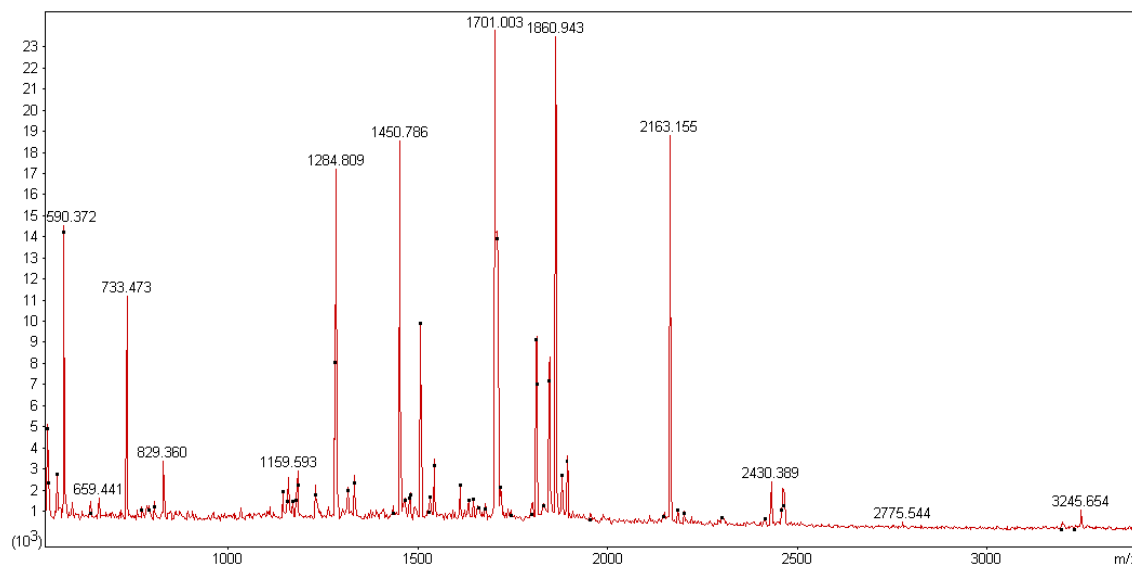

### Probability Based Mowse Score:

Protein score is  $-10 \cdot \log(P)$ , where P is the probability that the observed match is a random event. Protein scores greater than 61 are significant ( $p < 0.05$ ).

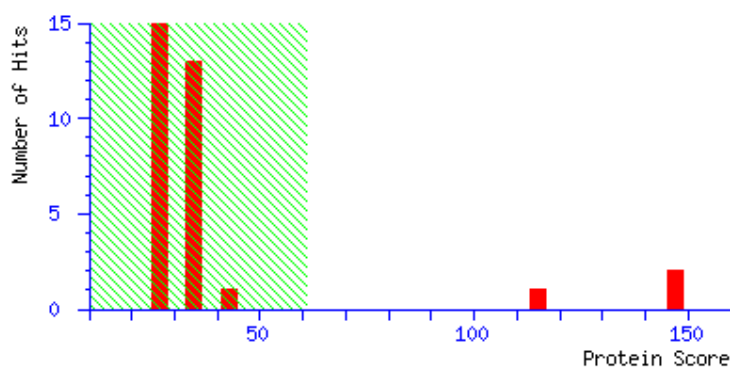

Spot No.: **12**

NCBI accession No.: *cassava4.1\_003883m*|PACid:17972412

Protein name: **Chaperonin 60 subunit beta 1, chloroplastic**

Plant species: *Manihot esculenta* Mascot score: **73**

Sequence coverage %: **31** p value: 0.0035

Matched peptides No.: **15** Total peptides No.: **57**

Calculated Mr: **64920** Calculated pI: **5.68**

### Annotated PMF spectra:

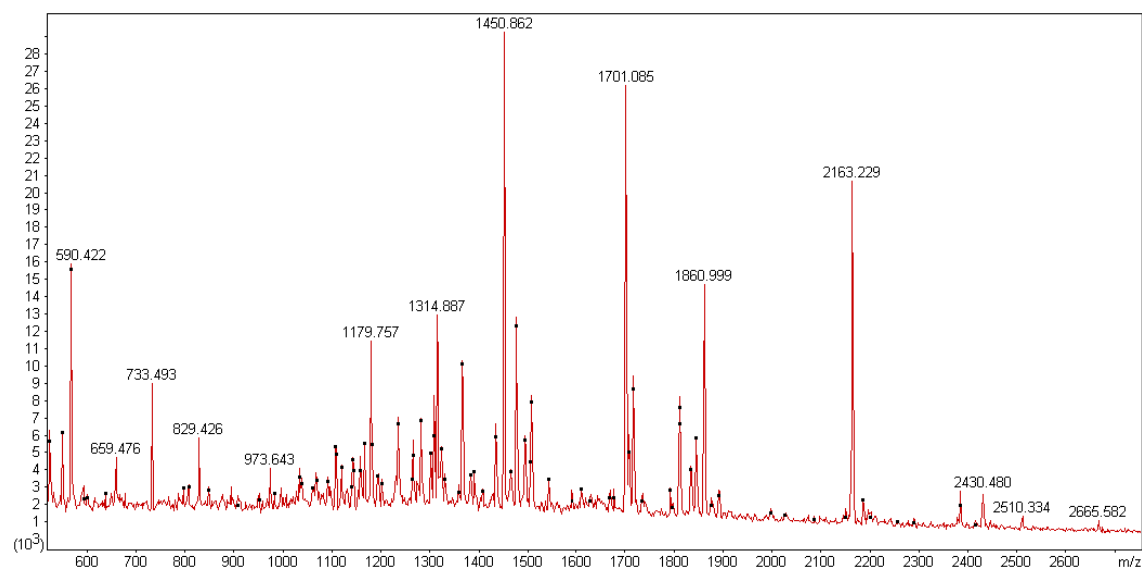

### Probability Based Mowse Score:

Protein score is  $-10 \cdot \log(P)$ , where P is the probability that the observed match is a random event. Protein scores greater than 61 are significant ( $p < 0.05$ ).

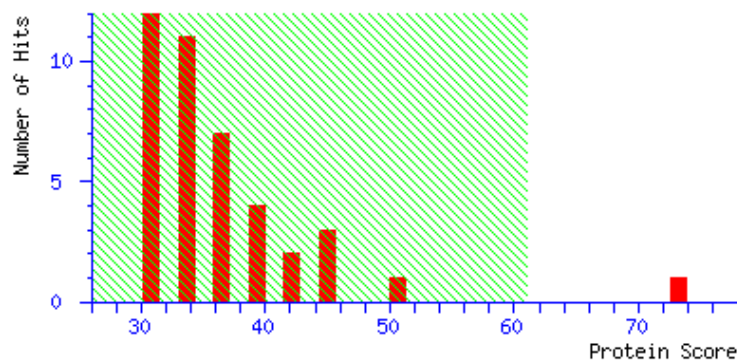

Spot No.: **13**

NCBI accession No.: *cassava4.1\_004458m*|PACid:17962184

Protein name: **Chaperonin CPN60, mitochondrial**

Plant species: *Manihot esculenta* Mascot score: **143**

Sequence coverage %: **49** p value: 3.7e-010

Matched peptides No.: **28** Total peptides No.: **73**

Calculated Mr: **61582** Calculated pI: **5.71**

### Annotated PMF spectra:

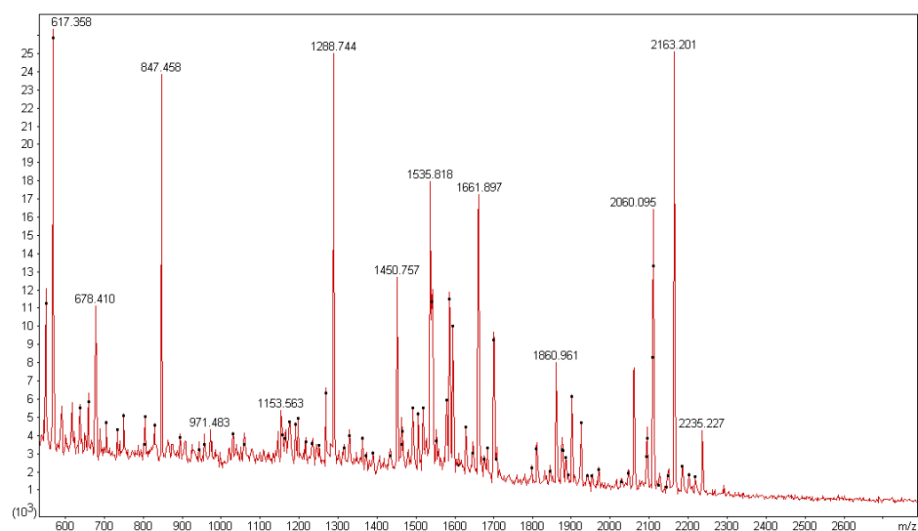

### Probability Based Mowse Score:

Protein score is  $-10 \cdot \log(P)$ , where P is the probability that the observed match is a random event. Protein scores greater than 61 are significant ( $p < 0.05$ ).

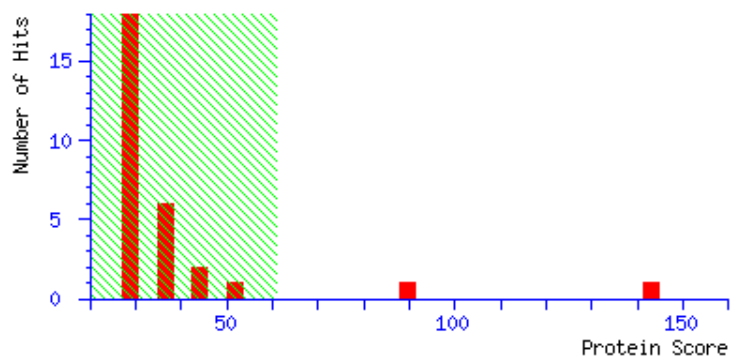

Spot No.: 14

NCBI accession No.: *cassava4.1\_007513m*|PACid:17961628

Protein name: **Tubulin alpha-6 chain** Plant species: *Manihot*

*esculenta* Mascot score: **87**

Sequence coverage %: **40** p value: 0.00014

Matched peptides No.: **19** Total peptides No.: **80**

Calculated Mr: **50342** Calculated pI: **4.90**

### Annotated PMF spectra:

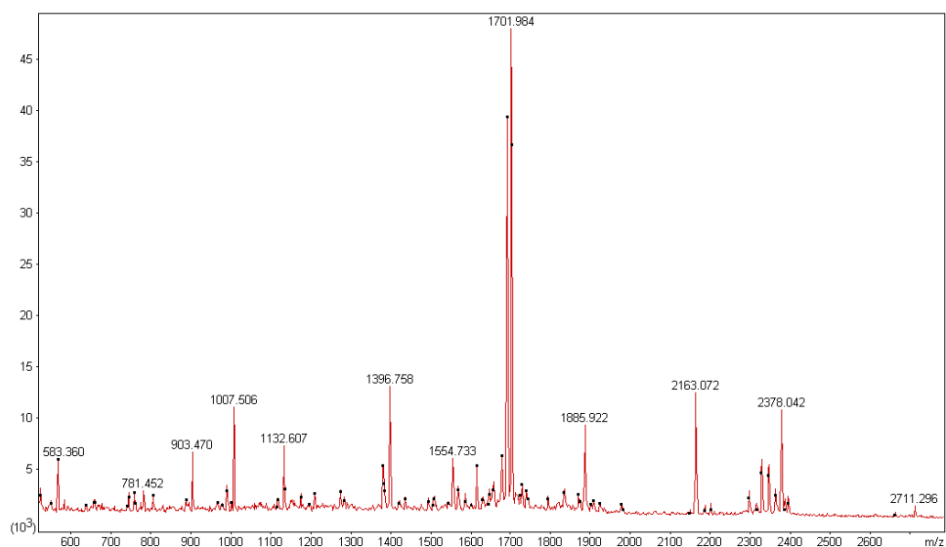

### Probability Based Mowse Score:

Protein score is  $-10 \cdot \log(P)$ , where P is the probability that the observed match is a random event. Protein scores greater than 61 are significant ( $p < 0.05$ ).

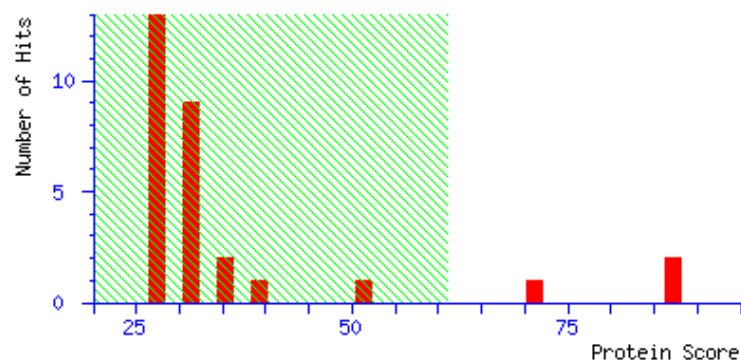

Spot No.: **15**

NCBI accession No.: *cassava4.1\_007971m*|PACid:17991617

Protein name: **Tubulin alpha-6 chain**

Plant species: ***Manihot esculenta*** Mascot score: **103**

Sequence coverage %: **48** p value:  $3.7 \times 10^{-6}$

Matched peptides No.: **18** Total peptides No.: **79**

Calculated Mr: **48294** Calculated *pI*: **4.95**

### Annotated PMF spectra:

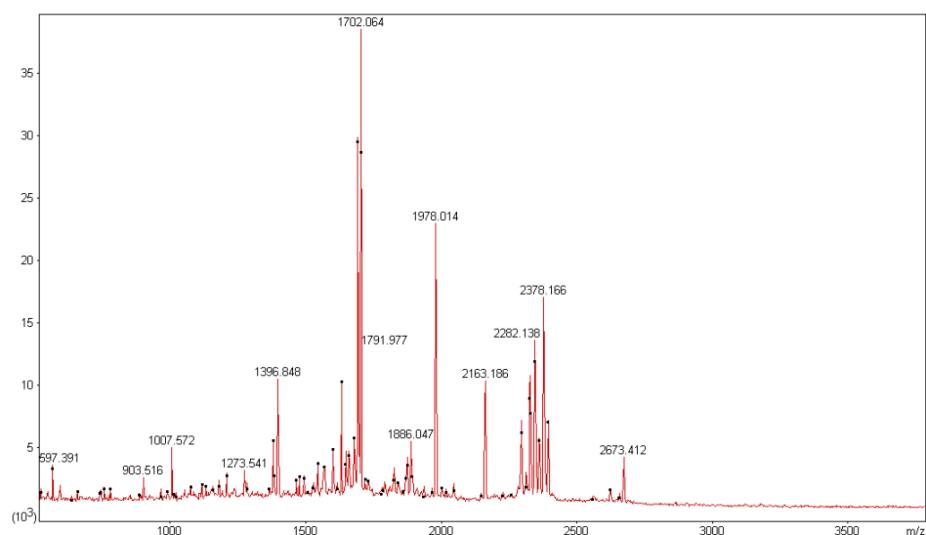

### Probability Based Mowse Score:

Protein score is  $-10 \cdot \log(P)$ , where *P* is the probability that the observed match is a random event. Protein scores greater than 61 are significant ( $p < 0.05$ ).

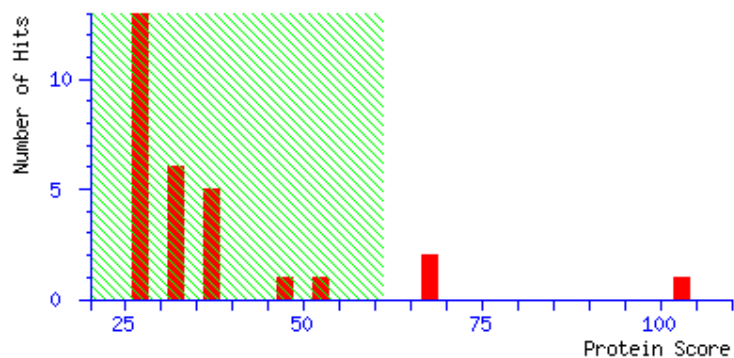

Spot No.: **16**

NCBI accession No.: **cassava4.1\_007560m|PACid:17972004**

Protein name: **Tubulin alpha-6 chain**

Plant species: ***Manihot esculenta*** Mascot score: **89**

Sequence coverage %: **41** p value: **9e-005**

Matched peptides No.: **17** Total peptides No.: **75**

Calculated Mr: **50295** Calculated *pI*: **5.00**

### Annotated PMF spectra:

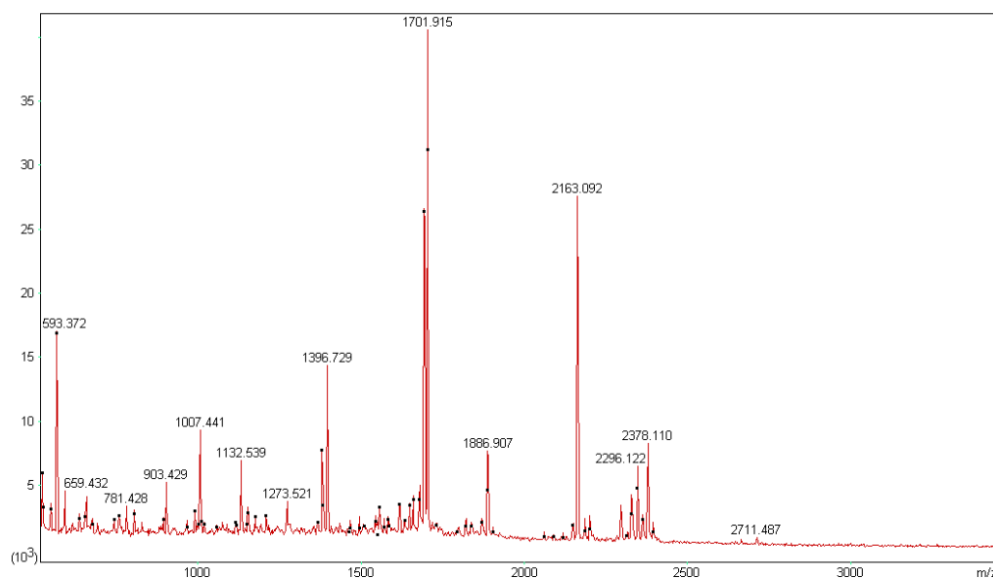

### Probability Based Mowse Score:

Protein score is  $-10 \cdot \log(P)$ , where  $P$  is the probability that the observed match is a random event. Protein scores greater than 61 are significant ( $p < 0.05$ ).

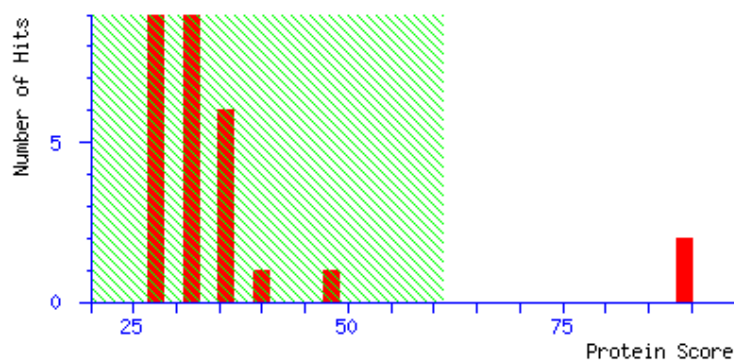

Spot No.: 17

NCBI accession No.: cassava4.1\_033108m|PACid:17973616

Plant species: *Manihot esculenta*

Protein name: **Actin-7** Mascot score: **173**

Sequence coverage %: **70** p value:  $3.7e-013$

Matched peptides No.: **24** Total peptides No.: **90**

Calculated Mr: **41897** Calculated pI: **5.31**

### Annotated PMF spectra:

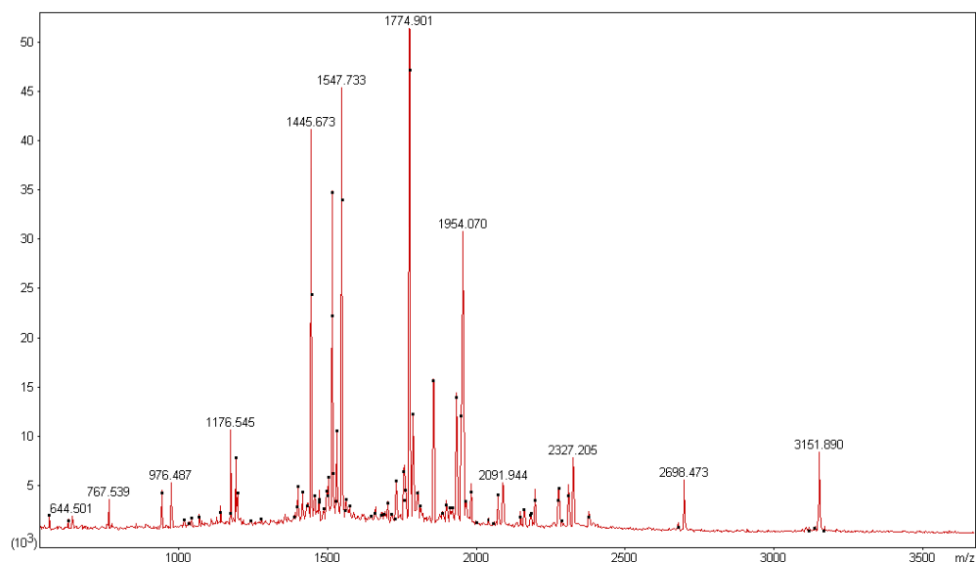

### Probability Based Mowse Score:

Protein score is  $-10 \cdot \log(P)$ , where P is the probability that the observed match is a random event. Protein scores greater than 61 are significant ( $p < 0.05$ ).

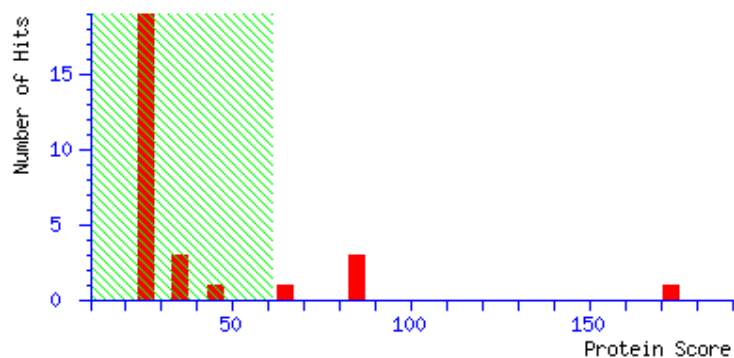

Spot No.: **18**

NCBI accession No.: *cassava4.1\_004726m*|PACid:17976529

Protein name: **ATP synthase beta subunit 1** Plant species:

***Manihot esculenta*** Mascot score: **190**

Sequence coverage %: **62** p value:  $7.3e-015$

Matched peptides No.: **29** Total peptides No.: **89**

Calculated Mr: **60085** Calculated *pI*: **6.13**

### Annotated PMF spectra:

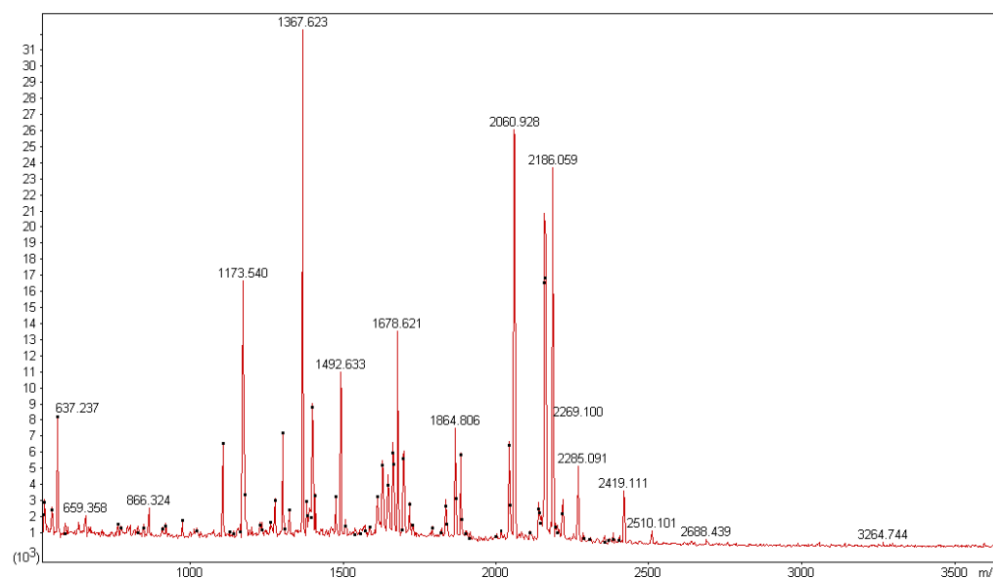

### Probability Based Mowse Score:

Protein score is  $-10 \cdot \log(P)$ , where *P* is the probability that the observed match is a random event. Protein scores greater than 61 are significant ( $p < 0.05$ ).

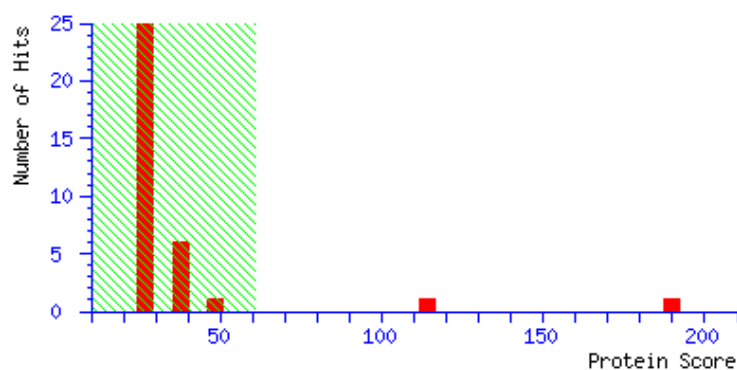



Spot No.: **19**

NCBI accession No.: **cassava4.1\_004630m|PACid:17991144**

Plant species: ***Manihot esculenta***

Protein name: **ATP synthase subunit beta-3, mitochondrial**

Mascot score: **175**

Sequence coverage %: **61**      p value: **2.3e-013**

Matched peptides No.: **29**      Total peptides No.: **63**

Calculated Mr: **60594**      Calculated pI: **6.26**

### Annotated PMF spectra:

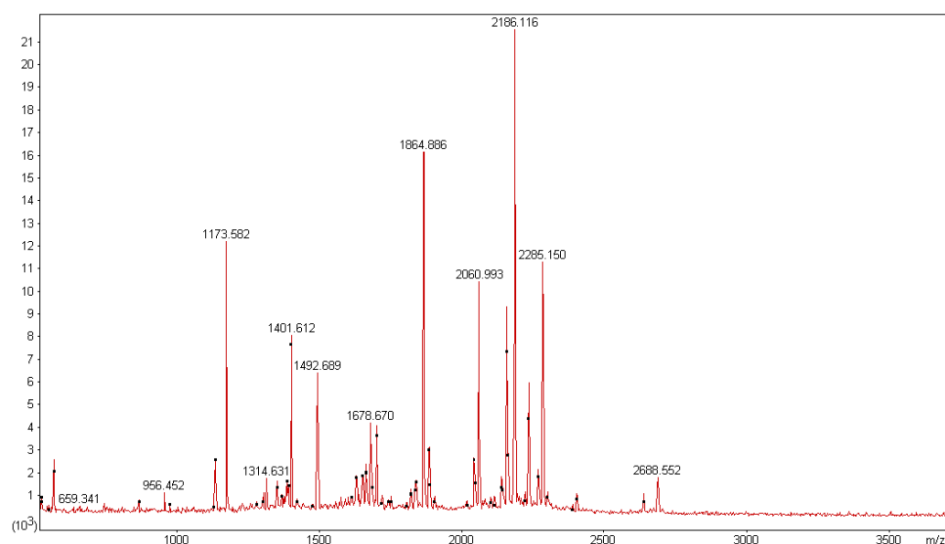

### Probability Based Mowse Score:

Protein score is  $-10 \cdot \log(P)$ , where  $P$  is the probability that the observed match is a random event. Protein scores greater than 61 are significant ( $p < 0.05$ ).

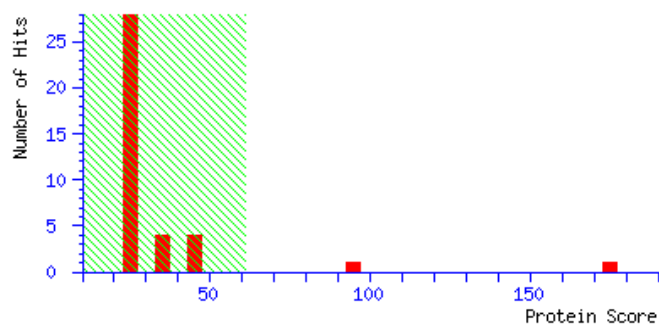

Spot No.: **20**

NCBI accession No.: *cassava4.1\_005518m*|PACid:17993865

Plant species: ***Manihot esculenta***

Protein name: **Glucose-1-phosphate adenylyltransferase**

Mascot score: **182**

Sequence coverage %: **58** p value:  $4.6e-014$

Matched peptides No.: **30**

Total peptides No.: **84**

Calculated Mr: **57581**

Calculated pI: **6.69**

### Annotated PMF spectra:

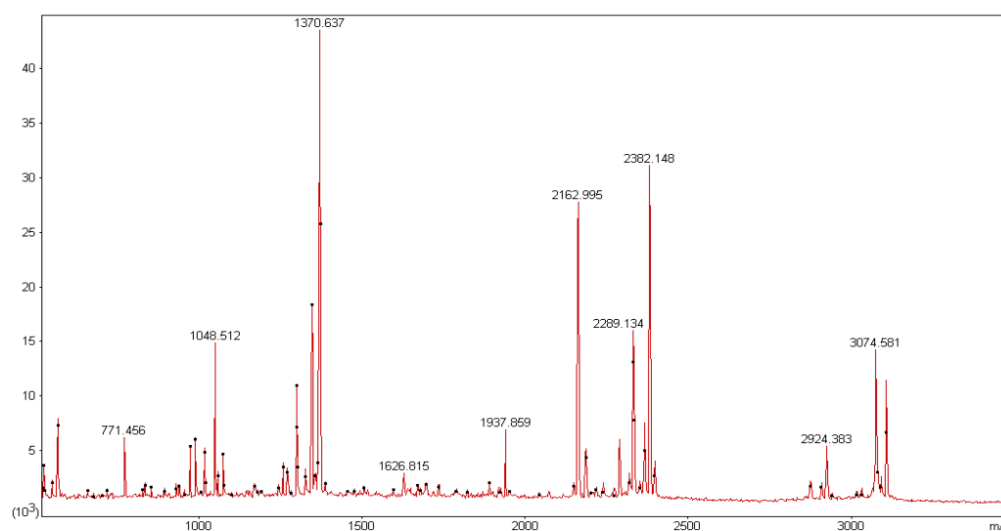

### Probability Based Mowse Score:

Protein score is  $-10 \cdot \log(P)$ , where P is the probability that the observed match is a random event. Protein scores greater than 61 are significant ( $p < 0.05$ ).

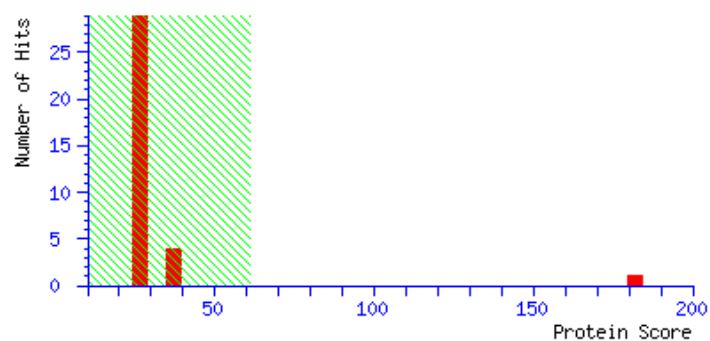

Spot No.: **21**

NCBI accession No.: **cassava4.1\_008086m|PACid:17989319**

Plant species: ***Manihot esculenta***

Protein name: **Glutamine synthetase cytosolic isozyme 1-1**

Mascot score: **101**

Sequence coverage %: **33**      p value: **5.8e-006**

Matched peptides No.: **14**      Total peptides No.: **54**

Calculated Mr: **47502**      Calculated pI: **6.27**

### Annotated PMF spectra:

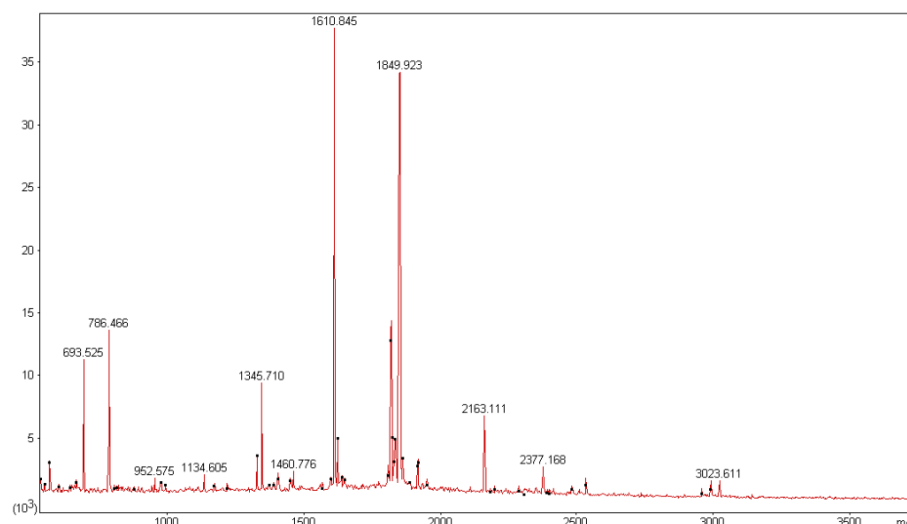

### Probability Based Mowse Score:

Protein score is  $-10 \cdot \log(P)$ , where P is the probability that the observed match is a random event. Protein scores greater than 61 are significant ( $p < 0.05$ ).

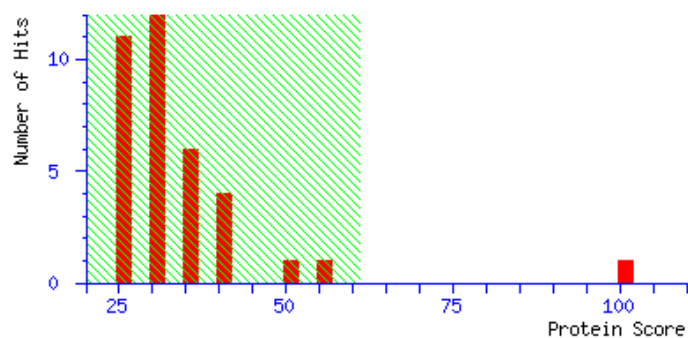

Spot No.: **22**

NCBI accession No.: *cassava4.1\_033108m*|PACid:17973616

Plant species: ***Manihot esculenta***

Protein name: **Actin-7**

Mascot score: **96**

Sequence coverage %: **44**      p value:  $2e-005$

Matched peptides No.: **15**      Total peptides No.: **64**

Calculated Mr: **41897**      Calculated pI: **5.31**

### Annotated PMF spectra:

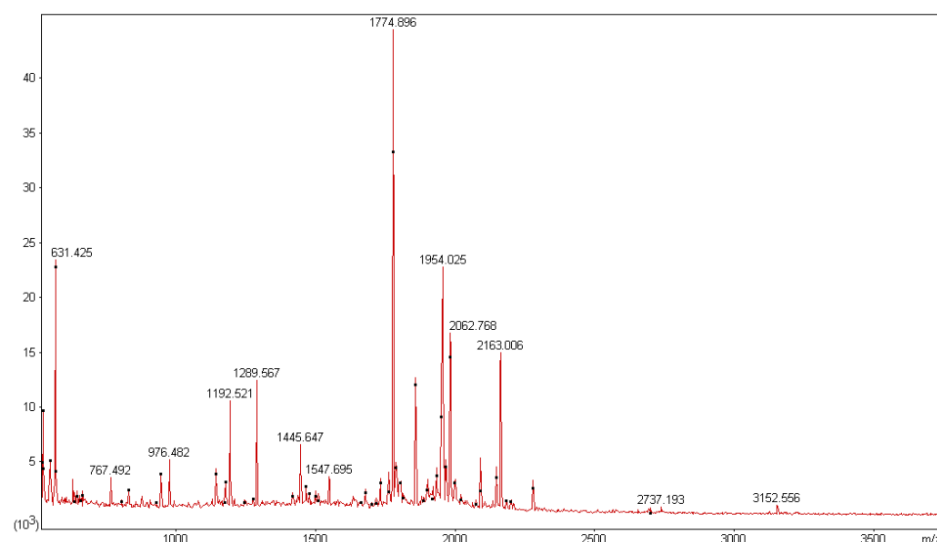

### Probability Based Mowse Score:

Protein score is  $-10 \cdot \log(P)$ , where P is the probability that the observed match is a random event. Protein scores greater than 61 are significant ( $p < 0.05$ ).

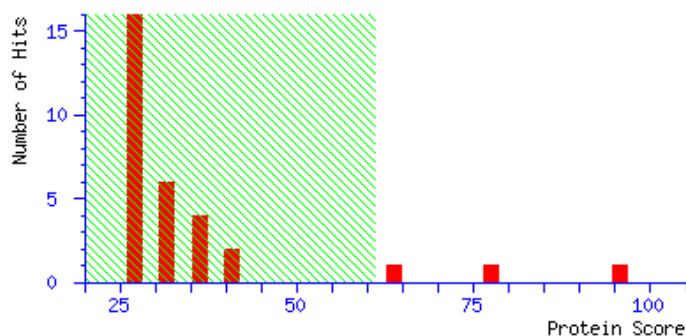

Spot No.: **23**

NCBI accession No.: *cassava4.1\_033108m*|PACid:17973616

Plant species: ***Manihot esculenta***

Protein name: **Actin-7**

Mascot score: **93**

Sequence coverage %: **52**      p value:  $3.4e-005$

Matched peptides No.: **18**      Total peptides No.: **87**

Calculated Mr: **41897**      Calculated pI: **5.31**

### Annotated PMF spectra:

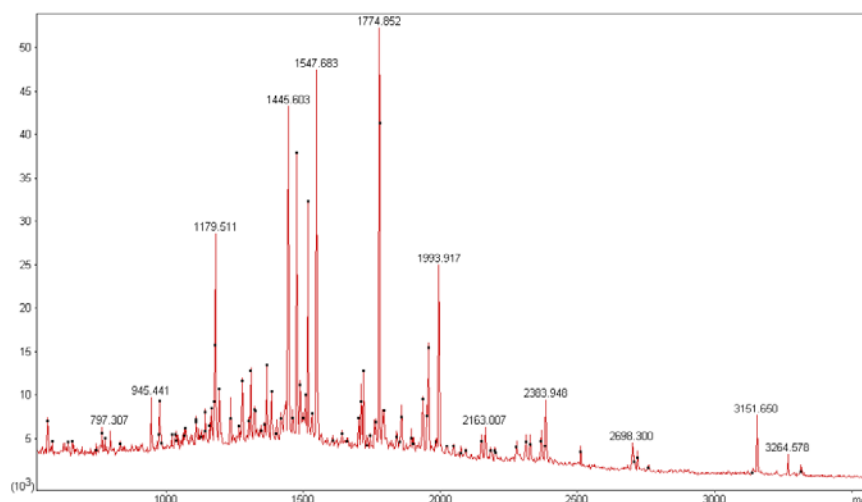

### Probability Based Mowse Score:

Protein score is  $-10 \cdot \log(P)$ , where P is the probability that the observed match is a random event. Protein scores greater than 61 are significant ( $p < 0.05$ ).

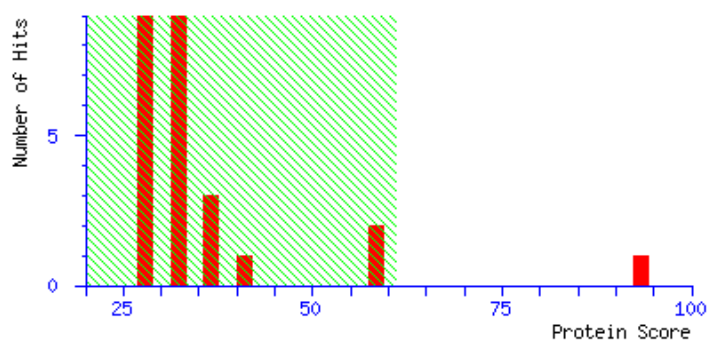

Spot No.: 24

NCBI accession No.: *cassava4.1\_033108m*|PACid:17973616

Plant species: ***Manihot esculenta***

Protein name: **Actin-7** Mascot score: **195**

Sequence coverage %: **63** p value:  $2.3e-015$

Matched peptides No.: **24** Total peptides No.: **85**

Calculated Mr: **41897** Calculated pI: **5.31**

### Annotated PMF spectra:

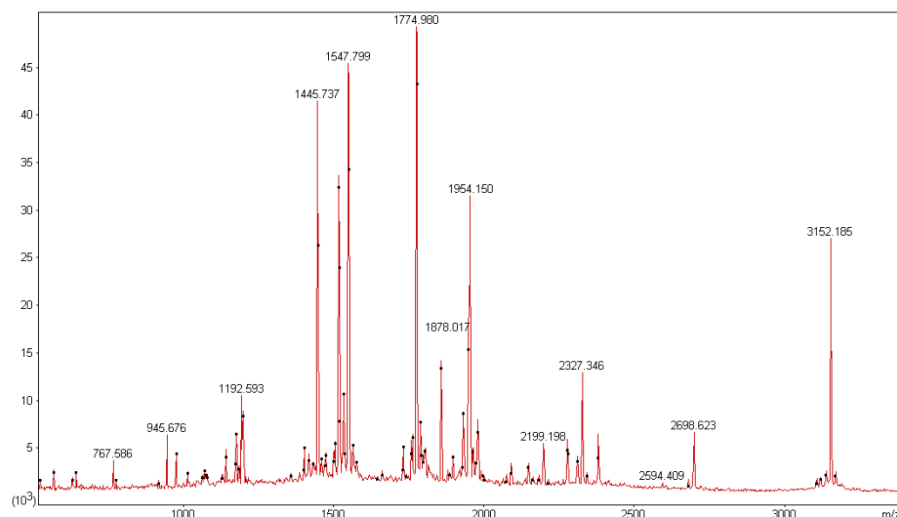

### Probability Based Mowse Score:

Protein score is  $-10 \cdot \log(P)$ , where P is the probability that the observed match is a random event. Protein scores greater than 61 are significant ( $p < 0.05$ ).

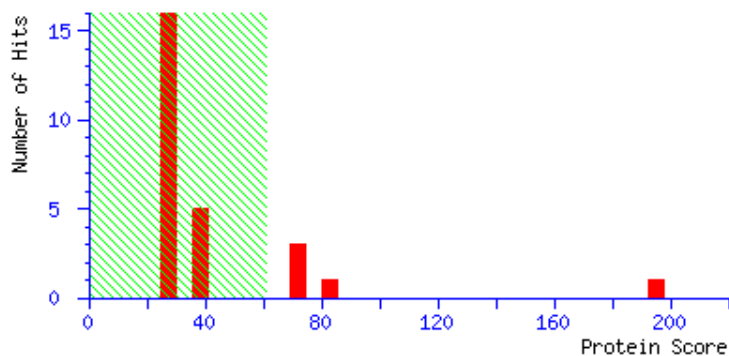

Spot No.: **25**

NCBI accession No.: *cassava4.1\_008387m*|PACid:17968420

Plant species: ***Manihot esculenta***

Protein name: **Succinyl-CoA ligase [ADP-forming] subunit beta,**

**mitochondrial**

Mascot score: **128**

Sequence coverage %: **47**

p value:  $1.2e-008$

Matched peptides No.: **22**

Total peptides No.: **78**

Calculated Mr: **45532**

Calculated pI: **5.88**

### Annotated PMF spectra:

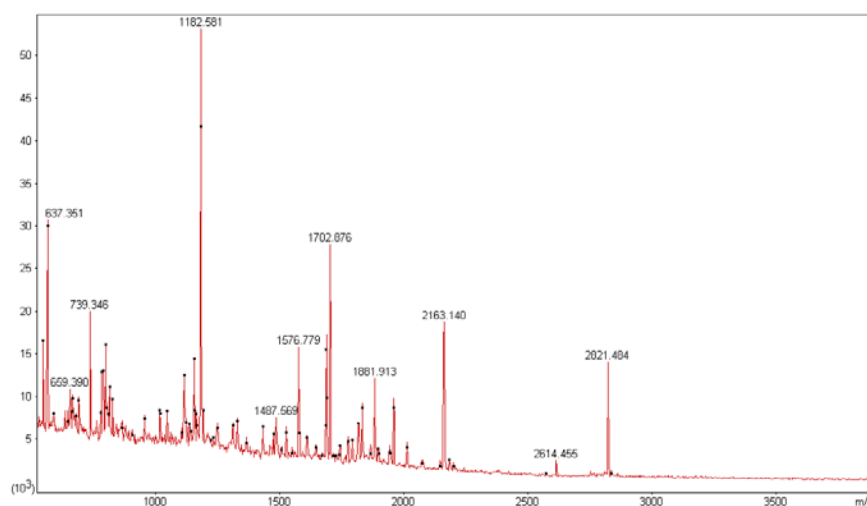

### Probability Based Mowse Score:

Protein score is  $-10 \cdot \log(P)$ , where P is the probability that the observed match is a random event. Protein scores greater than 61 are significant ( $p < 0.05$ ).

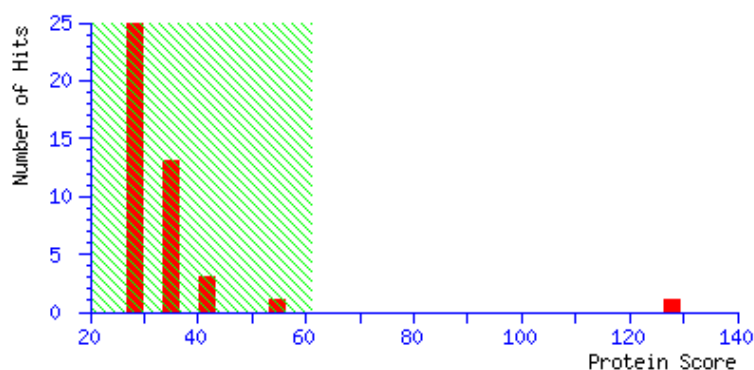

Spot No.: **26**

NCBI accession No.: *cassava4.1\_010597m*|PACid:17964465

Plant species: **Manihot esculenta**

Protein name: **Glutamine synthetase cytosolic isozyme 1-1**

Mascot score: **107**

Sequence coverage %: **51**      p value:  $1.5e-006$

Matched peptides No.: **15**      Total peptides No.: **80**

Calculated Mr: **39359**      Calculated pI: **5.37**

### Annotated PMF spectra:

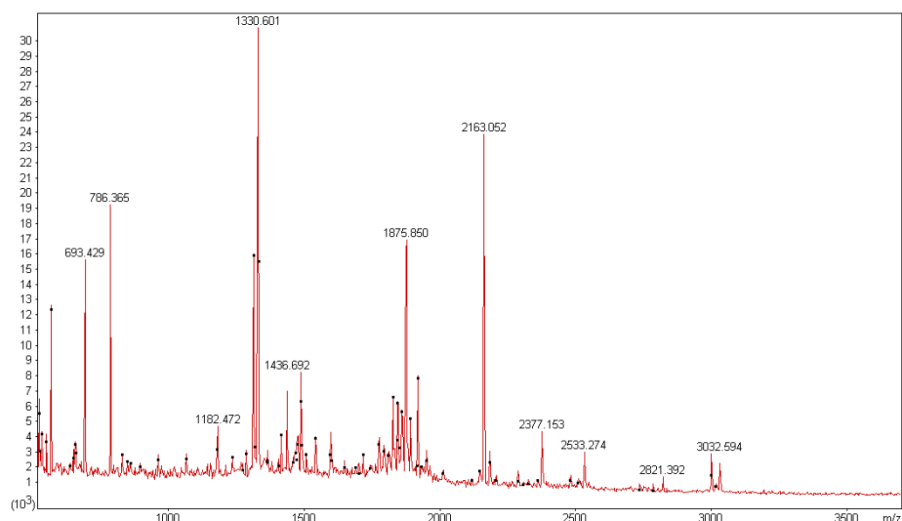

### Probability Based Mowse Score:

Protein score is  $-10 \cdot \log(P)$ , where P is the probability that the observed match is a random event. Protein scores greater than 61 are significant ( $p < 0.05$ ).

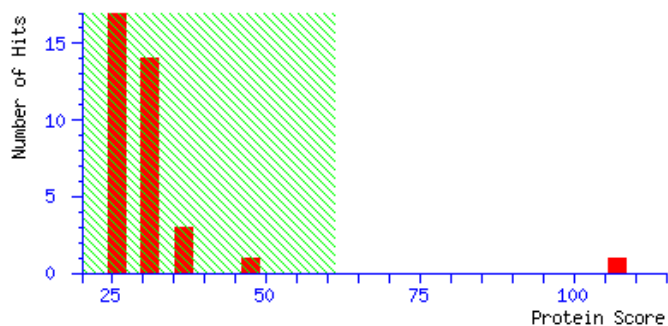



Spot No.: 27

NCBI accession No.: cassava4.1\_011177m|PACid:17972447

Protein name: Adenosine kinase 1 Plant species: *Manihot esculenta*

PFF Mascot score: [113]

Sequence coverage %: [7]

Matched peptides No.: [2]

p value: 3.1e-006

Calculated Mr: 38107

Calculated pI: 5.38

### Annotated PMF spectra:

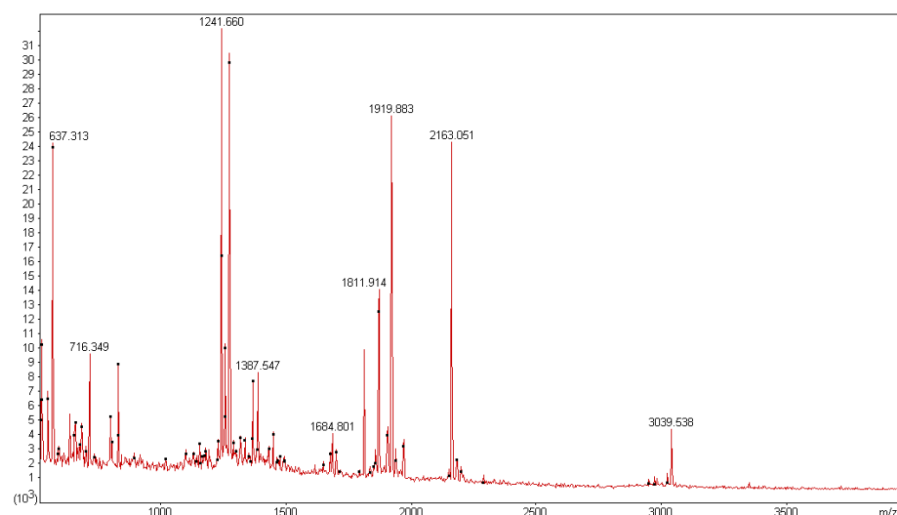

### PFF Searched Score:

Ions score is  $-10 \cdot \log(P)$ , where  $P$  is the probability that the observed match is a random event. Individual ions scores  $> 33$  indicate identity or extensive homology ( $p < 0.05$ ). Protein scores are derived from ions scores as a non-probabilistic basis for ranking protein hits.

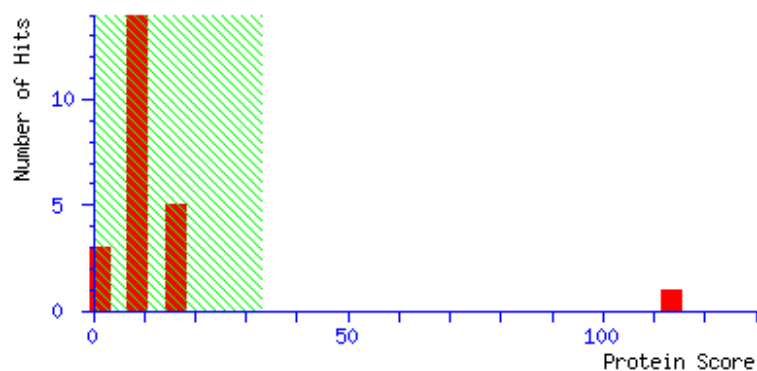

Spot No.: **28**

NCBI accession No.: *cassava4.1\_002747m*|PACid:17960141

Plant species: ***Manihot esculenta***

Protein name: **Heat shock protein 90-3** Mascot score: **127**

Sequence coverage %: **37** p value:  $1.5e-008$

Matched peptides No.: **33**

Total peptides No.: **77**

Calculated Mr: **80250**

Calculated pI: **4.99**

### Annotated PMF spectra:

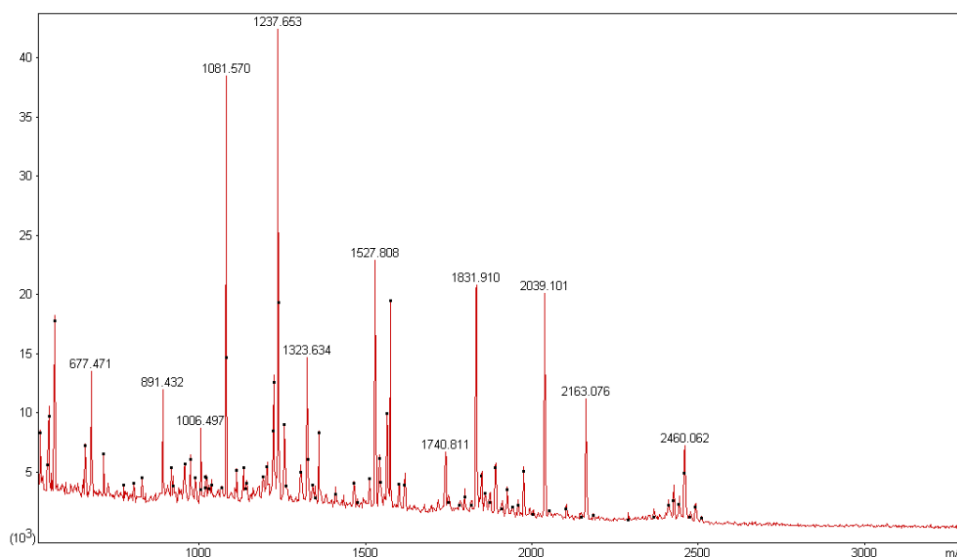

### Probability Based Mowse Score:

Protein score is  $-10 \cdot \log(P)$ , where P is the probability that the observed match is a random event. Protein scores greater than 61 are significant ( $p < 0.05$ ).

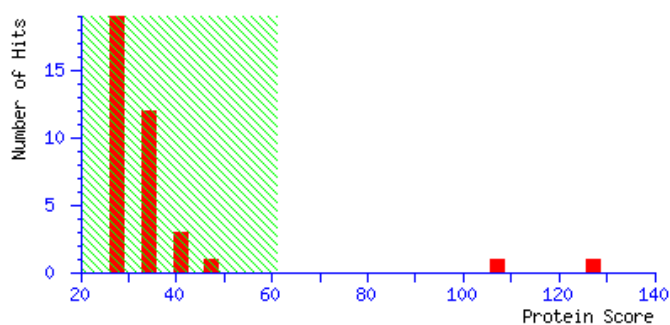

Spot No.: **29**

NCBI accession No.: *cassava4.1\_002466m*|PACid:17978799

Plant species: ***Manihot esculenta***

Protein name: **Alpha-glucan phosphorylase 1**

Mascot score: **81**

Sequence coverage %: **24**      p value: **0.00058**

Matched peptides No.: **24**      Total peptides No.: **95**

Calculated Mr: **81918**      Calculated pI: **8.50**

### Annotated PMF spectra:

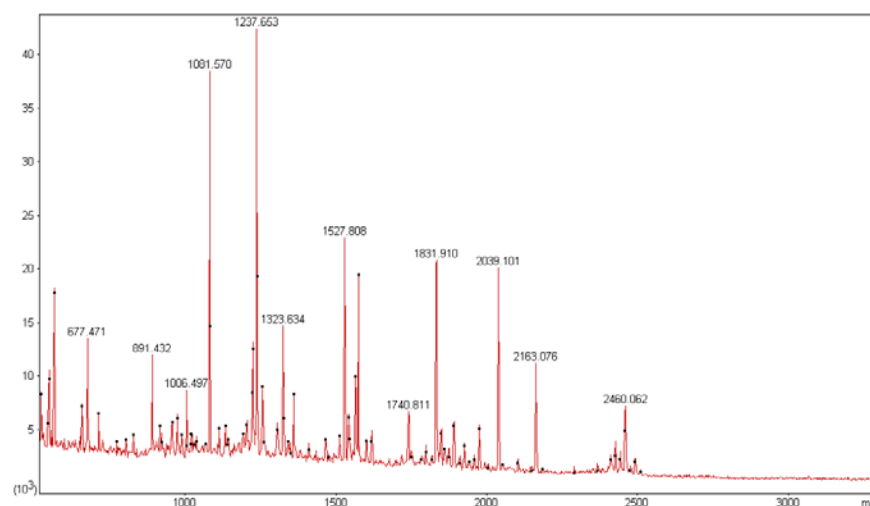

### Probability Based Mowse Score:

Protein score is  $-10 \cdot \log(P)$ , where P is the probability that the observed match is a random event. Protein scores greater than 61 are significant ( $p < 0.05$ ).

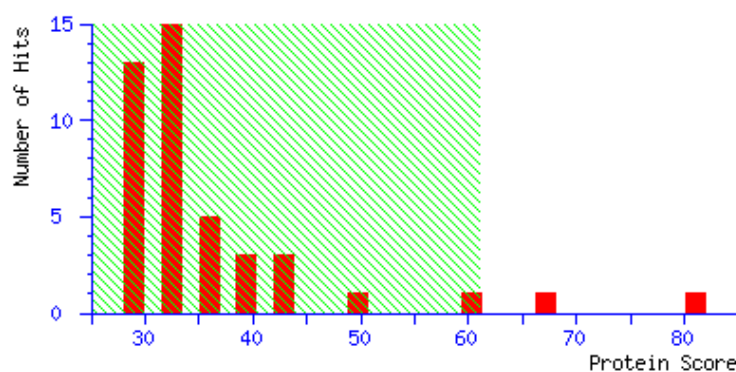

Spot No.: **30**

NCBI accession No.: *cassava4.1\_002466m*[PACid:17978799]

Plant species: **Manihot esculenta**

Protein name: **Alpha-glucan phosphorylase 1**

PFF Mascot score: **[387]** Sequence coverage %: **[12]**

Matched peptides No.: **[7]** p value: 3.5e-008

Calculated Mr: 81918

Calculated pI: **8.50**

### Annotated PMF spectra:

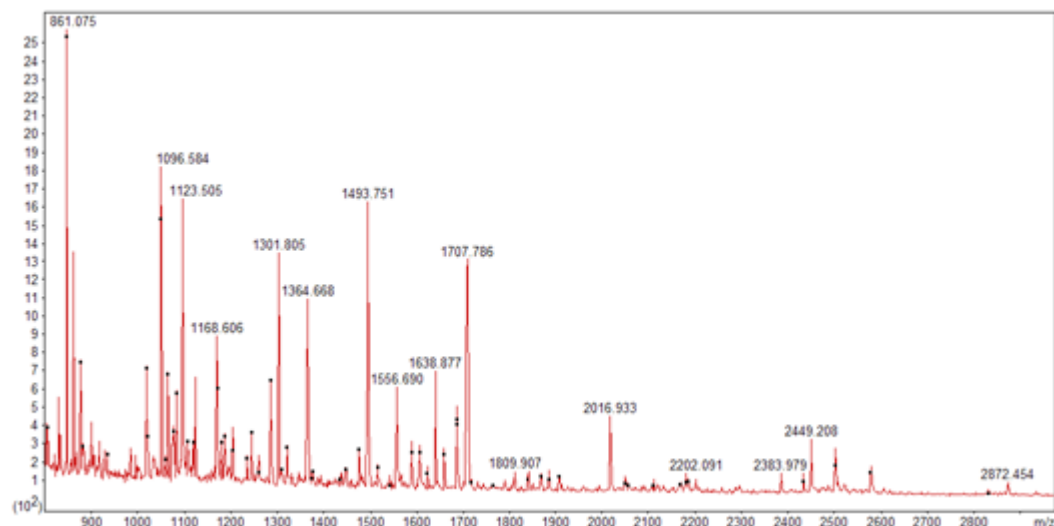

### PFF Searched Score:

Ions score is  $-10 \cdot \log(P)$ , where P is the probability that the observed match is a random event.

Individual ions scores  $> 33$  indicate identity or extensive homology ( $p < 0.05$ ).

Protein scores are derived from ions scores as a non-probabilistic basis for ranking protein hits.

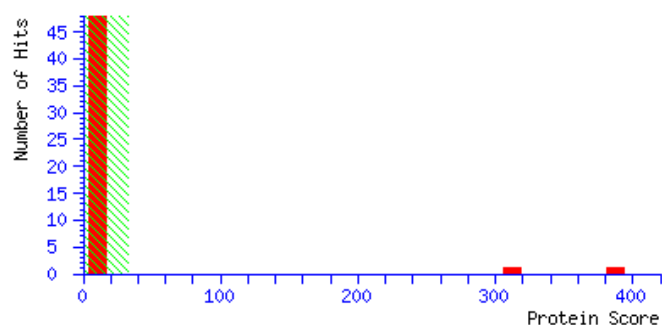

Spot No.: **31**

NCBI accession No.: *cassava4.1\_002614m*|PACid:17978880

Plant species: ***Manihot esculenta***

Protein name: **Alpha-glucan phosphorylase 1**

Mascot score: **76** p value: **0.019**

Sequence coverage %: **32**

Matched peptides No.: **16** Total peptides No.: **58**

Calculated Mr: **80611** Calculated pI: **6.71**

### Annotated PMF spectra:

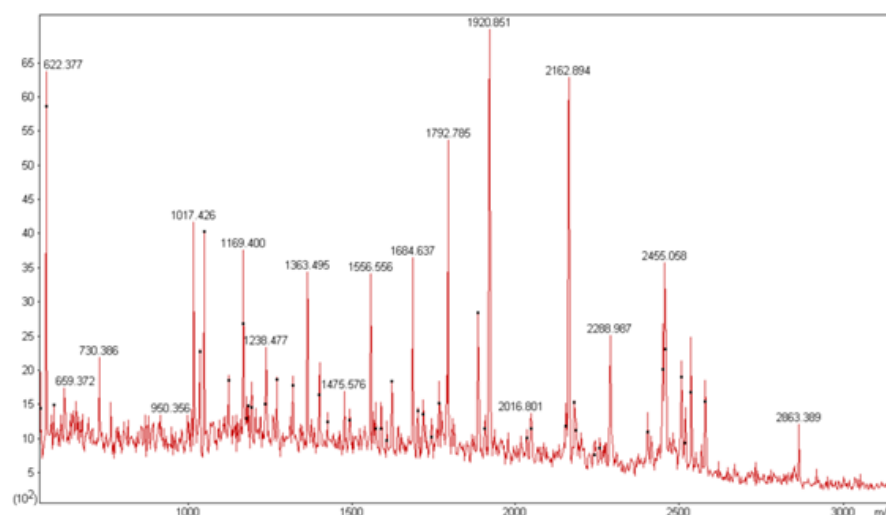

### Probability Based Mowse Score:

Protein score is  $-10 \cdot \log(P)$ , where P is the probability that the observed match is a random event. Protein scores greater than 61 are significant ( $p < 0.05$ ).

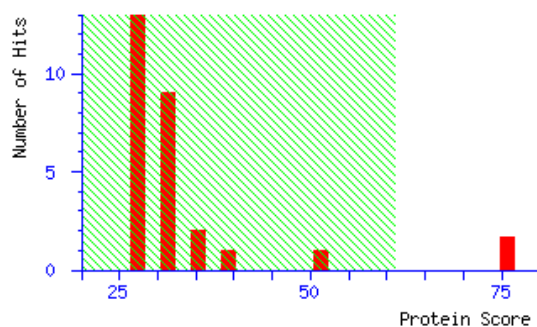

Spot No.: **32**

NCBI accession No.: **cassava4.1\_002466m|PACid:17978799**

Plant species: ***Manihot esculenta***

Protein name: **Alpha-glucan phosphorylase 1**

Sequence coverage %: **[2]** Matched peptides No.: **[5]**

PFF Mascot score: **[110]** p value: **6.8e-005**

Calculated Mr: **81918**

Calculated pI: **8.50**

### Annotated PMF spectra:

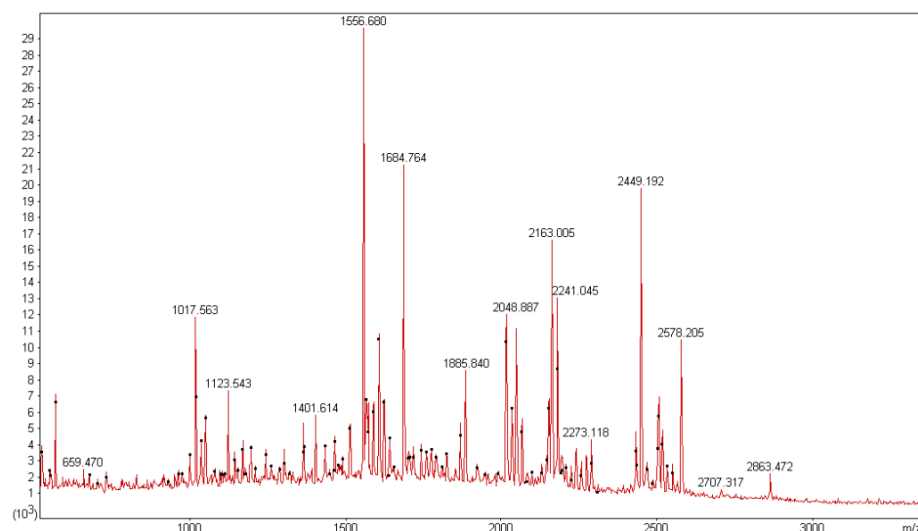

### PFF Searched Score:

Ions score is  $-10 \cdot \log(P)$ , where P is the probability that the observed match is a random event.

Individual ions scores  $> 33$  indicate identity or extensive homology ( $p < 0.05$ ).

Protein scores are derived from ions scores as a non-probabilistic basis for ranking protein hits.

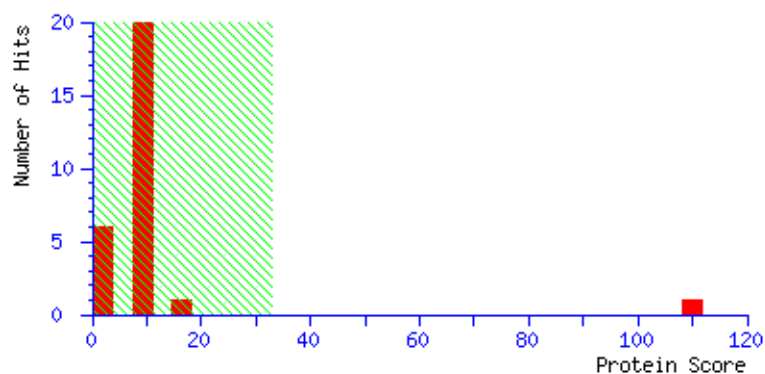

Spot No.: **33**

NCBI accession No.: *cassava4.1\_002466m*|PACid:17978799

Plant species: ***Manihot esculenta***

Protein name: **Alpha-glucan phosphorylase 1**

Mascot score: **101**

Sequence coverage %: **40**      p value: 5.8e-006

Matched peptides No.: **24**      Total peptides No.: **98**

Calculated Mr: **81918**      Calculated pI: **8.50**

### Annotated PMF spectra:

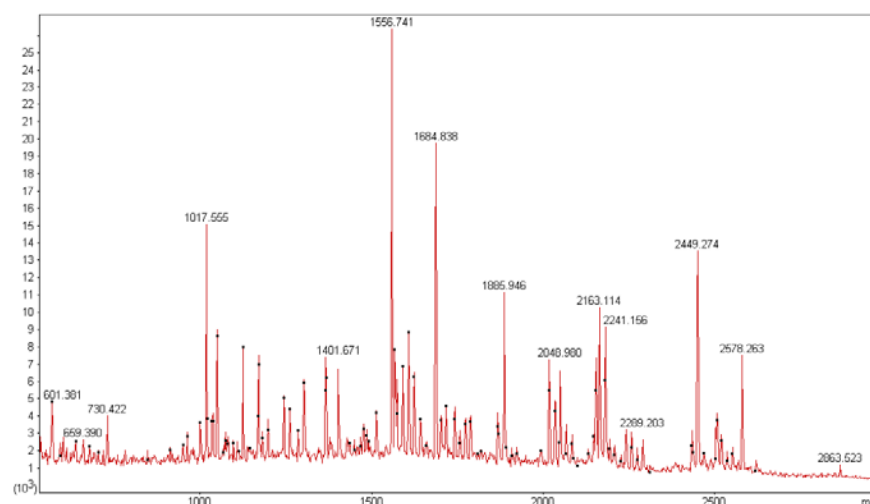

### Probability Based Mowse Score:

Protein score is  $-10 \cdot \log(P)$ , where P is the probability that the observed match is a random event. Protein scores greater than 61 are significant ( $p < 0.05$ ).

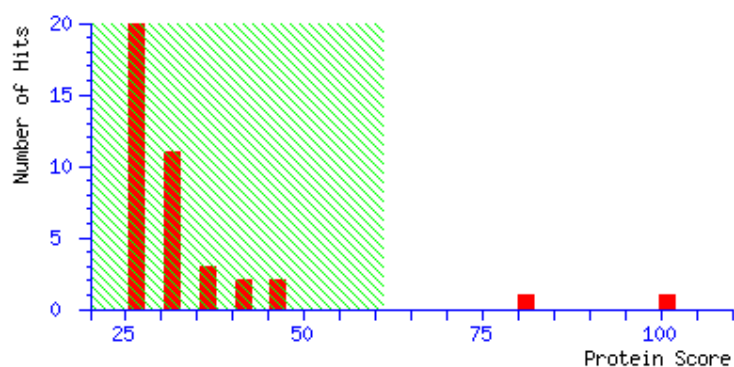

Spot No.: **34**

NCBI accession No.: *cassava4.1\_014251m|PACid:17989805*

Plant species: ***Manihot esculenta***

Protein name: **14-3-3-like protein GF14 omega**

Mascot score: **115**

Sequence coverage %: **44**      p value:  $2.3e-007$

Matched peptides No.: **16**                      Total peptides No.: **46**

Calculated Mr: **29447**                      Calculated pI: **4.77**

### Annotated PMF spectra:

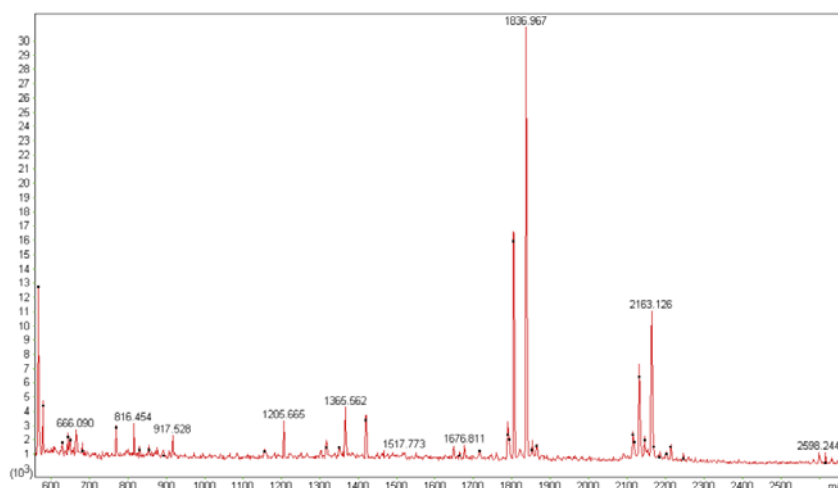

### Probability Based Mowse Score:

Protein score is  $-10 \cdot \log(P)$ , where P is the probability that the observed match is a random event. Protein scores greater than 61 are significant ( $p < 0.05$ ).

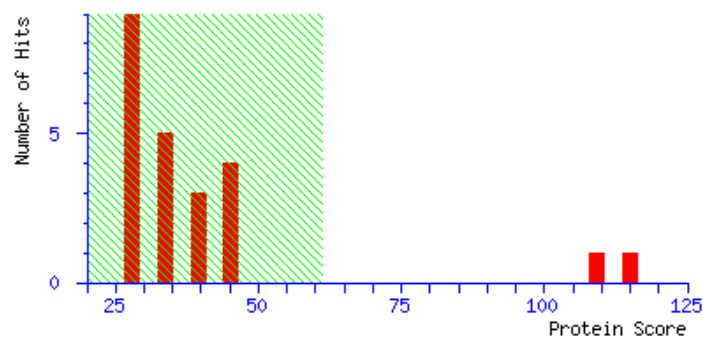



Spot No.: **35**

NCBI accession No.: *cassava4.1\_014208m*|PACid:17964823

Plant species: **Manihot esculenta**

Protein name: **14-3-3-like protein GF14 omega**

Mascot score: **159**                      p value: **9.2e-012**

Sequence coverage %: **54**

Matched peptides No.: **21**                      Total peptides No.: **56**

Calculated Mr: **29548**                      Calculated pI: **4.76**

### Annotated PMF spectra:

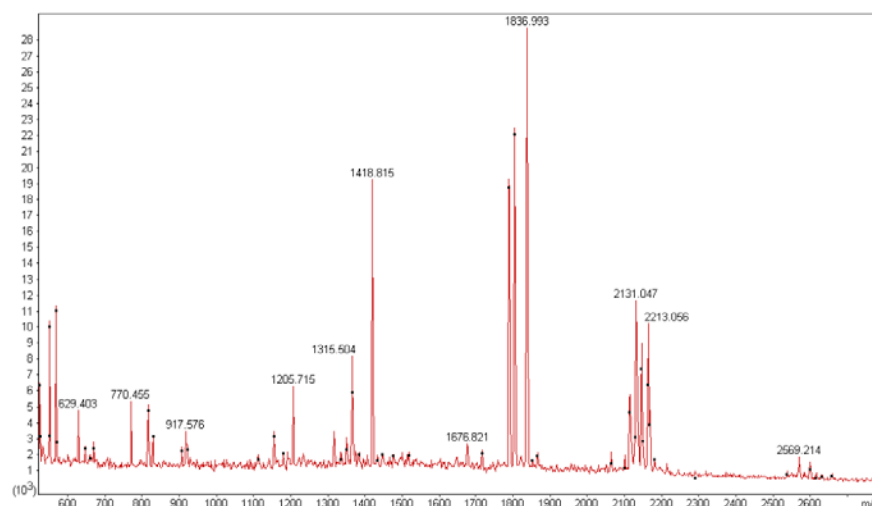

### Probability Based Mowse Score:

Protein score is  $-10 \cdot \log(P)$ , where P is the probability that the observed match is a random event. Protein scores greater than 61 are significant ( $p < 0.05$ ).

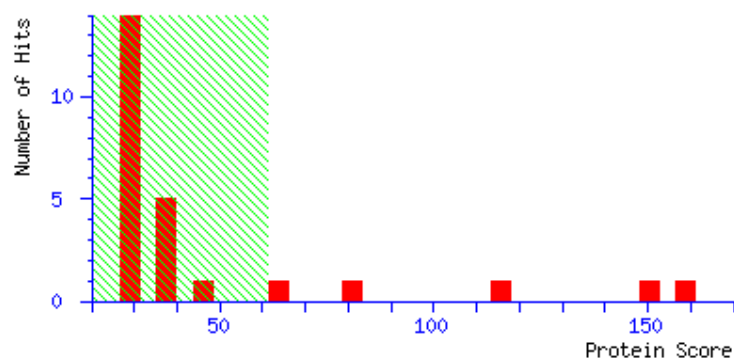

Spot No.: **36**

NCBI accession No.: *cassava4.1\_014065m*|PACid:17989625

Plant species: ***Manihot esculenta***

Protein name: **14-3-3-like protein GF14 psi** Mascot score: **111**

Sequence coverage %: **60** p value: **5.8e-07**

Matched peptides No.: **16**

Total peptides No.: **67**

Calculated Mr: **29927**

Calculated pI: **4.75**

### Annotated PMF spectra:

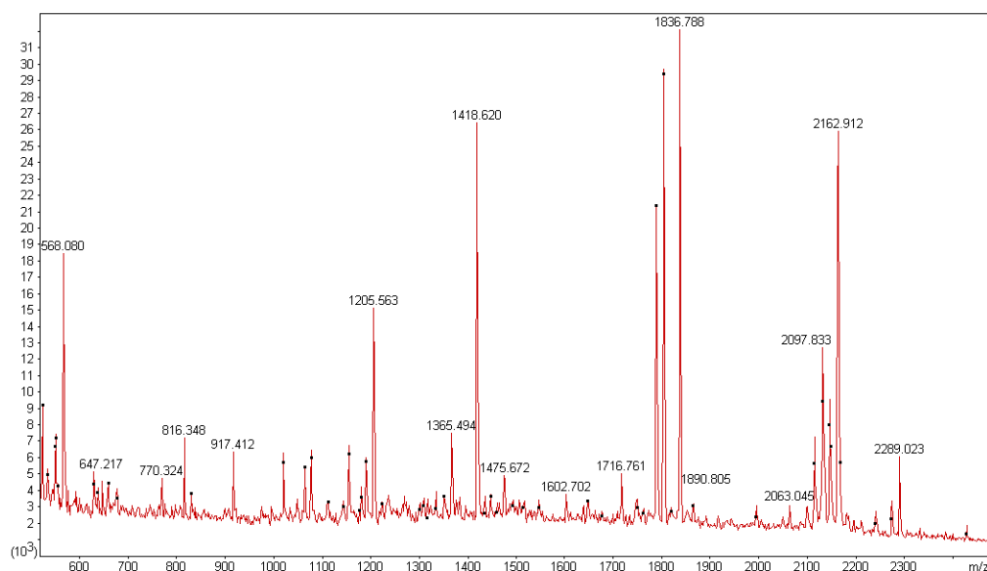

### Probability Based Mowse Score:

Protein score is  $-10 \cdot \log(P)$ , where P is the probability that the observed match is a random event. Protein scores greater than 61 are significant ( $p < 0.05$ ).

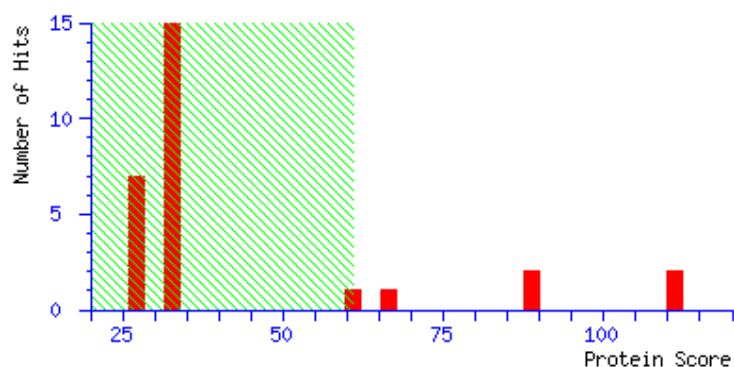

Spot No.: **37**

NCBI accession No.: **cassava4.1\_011584m|PACid:17982732**

Protein name: **Probable fructokinase-1**

Plant species: ***Manihot esculenta***

**PFF Mascot score: [154] Sequence coverage %: [7]**

Matched peptides No.: **[2]** p value: **6.9e-007**

Calculated Mr: **35621**

Calculated pI: **5.12**

### Annotated PMF spectra:

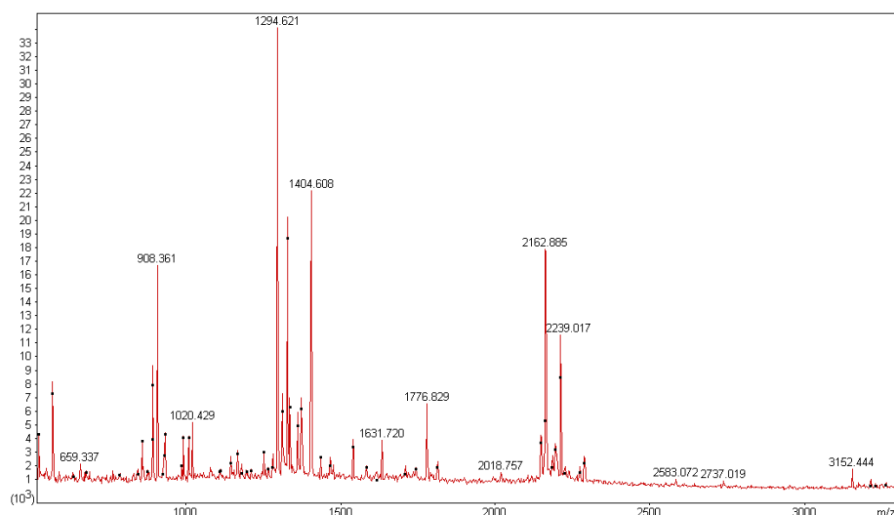

### PFF Searched Score:

Ions score is  $-10 \cdot \log(P)$ , where P is the probability that the observed match is a random event.

Individual ions scores  $> 34$  indicate identity or extensive homology ( $p < 0.05$ ).

Protein scores are derived from ions scores as a non-probabilistic basis for ranking protein hits.

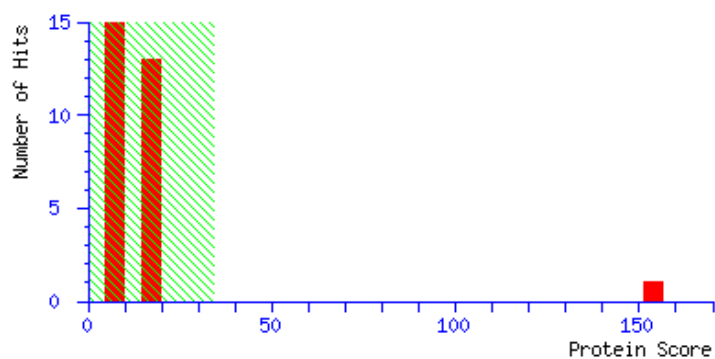

Spot No.: **38**

NCBI accession No.: *cassava4.1\_011584m|PACid:17982732*

Plant species: ***Manihot esculenta***

Protein name: **Probable fructokinase-1**

**PFF Mascot score: [147]      Sequence coverage %: [11]**

**Matched peptides No.: [3]      p value: 9.6e-006**

**Calculated Mr: 35621      Calculated pI: 5.12**

### **Annotated PMF spectra:**

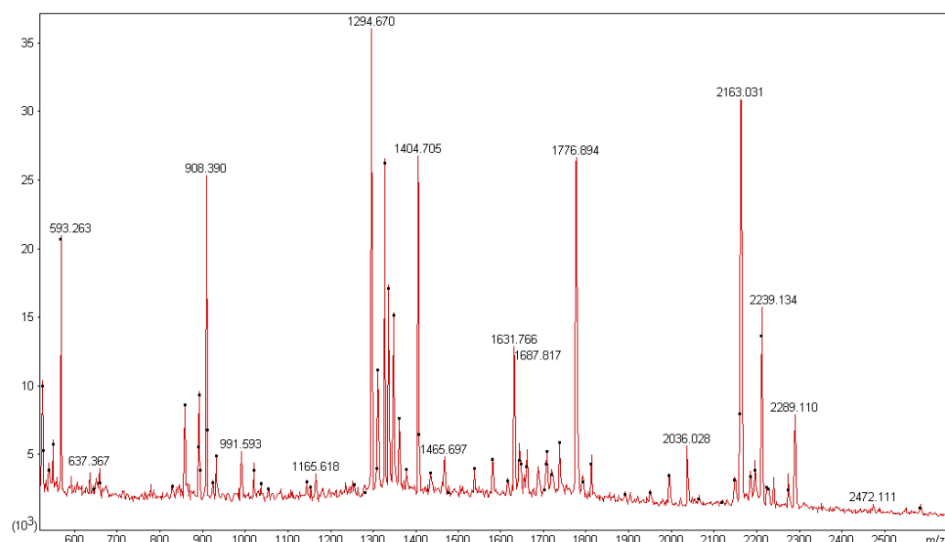

### **PFF Searched Score:**

Ions score is  $-10 \cdot \log(P)$ , where P is the probability that the observed match is a random event. Individual ions scores  $> 34$  indicate identity or extensive homology ( $p < 0.05$ ). Protein scores are derived from ions scores as a non-probabilistic basis for ranking protein hits.

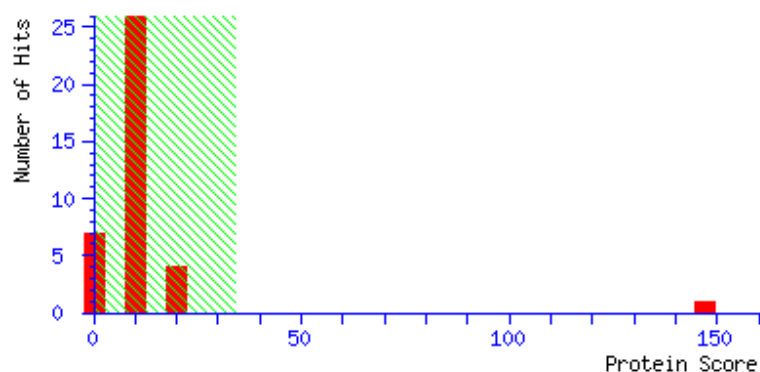

Spot No.: **39**

NCBI accession No.: *cassava4.1\_013158m* | PACid:17968853 p value: **0.0017**

Plant species: ***Manihot esculenta***

Protein name: **Probable lactoylglutathione lyase, chloroplast**

Mascot score: **151**

Sequence coverage %: **55** p value: **5.8e-011**

Matched peptides No.: **19**

Total peptides No.: **77**

Calculated Mr: **32759**

Calculated pI: **5.17**

### Annotated PMF spectra:

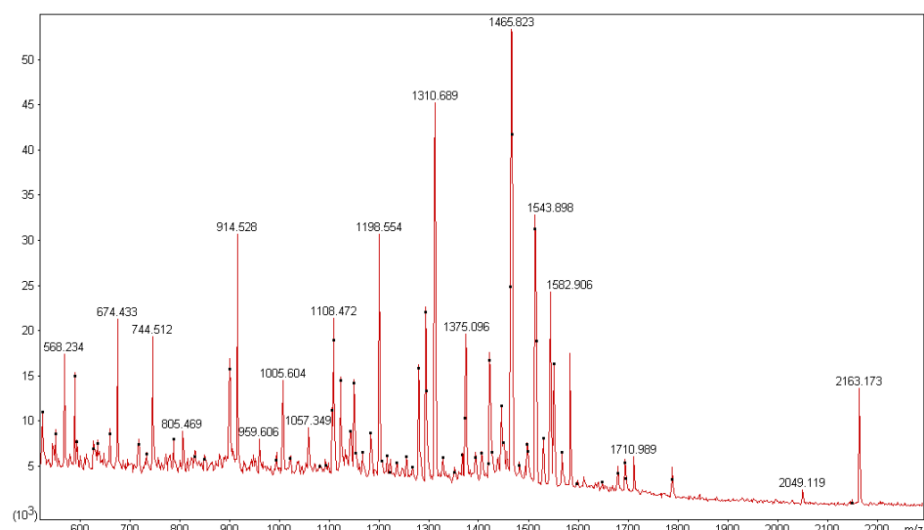

### Probability Based Mowse Score:

Protein score is  $-10 \cdot \log(P)$ , where P is the probability that the observed match is a random event.

Protein scores greater than 61 are significant ( $p < 0.05$ ).

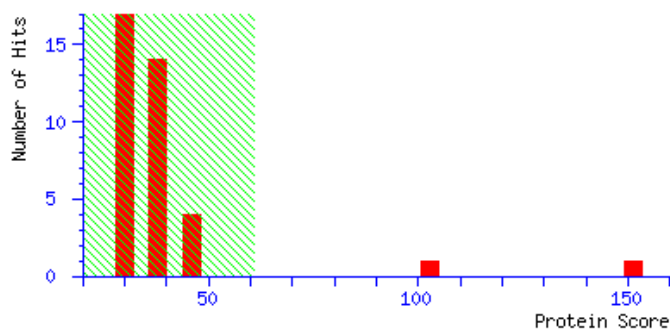

Spot No.: **40**

NCBI accession No.: **cassava4.1\_013158m|PACid:17968853**

Plant species: ***Manihot esculenta***

Protein name: **Probable lactoylglutathione lyase, chloroplast**

PFF Mascot score: **[73]**      Sequence coverage %: **[8]**

Matched peptides No.: **[2]**      p value: 6.1e-006

Calculated Mr: **32759**      Calculated pI: **5.17**

### Annotated PMF spectra:

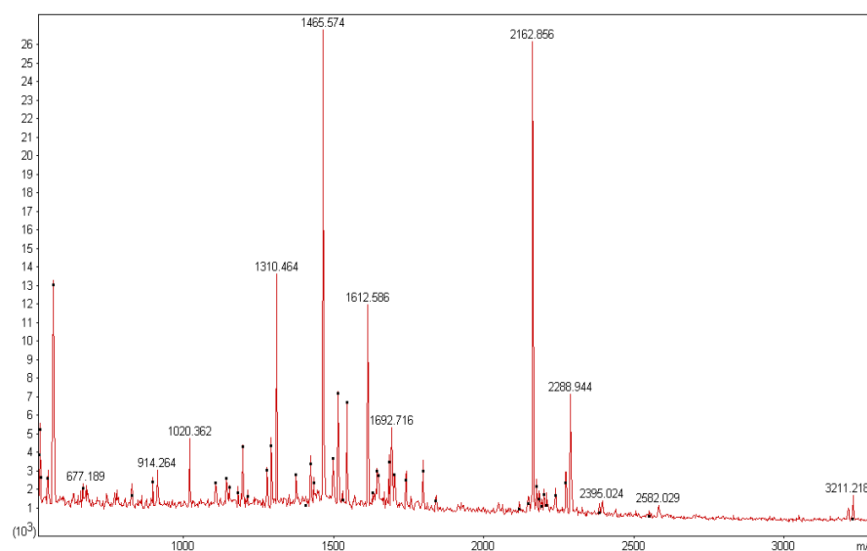

### PFF Searched Score:

Ions score is  $-10 \cdot \log(P)$ , where P is the probability that the observed match is a random event.

Individual ions scores  $> 33$  indicate identity or extensive homology ( $p < 0.05$ ).

Protein scores are derived from ions scores as a non-probabilistic basis for ranking protein hits.

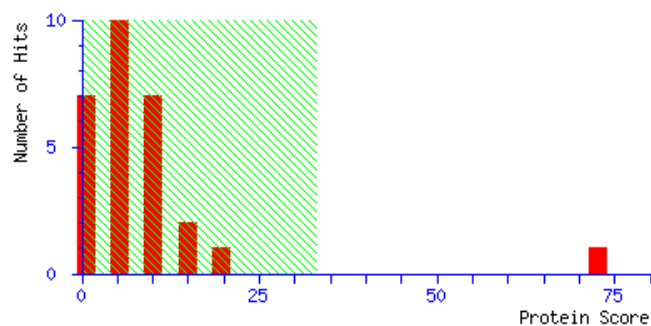

Spot No.: 41

NCBI accession No.: cassava4.1\_012601m|PACid:17970211

Plant species: *Manihot esculenta*

Protein name: Putative carboxyphosphoenolpyruvate mutase

PFF Mascot score: [187]

Sequence coverage %:

[10]

Matched peptides No.: [2]

p value: 1.2e-009

Calculated Mr: 32938

Calculated pI: 5.32

### Annotated PMF spectra:

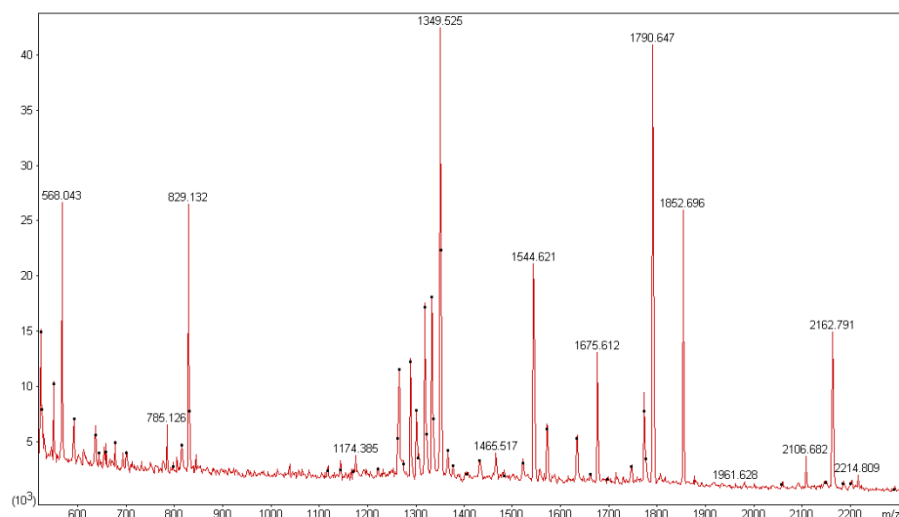

### PFF Searched Score:

Ions score is  $-10 \cdot \log(P)$ , where P is the probability that the observed match is a random event.

Individual ions scores > 33 indicate identity or extensive homology ( $p < 0.05$ ).

Protein scores are derived from ions scores as a non-probabilistic basis for ranking protein hits.

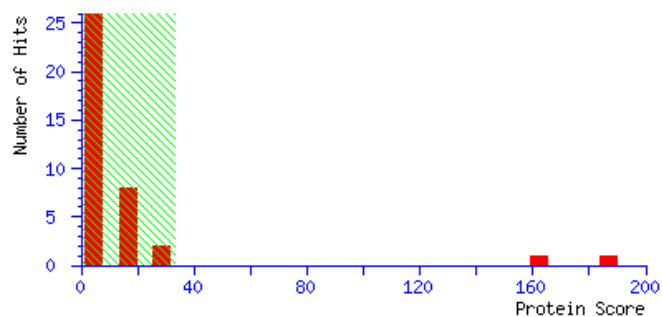

Spot No.: **42**

NCBI accession No.: *cassava4.1\_011578m*|PACid:17975802

Plant species: ***Manihot esculenta***

Protein name: **Probable fructokinase-1**

PFF Mascot score: **[146]**

Sequence coverage %: **[11]**

Matched peptides No.: **[3]**

p value: **0.00019**

Calculated Mr: **35491**

Calculated pI: **5.29**

### Annotated PMF spectra:

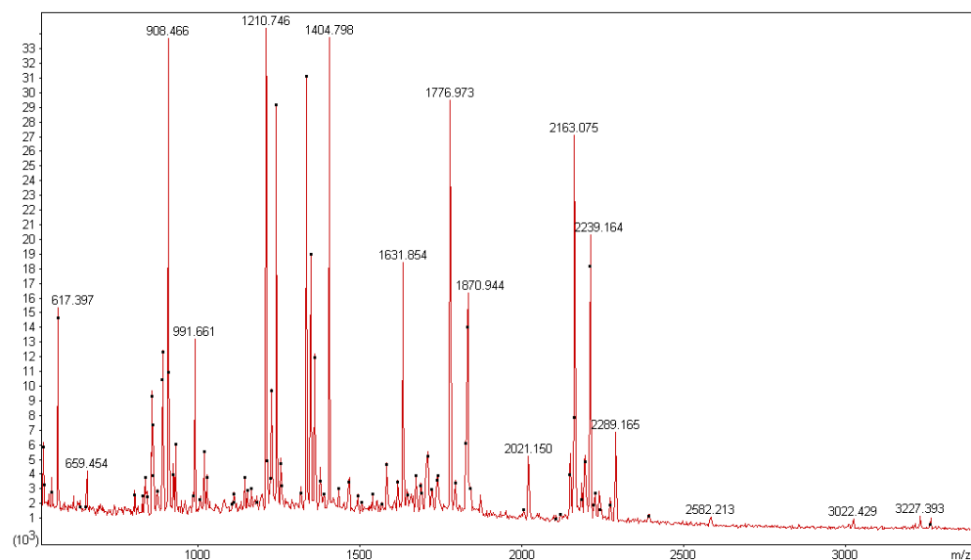

### PFF Searched Score:

Ions score is  $-10 \cdot \log(P)$ , where P is the probability that the observed match is a random event.

Individual ions scores  $> 33$  indicate identity or extensive homology ( $p < 0.05$ ).

Protein scores are derived from ions scores as a non-probabilistic basis for ranking protein hits.

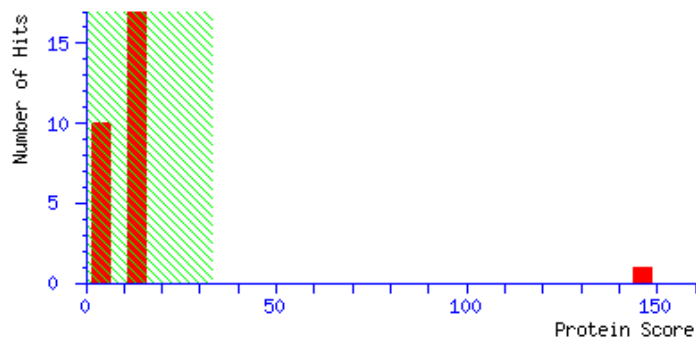



Spot No.: **43**

NCBI accession No.: *cassava4.1\_010863m*|PACid:17977552

Plant species: **Manihot esculenta**

Protein name: NADP-dependent alkenal double bond reductase P1

PFF Mascot score: **[81]**      Sequence coverage %: **[7]**

Matched peptides No.: **[2]**      p value: **3.6e-006**

Calculated Mr: **38818**      Calculated pI: **5.41**

### Annotated PMF spectra:

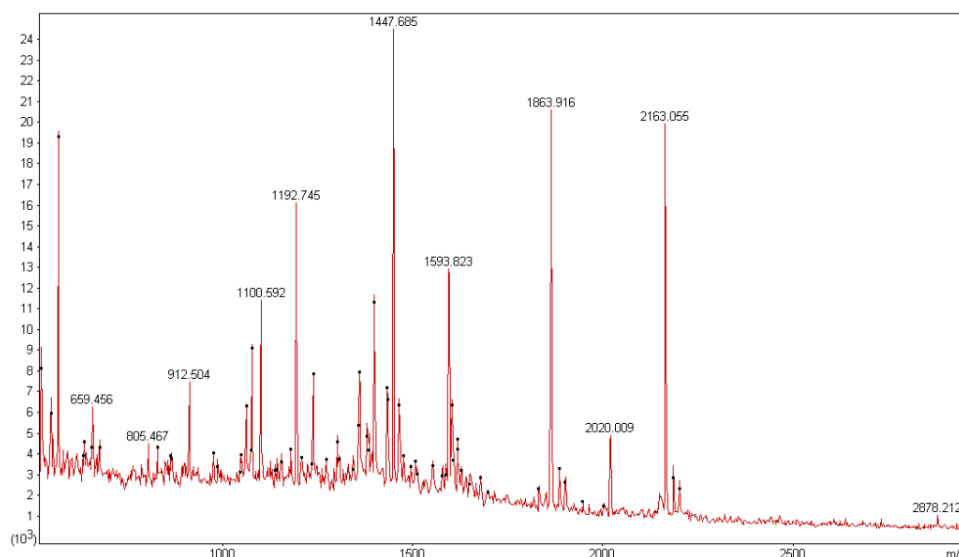

### PFF Searched Score:

Ions score is  $-10 \cdot \log(P)$ , where P is the probability that the observed match is a random event.

Individual ions scores  $> 33$  indicate identity or extensive homology ( $p < 0.05$ ).

Protein scores are derived from ions scores as a non-probabilistic basis for ranking protein hits.

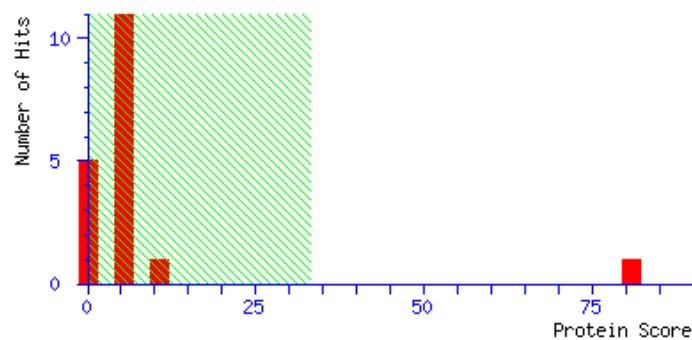

Spot No.: **44**

NCBI accession No.: **cassava4.1\_010863m|PACid:17977552**

Plant species: ***Manihot esculenta***

Protein name: **NADP-dependent alkenal double bond reductase**

PFF Mascot score: **[99]**      Sequence coverage %: **[7]**

Matched peptides No.: **[2]**      p value: **7.3e-008**

Calculated Mr: **38818**      Calculated pI: **5.41**

### Annotated PMF spectra:

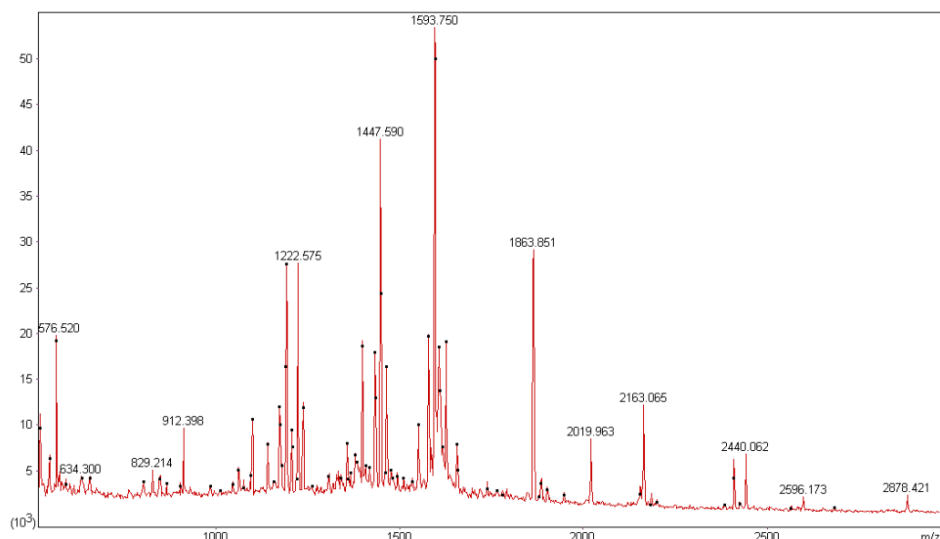

### PFF Searched Score:

Ions score is  $-10 \cdot \log(P)$ , where P is the probability that the observed match is a random event.

Individual ions scores  $> 33$  indicate identity or extensive homology ( $p < 0.05$ ).

Protein scores are derived from ions scores as a non-probabilistic basis for ranking protein hits.

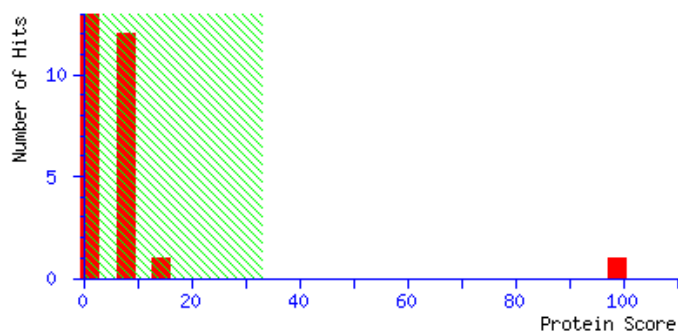

Spot No.: **45**

NCBI accession No.: **cassava4.1\_011869m|PACid:17965954**

Plant species: ***Manihot esculenta***

Protein name: **DNA-damage-repair/toleration protein DRT102**

PFF Mascot score: **[151]**      Sequence coverage %: **[8]**

Matched peptides No.: **[2]**      p value: **1.6e-008**

Calculated Mr: **35467**      Calculated pI: **5.12**

### Annotated PMF spectra:

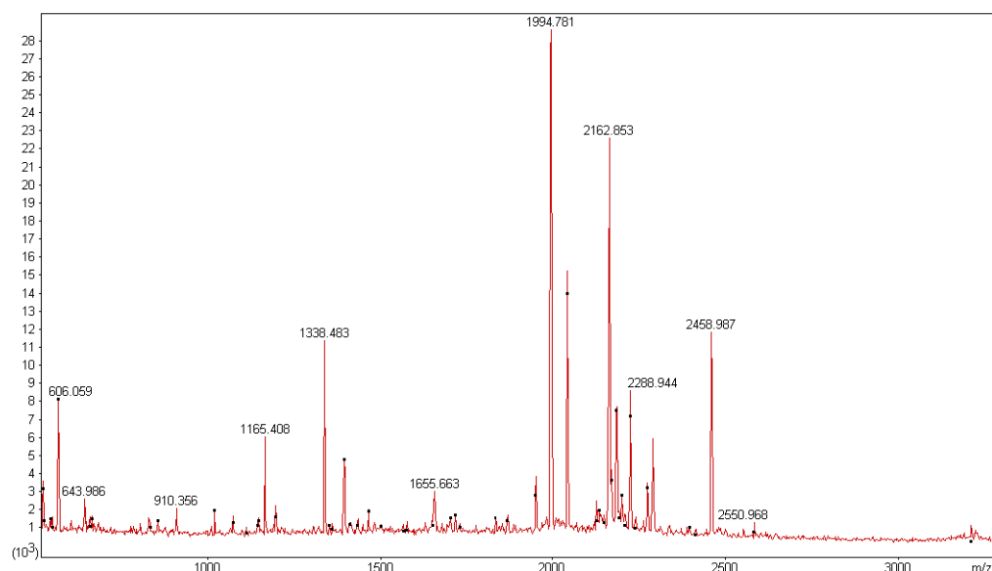

### PFF Searched Score:

Ions score is  $-10 \cdot \log(P)$ , where P is the probability that the observed match is a random event.  
Individual ions scores  $> 33$  indicate identity or extensive homology ( $p < 0.05$ ).  
Protein scores are derived from ions scores as a non-probabilistic basis for ranking protein hits.

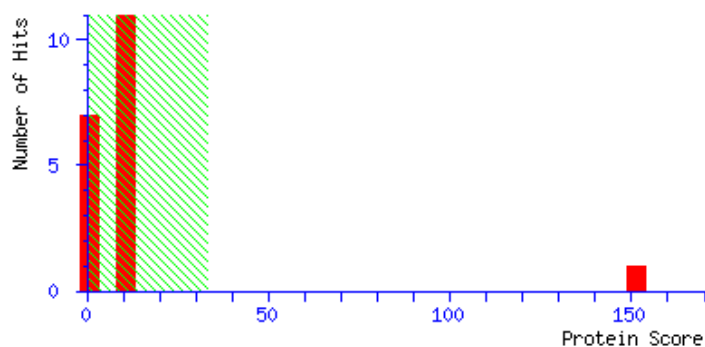

Spot No.: **46**

NCBI accession No.: *cassava4.1\_012448m*|PACid:17968446 Plant species:

***Manihot esculenta*** Protein name: **Putative NAD(P)H oxidoreductase, isoflavone reductase**

PFF Mascot score: **[254]** Sequence coverage %: **[15]**

Matched peptides No.: **[3]** p value: **4.7e-012**

Calculated Mr: 33873 Calculated pI: **5.47**

### Annotated PMF spectra:

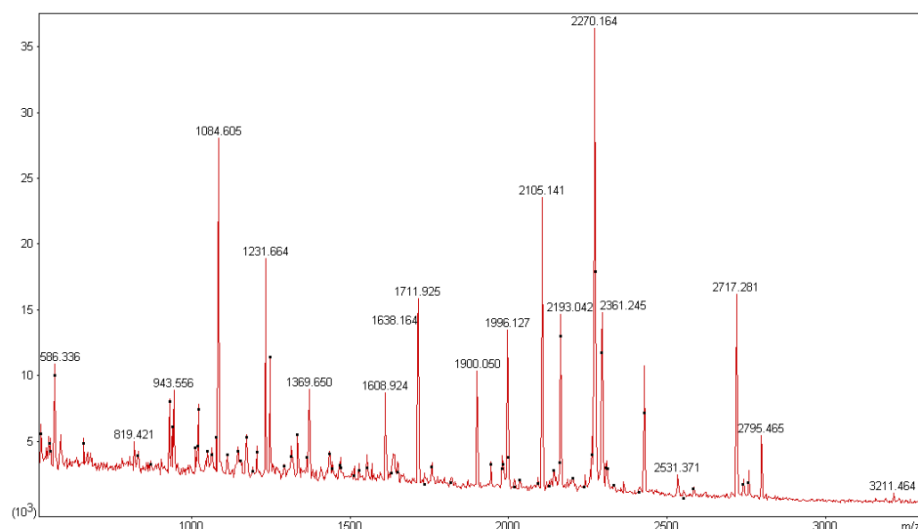

### PFF Searched Score:

Ions score is  $-10 \cdot \log(P)$ , where P is the probability that the observed match is a random event. Individual ions scores  $> 32$  indicate identity or extensive homology ( $p < 0.05$ ). Protein scores are derived from ions scores as a non-probabilistic basis for ranking protein hits.

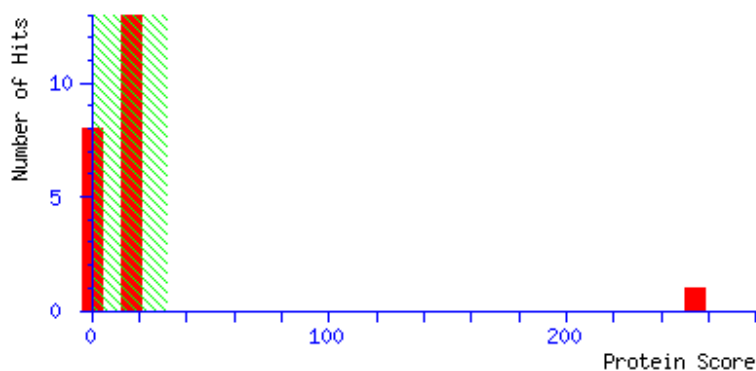

Spot No.: 47

NCBI accession No.: cassava4.1\_010620m|PACid:17987783

Plant species: *Manihot esculenta*

Protein name: Thiamine thiazole synthase, chloroplastic

PFF Mascot score: [133] Sequence coverage %: [8]

Matched peptides No.: [2] p value: 6.7e-006

Calculated Mr: 37625 Calculated pI: 6.07

### Annotated PMF spectra:

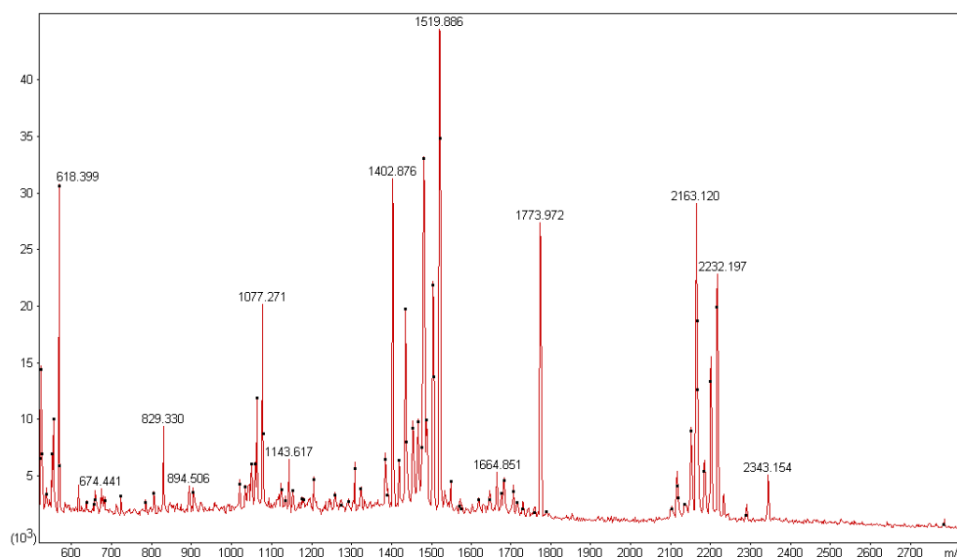

### PFF Searched Score:

Ions score is  $-10 \cdot \log(P)$ , where P is the probability that the observed match is a random event. Individual ions scores  $> 33$  indicate identity or extensive homology ( $p < 0.05$ ). Protein scores are derived from ions scores as a non-probabilistic basis for ranking protein hits.

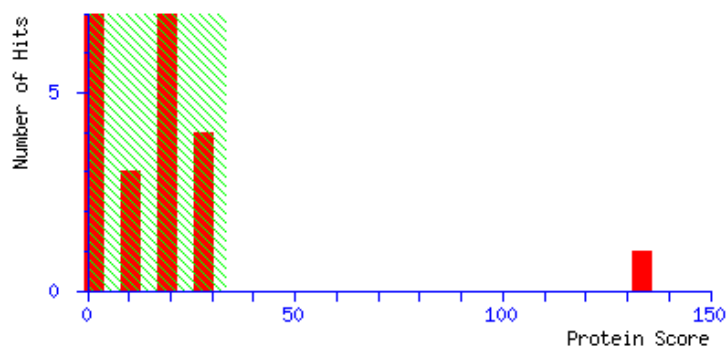

Spot No.: **48**

NCBI accession No.: *cassava4.1\_013135m*|PACid:17983192

Plant species: ***Manihot esculenta***

Protein name: **Alpha-soluble NSF attachment protein 2**

**PFF Mascot score: [209]      Sequence coverage %: [12]**

**Matched peptides No.: [3]      p value: 9.1e-007**

**Calculated Mr: 32780      Calculated pI: 5.13**

### **Annotated PMF spectra:**

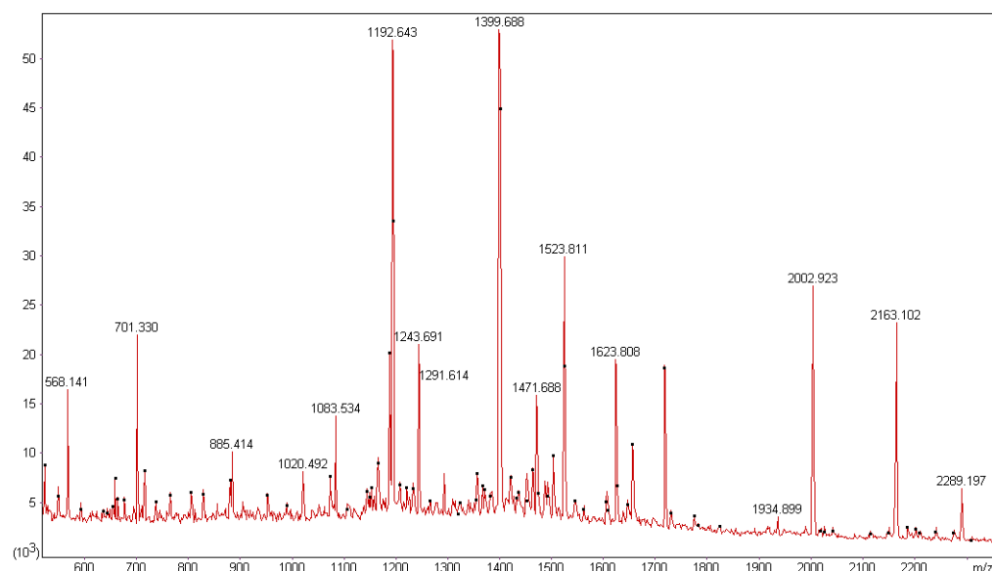

### **PFF Searched Score:**

Ions score is  $-10 \cdot \log(P)$ , where P is the probability that the observed match is a random event.

Individual ions scores  $> 34$  indicate identity or extensive homology ( $p < 0.05$ ).

Protein scores are derived from ions scores as a non-probabilistic basis for ranking protein hits.

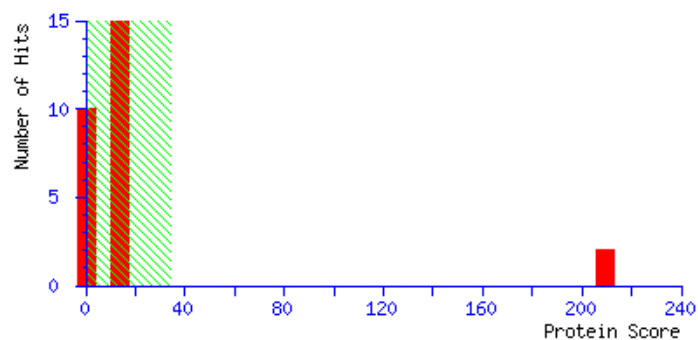

Spot No.: **49**

NCBI accession No.: **cassava4.1\_014185m|PACid:17964106**

Plant species: ***Manihot esculenta***

Protein name: **Ferritin-4, chloroplastic**

Mascot score: **125**

Sequence coverage %: **61**      p value: **2.3e-008**

Matched peptides No.: **18**                      Total peptides No.: **68**

Calculated Mr: **29470**                      Calculated pI: **5.30**

### Annotated PMF spectra:

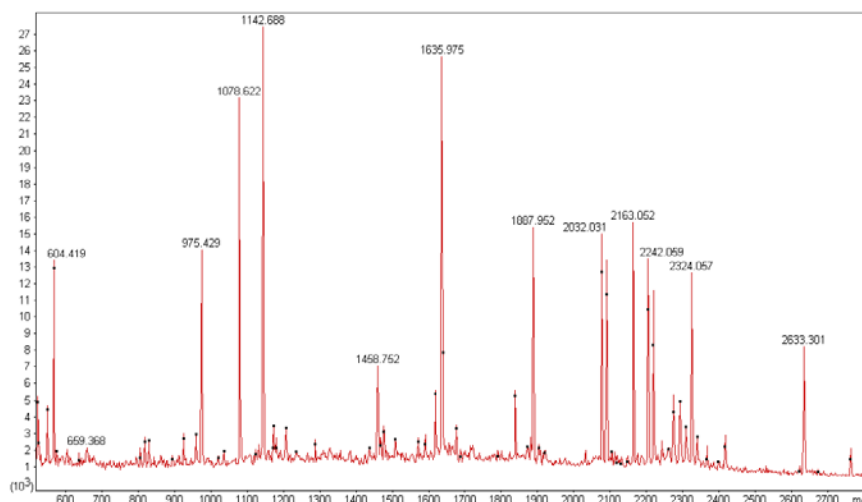

### Probability Based Mowse Score:

Protein score is  $-10 \cdot \log(P)$ , where P is the probability that the observed match is a random event. Protein scores greater than 61 are significant ( $p < 0.05$ ).

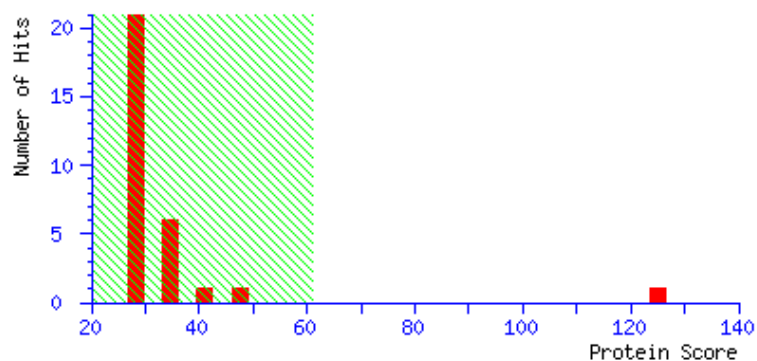

Spot No.: **50**

NCBI accession No.: *cassava4.1\_014410m*|PACid:17965277

Plant species: ***Manihot esculenta***

Protein name: **20 kDa chaperonin, chloroplastic**

PFF Mascot score: **[172]**      Sequence coverage %: **[21]**

Matched peptides No.: **[3]**      p value: **5e-005**

Calculated Mr: **26695**      Calculated pI: **7.79**

### Annotated PMF spectra:

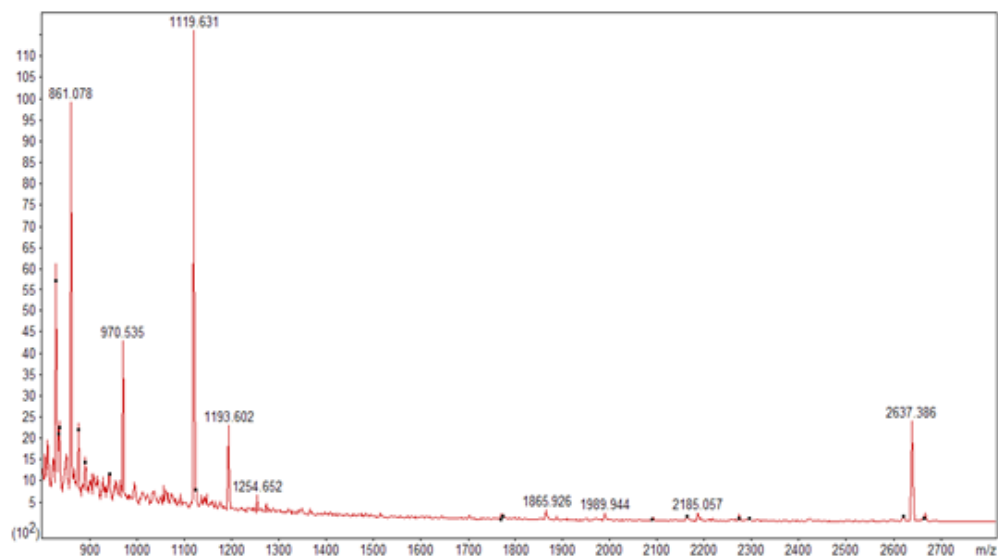

### PFF Searched Score:

Ions score is  $-10 \cdot \log(P)$ , where P is the probability that the observed match is a random event.

Individual ions scores  $> 33$  indicate identity or extensive homology ( $p < 0.05$ ).

Protein scores are derived from ions scores as a non-probabilistic basis for ranking protein hits.

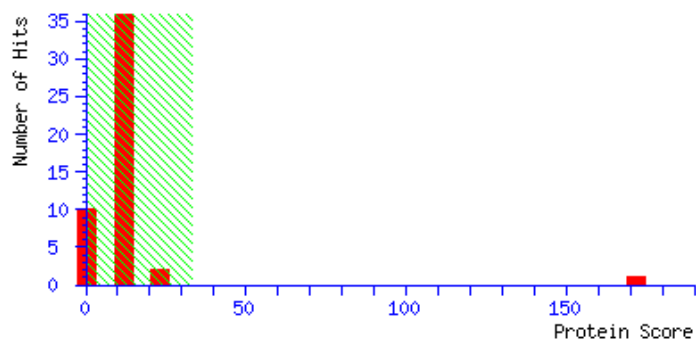



Spot No.: **51**

NCBI accession No.: *cassava4.1\_014643m|PACid:17991662*

Plant species: ***Manihot esculenta***

Protein name: **L-ascorbate peroxidase 1, cytosolic**

Mascot score: **82**      p value: 0.00046

Sequence coverage %: **40**      Matched peptides No.: **13**

Calculated Mr: **27766**      Calculated pI: **5.31**

### Annotated PMF spectra:

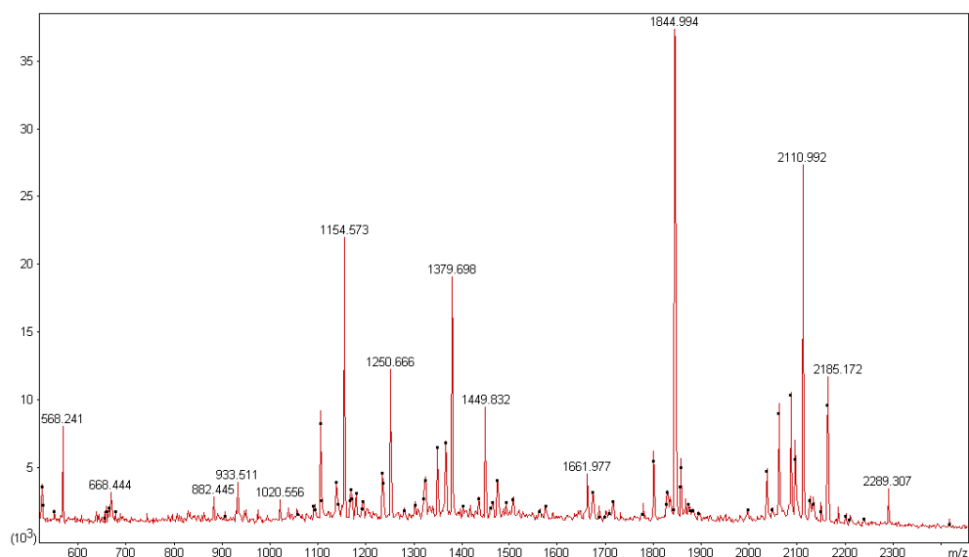

### Probability Based Mowse Score:

Protein score is  $-10 \cdot \log(P)$ , where P is the probability that the observed match is a random event. Protein scores greater than 61 are significant ( $p < 0.05$ ).

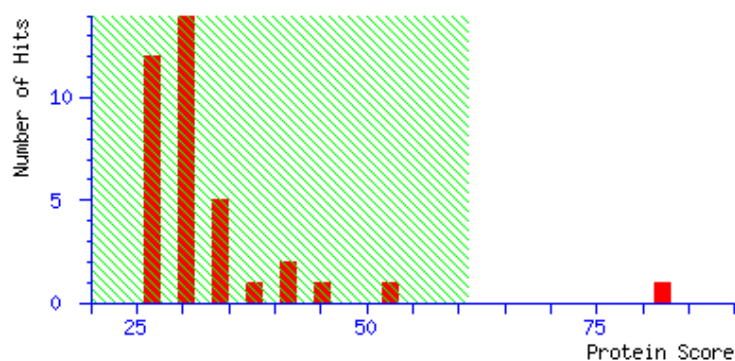

Spot No.: **52**

NCBI accession No.: *cassava4.1\_014643m*|PACid:17991662

Plant species: ***Manihot esculenta***

Protein name: **L-ascorbate peroxidase 1, cytosolic**

Mascot score: **133**      p value:  $3.7e-009$

Sequence coverage %: **50**

Matched peptides No.: **17**

Total peptides No.: **52**

Calculated Mr: **27766**

Calculated pI: **5.31**

### Annotated PMF spectra:

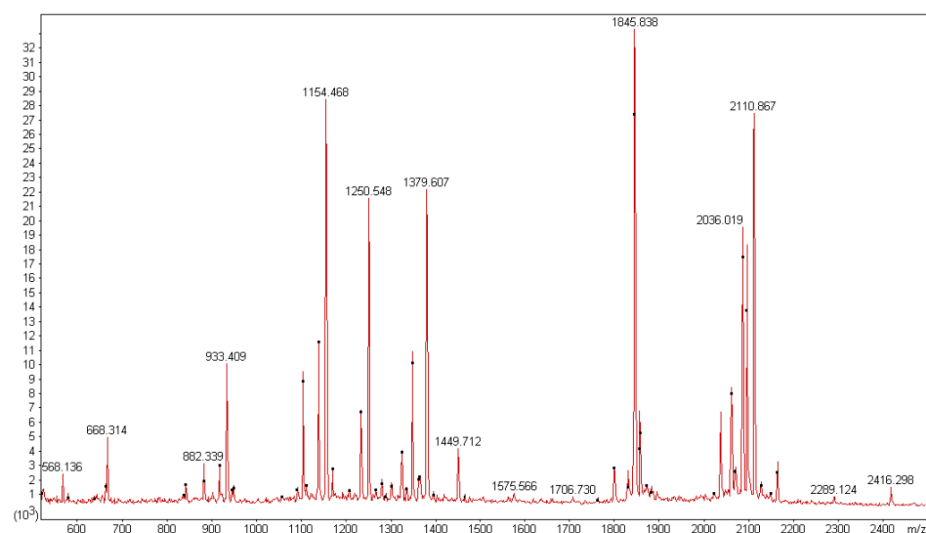

### Probability Based Mowse Score:

Protein score is  $-10 \cdot \log(P)$ , where P is the probability that the observed match is a random event. Protein scores greater than 61 are significant ( $p < 0.05$ ).

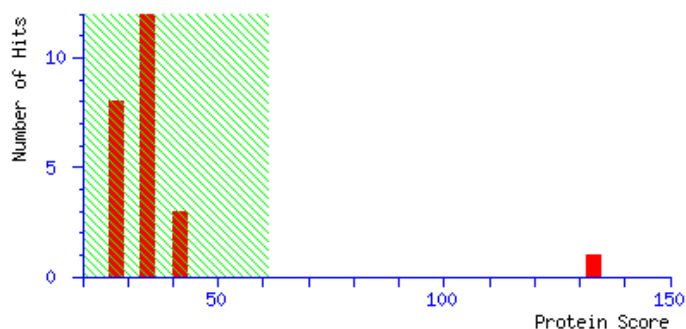



Spot No.: **53**

NCBI accession No.: *cassava4.1\_009779m*|PACid:17990964

Plant species: ***Manihot esculenta***

Protein name: **Actin-7**

**PFF Mascot score: [96]**

**Sequence coverage %: [7]**

Matched peptides No.: **[2]**

p value: **0.00065**

Calculated Mr: 41897

Calculated pI: **5.31**

### Annotated PMF spectra:

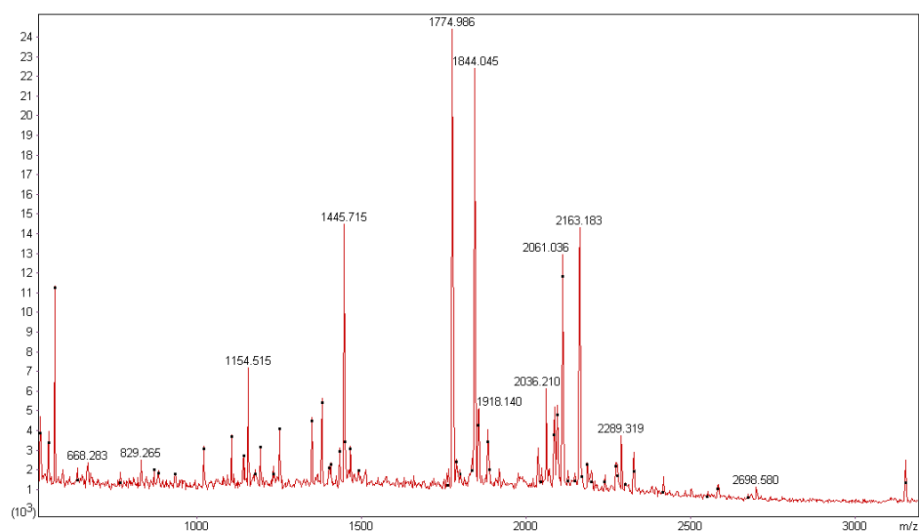

### PFF Searched Score:

Ions score is  $-10 \cdot \log(P)$ , where P is the probability that the observed match is a random event.

Individual ions scores  $> 33$  indicate identity or extensive homology ( $p < 0.05$ ).

Protein scores are derived from ions scores as a non-probabilistic basis for ranking protein hits.

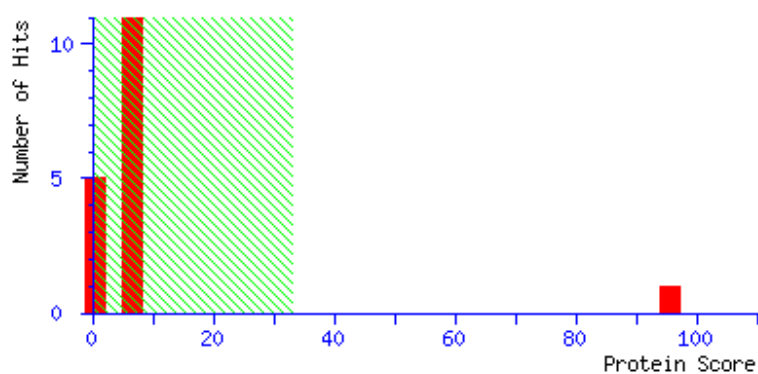

Spot No.: **54**

NCBI accession No.: *cassava4.1\_017771m*|PACid:17966880

Plant species: ***Manihot esculenta***

Protein name: **ATP synthase subunit d, mitochondrial**

Mascot score: **113**      p value:  $3.7e-007$

Sequence coverage %: **57**

Matched peptides No.: **13**

Total peptides No.: **39**

Calculated Mr: **19663**

Calculated pI: **5.11**

### Annotated PMF spectra:

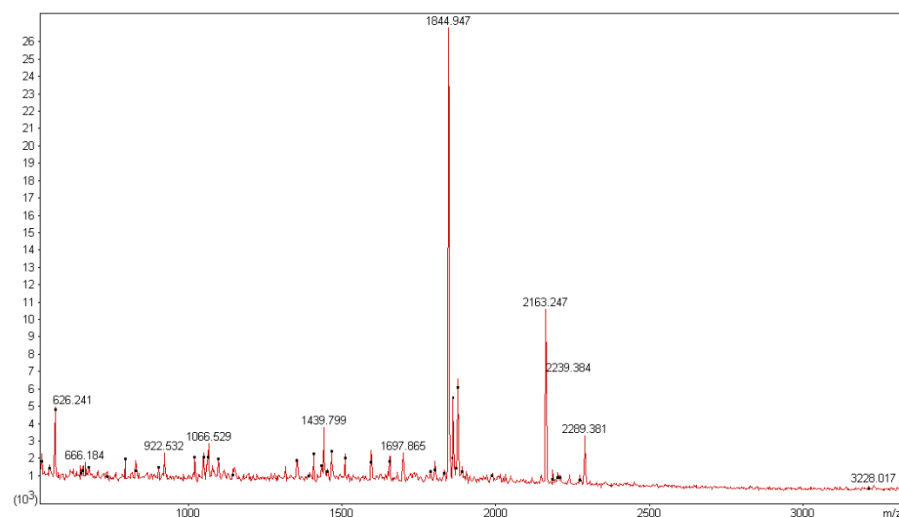

### Probability Based Mowse Score:

Protein score is  $-10 \cdot \log(P)$ , where P is the probability that the observed match is a random event. Protein scores greater than 61 are significant ( $p < 0.05$ ).

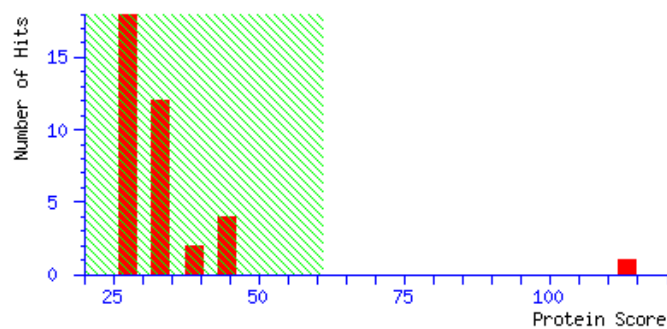

Spot No.: **55**

NCBI accession No.: *cassava4.1\_017771m|PACid:17966880*

Plant species: ***Manihot esculenta***

Protein name: **ATP synthase subunit d, mitochondrial**

Mascot score: **184**      p value:  $2.9e-014$

Sequence coverage %: **70**

Matched peptides No.: 19

Total peptides No.: **50**

Calculated Mr: **19663**

Calculated pI: **5.11**

### Annotated PMF spectra:

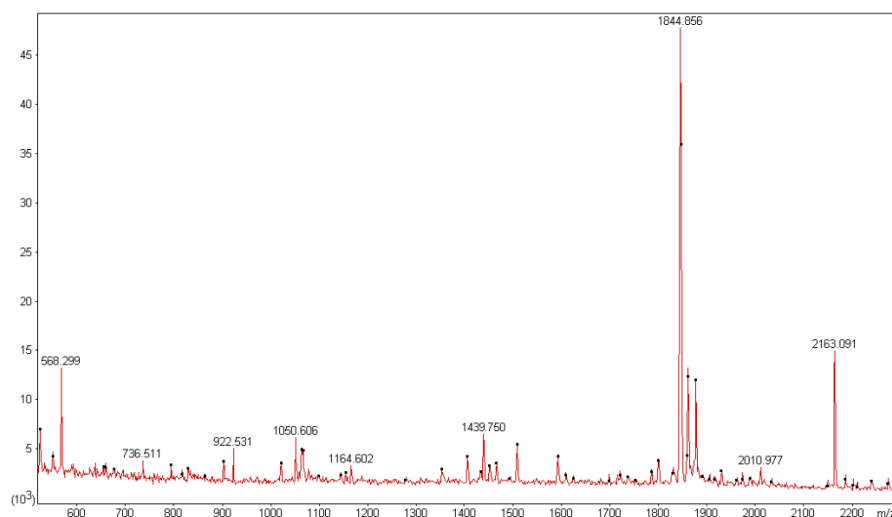

### Probability Based Mowse Score:

Protein score is  $-10 \cdot \log(P)$ , where P is the probability that the observed match is a random event. Protein scores greater than 61 are significant ( $p < 0.05$ ).

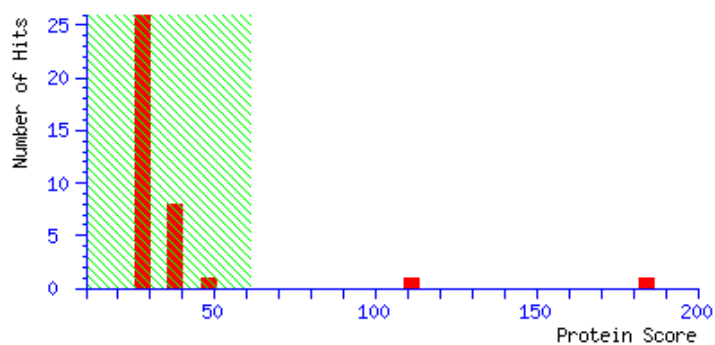

Spot No.: **56**

NCBI accession No.: **cassava4.1\_015349m|PACid:17959817**

Plant species: ***Manihot esculenta***

Protein name: **Proteasome subunit beta type**

**PFF Mascot score: [137]**

**Sequence coverage %: [11]**

**Matched peptides No.: [2]**

**p value: 9.5e-006**

**Calculated Mr: 24988**

**Calculated pI: 5.51**

### **Annotated PMF spectra:**

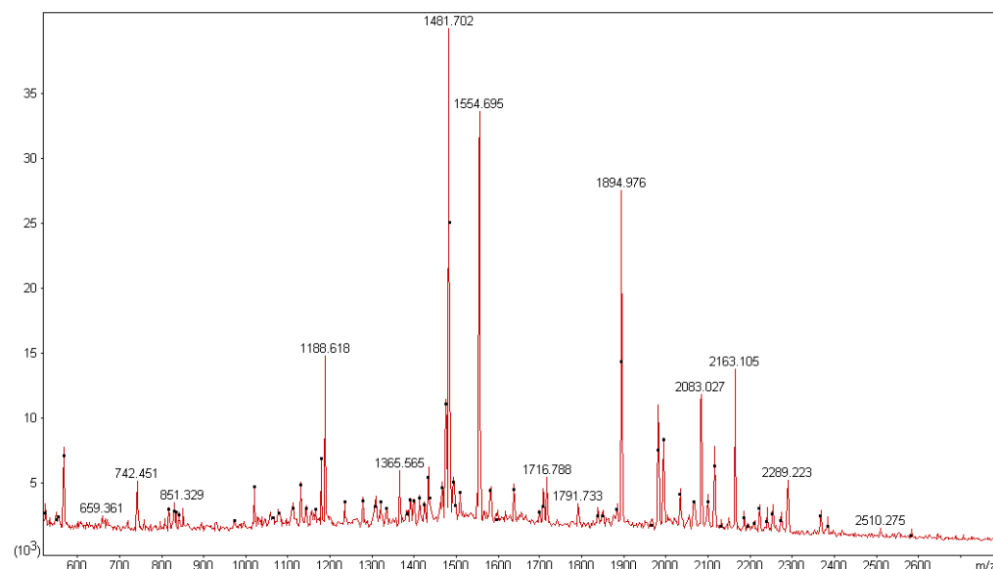

### **PFF Searched Score:**

Ions score is  $-10 \cdot \log(P)$ , where P is the probability that the observed match is a random event.

Individual ions scores  $> 33$  indicate identity or extensive homology ( $p < 0.05$ ).

Protein scores are derived from ions scores as a non-probabilistic basis for ranking protein hits.

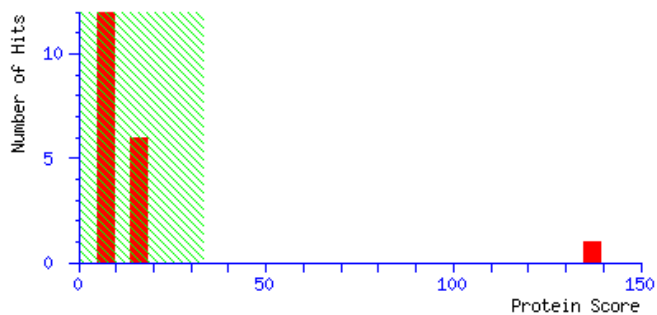

Spot No.: **57**

NCBI accession No.: **cassava4.1\_017832m|PACid:17961591**

Plant species: ***Manihot esculenta***

Protein name: **regulator of ribonuclease activity a**

**PFF Mascot score: [133] Sequence coverage %: [16]**

Matched peptides No.: **[2]** p value: **8.1e-007**

Calculated Mr: 18015

Calculated pI: **5.39**

### Annotated PMF spectra:

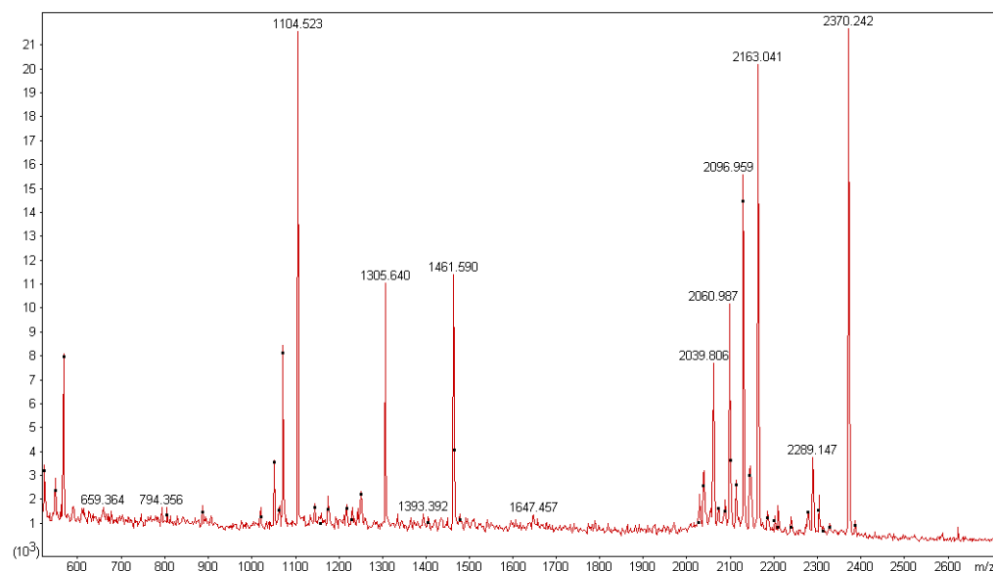

### PFF Searched Score:

Ions score is  $-10 \cdot \log(P)$ , where P is the probability that the observed match is a random event.

Individual ions scores  $> 33$  indicate identity or extensive homology ( $p < 0.05$ ).

Protein scores are derived from ions scores as a non-probabilistic basis for ranking protein hits.

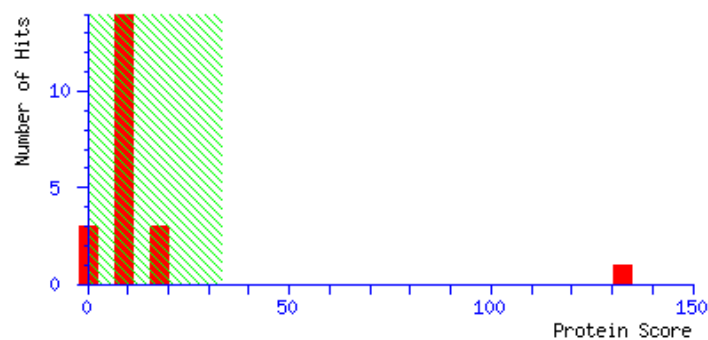



Spot No.: **58**

NCBI accession No.: *cassava4.1\_018059m*|PACid:17963195

Plant species: ***Manihot esculenta***

Protein name: **Eukaryotic translation initiation factor 5A-2**

**PFF Mascot score: [66]**

**Sequence coverage %: [18]**

Matched peptides No.: **[2]**

p value: **0.00026**

Calculated Mr: **17706**

Calculated pI: **5.60**

### **Annotated PMF spectra:**

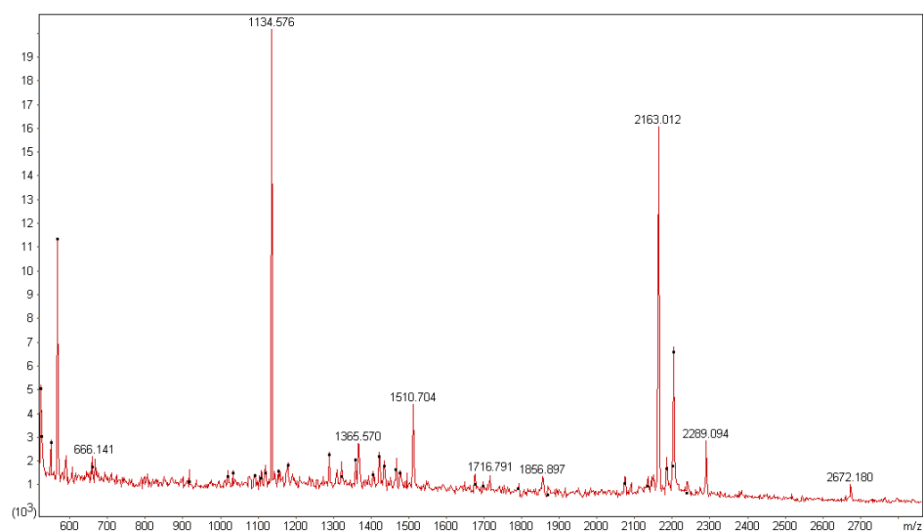

### **PFF Searched Score:**

Ions score is  $-10 \cdot \log(P)$ , where P is the probability that the observed match is a random event.

Individual ions scores  $> 33$  indicate identity or extensive homology ( $p < 0.05$ ).

Protein scores are derived from ions scores as a non-probabilistic basis for ranking protein hits.

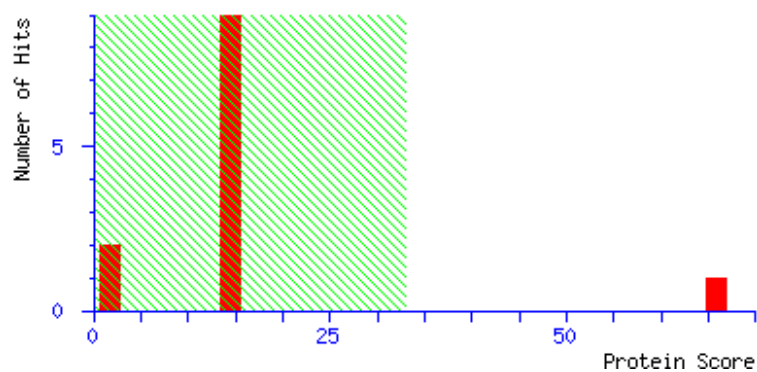

Spot No.: **59**

NCBI accession No.: **cassava4.1\_018026m|PACid:17990511**

Plant species: ***Manihot esculenta***

Protein name: **Eukaryotic translation initiation factor 5A-2**

Mascot score: **72** p value: **0.041**

Sequence coverage %: **44**

Matched peptides No.: **7** Total peptides No.: **33**

Calculated Mr: **17805** Calculated pI: **5.60**

### Annotated PMF spectra:

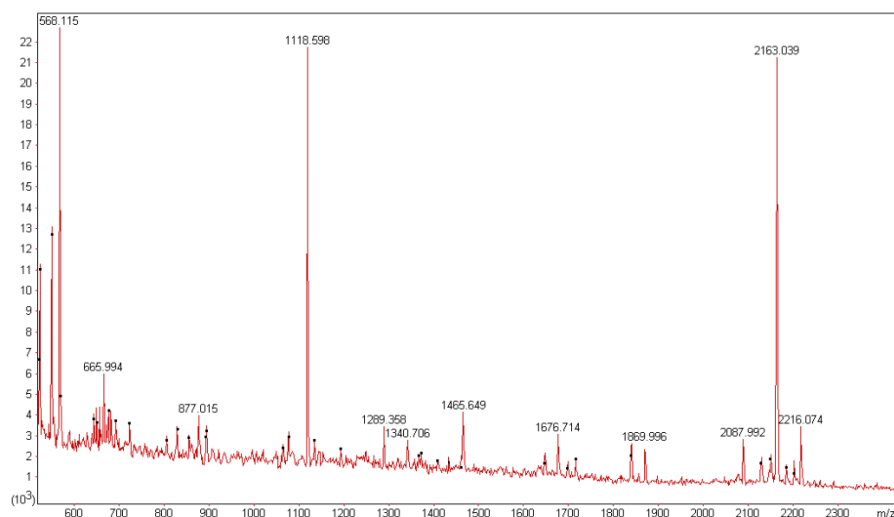

### Probability Based Mowse Score:

Protein score is  $-10 \cdot \log(P)$ , where P is the probability that the observed match is a random event. Protein scores greater than 61 are significant ( $p < 0.05$ ).

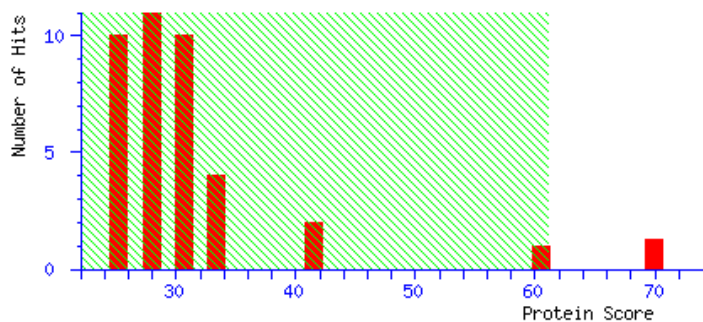

Spot No.: **60**

NCBI accession No.: *cassava4.1\_018158m*|PACid:17970560

Plant species: ***Manihot esculenta***

Protein name: **heat-shock protein, putative**

**PFF Mascot score: [196]**      **Sequence coverage %: [19]**

Matched peptides No.: [2]      p value: **4.4e-011**

Calculated Mr: **17672**      Calculated pI: **5.78**

### Annotated PMF spectra:

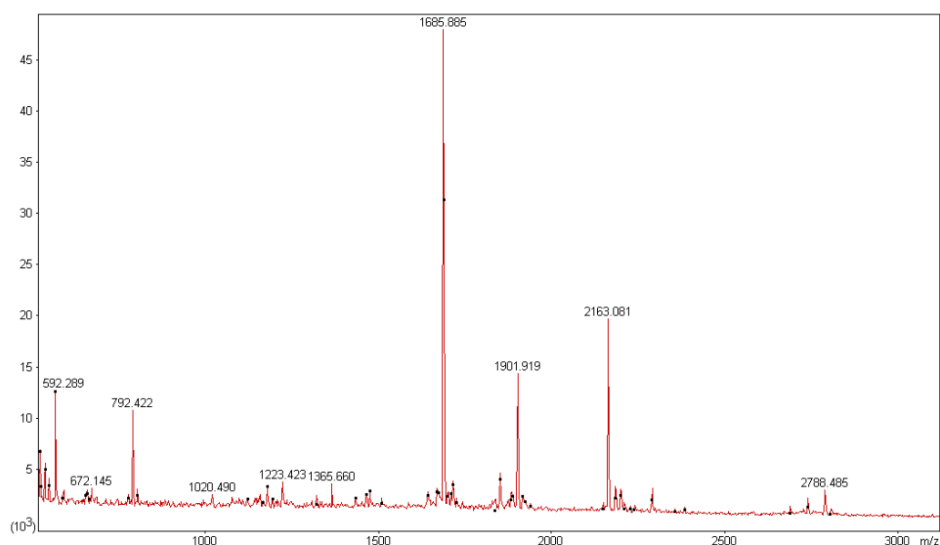

### PFF Searched Score:

Ions score is  $-10 \cdot \log(P)$ , where P is the probability that the observed match is a random event.

Individual ions scores  $> 32$  indicate identity or extensive homology ( $p < 0.05$ ).

Protein scores are derived from ions scores as a non-probabilistic basis for ranking protein hits.

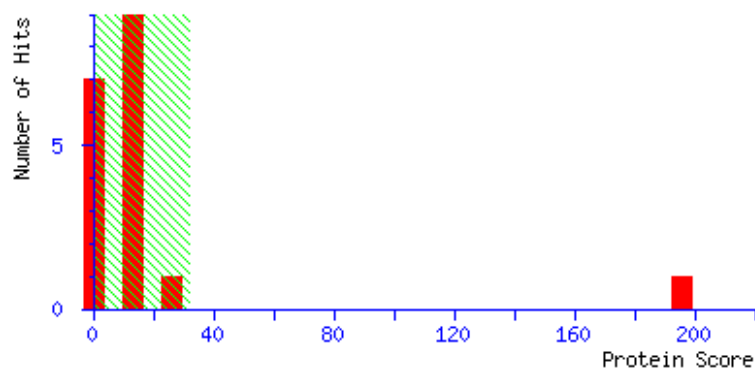

Spot No.: **61**

NCBI accession No.: **cassava4.1\_018737m|PACid:17986123**

Plant species: ***Manihot esculenta***

Protein name: **Actin-depolymerizing factor 3**

**PFF Mascot score: [112] Sequence coverage %: [11]**

Matched peptides No.: **[3]** p value: **5.3e-010**

Calculated Mr: **16253** Calculated pI: **6.60**

### Annotated PMF spectra:

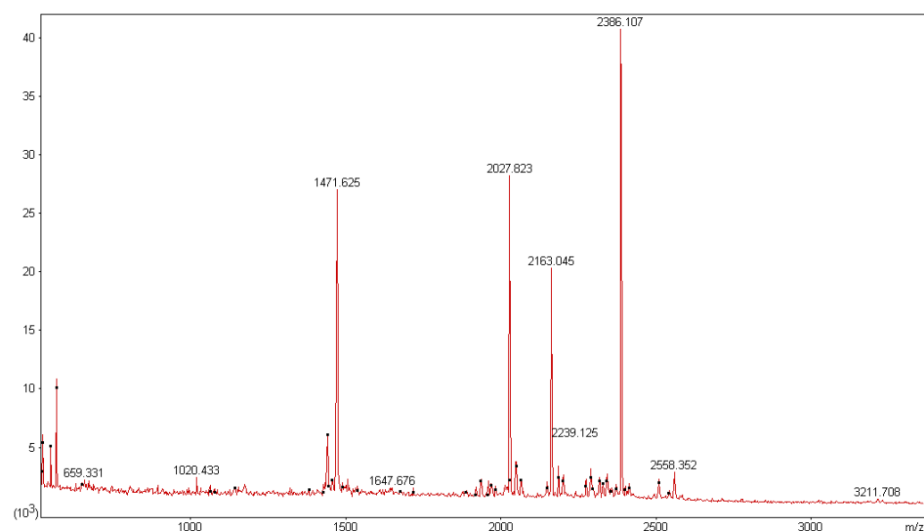

### PFF Searched Score:

Ions score is  $-10 \cdot \log(P)$ , where P is the probability that the observed match is a random event.

Individual ions scores  $> 32$  indicate identity or extensive homology ( $p < 0.05$ ).

Protein scores are derived from ions scores as a non-probabilistic basis for ranking protein hits.

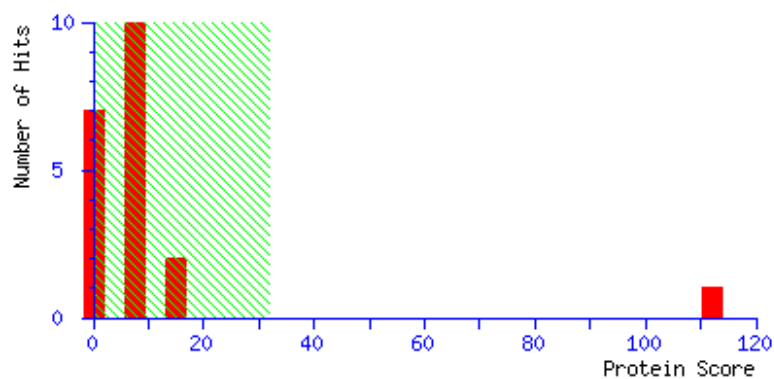

Spot No.: **62**

NCBI accession No.: *cassava4.1\_017871m*|PACid:17980723

Plant species: ***Manihot esculenta***

Protein name: **class I heat shock protein**

PFF Mascot score: **[95]**

Sequence coverage %: **[8]**

Matched peptides No.: **[2]**

p value: **3.7e-008**

Calculated Mr: 18750

Calculated pI: **7.93**

### Annotated PMF spectra:

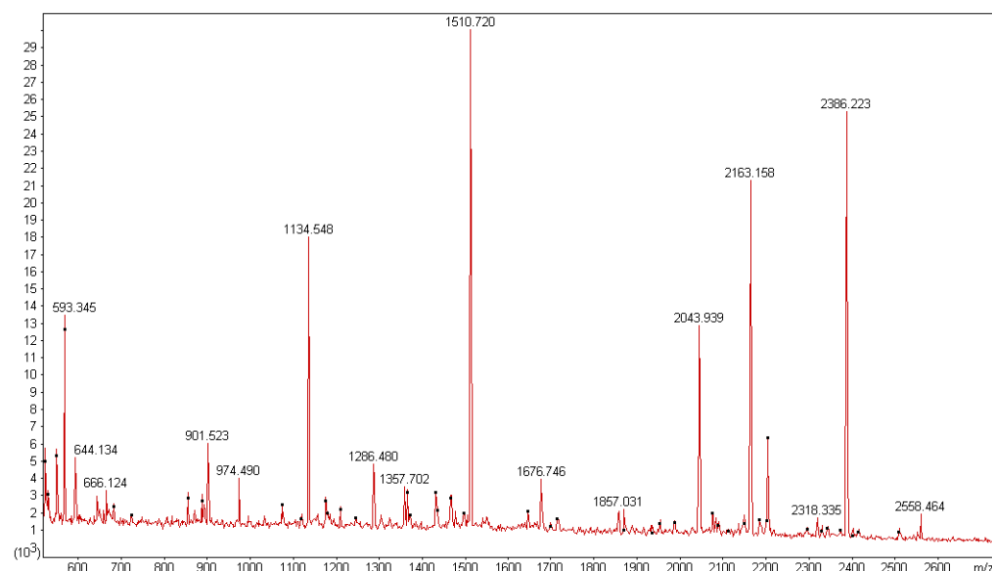

### PFF Searched Score:

Ions score is  $-10 \cdot \log(P)$ , where P is the probability that the observed match is a random event.

Individual ions scores  $> 33$  indicate identity or extensive homology ( $p < 0.05$ ).

Protein scores are derived from ions scores as a non-probabilistic basis for ranking protein hits.

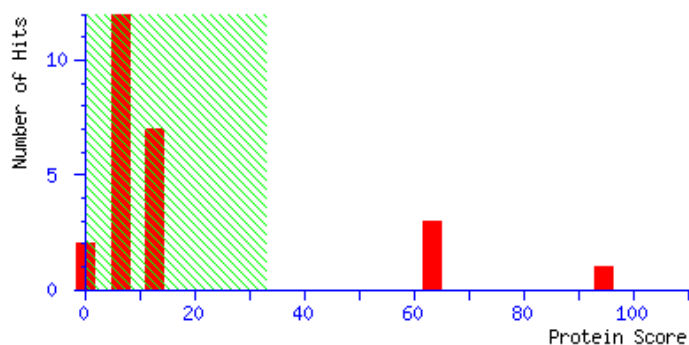

Spot No.: **63**

NCBI accession No.: *cassava4.1\_018026m*|PACid:17990511

Plant species: ***Manihot esculenta***

Protein name: **Eukaryotic translation initiation factor 5A-2**

Mascot score: **82**

Sequence coverage %: **73** p value: **0.00045**

Matched peptides No.: **11** Total peptides No.: **76**

Calculated Mr: **17805** Calculated pI: **5.60**

### Annotated PMF spectra:

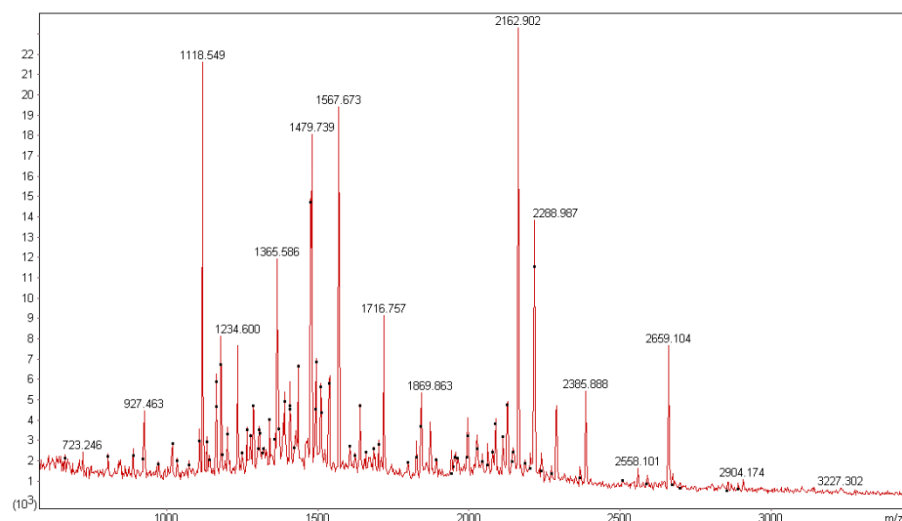

### Probability Based Mowse Score:

Protein score is  $-10 \cdot \log(P)$ , where P is the probability that the observed match is a random event. Protein scores greater than 61 are significant ( $p < 0.05$ ).

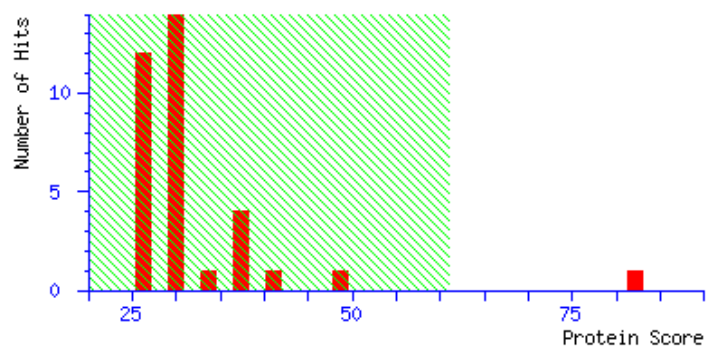

Spot No.: **64**

NCBI accession No.: *cassava4.1\_017973m*|PACid:17985926

Plant species: ***Manihot esculenta***

Protein name: **Peroxiredoxin-2B**

PFF Mascot score: [**180**]

Sequence coverage %: [**22**]

Matched peptides No.: [**10**]

p value: 2e-013

Calculated Mr: **17433**

Calculated pI: **5.70**

### Annotated PMF spectra:

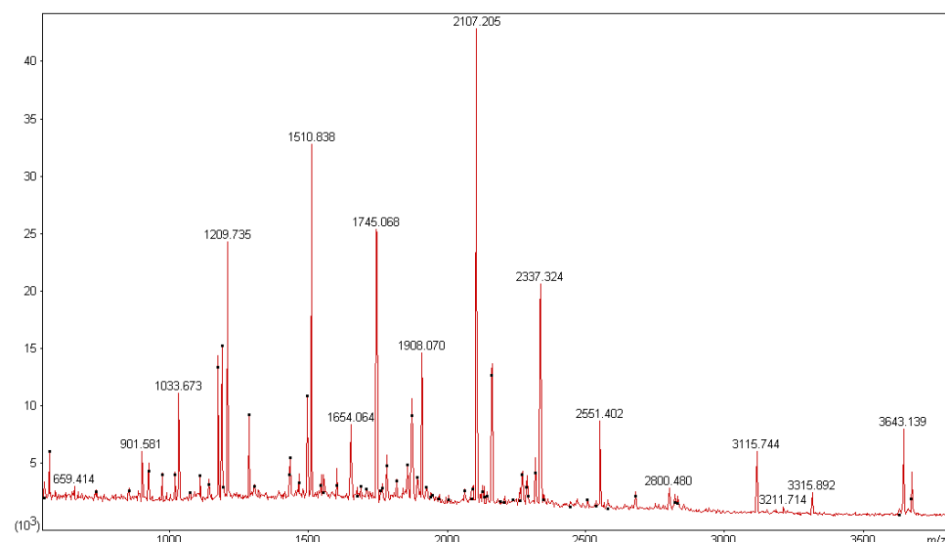

### PFF Searched Score:

Ions score is  $-10 \cdot \log(P)$ , where  $P$  is the probability that the observed match is a random event.

Individual ions scores  $> 32$  indicate identity or extensive homology ( $p < 0.05$ ).

Protein scores are derived from ions scores as a non-probabilistic basis for ranking protein hits.

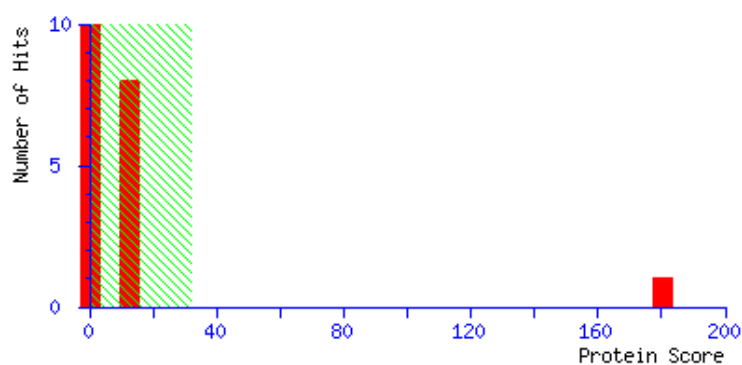

Spot No.: **65**

NCBI accession No.: *cassava4.1\_017871m|PACid:17980723*

Plant species: ***Manihot esculenta***

Protein name: **18.1 kDa class I heat shock protein**

PFF Mascot score: **[164]**      Sequence coverage %: **[25]**

Matched peptides No.: **[5]**      p value: **0.00017**

Calculated Mr: **18750**      Calculated pI: **7.93**

### Annotated PMF spectra:

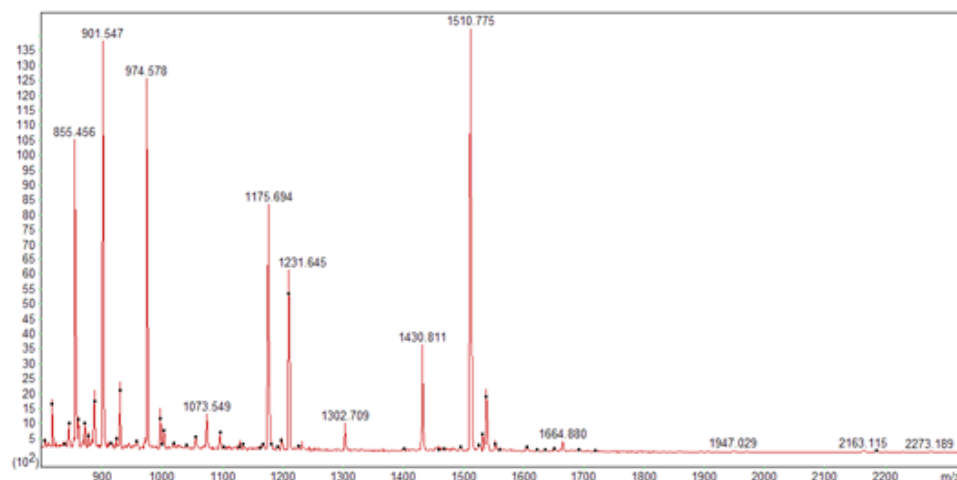

### PFF Searched Score:

Ions score is  $-10 \cdot \log(P)$ , where P is the probability that the observed match is a random event.

Individual ions scores  $> 34$  indicate identity or extensive homology ( $p < 0.05$ ).

Protein scores are derived from ions scores as a non-probabilistic basis for ranking protein hits.

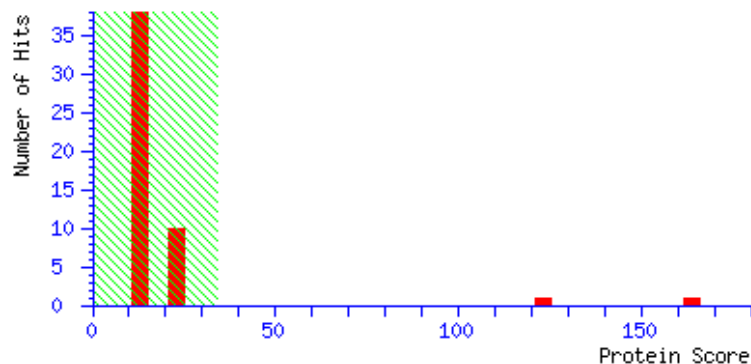



Spot No.: **66**

NCBI accession No.: **cassava4.1\_018294m|PACid:17966054**

Plant species: ***Manihot esculenta***

Protein name: **Superoxide dismutase [Cu-Zn] 1**

**PFF Mascot score: [80] Sequence coverage %: [8]**

Matched peptides No.: **[2]** p value: **1.3e-006**

Calculated Mr: **15416**

Calculated pI: **5.85**

### Annotated PMF spectra:

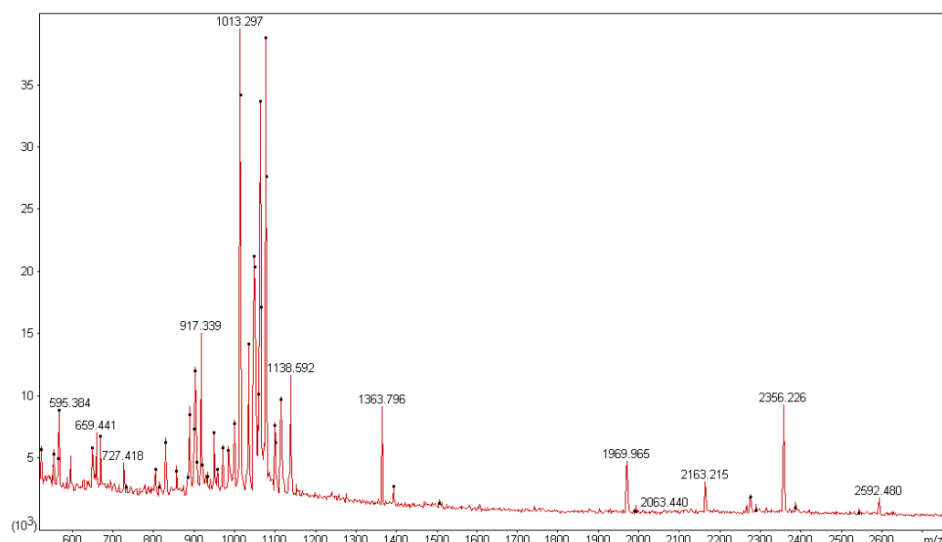

### PFF Searched Score:

Ions score is  $-10 \cdot \log(P)$ , where P is the probability that the observed match is a random event.

Individual ions scores  $> 33$  indicate identity or extensive homology ( $p < 0.05$ ).

Protein scores are derived from ions scores as a non-probabilistic basis for ranking protein hits.

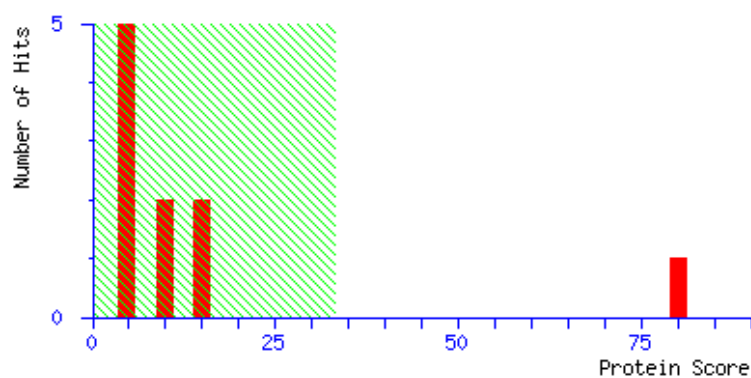

Spot No.: **67**

NCBI accession No.: **cassava4.1\_018422m|PACid:17961678**

Plant species: ***Manihot esculenta***

Protein name: **Actin-depolymerizing factor 3**

**PFF Mascot score: [147]**

**Sequence coverage %: [14]**

Matched peptides No.: **[3]**      p value: **1.5e-013**

Calculated Mr: **17512**      Calculated pI: **8.39**

**Annotated PMF spectra:**

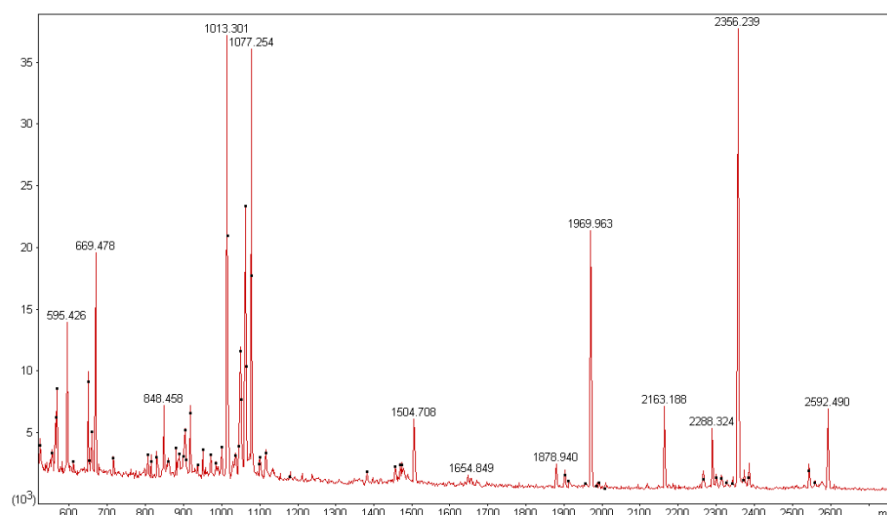

**PFF Searched Score:**

Ions score is  $-10 \cdot \log(P)$ , where P is the probability that the observed match is a random event. Individual ions scores  $> 33$  indicate identity or extensive homology ( $p < 0.05$ ). Protein scores are derived from ions scores as a non-probabilistic basis for ranking protein hits.

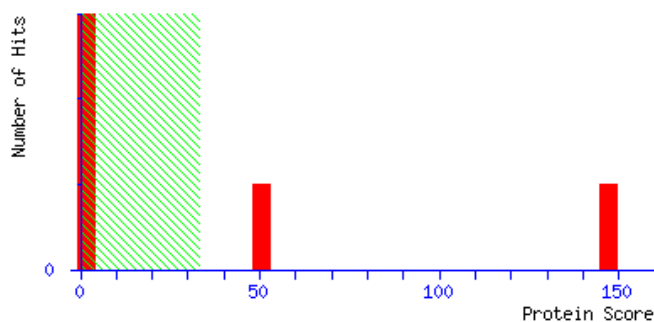

Spot No.: **68**

NCBI accession No.: *cassava4.1\_018338m*|PACid:17992346

Plant species: ***Manihot esculenta***

Protein name: **Ubiquitin-conjugating enzyme E2 variant 1C**

Mascot score: **119**

Sequence coverage %: **72**

p value:  $9.2e-008$

Matched peptides No.: **12**

Total peptides No.: **37**

Calculated Mr: **17236**

Calculated pI: **5.73**

### Annotated PMF spectra:

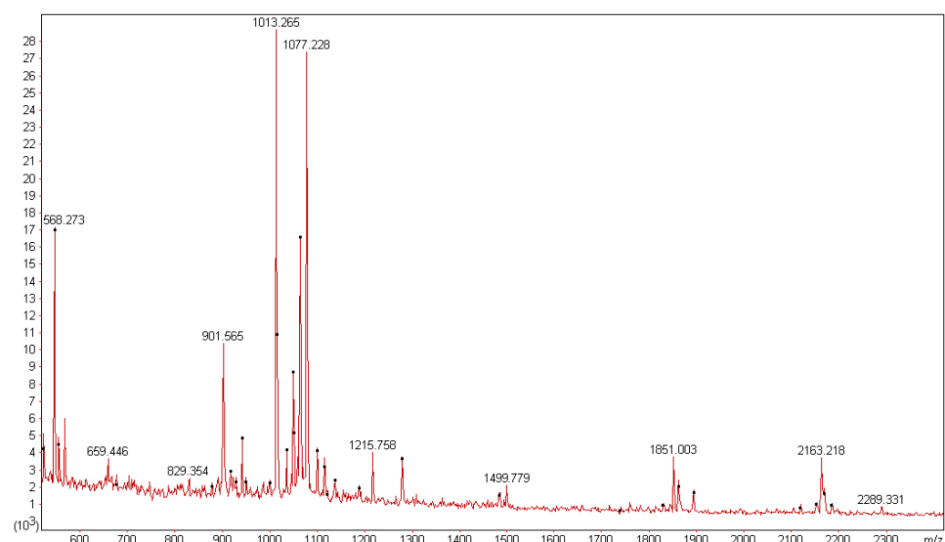

### Probability Based Mowse Score:

Protein score is  $-10 \cdot \log(P)$ , where P is the probability that the observed match is a random event. Protein scores greater than 61 are significant ( $p < 0.05$ ).

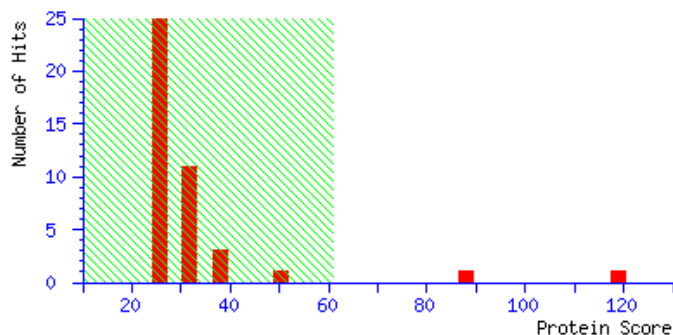

Spot No.: **69**

NCBI accession No.: *cassava4.1\_018010m*|PACid:17970081

Plant species: ***Manihot esculenta***

Protein name: **AT3g53990/F5K20\_290**

**PFF Mascot score: [195]      Sequence coverage %: [21]**

Matched peptides No.: **[3]**      p value: **5.2e-006**

Calculated Mr: **18044**      Calculated pI: **6.14**

### Annotated PMF spectra:

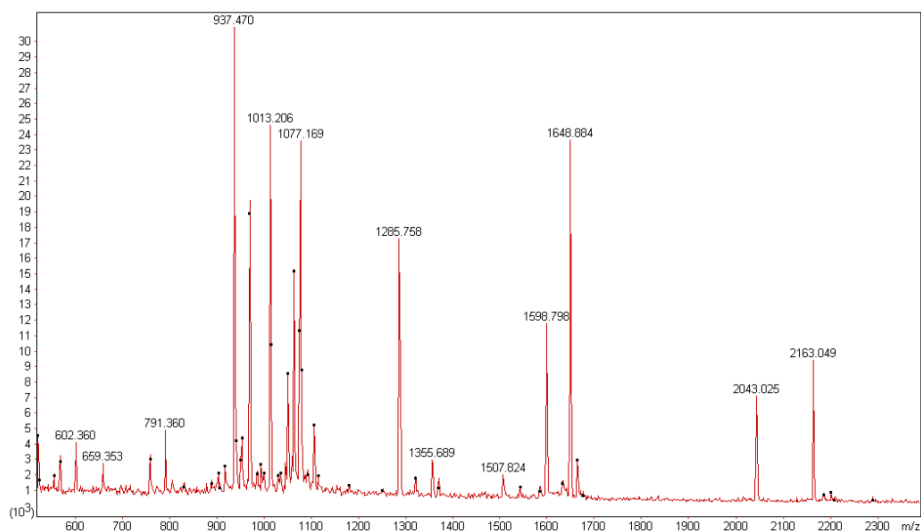

### PFF Searched Score:

Ions score is  $-10 \cdot \log(P)$ , where P is the probability that the observed match is a random event.

Individual ions scores  $> 33$  indicate identity or extensive homology ( $p < 0.05$ ).

Protein scores are derived from ions scores as a non-probabilistic basis for ranking protein hits.

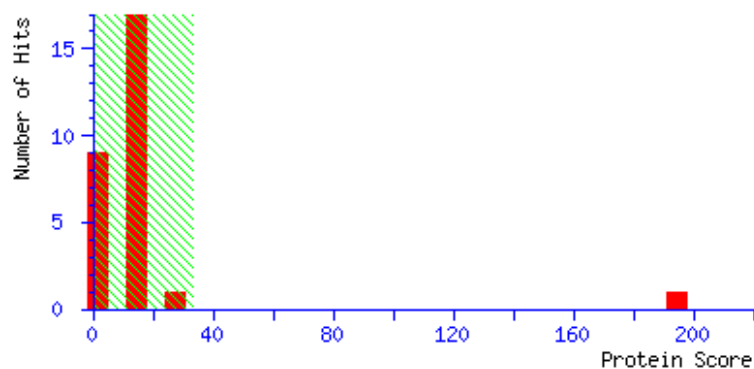

Spot No.: **70**

NCBI accession No.: *cassava4.1\_015272m*|PACid:17960181

Plant species: ***Manihot esculenta***

Protein name: **Superoxide dismutase [Mn] 1, mitochondrial**

Mascot score: **139**

Sequence coverage %: **54**    p value:  $9.2e-010$

Matched peptides No.: **16**                      Total peptides No.:**67**

Calculated Mr: **25905**                      Calculated pI: **7.82**

### Annotated PMF spectra:

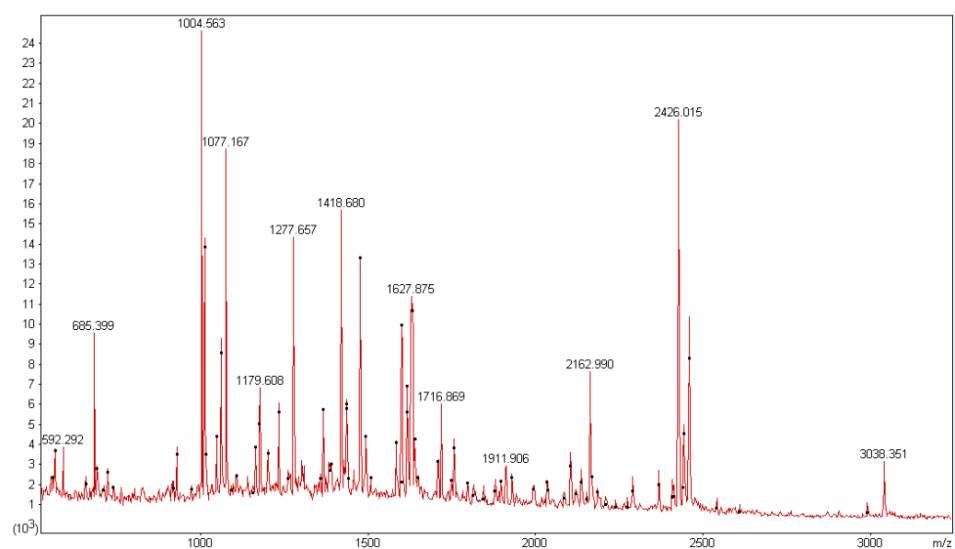

### Probability Based Mowse Score:

Protein score is  $-10 \cdot \log(P)$ , where P is the probability that the observed match is a random event. Protein scores greater than 61 are significant ( $p < 0.05$ ).

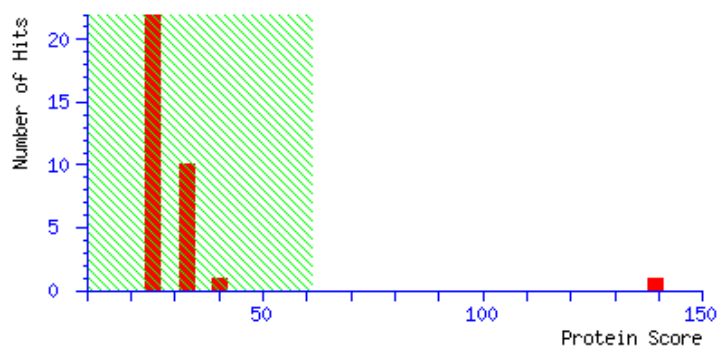

Spot No.: 71

NCBI accession No.: cassava4.1\_013840m|PACid:17968262

Plant species: *Manihot esculenta*

Protein name: **Proteasome subunit alpha type-2-A**

PFF Mascot score: [99]

Sequence coverage %: [7]

Matched peptides No.: [2]

p value: **0.0001**

Calculated Mr: **29845**

Calculated pI: **6.13**

### Annotated PMF spectra:

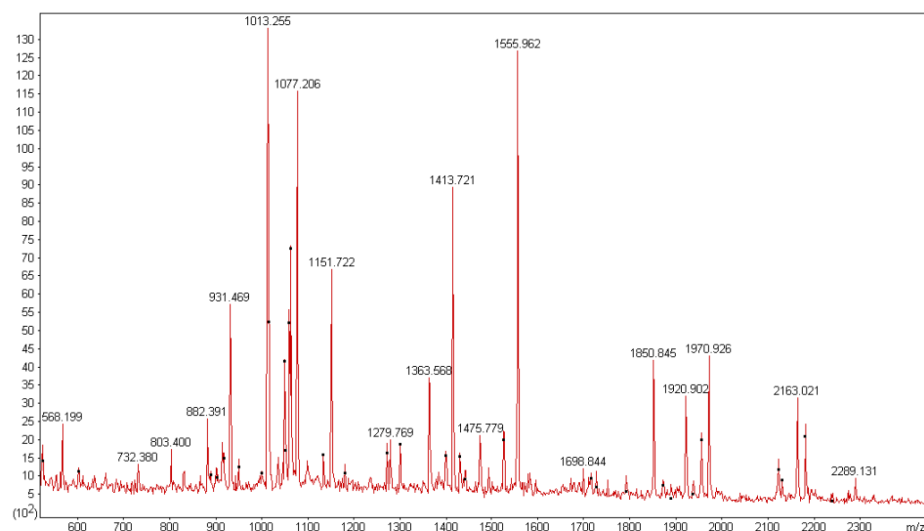

### PFF Searched Score:

Ions score is  $-10 \cdot \log(P)$ , where P is the probability that the observed match is a random event.

Individual ions scores  $> 33$  indicate identity or extensive homology ( $p < 0.05$ ).

Protein scores are derived from ions scores as a non-probabilistic basis for ranking protein hits.

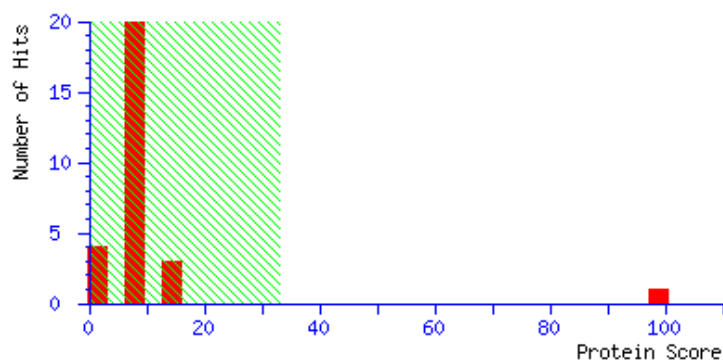

Spot No.: **72**

NCBI accession No.: **cassava4.1\_013784m|PACid:17965032**

Plant species: ***Manihot esculenta***

Protein name: **Superoxide dismutase [Fe] 2, chloroplastic**

**PFF Mascot score: [94]      Sequence coverage %: [11]**

**Matched peptides No.: [3]      p value: 0.0079**

**Calculated Mr: 30888      Calculated pI: 6.67**

### **Annotated PMF spectra:**

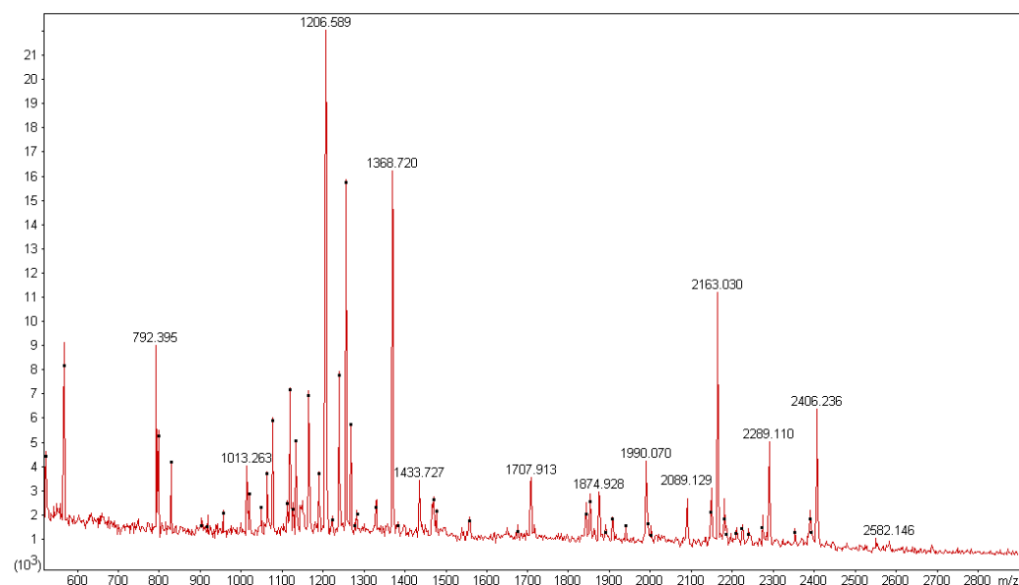

### **PFF Searched Score:**

Ions score is  $-10 \cdot \log(P)$ , where P is the probability that the observed match is a random event.

Individual ions scores  $> 34$  indicate identity or extensive homology ( $p < 0.05$ ).

Protein scores are derived from ions scores as a non-probabilistic basis for ranking protein hits.

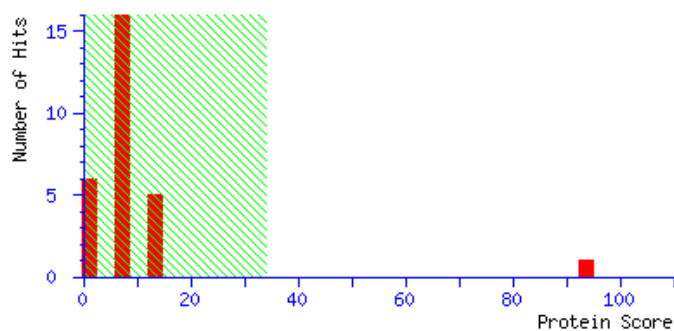

Spot No.: **73**

NCBI accession No.: **cassava4.1\_014423m|PACid:17980868**

Plant species: ***Manihot esculenta***

Protein name: **L-ascorbate peroxidase 1, cytosolic**

**PFF Mascot score: [234]**

**Sequence coverage %: [17]**

**Matched peptides No.: [3]**

**p value: 1.1e-010**

**Calculated Mr: 28235**

**Calculated pI: 6.09**

### **Annotated PMF spectra:**

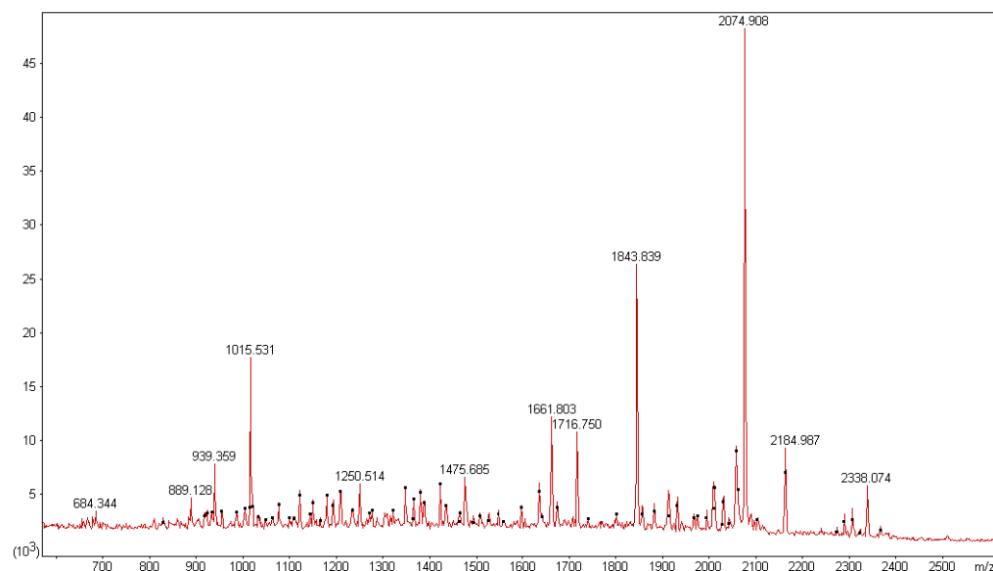

### **PFF Searched Score:**

Ions score is  $-10 \cdot \log(P)$ , where P is the probability that the observed match is a random event.

Individual ions scores  $> 33$  indicate identity or extensive homology ( $p < 0.05$ ).

Protein scores are derived from ions scores as a non-probabilistic basis for ranking protein hits.

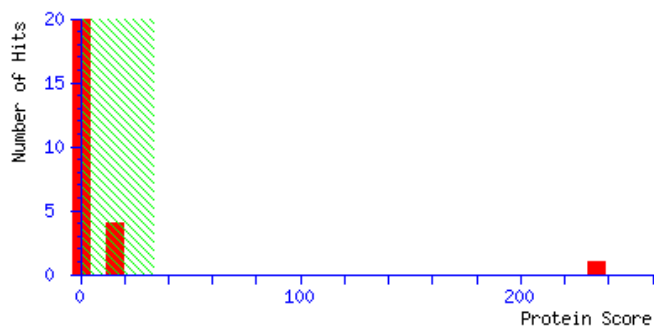



Spot No.: **74**

NCBI accession No.: **cassava4.1\_014432m|PACid:17967798**

Plant species: ***Manihot esculenta***

Protein name: **Triosephosphate isomerase, cytosolic**

**PFF Mascot score: [194]      Sequence coverage %: [16]**

Matched peptides No.: **[3]**                      p value: **9.9e-006**

Calculated Mr: **27729**                      Calculated pI: **5.77**

**Annotated PMF spectra:**

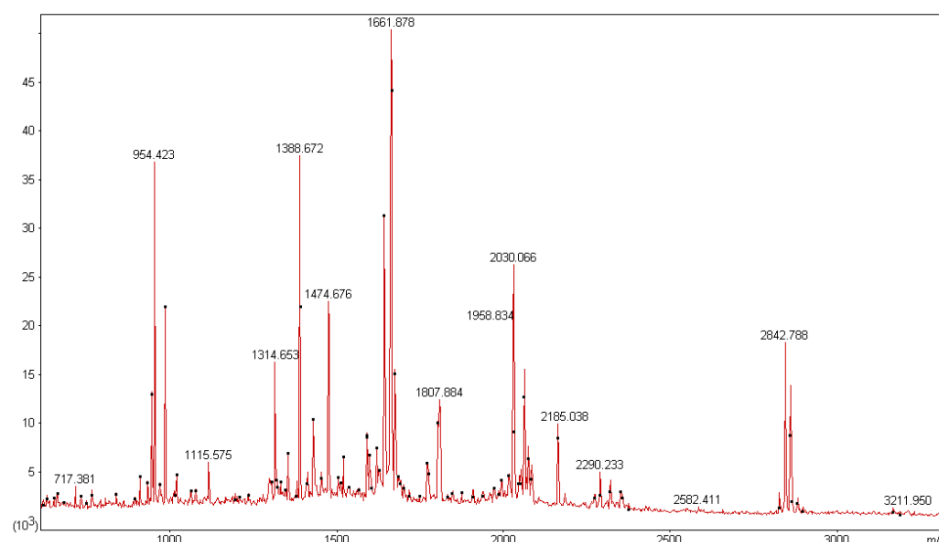

**PFF Searched Score:**

Ions score is  $-10 \cdot \log(P)$ , where P is the probability that the observed match is a random event.

Individual ions scores  $> 33$  indicate identity or extensive homology ( $p < 0.05$ ).

Protein scores are derived from ions scores as a non-probabilistic basis for ranking protein hits.

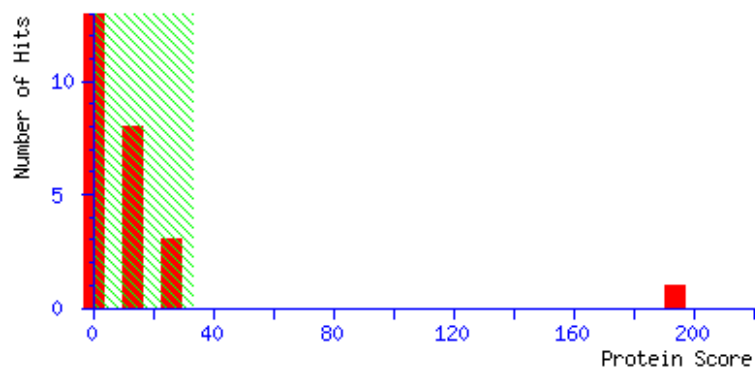

Spot No.: **75**

NCBI accession No.: *cassava4.1\_014799m*|PACid:17972994

Plant species: ***Manihot esculenta***

Protein name: **Proteasome subunit alpha type-6-A**

Mascot score: **131**

Sequence coverage %: **52**      p value:  $5.8e-009$

Matched peptides No.: **14**      Total peptides No.: **35**

Calculated Mr: **27642**      Calculated pI: **6.19**

### Annotated PMF spectra:

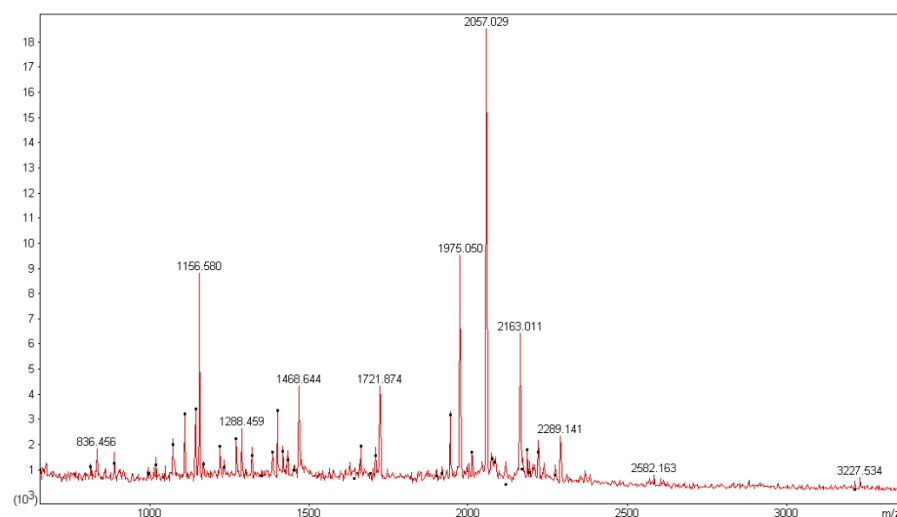

### Probability Based Mowse Score:

Protein score is  $-10 \cdot \log(P)$ , where P is the probability that the observed match is a random event. Protein scores greater than 61 are significant ( $p < 0.05$ ).

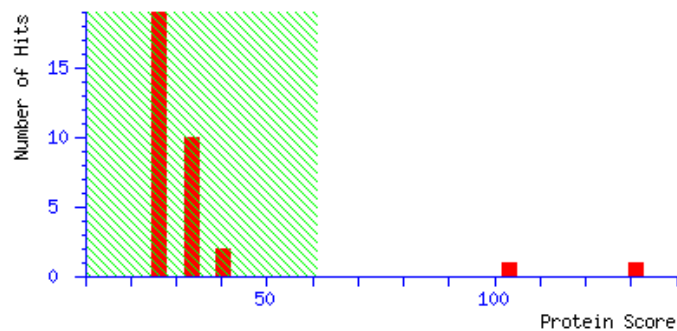

Spot No.: **76**

NCBI accession No.: *cassava4.1\_010620m*[PACid:17987783

Plant species *Manihot esculenta*

Protein name: **Thiamine thiazole synthase, chloroplastic**

**PFF Mascot score: [162]      Sequence coverage %: [8]**

Matched peptides No.: **[2]**                      p value: **1.8e-007**

Calculated Mr: 37625                      Calculated *pI*: **6.07**

### Annotated PMF spectra:

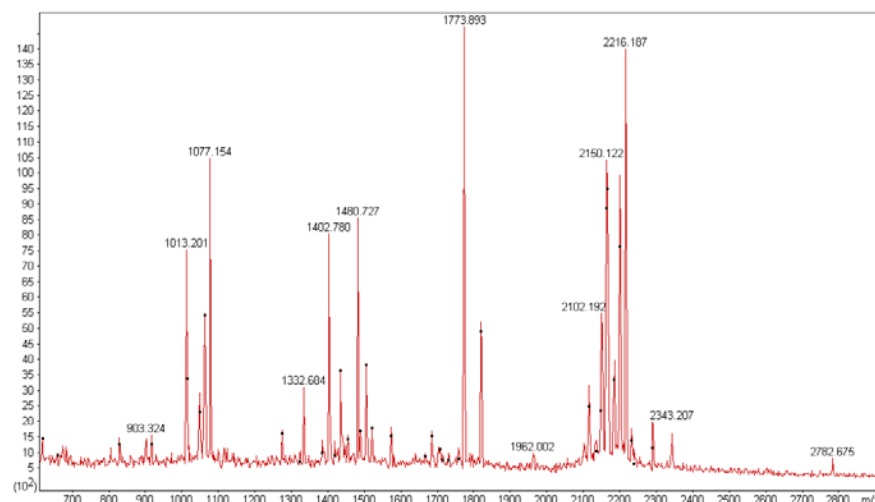

### Probability Based Mowse Score:

Ions score is  $-10 \cdot \log(P)$ , where *P* is the probability that the observed match is a random event.

Individual ions scores > 33 indicate identity or extensive homology ( $p < 0.05$ ).

Protein scores are derived from ions scores as a non-probabilistic basis for ranking protein hits.

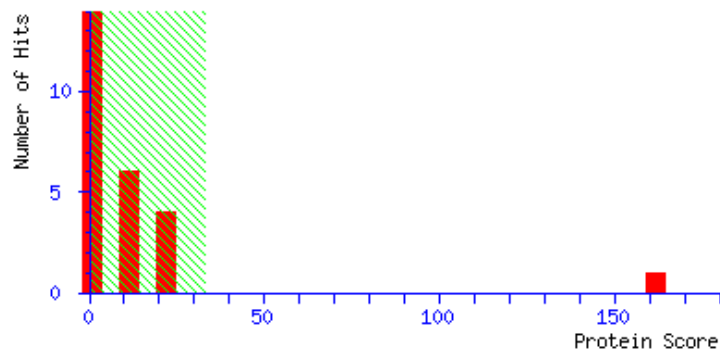

Spot No.: 77

NCBI accession No.: *cassava4.1\_010971m*|PACid:17987784

Plant species: *Manihot esculenta*

Protein name: **Thiamine thiazole synthase, chloroplastic**

Mascot score: **88**

Sequence coverage %: **38**      p value: 0.00011

Matched peptides No.: **17**      Total peptides No.: **70**

Calculated Mr: **36908**      Calculated pI: **7.10**

### Annotated PMF spectra:

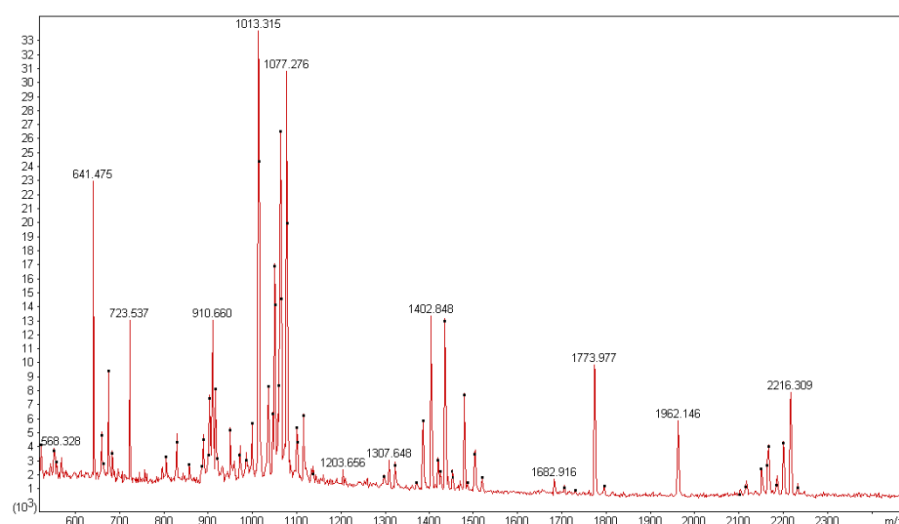

### Probability Based Mowse Score:

Protein score is  $-10 \cdot \log(P)$ , where P is the probability that the observed match is a random event. Protein scores greater than 61 are significant ( $p < 0.05$ ).

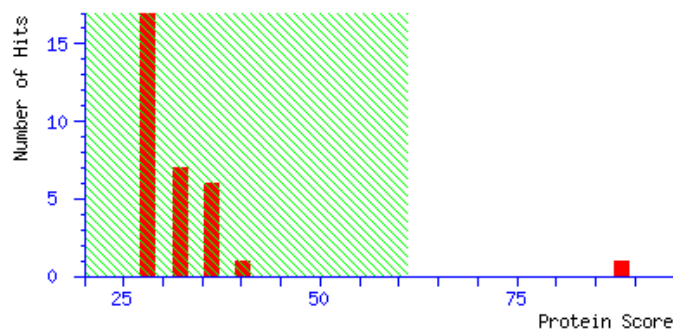

Spot No.: **78**

NCBI accession No.: *cassava4.1\_009245m*|PACid:17963775

Plant species: ***Manihot esculenta***

Protein name: **S-adenosylmethionine synthase 1**

Mascot score: **119**

Sequence coverage %: **55**      p value:  $9.2e-008$

Matched peptides No.: **16**      Total peptides No.: **54**

Calculated Mr: **43709**      Calculated pI: **5.68**

### Annotated PMF spectra:

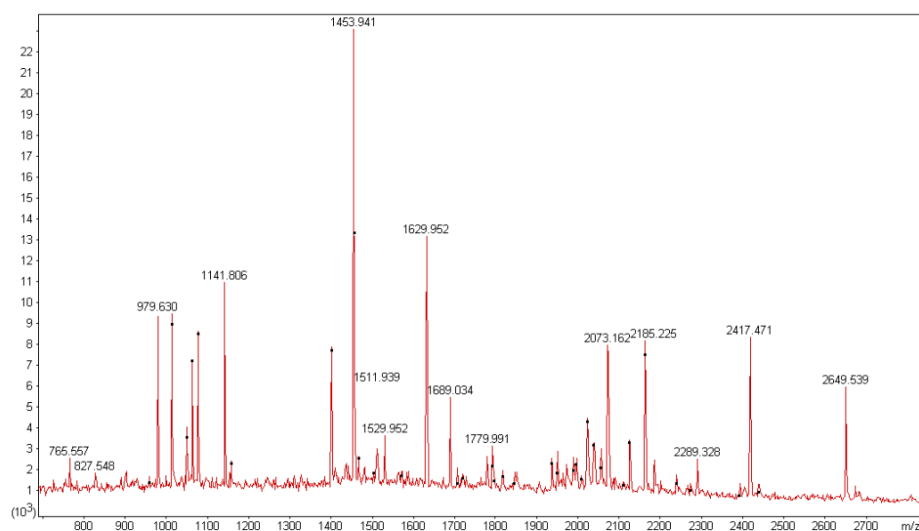

### Probability Based Mowse Score:

Protein score is  $-10 \cdot \log(P)$ , where P is the probability that the observed match is a random event. Protein scores greater than 61 are significant ( $p < 0.05$ ).

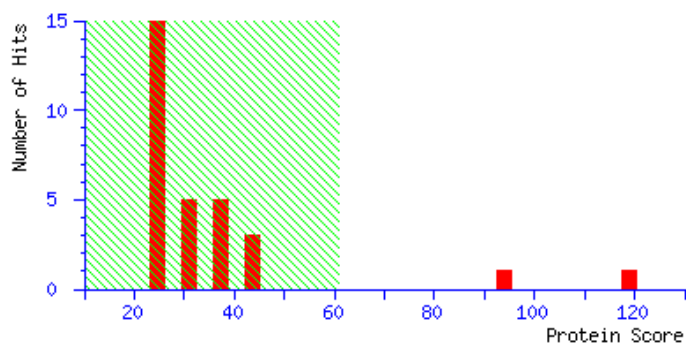

Spot No.: **79**

NCBI accession No.: **cassava4.1\_011550m|PACid:17993466**

Plant species: ***Manihot esculenta***

Protein name: **predicted protein** Mascot score: **108**

Sequence coverage %: **50** p value: **1.2e-006**

Matched peptides No.: **17** Total peptides No.: **67**

Calculated Mr: **36178** Calculated pI: **6.09**

### Annotated PMF spectra:

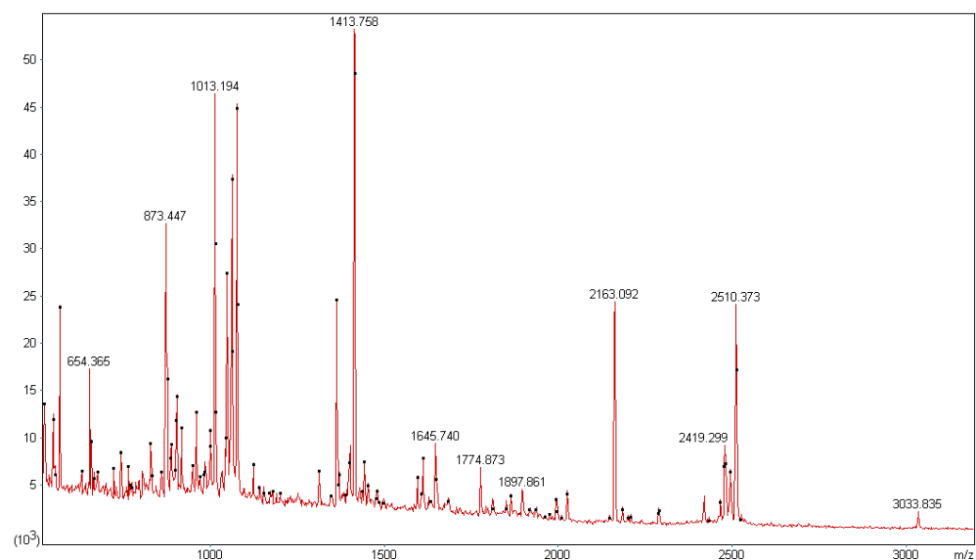

### Probability Based Mowse Score:

Protein score is  $-10 \cdot \log(P)$ , where P is the probability that the observed match is a random event. Protein scores greater than 61 are significant ( $p < 0.05$ ).

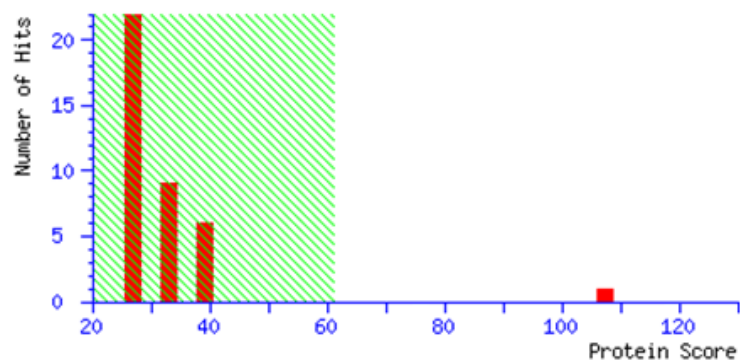

Spot No.: **80**

NCBI accession No.: *cassava4.1\_009410m*|PACid:17973470

Plant species: ***Manihot esculenta***

Protein name: **UDP-D-apiose/UDP-D-xylose synthase 1**

Mascot score: **163**

Sequence coverage %: **51**      p value: **3.7e-012**

Matched peptides No.: **24**      Total peptides No.: **73**

Calculated Mr: **43967**      Calculated pI: **6.03**

### Annotated PMF spectra:

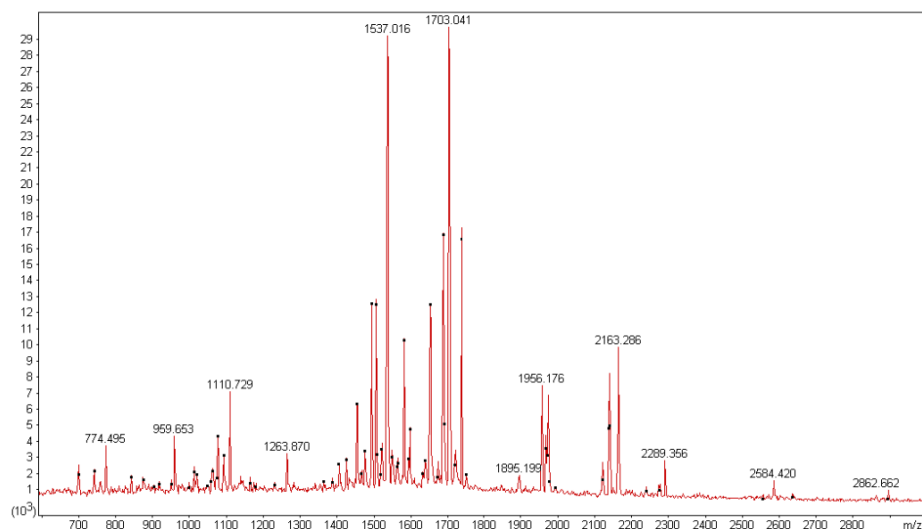

### Probability Based Mowse Score:

Protein score is  $-10 \cdot \log(P)$ , where P is the probability that the observed match is a random event. Protein scores greater than 61 are significant ( $p < 0.05$ ).

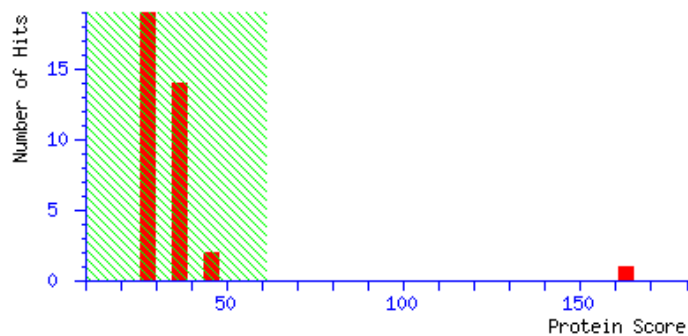

Spot No.: **81**

NCBI accession No.: **cassava4.1\_008604m|PACid:17979400**

Plant species: ***Manihot esculenta***

Protein name: **Cytosolic isocitrate dehydrogenase [NADP]**

Mascot score: **115**

Sequence coverage %: **45** p value: **2.3e-007**

Matched peptides No.: **17** Total peptides No.: **49**

Calculated Mr: **46844** Calculated pI: **6.07**

### Annotated PMF spectra:

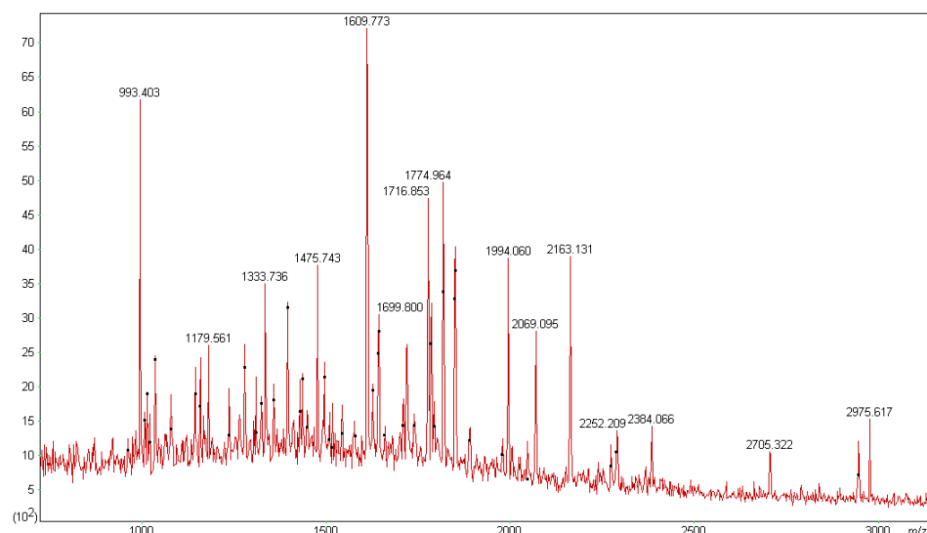

### Probability Based Mowse Score:

Protein score is  $-10 \cdot \log(P)$ , where P is the probability that the observed match is a random event. Protein scores greater than 61 are significant ( $p < 0.05$ ).

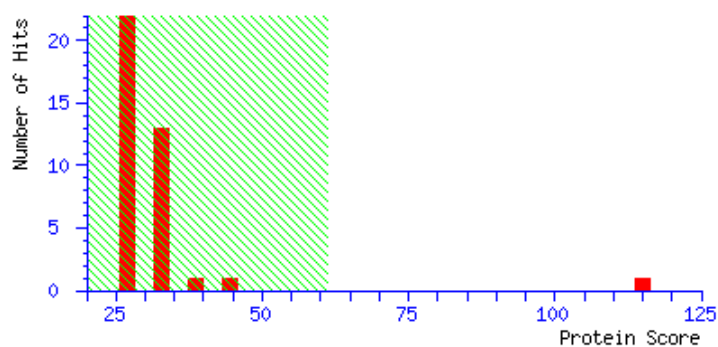



Spot No.: **82**

NCBI accession No.: **cassava4.1\_009808m|PACid:17965663**

Plant species: ***Manihot esculenta***

Protein name: **GDP-mannose 3,5-epimerase** Mascot score: **76**

Sequence coverage %: **41** p value: **0.002**

Matched peptides No.: **14** Total peptides No.: **58**

Calculated Mr: **42843** Calculated pI: **6.05**

### Annotated PMF spectra:

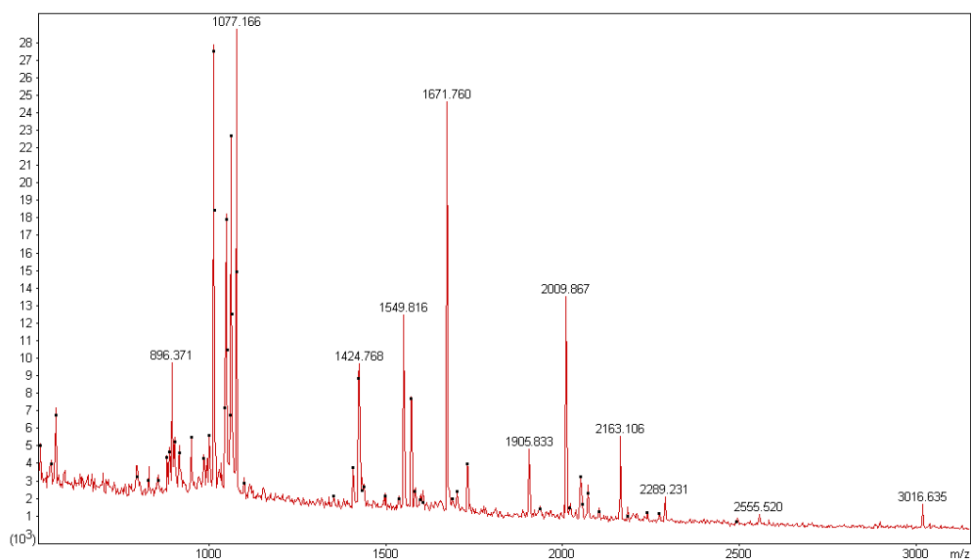

### Probability Based Mowse Score:

Protein score is  $-10 \cdot \log(P)$ , where P is the probability that the observed match is a random event. Protein scores greater than 61 are significant ( $p < 0.05$ ).

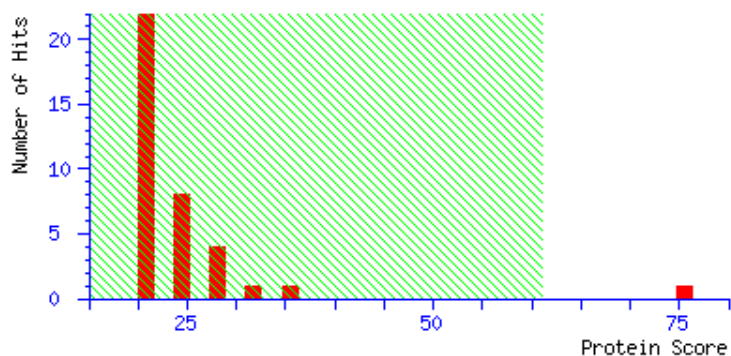

Spot No.: **83**

NCBI accession No.: *cassava4.1\_007673m*|PACid:17979089

Plant species: ***Manihot esculenta***

Protein name: **Bifunctional enolase 2/transcriptional activator**

Mascot score: **124**

Sequence coverage %: **42**      p value:  $2.9e-008$

Matched peptides No.: **17**      Total peptides No.: **57**

Calculated Mr: **48058**      Calculated pI: **5.86**

### Annotated PMF spectra:

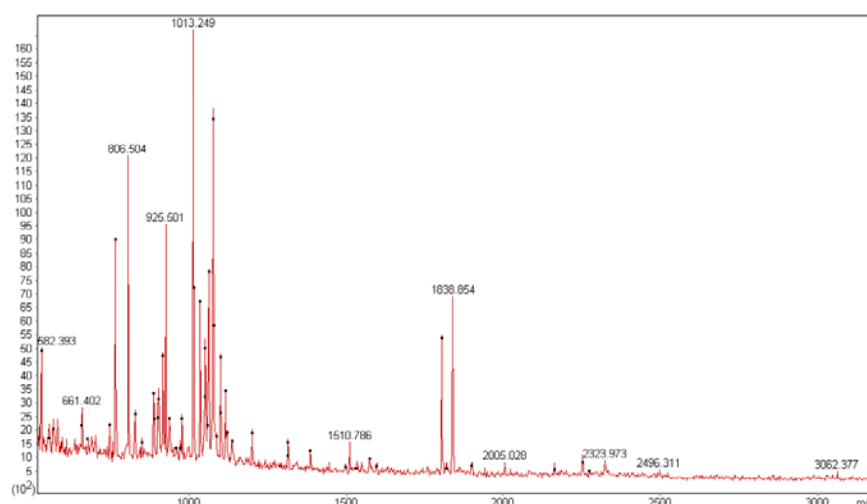

### Probability Based Mowse Score:

Protein score is  $-10 \cdot \log(P)$ , where P is the probability that the observed match is a random event. Protein scores greater than 61 are significant ( $p < 0.05$ ).

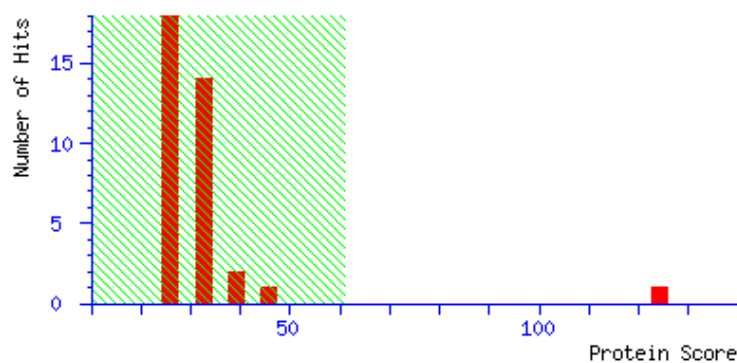

Spot No.: **84**

NCBI accession No.: **cassava4.1\_007678m|PACid:17961094**

Plant species: ***Manihot esculenta***

Protein name: **Bifunctional enolase 2/transcriptional activator**

Mascot score: **100**

Sequence coverage %: **46**

p value: **0.0000073**

Matched peptides No.: **14**

Total peptides No.: **45**

Calculated Mr: **47854**

Calculated pI: **5.86**

### Annotated PMF spectra:

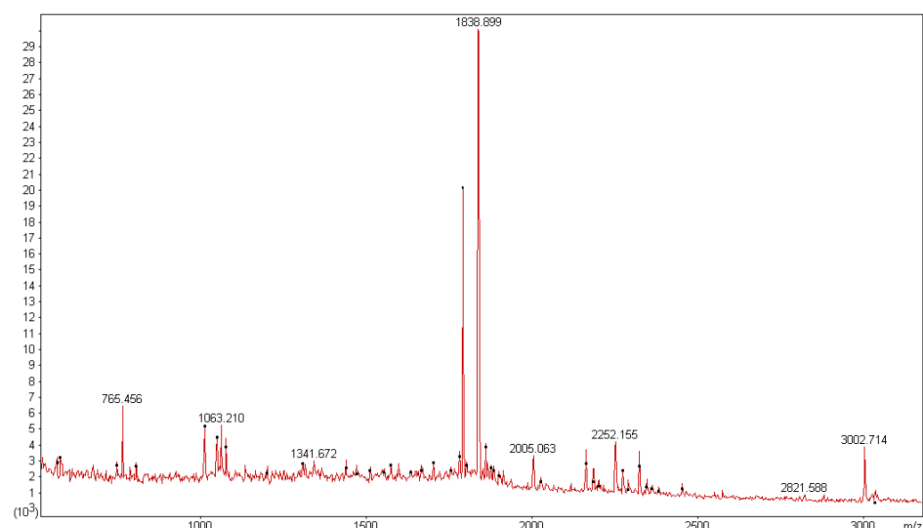

### Probability Based Mowse Score:

Protein score is  $-10 \cdot \log(P)$ , where P is the probability that the observed match is a random event. Protein scores greater than 61 are significant ( $p < 0.05$ ).

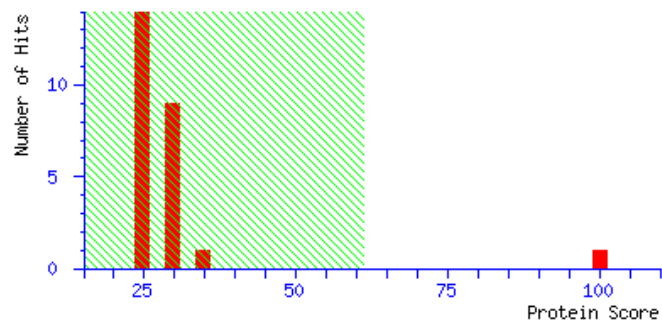

Spot No.: **85**

NCBI accession No.: **cassava4.1\_033530m|PACid:17973804**

Plant species: ***Manihot esculenta***

Protein name: **ATP synthase F1 subunit 1**

Mascot score: **151**                      p value: **1.3e-09**

Sequence coverage %: **42**

Matched peptides No.: **20**                      Total peptides No.: **56**

Calculated Mr: **55536**                      Calculated pI: **6.02**

### Annotated PMF spectra:

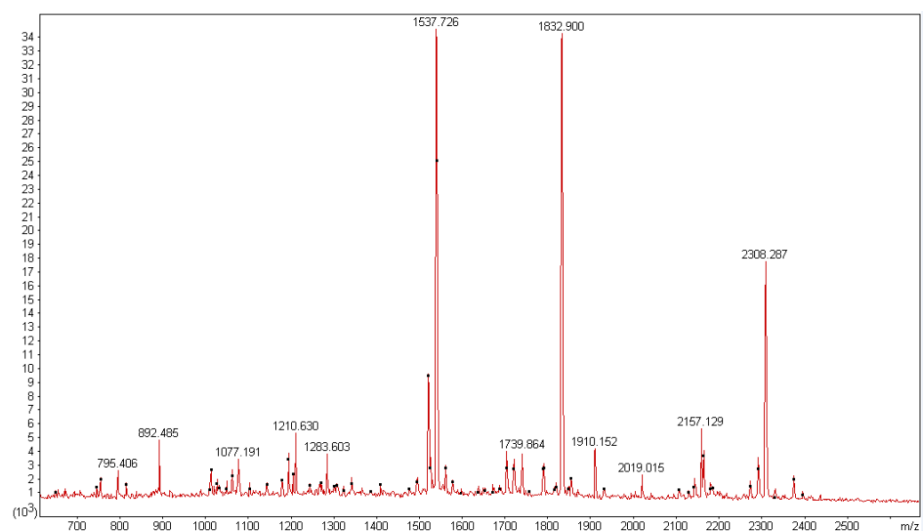

### Probability Based Mowse Score:

Protein score is  $-10 \cdot \log(P)$ , where P is the probability that the observed match is a random event. Protein scores greater than 75 are significant ( $p < 0.05$ ).

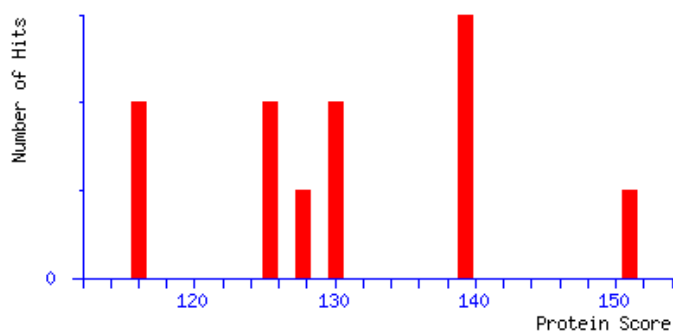

Spot No.: **86**

NCBI accession No.: **cassava4.1\_004164m|PACid:17985770**

Plant species: ***Manihot esculenta***

Protein name: **malic enzyme, putative**

Mascot score: **177**

Sequence coverage %: **47**      p value: **1.5e-013**

Matched peptides No.: **33**      Total peptides No.: **90**

Calculated Mr: **65246**      Calculated pI: **6.03**

### Annotated PMF spectra:

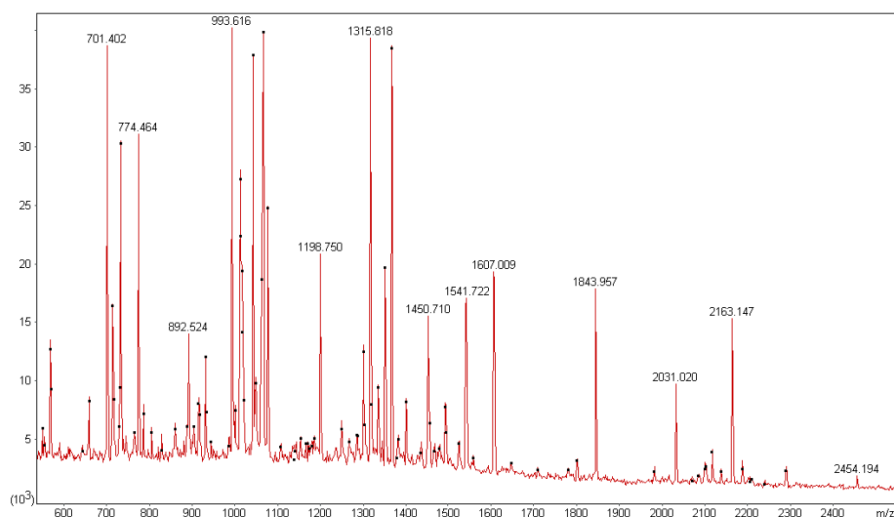

### Probability Based Mowse Score:

Protein score is  $-10 \cdot \log(P)$ , where P is the probability that the observed match is a random event. Protein scores greater than 61 are significant ( $p < 0.05$ ).

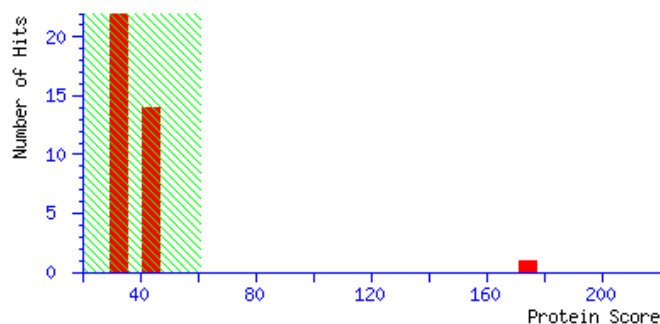

Spot No.: **87**

NCBI accession No.: *cassava4.1\_007673m*|PACid:17979089

Plant species: ***Manihot esculenta***

Protein name: **Bifunctional enolase 2/transcriptional activator**

PFF Mascot score: **[150]**

Sequence coverage %: **[7]**

Matched peptides No.: **[2]**

p value: **1e-013**

Calculated Mr: **48058**

Calculated pI: **5.86**

### Annotated PMF spectra:

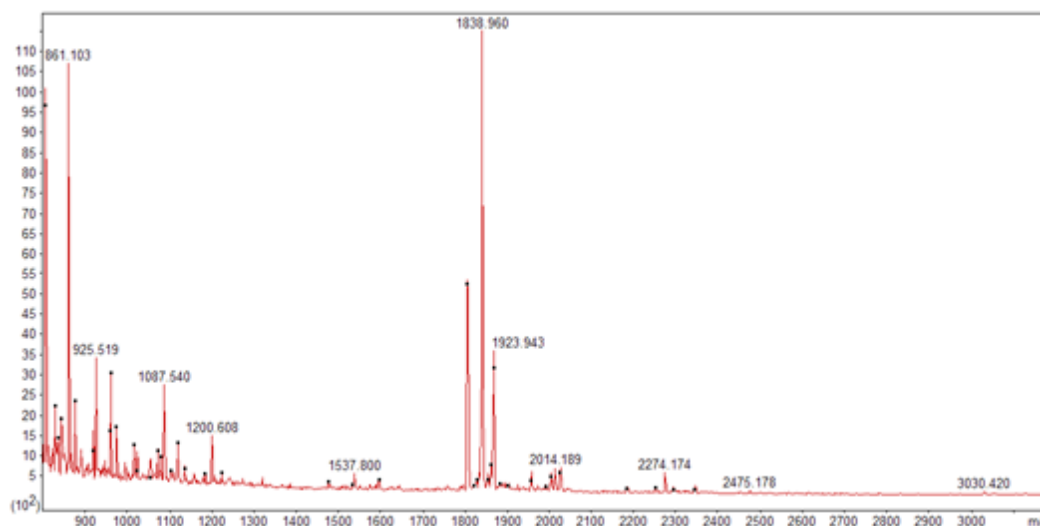

### PFF Searched Score:

Ions score is  $-10 \cdot \log(P)$ , where P is the probability that the observed match is a random event.

Individual ions scores  $> 33$  indicate identity or extensive homology ( $p < 0.05$ ).

Protein scores are derived from ions scores as a non-probabilistic basis for ranking protein hits.

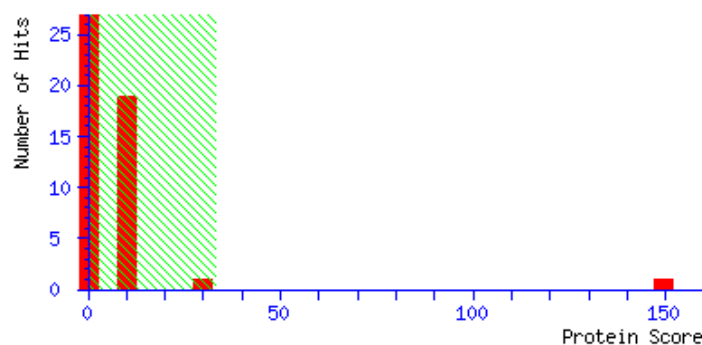

Spot No.: **88**

NCBI accession No.: *cassava4.1\_007678m*[PACid:17961094

Plant species: ***Manihot esculenta***

Protein name: **Bifunctional enolase 2/transcriptional activator**

Mascot score: **160**

Sequence coverage %: **62**      p value:  $7.3e-012$

Matched peptides No.: **25**      Total peptides No.: **78**

Calculated Mr: **47854**      Calculated pI: **5.86**

### Annotated PMF spectra:

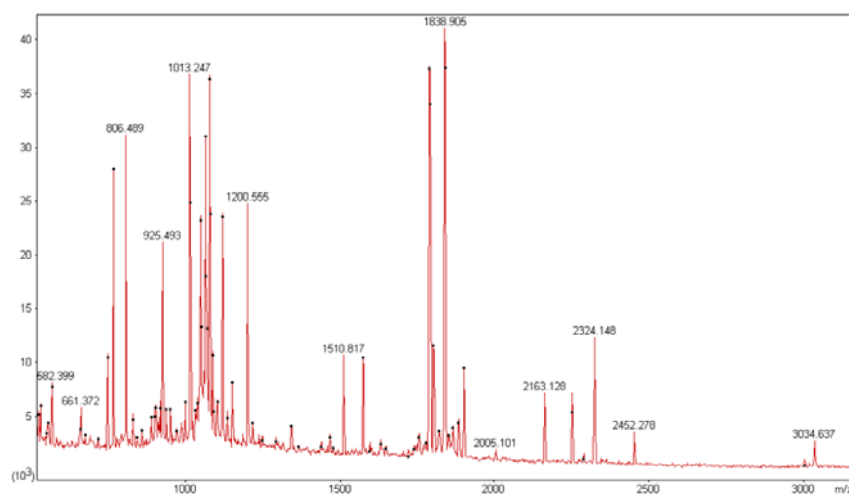

### Probability Based Mowse Score:

Protein score is  $-10 \cdot \log(P)$ , where P is the probability that the observed match is a random event. Protein scores greater than 61 are significant ( $p < 0.05$ ).

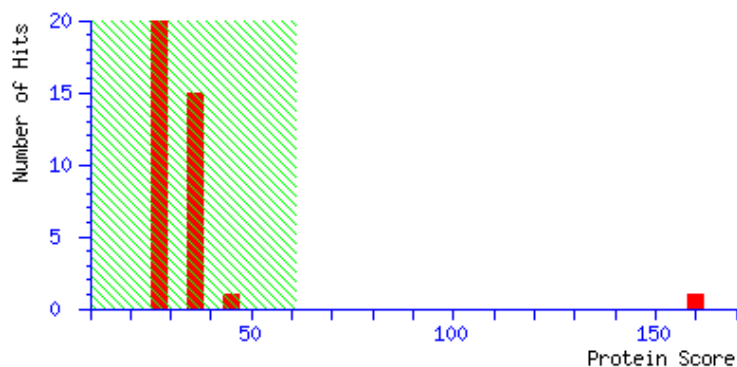

Spot No.: **89**

NCBI accession No.: *cassava4.1\_003677m*|PACid:17968299

Plant species: ***Manihot esculenta***

Protein name: **V-type proton ATPase catalytic subunit A**

Mascot score: **234**

Sequence coverage %: **61** p value:  $2.9e-019$

Matched peptides No.: **41**

Total peptides No.: **95**

Calculated Mr: **68989**

Calculated pI: **5.29**

### Annotated PMF spectra:

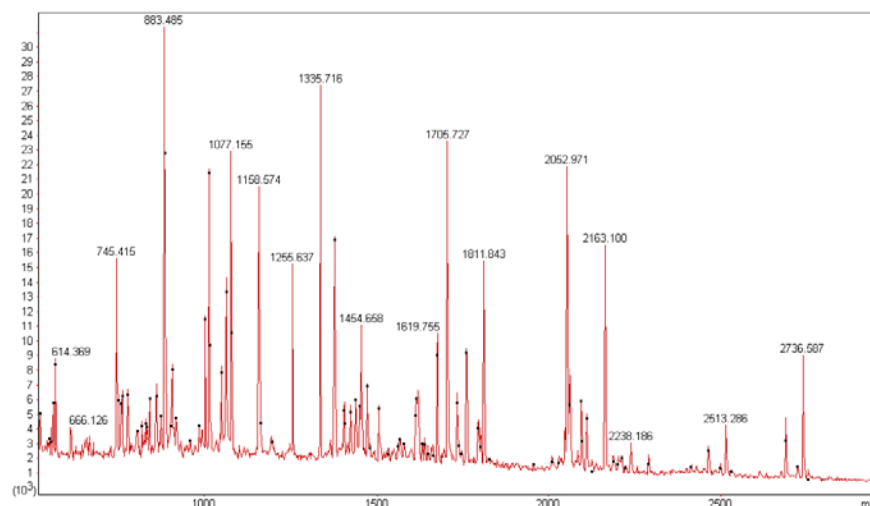

### Probability Based Mowse Score:

Protein score is  $-10 \cdot \log(P)$ , where P is the probability that the observed match is a random event. Protein scores greater than 61 are significant ( $p < 0.05$ ).

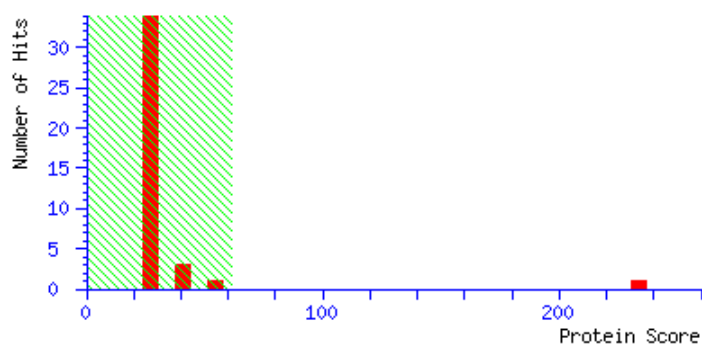



Spot No.: **90**

NCBI accession No.: *cassava4.1\_003676m*|PACid:17974360

Plant species: ***Manihot esculenta***

Protein name: **V-type proton ATPase catalytic subunit A**

Mascot score: **194**

Sequence coverage %: **49** p value: **2.9e-015**

Matched peptides No.: **30** Total peptides No.: **68**

Calculated Mr: **68956** Calculated pI: **5.34**

### Annotated PMF spectra:

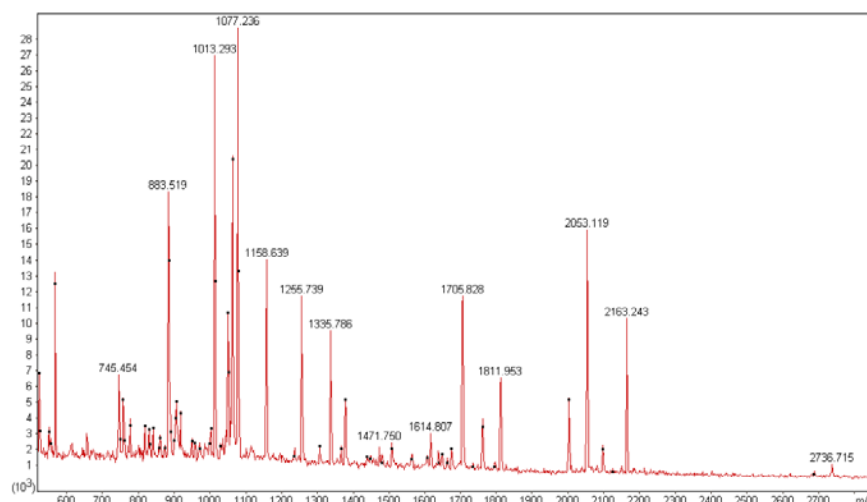

### Probability Based Mowse Score:

Protein score is  $-10 \cdot \log(P)$ , where P is the probability that the observed match is a random event. Protein scores greater than 61 are significant ( $p < 0.05$ ).

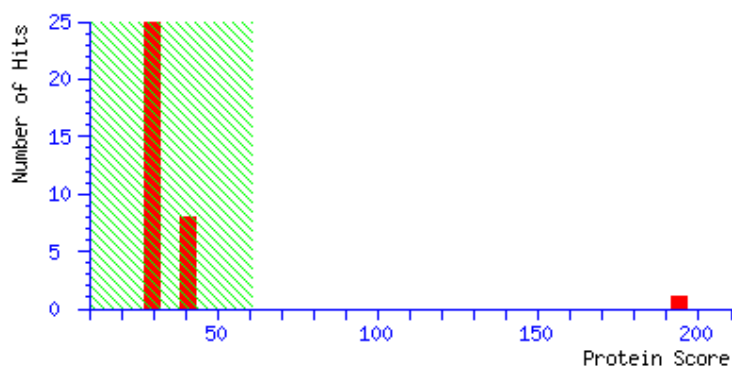

Spot No.: **91**

NCBI accession No.: **cassava4.1\_005518m|PACid:17993865**

Plant species: ***Manihot esculenta***

Protein name: **Glucose-1-phosphate adenylyltransferase small subunit, chloroplastic** Mascot score: **81**

Sequence coverage %: **34** p value: **0.00053**

Matched peptides No.: **16** Total peptides No.: **63**

Calculated Mr: **57581** Calculated pI: **6.69**

### Annotated PMF spectra:

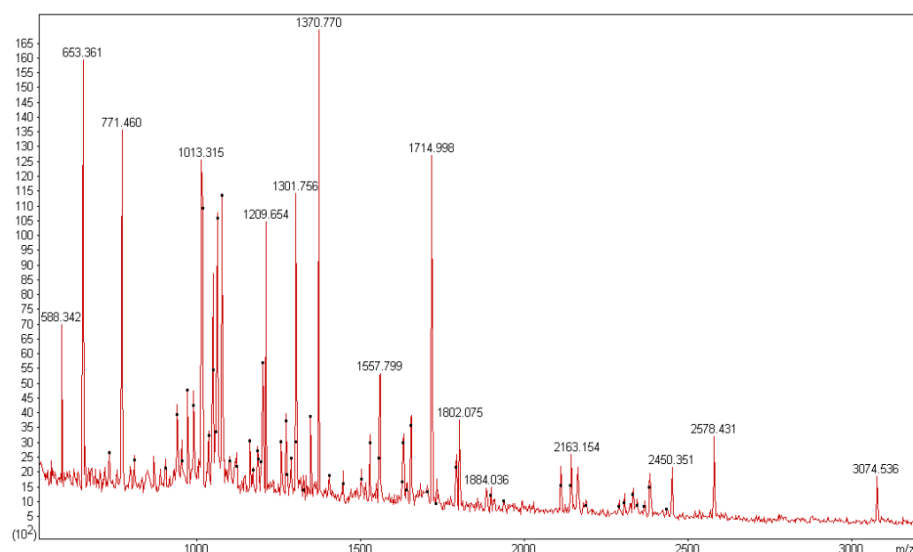

### Probability Based Mowse Score:

Protein score is  $-10 \cdot \log(P)$ , where P is the probability that the observed match is a random event. Protein scores greater than 61 are significant ( $p < 0.05$ ).

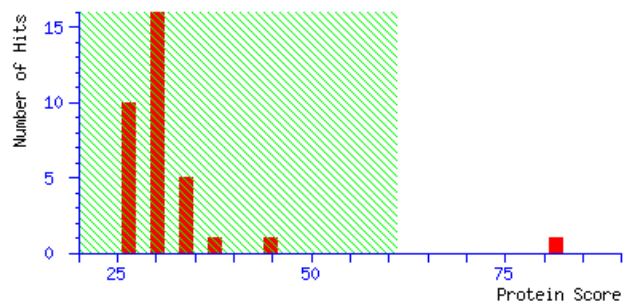

Spot No.: **92**

NCBI accession No.: **cassava4.1\_004164m|PACid:17985770**

Plant species: ***Manihot esculenta***

Protein name: **malic enzyme, putative**

Mascot score: **154**

Sequence coverage %: **35**      p value: **2.9e-11**

Matched peptides No.: **26**      Total peptides No.: **66**

Calculated Mr: **65246**      Calculated pI: **6.03**

### Annotated PMF spectra:

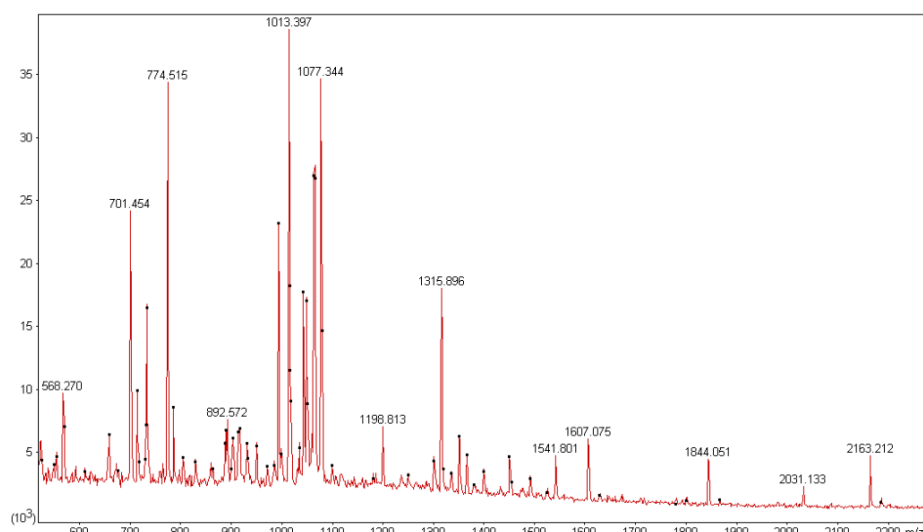

### Probability Based Mowse Score:

Protein score is  $-10 \cdot \log(P)$ , where P is the probability that the observed match is a random event. Protein scores greater than 61 are significant ( $p < 0.05$ ).

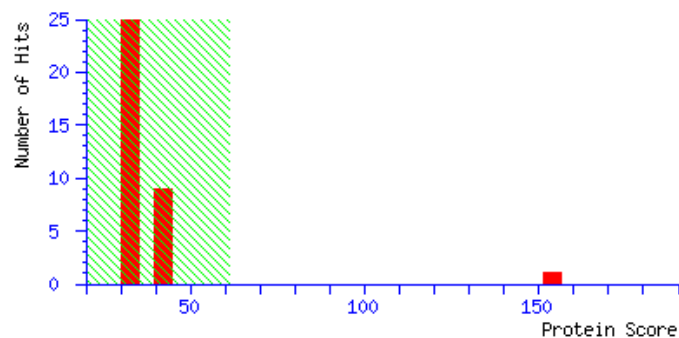

Spot No.: **93**

NCBI accession No.: *cassava4.1\_014432m*|PACid:17967798

Plant species: ***Manihot esculenta***

Protein name: **Triosephosphate isomerase, cytosolic**

PFF Mascot score: **[114]**      Sequence coverage %: **[23]**

Matched peptides No.: **[4]**      p value: **2e-005**

Calculated Mr: 27729      Calculated pI: **5.77**

### Annotated PMF spectra:

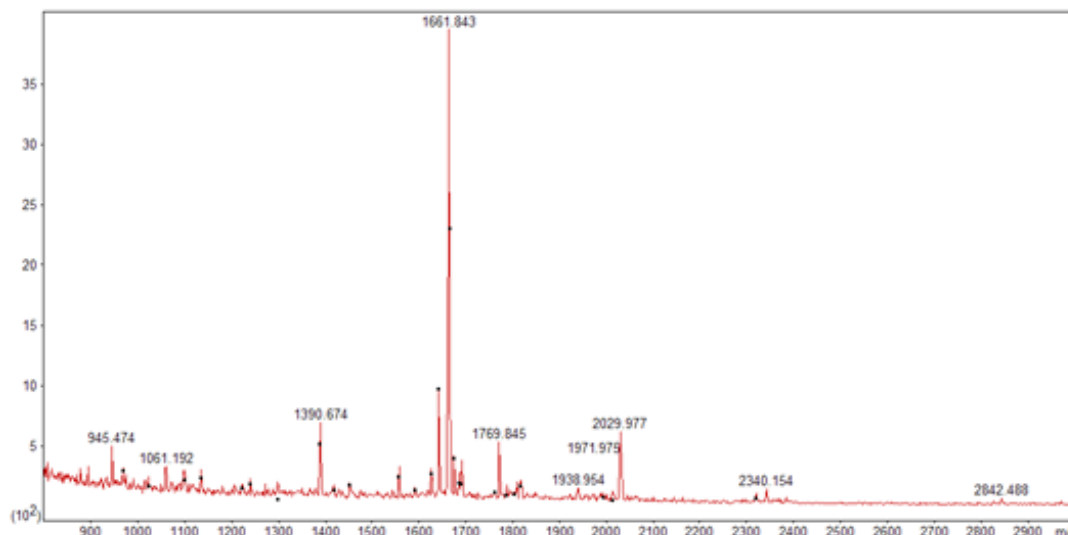

### PFF Searched Score:

Ions score is  $-10 \cdot \log(P)$ , where P is the probability that the observed match is a random event. Individual ions scores  $> 33$  indicate identity or extensive homology ( $p < 0.05$ ). Protein scores are derived from ions scores as a non-probabilistic basis for ranking protein hits.

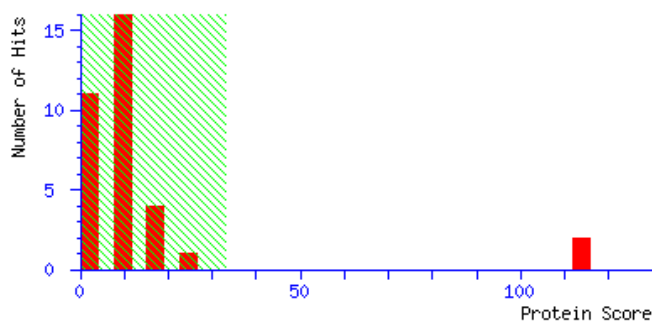

Spot No.: **94**

NCBI accession No.: *cassava4.1\_002466m*|PACid:17978799

Plant species: ***Manihot esculenta***

Protein name: **Alpha-glucan phosphorylase 1**

PFF Mascot score: **[278]**      Sequence coverage %: **[12]**

Matched peptides No.: **[7]**      p value: **1.1e-007**

Calculated Mr: 81918      Calculated pI: **8.50**

### Annotated PMF spectra:

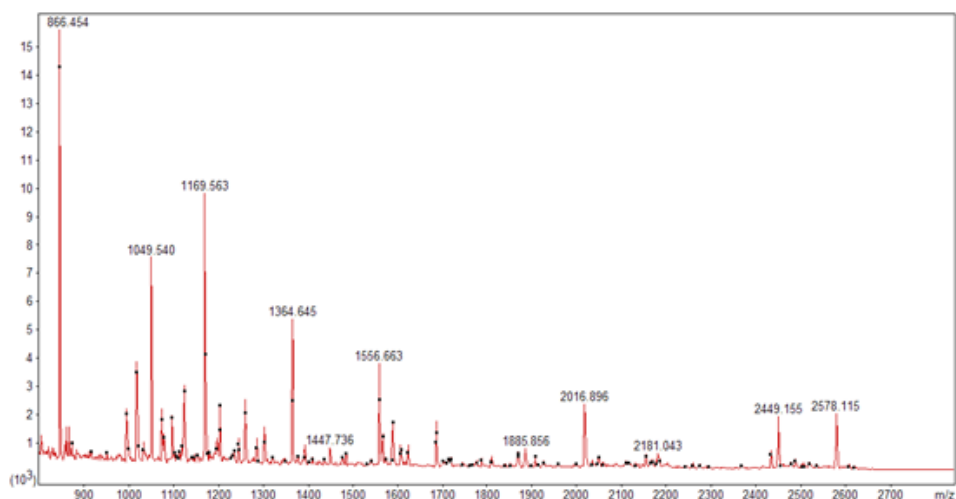

### PFF Searched Score:

Ions score is  $-10 \cdot \log(P)$ , where P is the probability that the observed match is a random event.

Individual ions scores  $> 34$  indicate identity or extensive homology ( $p < 0.05$ ).

Protein scores are derived from ions scores as a non-probabilistic basis for ranking protein hits.

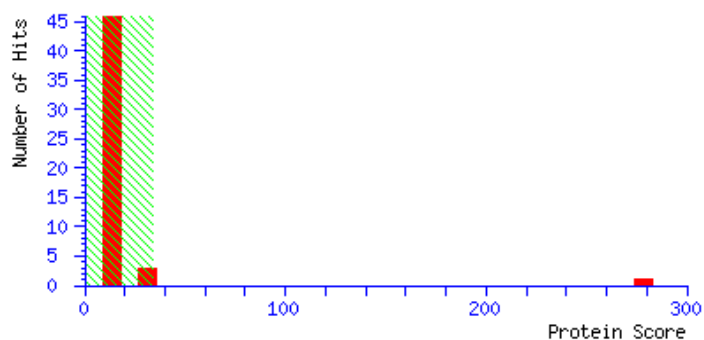

Spot No.: **95**

NCBI accession No.: *cassava4.1\_009779m*|PACid:17990964

Plant species: ***Manihot esculenta***

Protein name: **Actin-7**

PFF Mascot score: **[108]**      Sequence coverage %: **[9]**

Matched peptides No.: **[3]**      p value: **9.7e-0086**

Calculated Mr: 41897      Calculated pI: **5.31**

### Annotated PMF spectra:

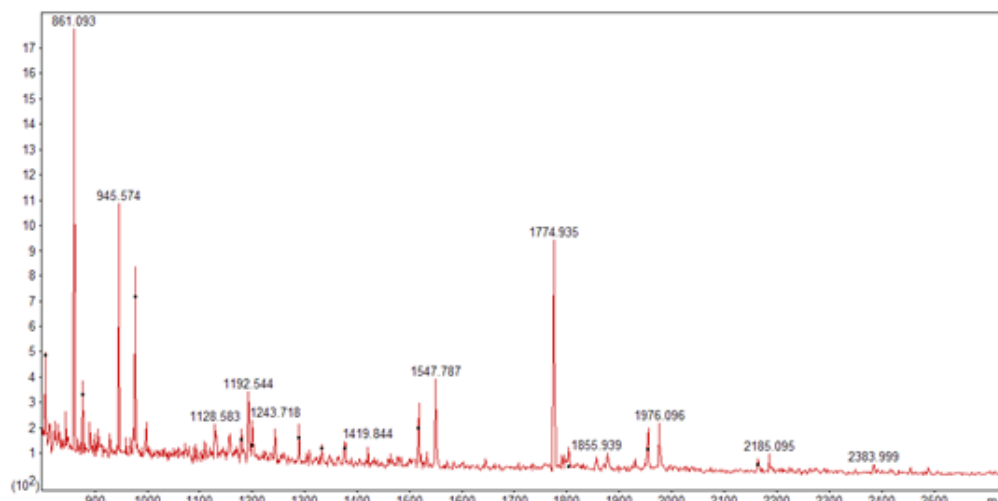

### PFF Searched Score:

Ions score is  $-10 \cdot \log(P)$ , where P is the probability that the observed match is a random event. Individual ions scores  $> 34$  indicate identity or extensive homology ( $p < 0.05$ ). Protein scores are derived from ions scores as a non-probabilistic basis for ranking protein hits.

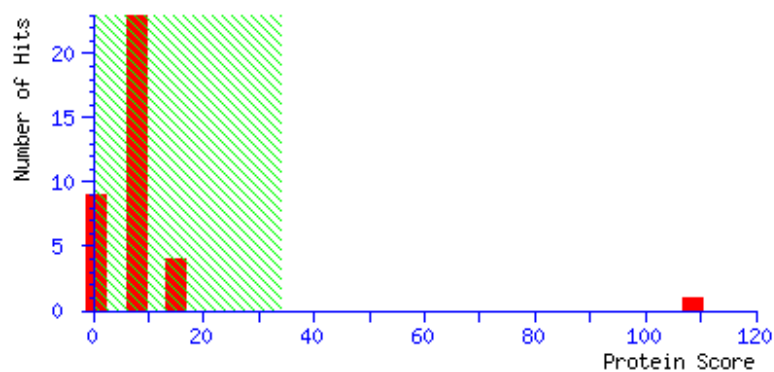

Spot No.: **96**

NCBI accession No.: *cassava4.1\_009779m*|PACid:17990964

Plant species: ***Manihot esculenta*** Protein name: **Actin-7**

PFF Mascot score: **[77]** Sequence coverage %: **[6]**

Matched peptides No.: **[2]** p value: **0.00032**

Calculated Mr: 41897 Calculated pI: **5.31**

### Annotated PMF spectra:

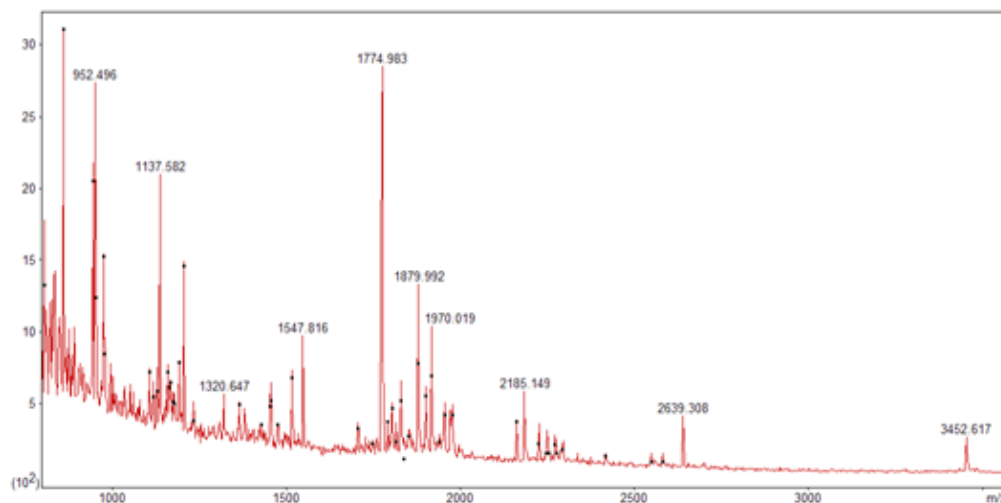

### PFF Searched Score:

Ions score is  $-10 \cdot \log(P)$ , where P is the probability that the observed match is a random event.

Individual ions scores  $> 34$  indicate identity or extensive homology ( $p < 0.05$ ).

Protein scores are derived from ions scores as a non-probabilistic basis for ranking protein hits.

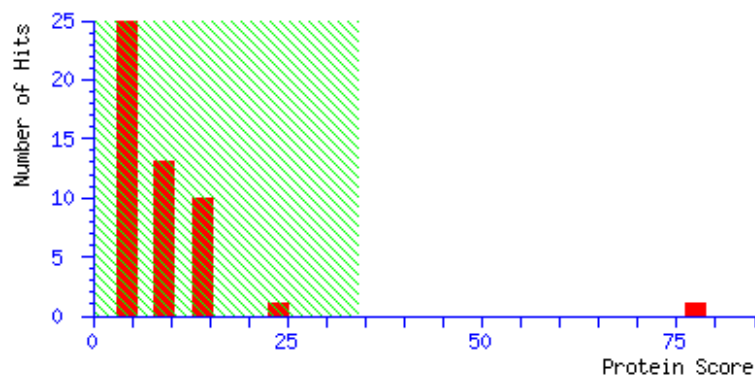

Spot No.: **97**

NCBI accession No.: *cassava4.1\_011729m*|PACid:17989246

Plant species: ***Manihot esculenta***

Protein name: **nitrile-specifier protein 5-like**

PFF Mascot score: **[165]**      Sequence coverage %: **[24]**

Matched peptides No.: **[7]**      p value: **0.00081**

Calculated Mr: 35840      Calculated pI: **5.49**

### Annotated PMF spectra:

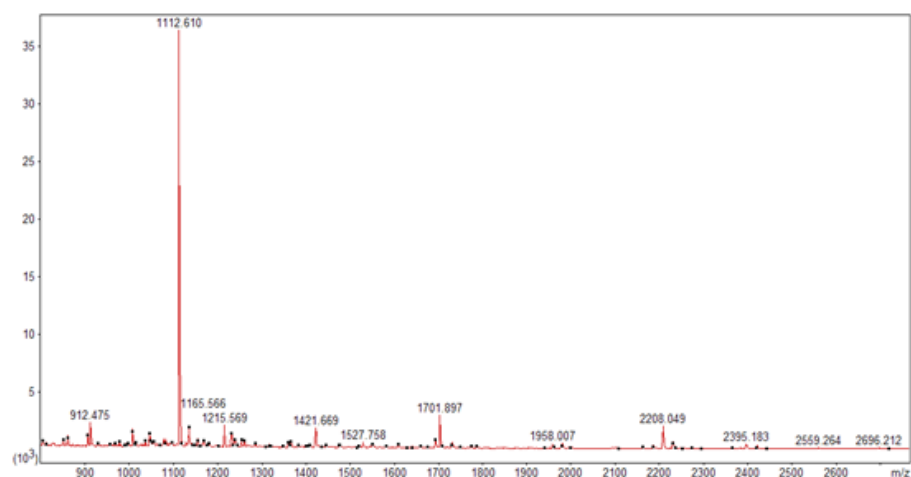

### PFF Searched Score:

Ions score is  $-10 \cdot \log(P)$ , where P is the probability that the observed match is a random event.

Individual ions scores  $> 33$  indicate identity or extensive homology ( $p < 0.05$ ).

Protein scores are derived from ions scores as a non-probabilistic basis for ranking protein hits.

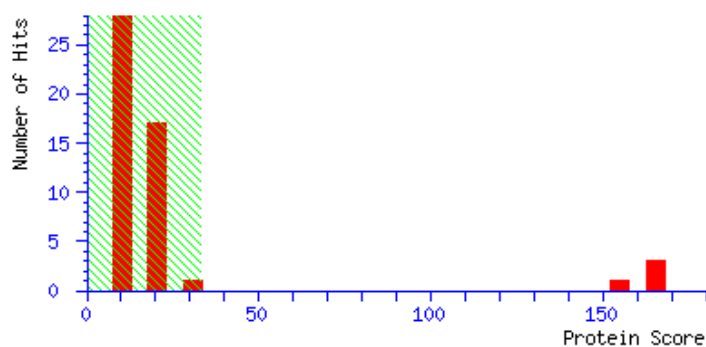



Spot No.: **98**

NCBI accession No.: **cassava4.1\_016053m|PACid:17985673**

Plant species: ***Manihot esculenta***

Protein name: **Abscisic acid receptor PYR1**

PFF Mascot score: **[190]**

Sequence coverage %: **[28]**

Matched peptides No.: **[4]**

p value: **2.2e-006**

Calculated Mr: 23981

Calculated pI: **5.26**

### Annotated PMF spectra:

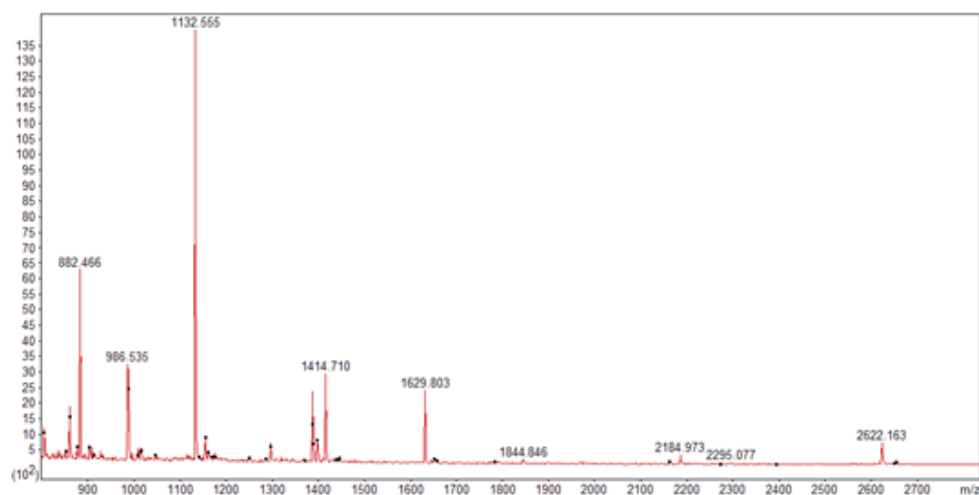

### PFF Searched Score:

Ions score is  $-10 \cdot \log(P)$ , where P is the probability that the observed match is a random event.

Individual ions scores  $> 34$  indicate identity or extensive homology ( $p < 0.05$ ).

Protein scores are derived from ions scores as a non-probabilistic basis for ranking protein hits.

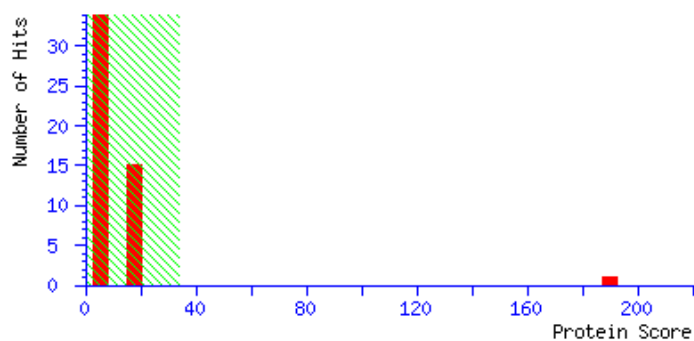

Spot No.: **99**

NCBI accession No.: *cassava4.1\_012016m*|PACid:17981009

Plant species: ***Manihot esculenta***

Protein name: **Triosephosphate isomerase, chloroplastic**

PFF Mascot score: **[210]**      Sequence coverage %: **[15]**

Matched peptides No.: **[4]**      p value: **1.5e-007**

Calculated Mr: 34643      Calculated pI: **6.96**

### Annotated PMF spectra:

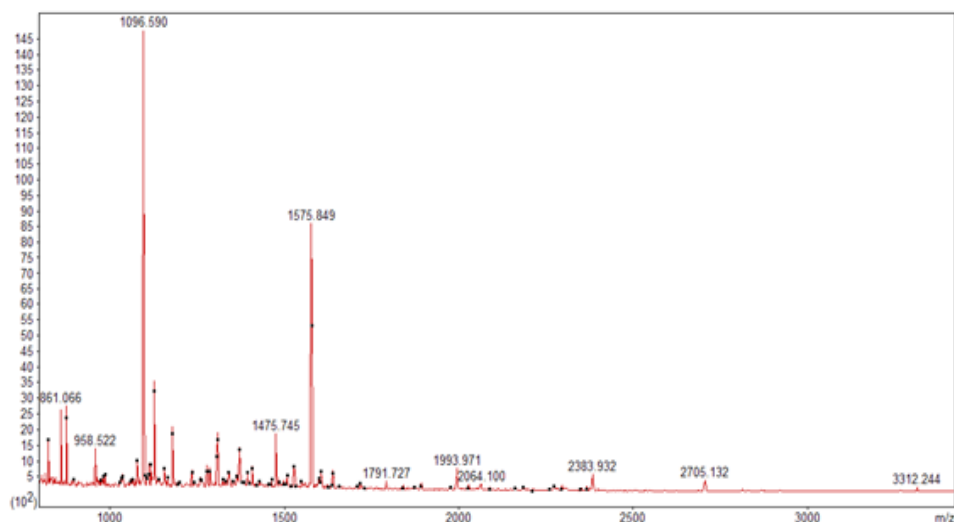

### PFF Searched Score:

Ions score is  $-10 \cdot \log(P)$ , where P is the probability that the observed match is a random event.

Individual ions scores  $> 33$  indicate identity or extensive homology ( $p < 0.05$ ).

Protein scores are derived from ions scores as a non-probabilistic basis for ranking protein hits.

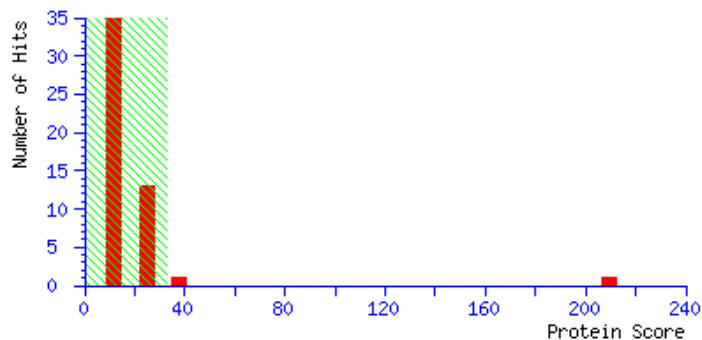

Spot No.: **100**

NCBI accession No.: *cassava4.1\_013157m*|PACid:17980169

Plant species: ***Manihot esculenta***

Protein name: **Dienelactone hydrolase domain-containing protein**

PFF Mascot score: **[161]**      Sequence coverage %: **[17]**

Matched peptides No.: **[3]**      p value: **1.6e-009**

Calculated Mr: 31535      Calculated pI: **6.54**

### Annotated PMF spectra:

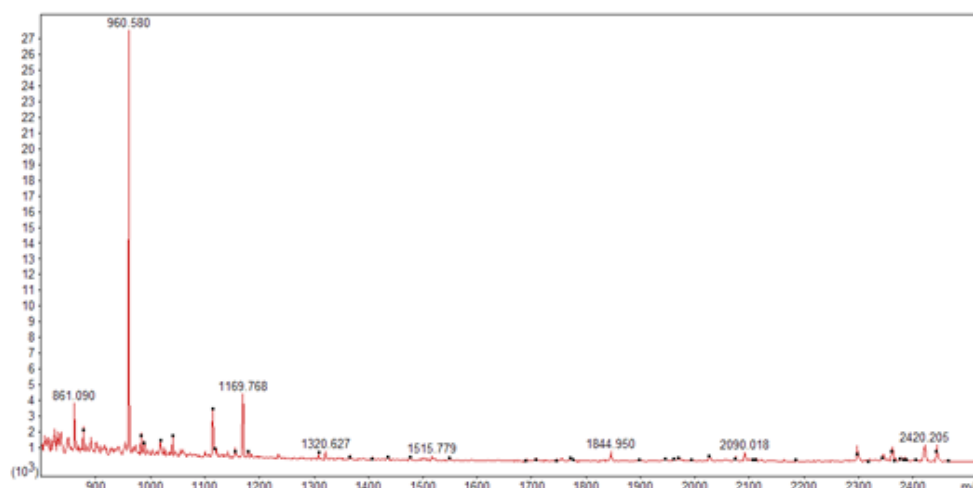

### PFF Searched Score:

Ions score is  $-10 \cdot \log(P)$ , where P is the probability that the observed match is a random event.

Individual ions scores  $> 33$  indicate identity or extensive homology ( $p < 0.05$ ).

Protein scores are derived from ions scores as a non-probabilistic basis for ranking protein hits.

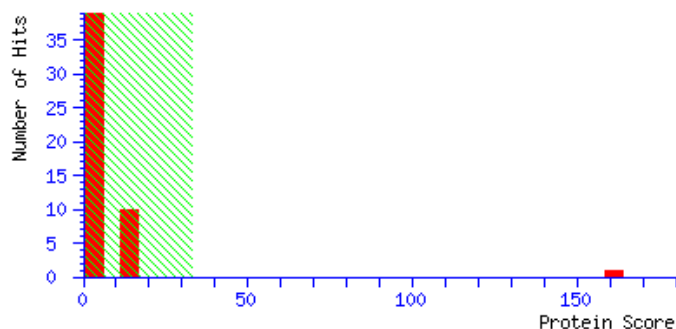

Spot No.: **101**

NCBI accession No.: *cassava4.1\_016210m*|PACid:17989119

Plant species: ***Manihot esculenta***

Protein name: **UMP-CMP kinase 3**

PFF Mascot score: **[67]**      Sequence coverage %: **[8]**

Matched peptides No.: **[2]**      p value: **0.0035**

Calculated Mr: 23568      Calculated pI: **5.34**

### Annotated PMF spectra:

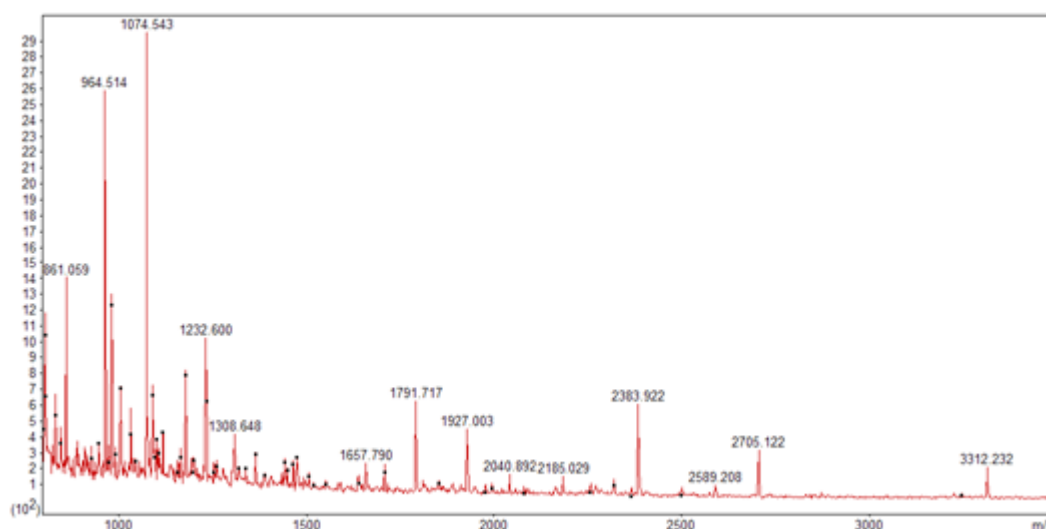

### PFF Searched Score:

Ions score is  $-10 \cdot \log(P)$ , where P is the probability that the observed match is a random event.

Individual ions scores  $> 34$  indicate identity or extensive homology ( $p < 0.05$ ).

Protein scores are derived from ions scores as a non-probabilistic basis for ranking protein hits.

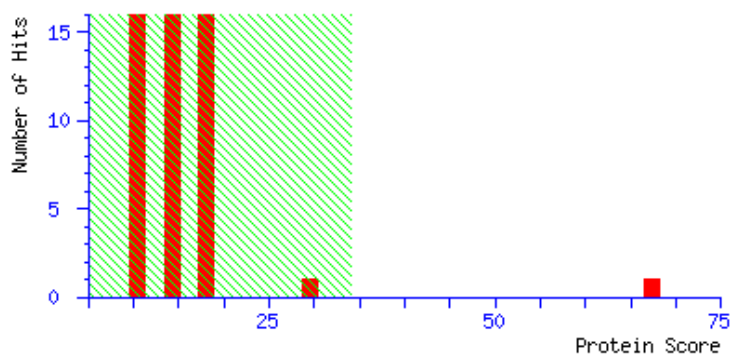

Spot No.: **102**

NCBI accession No.: *cassava4.1\_009779m*|PACid:17990964

Plant species: ***Manihot esculenta***

Protein name: **Actin-7**

PFF Mascot score: **[189]**

Sequence coverage %: **[24]**

Matched peptides No.: **[5]**

p value: **1.6e-007**

Calculated Mr: 41897

Calculated pI: **5.31**

### Annotated PMF spectra:

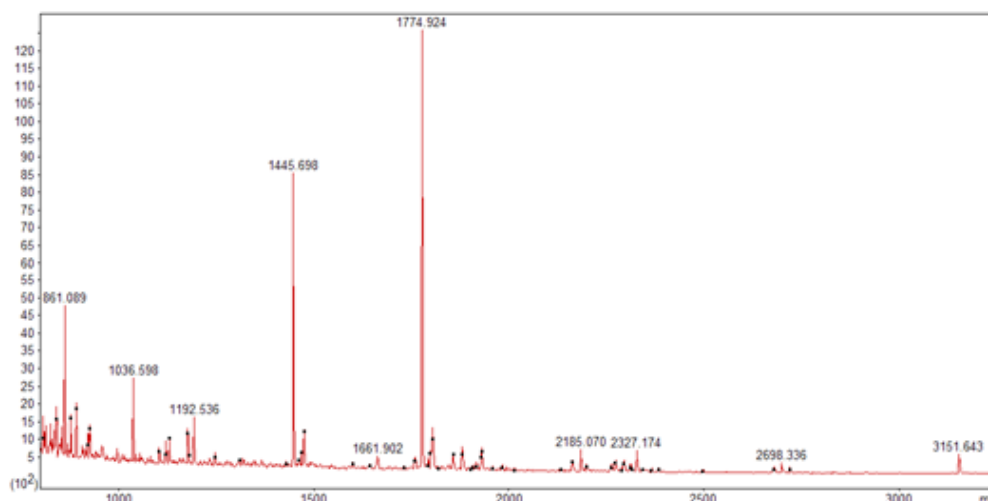

### PFF Searched Score:

Ions score is  $-10 \cdot \log(P)$ , where P is the probability that the observed match is a random event.

Individual ions scores  $> 33$  indicate identity or extensive homology ( $p < 0.05$ ).

Protein scores are derived from ions scores as a non-probabilistic basis for ranking protein hits.

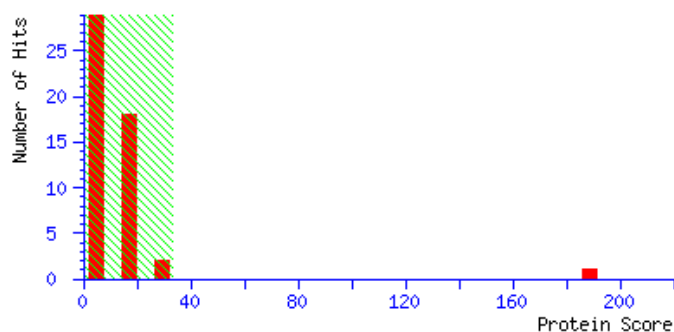

Spot No.: **103**

NCBI accession No.: *cassava4.1\_016465m*|PACid:17964780

Plant species: ***Manihot esculenta***

Protein name: **Proteasome subunit beta type-3-A**

PFF Mascot score: **[158]**      Sequence coverage %: **[11]**

Matched peptides No.: **[2]**      p value: **1.1e-008**

Calculated Mr: 23143      Calculated pI: **5.33**

### Annotated PMF spectra:

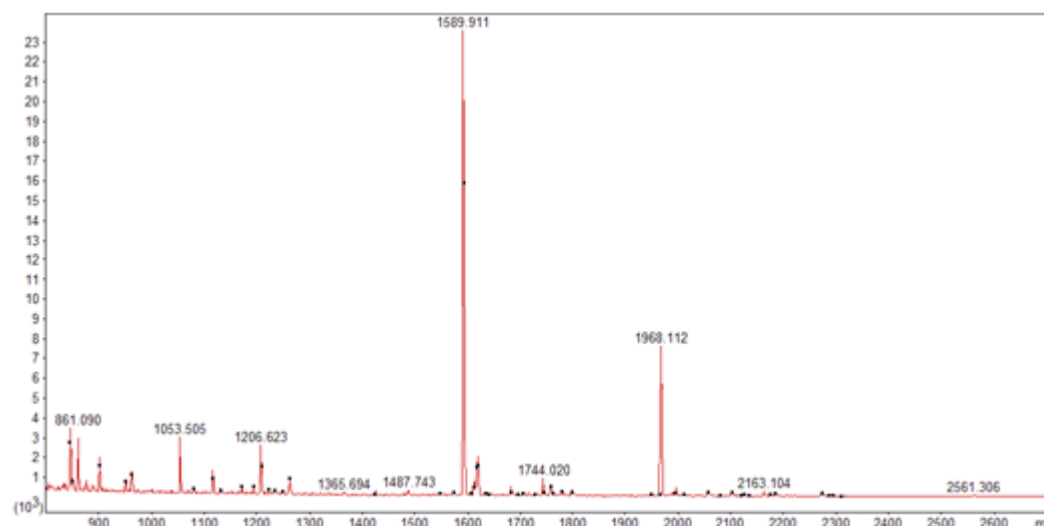

### PFF Searched Score:

Ions score is  $-10 \cdot \log(P)$ , where P is the probability that the observed match is a random event.

Individual ions scores  $> 34$  indicate identity or extensive homology ( $p < 0.05$ ).

Protein scores are derived from ions scores as a non-probabilistic basis for ranking protein hits.

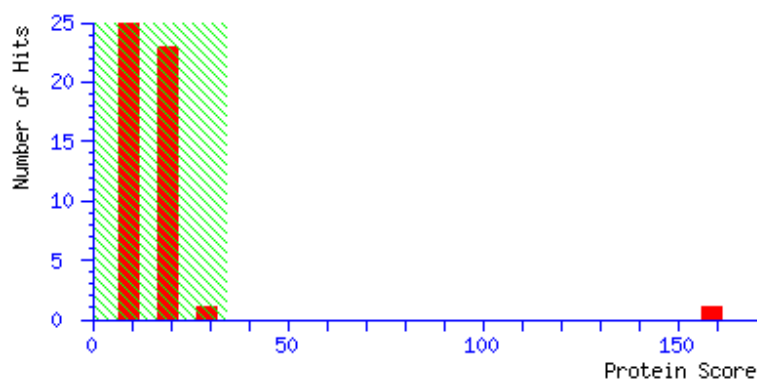

Spot No.: **104**

NCBI accession No.: *cassava4.1\_018289m*|PACid:17961715

Plant species: ***Manihot esculenta***

Protein name: **Superoxide dismutase [Cu-Zn] 1**

PFF Mascot score: **[61]**      Sequence coverage %: **[6]**

Matched peptides No.: **[2]**      p value: **0.00011**

Calculated Mr: 15219      Calculated pI: **5.42**

### Annotated PMF spectra:

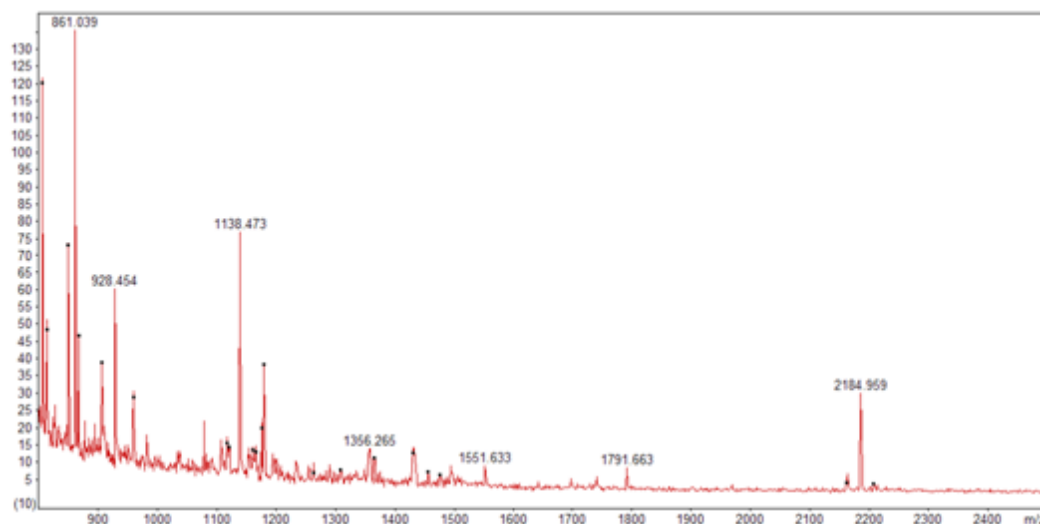

### PFF Searched Score:

Ions score is  $-10 \cdot \log(P)$ , where P is the probability that the observed match is a random event.

Individual ions scores  $> 34$  indicate identity or extensive homology ( $p < 0.05$ ).

Protein scores are derived from ions scores as a non-probabilistic basis for ranking protein hits.

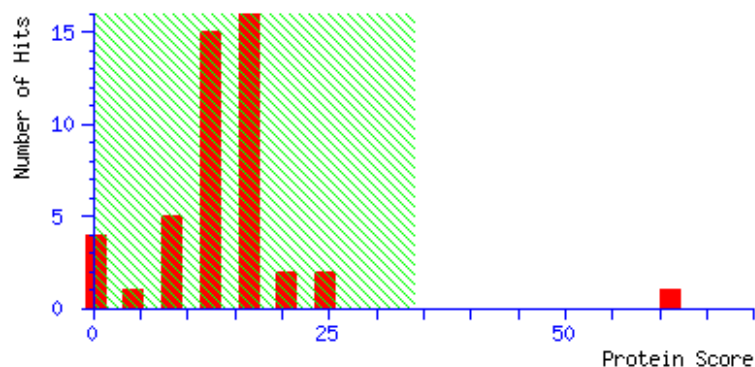

Spot No.: **105**

NCBI accession No.: *cassava4.1\_017871m*|PACid:17980723

Plant species: ***Manihot esculenta***

Protein name: **18.1 kDa class I heat shock protein**

PFF Mascot score: **[142]**      Sequence coverage %: **[23]**

Matched peptides No.: **[5]**      p value: **0.00014**

Calculated Mr: **18750**      Calculated pI: **7.93**

### Annotated PMF spectra:

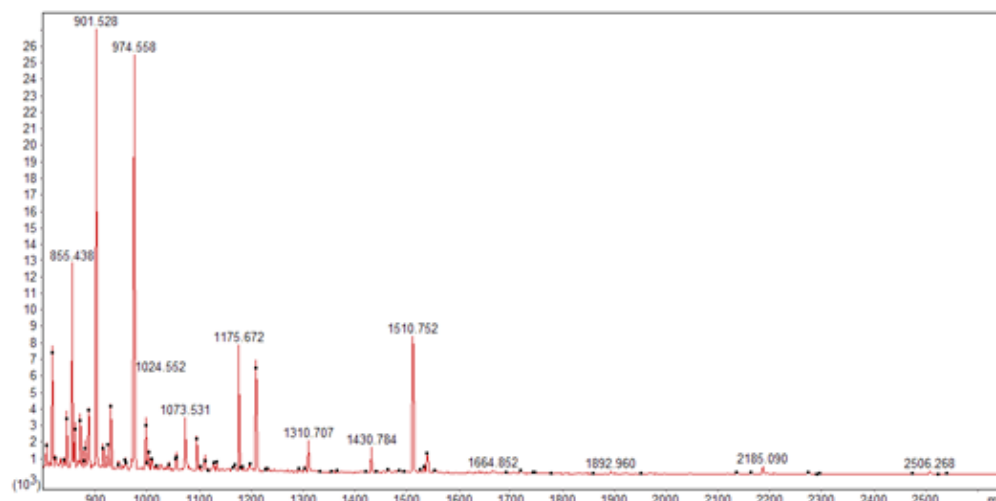

### PFF Searched Score:

Ions score is  $-10 \cdot \log(P)$ , where P is the probability that the observed match is a random event.

Individual ions scores  $> 34$  indicate identity or extensive homology ( $p < 0.05$ ).

Protein scores are derived from ions scores as a non-probabilistic basis for ranking protein hits.

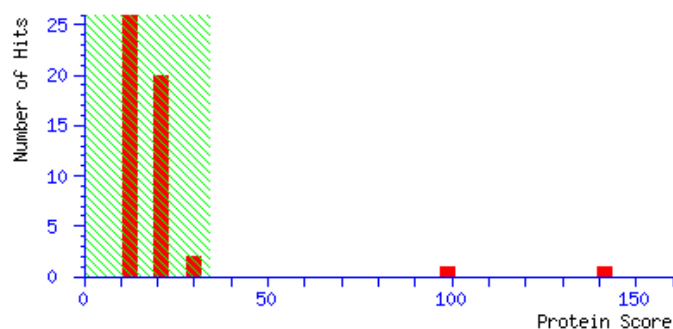



Spot No.: **106**

NCBI accession No.: *cassava4.1\_018294m*|PACid:17966054

Plant species: ***Manihot esculenta***

Protein name: **Superoxide dismutase [Cu-Zn] 1**

PFF Mascot score: **[130]**      Sequence coverage %: **[23]**

Matched peptides No.: **[3]**      p value: **0.00011**

Calculated Mr: 15416      Calculated pI: **5.85**

### Annotated PMF spectra:

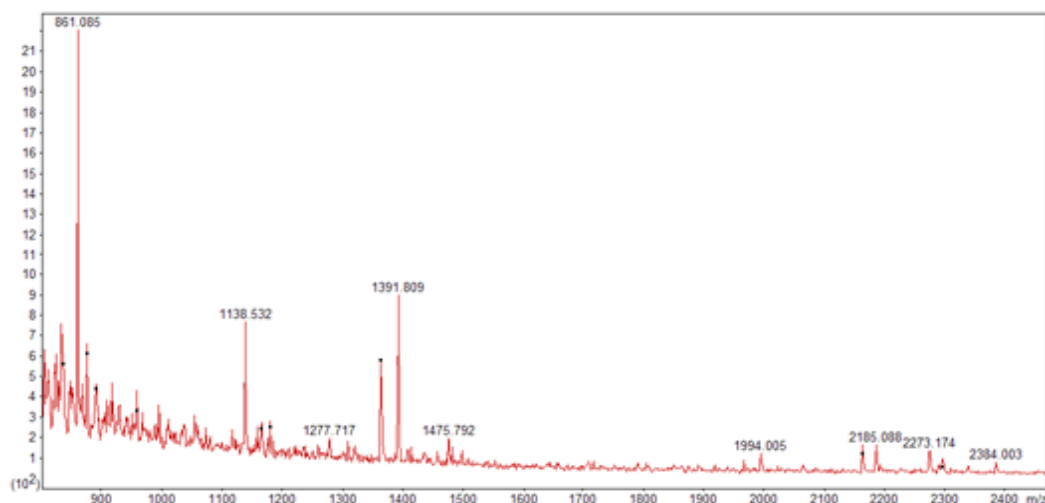

### PFF Searched Score:

Ions score is  $-10 \cdot \log(P)$ , where P is the probability that the observed match is a random event.

Individual ions scores  $> 34$  indicate identity or extensive homology ( $p < 0.05$ ).

Protein scores are derived from ions scores as a non-probabilistic basis for ranking protein hits.

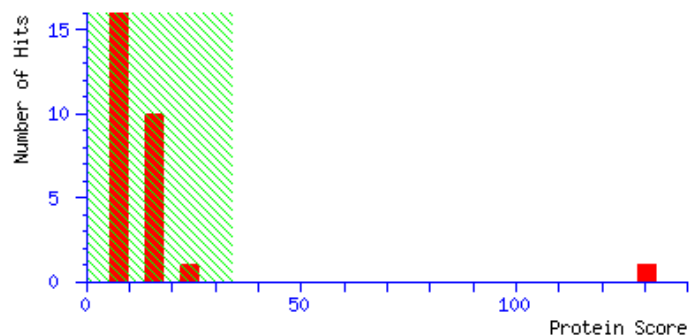

Spot No.: **107**

NCBI accession No.: *cassava4.1\_016175m*|PACid:17993085

Plant species: ***Manihot esculenta***

Protein name: **glutathione S-transferase GST, putative**

PFF Mascot score: **[257]**      Sequence coverage %: **[27]**

Matched peptides No.: **[5]**      p value: **1.9e-009**

Calculated Mr: 24372      Calculated pI: **6.25**

### Annotated PMF spectra:

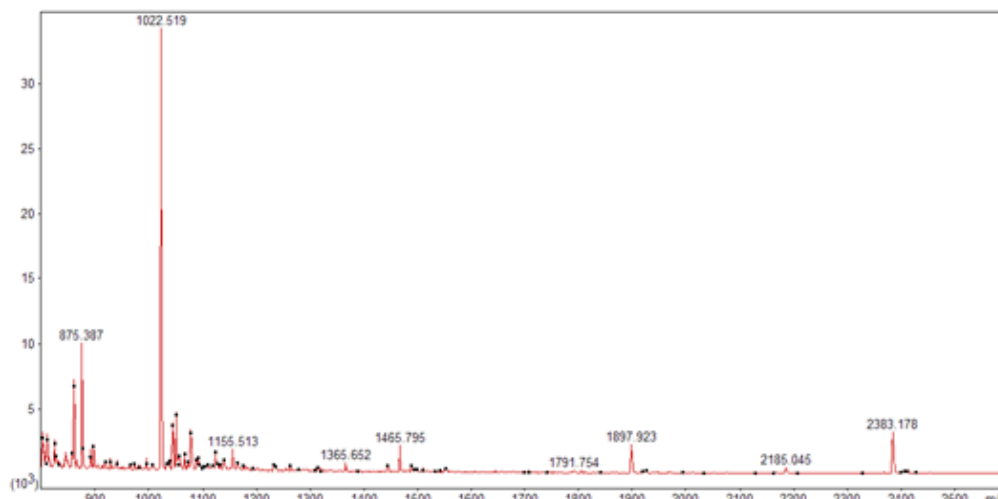

### PFF Searched Score:

Ions score is  $-10 \cdot \log(P)$ , where P is the probability that the observed match is a random event.

Individual ions scores  $> 34$  indicate identity or extensive homology ( $p < 0.05$ ).

Protein scores are derived from ions scores as a non-probabilistic basis for ranking protein hits.

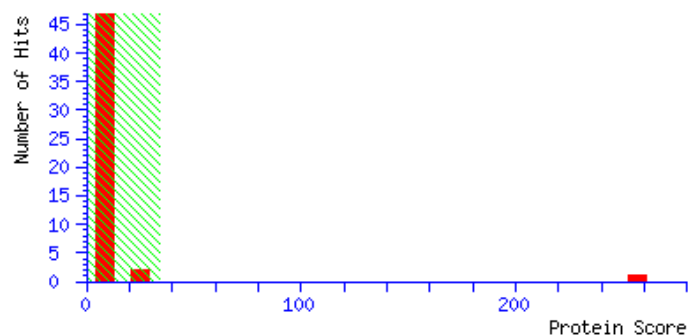

Spot No.: **108**

NCBI accession No.: *cassava4.1\_014432m*|PACid:17967798

Plant species: ***Manihot esculenta***

Protein name: **Triosephosphate isomerase, cytosolic**

PFF Mascot score: **[166]**      Sequence coverage %: **[16]**

Matched peptides No.: **[3]**      p value: **0.00021**

Calculated Mr: **27729**      Calculated pI: **5.77**

### Annotated PMF spectra:

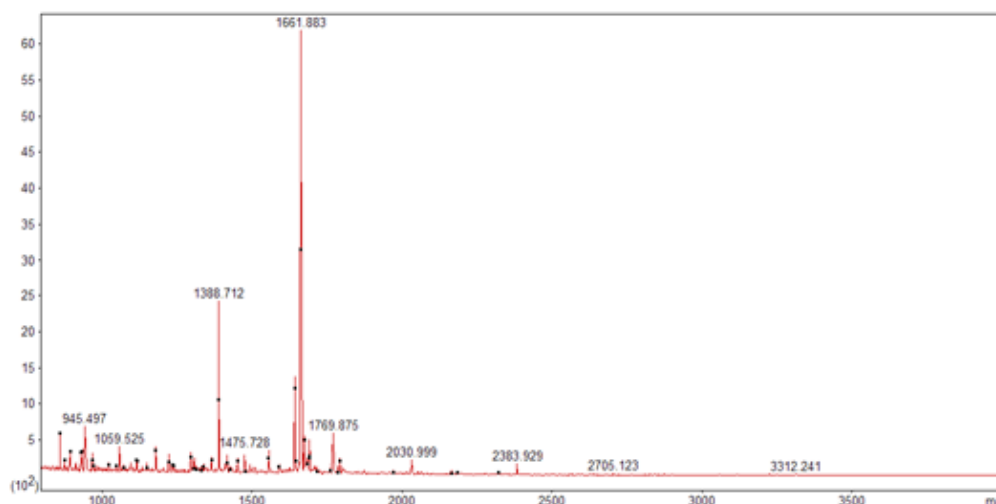

### PFF Searched Score:

Ions score is  $-10 \cdot \log(P)$ , where P is the probability that the observed match is a random event.

Individual ions scores  $> 34$  indicate identity or extensive homology ( $p < 0.05$ ).

Protein scores are derived from ions scores as a non-probabilistic basis for ranking protein hits.

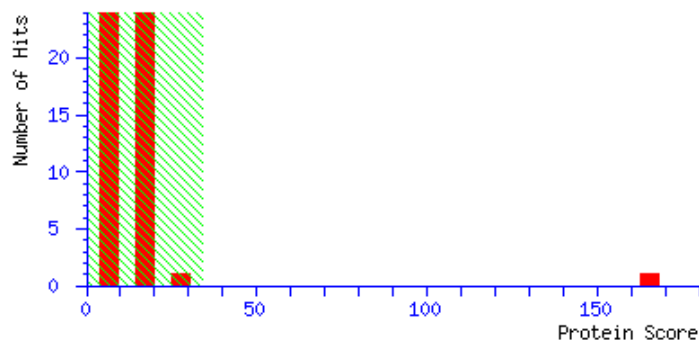

Spot No.: **109**

NCBI accession No.: *cassava4.1\_011868m*[PACid:17990035]

Plant species: ***Manihot esculenta***

Protein name: **6-phosphogluconolactonase**

PFF Mascot score: **[77]**      Sequence coverage %: **[5]**

Matched peptides No.: **[2]**      p value: **0.0018**

Calculated Mr: **35492**      Calculated pI: **8.07**

### Annotated PMF spectra:

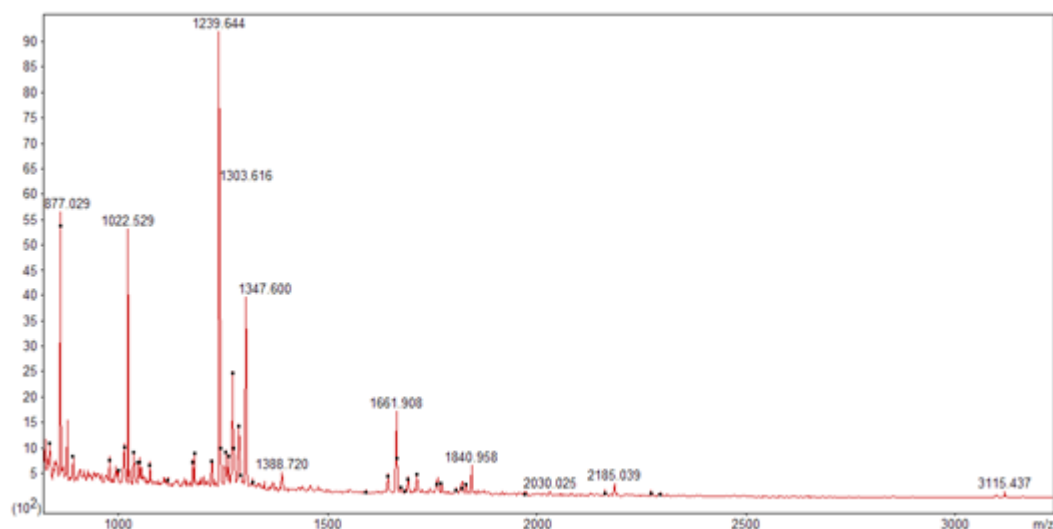

### PFF Searched Score:

Ions score is  $-10 \cdot \log(P)$ , where P is the probability that the observed match is a random event.

Individual ions scores  $> 33$  indicate identity or extensive homology ( $p < 0.05$ ).

Protein scores are derived from ions scores as a non-probabilistic basis for ranking protein hits.

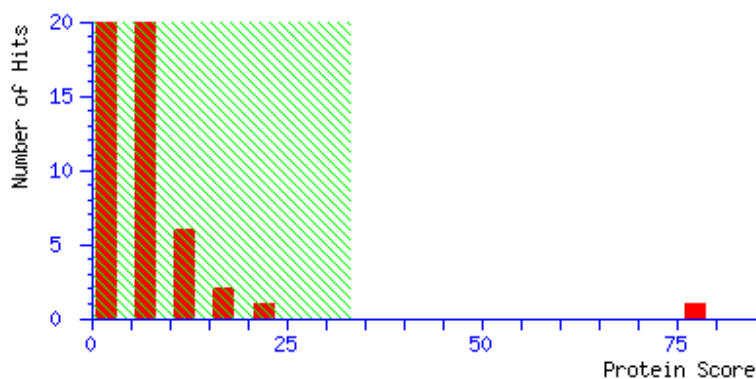

Spot No.: **110**

NCBI accession No.: *cassava4.1\_014432m*|PACid:17967798

Plant species: ***Manihot esculenta***

Protein name: **Triosephosphate isomerase, cytosolic**

PFF Mascot score: **[298]**      Sequence coverage %: **[31]**

Matched peptides No.: **[7]**      p value: **2.3e-006**

Calculated Mr: 27729      Calculated pI: **5.77**

### Annotated PMF spectra:

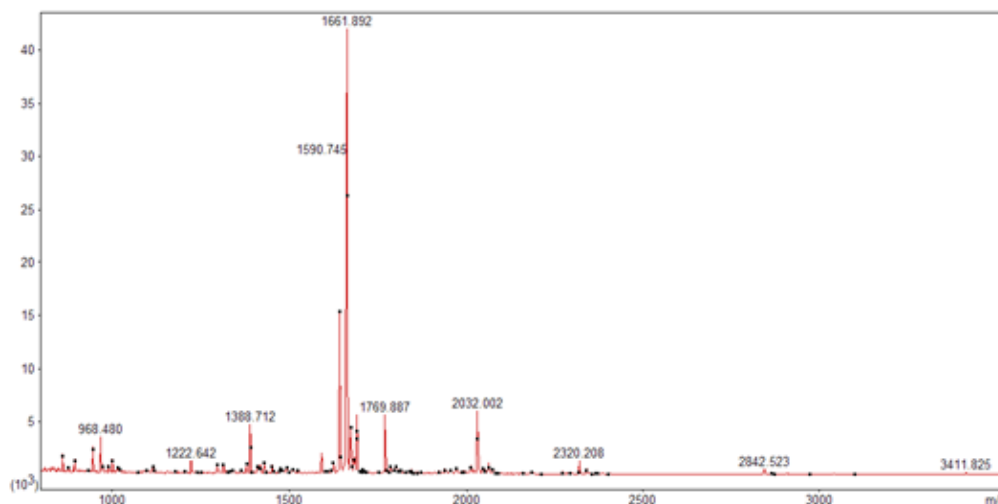

### PFF Searched Score:

Ions score is  $-10 \cdot \log(P)$ , where P is the probability that the observed match is a random event.

Individual ions scores  $> 33$  indicate identity or extensive homology ( $p < 0.05$ ).

Protein scores are derived from ions scores as a non-probabilistic basis for ranking protein hits.

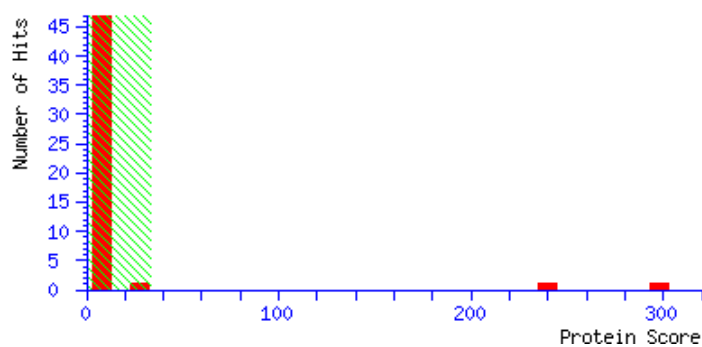

Spot No.: 111

NCBI accession No.: cassava4.1\_021183m|PACid:17971835

Plant species: *Ricinus communis*

Protein name: **annexin**

PFF Mascot score: **[298]**

Sequence coverage %: **[21]**

Matched peptides No.: **[6]**

p value: **0.000000042**

Calculated Mr: 33276

Calculated pI: **6.04**

### Annotated PMF spectra:

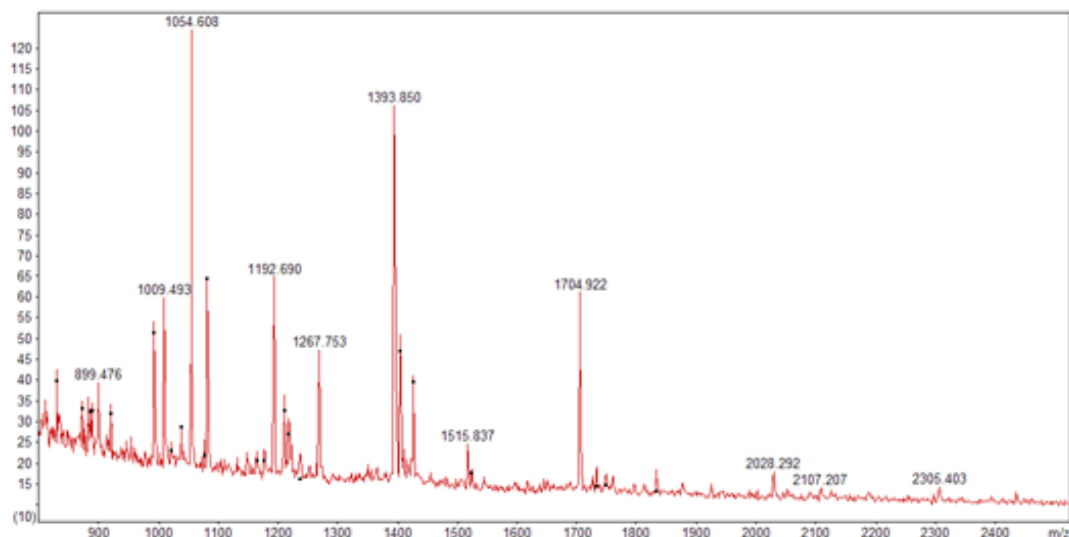

### PFF Searched Score:

Ions score is  $-10 \cdot \log(P)$ , where P is the probability that the observed match is a random event.

Individual ions scores  $> 34$  indicate identity or extensive homology ( $p < 0.05$ ).

Protein scores are derived from ions scores as a non-probabilistic basis for ranking protein hits.

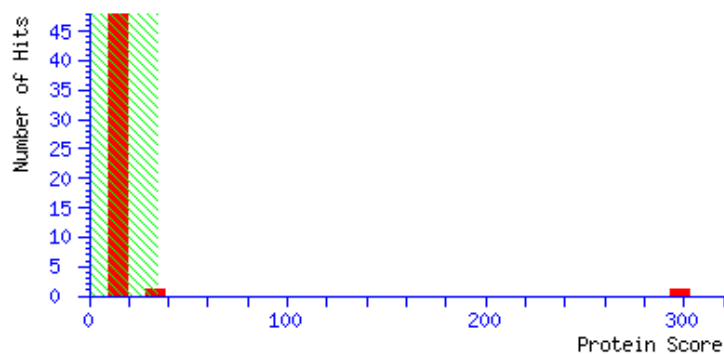

Spot No.: **112**

NCBI accession No.: **cassava4.1\_010344m|PACid:17990491**

Plant species: ***Manihot esculenta***

Protein name: **alcohol dehydrogenase, putative**

PFF Mascot score: **[343]**      Sequence coverage %: **[8]**

Matched peptides No.: **[2]**      p value: **3.9e-011**

Calculated Mr: 39515      Calculated pI: **6.15**

### Annotated PMF spectra:

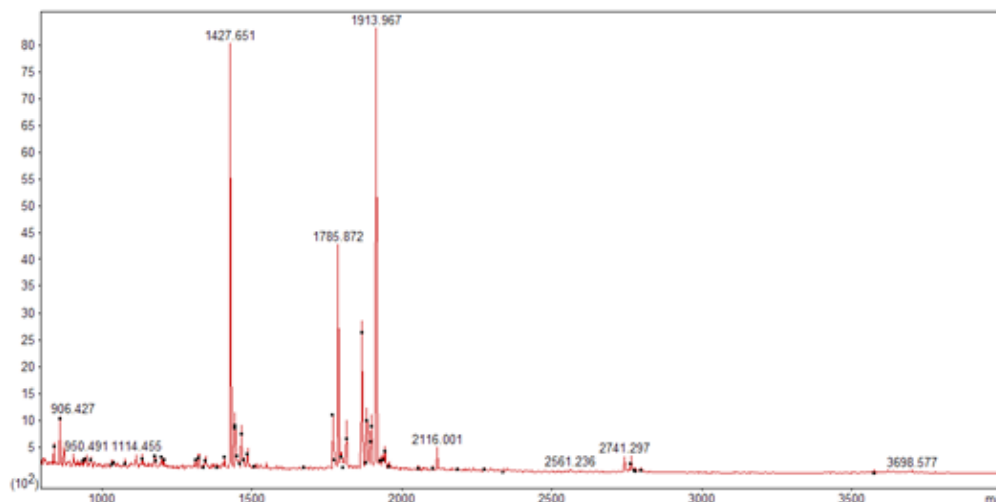

### PFF Searched Score:

Ions score is  $-10 \cdot \log(P)$ , where P is the probability that the observed match is a random event.

Individual ions scores  $> 32$  indicate identity or extensive homology ( $p < 0.05$ ).

Protein scores are derived from ions scores as a non-probabilistic basis for ranking protein hits.

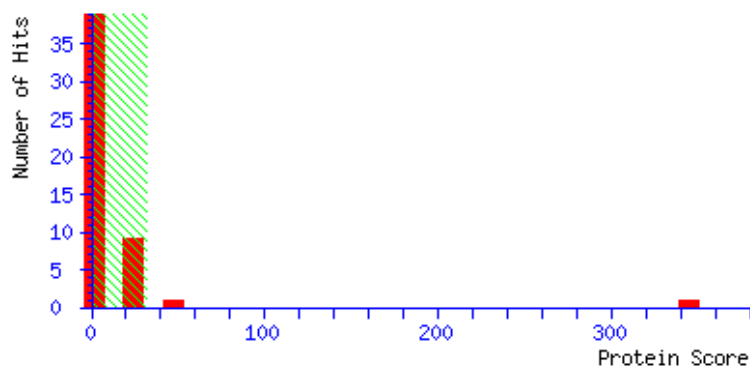

Spot No.: **113**

NCBI accession No.: **cassava4.1\_009779m|PACid:17990964**

Plant species: ***Manihot esculenta***

Protein name: **Actin-7**

PFF Mascot score: **[440]**

Sequence coverage %: **[36]**

Matched peptides No.: **[9]**

p value: **2.9e-012**

Calculated Mr: 41897

Calculated pI: **5.31**

### Annotated PMF spectra:

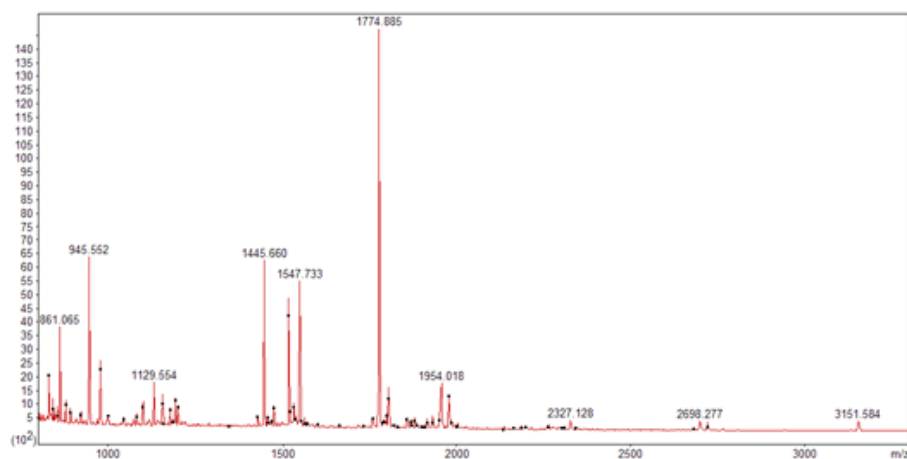

### PFF Searched Score:

Ions score is  $-10 \cdot \log(P)$ , where P is the probability that the observed match is a random event.

Individual ions scores  $> 33$  indicate identity or extensive homology ( $p < 0.05$ ).

Protein scores are derived from ions scores as a non-probabilistic basis for ranking protein hits.

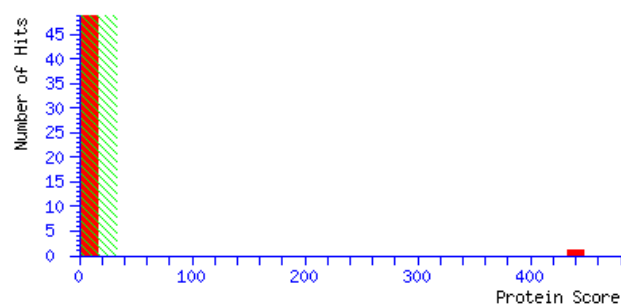



Spot No.: **114**

NCBI accession No.: *cassava4.1\_010105m*|PACid:17962148

Plant species: ***Manihot esculenta***

Protein name: **Malate dehydrogenase, cytoplasmic 1**

PFF Mascot score: **[349]**      Sequence coverage %: **[20]**

Matched peptides No.: **[6]**      p value: **1.4e-006**

Calculated Mr: 40924      Calculated pI: **7.08**

### Annotated PMF spectra:

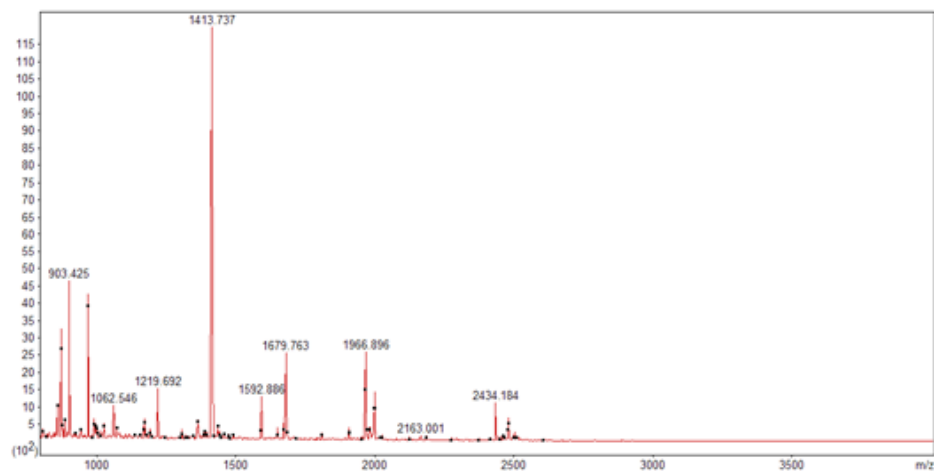

### PFF Searched Score:

Ions score is  $-10 \cdot \log(P)$ , where P is the probability that the observed match is a random event.

Individual ions scores  $> 34$  indicate identity or extensive homology ( $p < 0.05$ ).

Protein scores are derived from ions scores as a non-probabilistic basis for ranking protein hits.

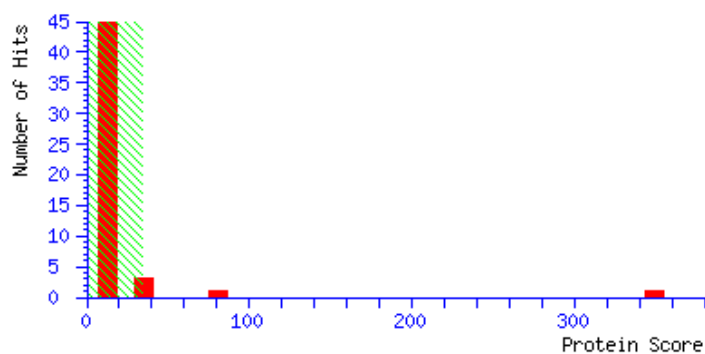

Spot No.: **115**

NCBI accession No.: *cassava4.1\_004280m*|PACid:17986008

Plant species: ***Manihot esculenta***

Protein name: **Leucine aminopeptidase 3, chloroplastic**

PFF Mascot score: **[399]**      Sequence coverage %: **[9]**

Matched peptides No.: **[4]**      p value: **2.5e-010**

Calculated Mr: 61349      Calculated pI: **6.69**

### Annotated PMF spectra:

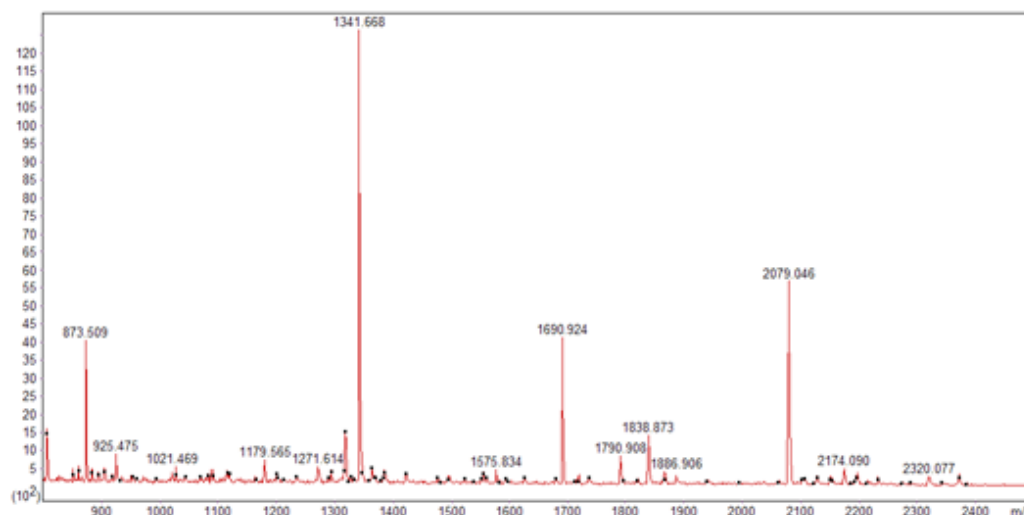

### PFF Searched Score:

Ions score is  $-10 \cdot \log(P)$ , where P is the probability that the observed match is a random event.

Individual ions scores  $> 33$  indicate identity or extensive homology ( $p < 0.05$ ).

Protein scores are derived from ions scores as a non-probabilistic basis for ranking protein hits.

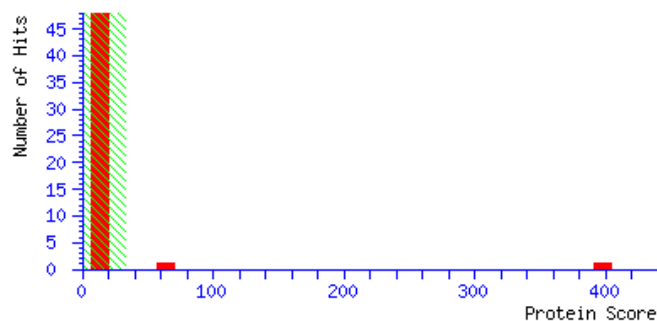

Spot No.: **116**

NCBI accession No.: *cassava4.1\_007673m*|PACid:17979089

Plant species: ***Manihot esculenta***

Protein name: **Bifunctional enolase 2/transcriptional activator**

PFF Mascot score: **[173]**      Sequence coverage %: **[9]**

Matched peptides No.: **[4]**      p value: **1.3e-008**

Calculated Mr: **48058**      Calculated pI: **5.86**

### Annotated PMF spectra:

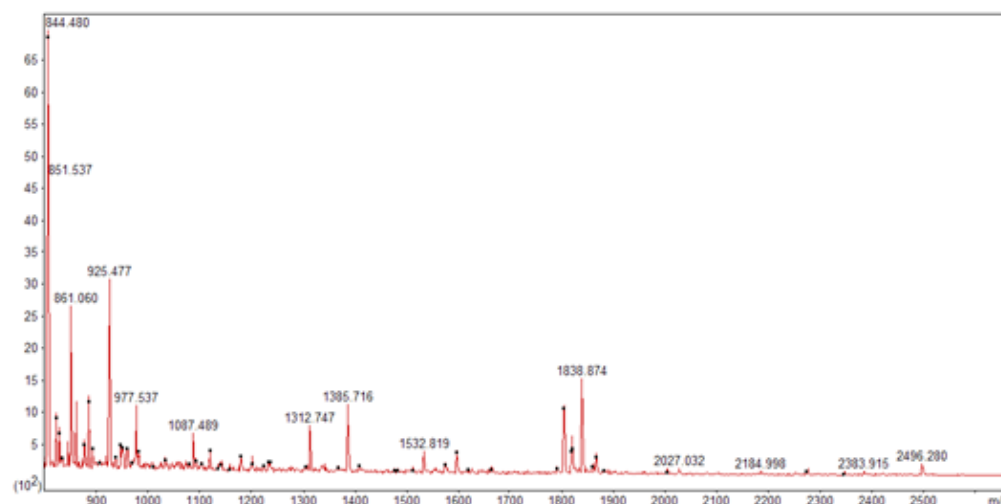

### PFF Searched Score:

Ions score is  $-10 \cdot \log(P)$ , where P is the probability that the observed match is a random event.

Individual ions scores  $> 34$  indicate identity or extensive homology ( $p < 0.05$ ).

Protein scores are derived from ions scores as a non-probabilistic basis for ranking protein hits.

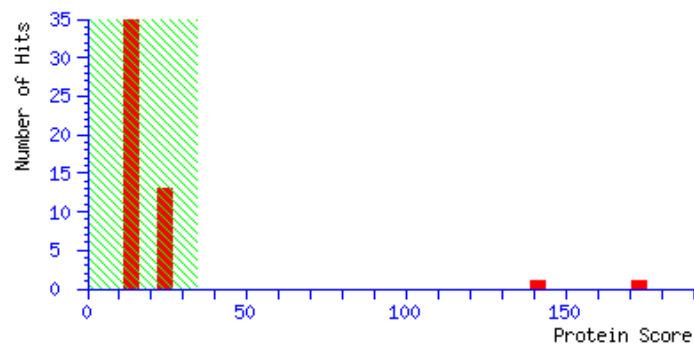

Spot No.: 117

NCBI accession No.: cassava4.1\_006024m|PACid:17974163

Plant species: *Manihot esculenta*

Protein name: **Betaine aldehyde dehydrogenase 1,  
chloroplastic**

PFF Mascot score: [345]      Sequence coverage %: [18]

Matched peptides No.: [5]      p value: **6.9e-013**

Calculated Mr: 55678      Calculated pI: **5.48**

### Annotated PMF spectra:

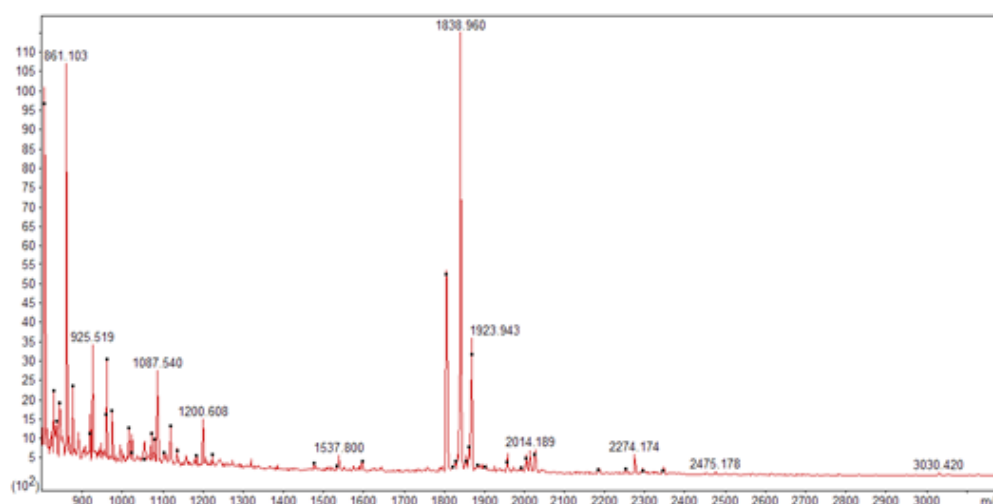

### PFF Searched Score:

Ions score is  $-10 \cdot \log(P)$ , where P is the probability that the observed match is a random event.

Individual ions scores  $> 33$  indicate identity or extensive homology ( $p < 0.05$ ).

Protein scores are derived from ions scores as a non-probabilistic basis for ranking protein hits.

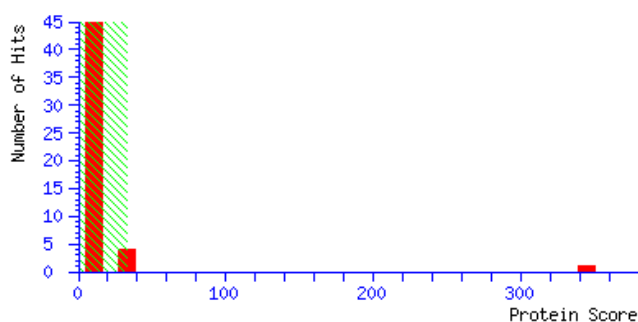

Spot No.: **118**

NCBI accession No.: *cassava4.1\_005314m*|PACid:17981128

Plant species: ***Manihot esculenta***

Protein name: **Ketol-acid reductoisomerase, chloroplastic**

PFF Mascot score: **[214]**      Sequence coverage %: **[9]**

Matched peptides No.: **[4]**      p value: **9.6e-005**

Calculated Mr: **58515**      Calculated pI: **5.50**

### Annotated PMF spectra:

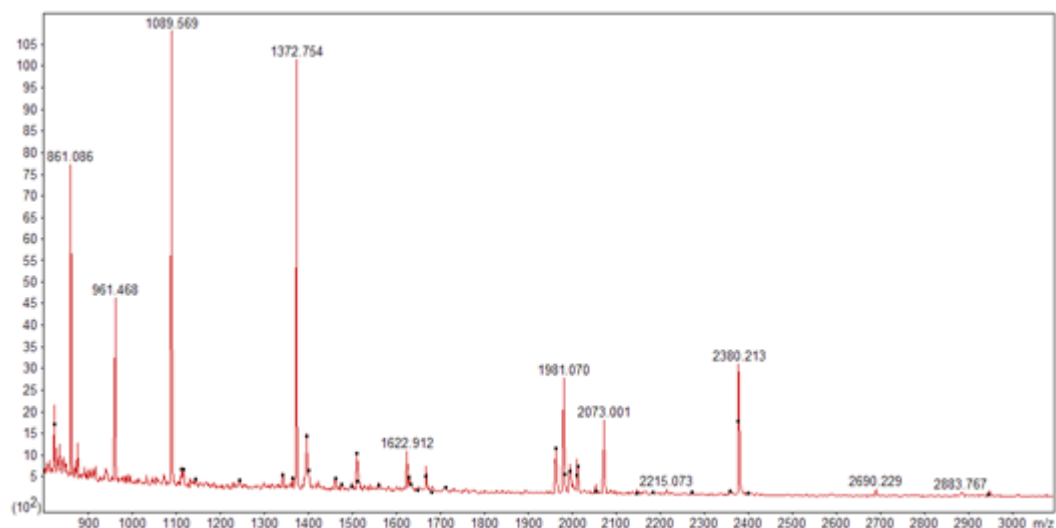

### PFF Searched Score:

Ions score is  $-10 \cdot \log(P)$ , where P is the probability that the observed match is a random event.

Individual ions scores > 33 indicate identity or extensive homology ( $p < 0.05$ ).

Protein scores are derived from ions scores as a non-probabilistic basis for ranking protein hits.

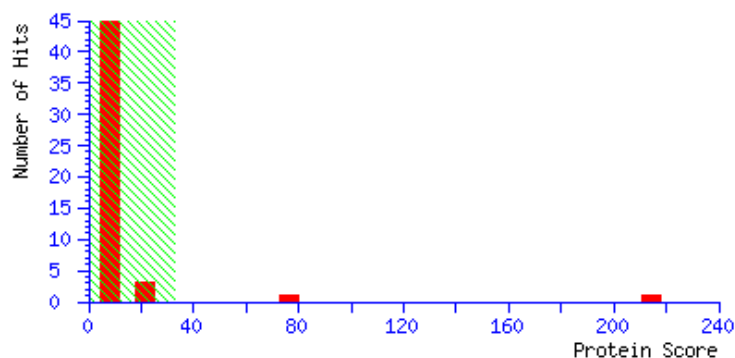

**Supplemental Figure S3:**  
**Supplemental spectra and MALDI TOF/TOF**  
**MS/MS identification information**

**Annotated spectra for the 80 proteins on DIGE gels**  
**identified by PMF and PFF.**

**CID:** collision induced dissociation

**MALDI TOF:**

matrix assisted laser desorption/ionization time of flight

**MS:** mass spectrometry

**PMF:** peptide mass fingerprinting

**PFF:** peptide fragment fingerprinting

Spot No.: 2

NCBI accession No.: *cassava4.1\_004263m*|PACid:17968763

Protein name: **Chaperonin 60 subunit alpha 1, chloroplastic**

Plant species: *Manihot esculenta*

Mascot score: **215**

Sequence coverage %: **47**

p value: **2.3e-017**

Matched peptides No.: **29**

Total peptides No.: **64**

Calculated Mr: 62302

Calculated pI: **5.34**

### Annotated PMF spectra:

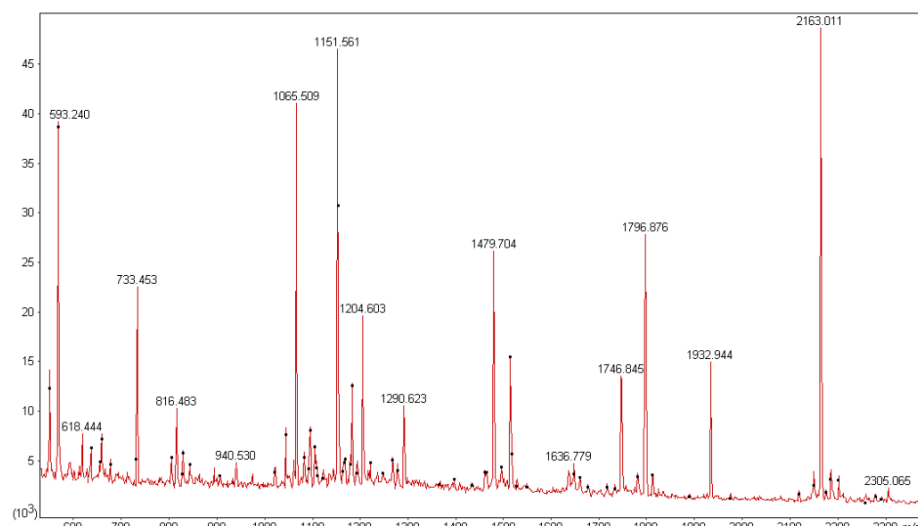

### Probability Based Mowse Score:

Protein score is  $-10 \cdot \log(P)$ , where  $P$  is the probability that the observed match is a random event. Protein scores greater than 61 are significant ( $p < 0.05$ ).

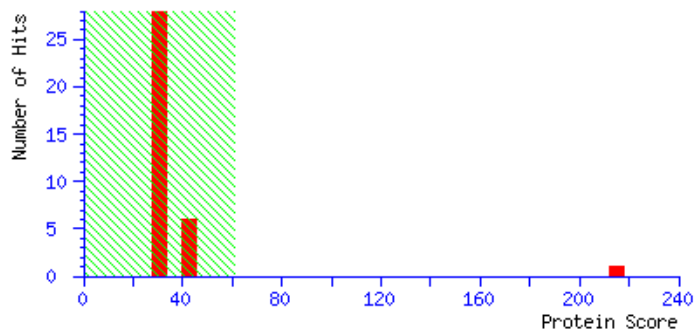

Spot No.: 5

NCBI accession No.: *cassava4.1\_007971m*|PACid:17991617

Protein name: **Tubulin alpha-6 chain**

Plant species: *Manihot esculenta* Mascot score: **101**

Sequence coverage %: **51** p value:  $5.8e-006$

Matched peptides No.: **15** Total peptides No.: **65**

Calculated Mr: 48294 Calculated pI: **4.95**

### Annotated PMF spectra:

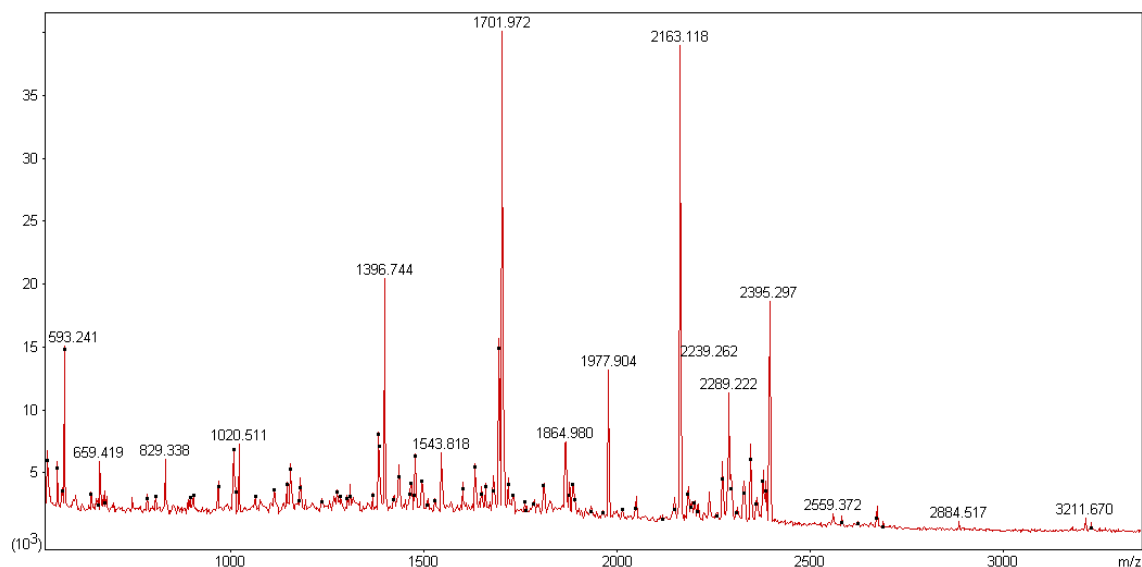

### Probability Based Mowse Score:

Protein score is  $-10 \cdot \log(P)$ , where P is the probability that the observed match is a random event. Protein scores greater than 61 are significant ( $p < 0.05$ ).

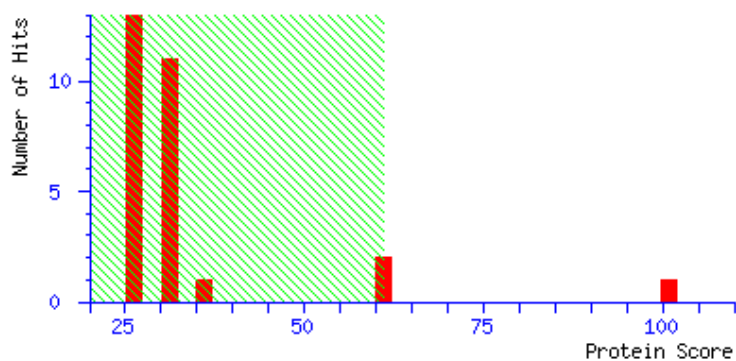



Spot No.: 6

NCBI accession No.: *cassava4.1\_008310m*|PACid:17966609

Protein name: **26S protease regulatory subunit 6A homolog A**

Plant species: *Manihot esculenta* Mascot score: 154

Sequence coverage %: 59 p value: 2.9e-11

Matched peptides No.: 29 Total peptides No.: 93

Calculated Mr: 47700 Calculated pI: 4.99

### Annotated PMF spectra:



### Probability Based Mowse Score:

Protein score is  $-10 \cdot \log(P)$ , where P is the probability that the observed match is a random event. Protein scores greater than 61 are significant ( $p < 0.05$ ).



Spot No.: **15**

NCBI accession No.: *cassava4.1\_007971m*|PACid:17991617

Protein name: **Tubulin alpha-6 chain**

Plant species: ***Manihot esculenta*** Mascot score: **103**

Sequence coverage %: **48** p value: 3.7e-006

Matched peptides No.: **18** Total peptides No.: **79**

Calculated Mr: **48294** Calculated *pl*: **4.95**

### Annotated PMF spectra:

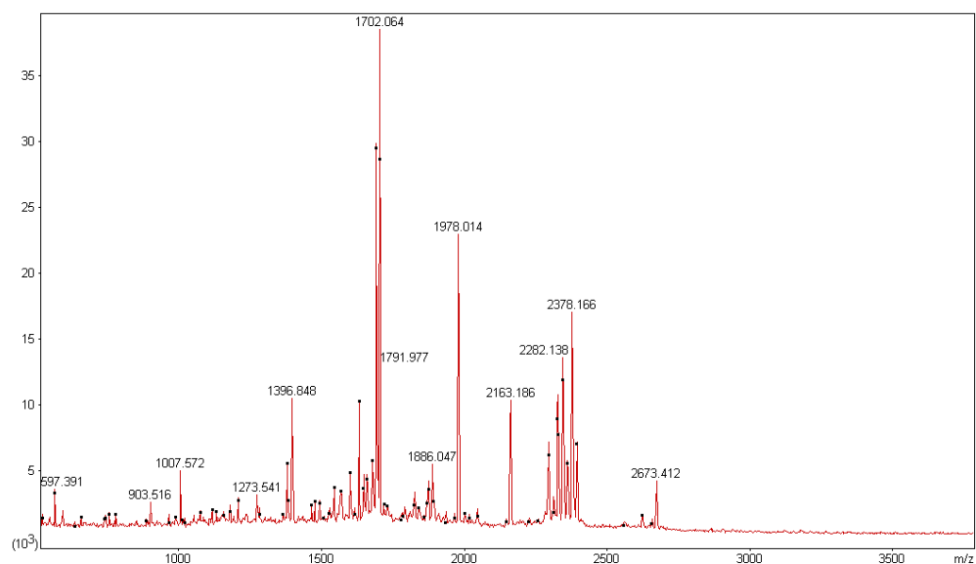

### Probability Based Mowse Score:

Protein score is  $-10 \cdot \log(P)$ , where  $P$  is the probability that the observed match is a random event. Protein scores greater than 61 are significant ( $p < 0.05$ ).

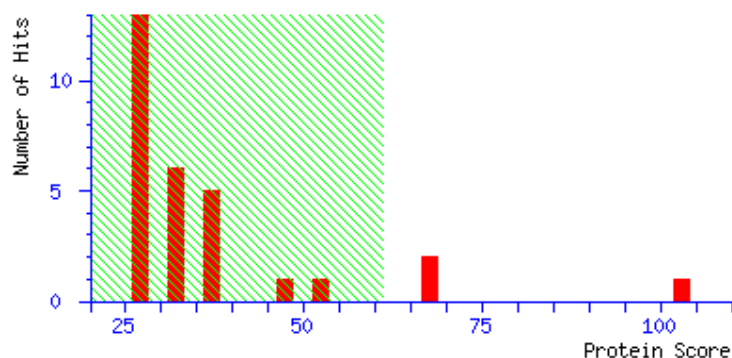



Spot No.: **21**

NCBI accession No.: **cassava4.1\_008086m|PACid:17989319**

Plant species: ***Manihot esculenta***

Protein name: **Glutamine synthetase cytosolic isozyme 1-1**

Mascot score: **101**

Sequence coverage %: **33**      p value: **5.8e-006**

Matched peptides No.: **14**      Total peptides No.: **54**

Calculated Mr: **47502**      Calculated pI: **6.27**

### Annotated PMF spectra:

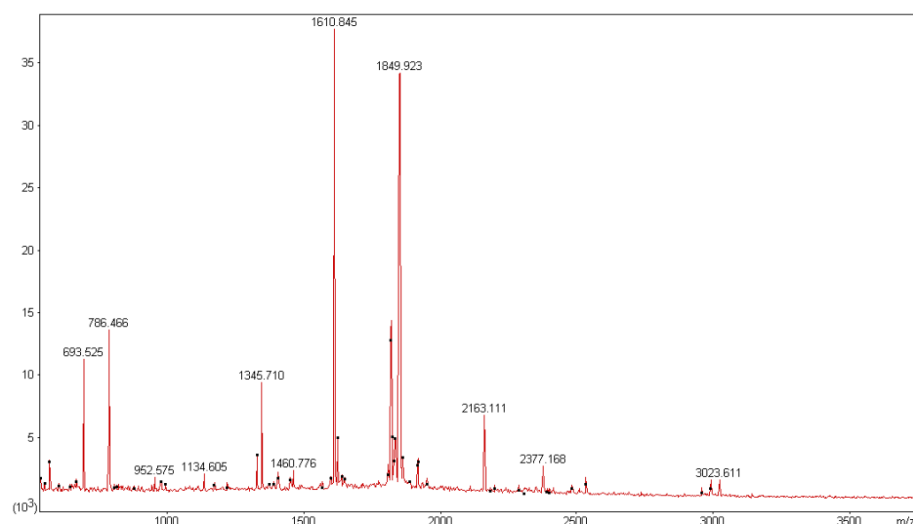

### Probability Based Mowse Score:

Protein score is  $-10 \cdot \log(P)$ , where P is the probability that the observed match is a random event. Protein scores greater than 61 are significant ( $p < 0.05$ ).

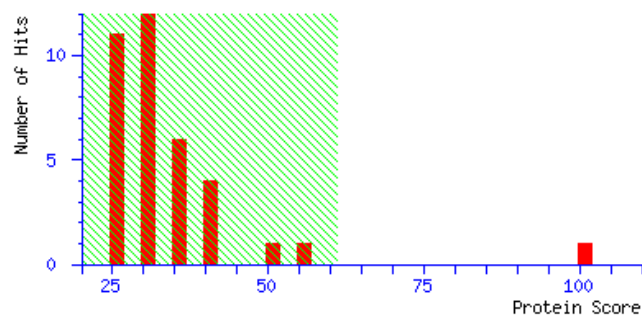

Spot No.: **23**

NCBI accession No.: *cassava4.1\_033108m*|PACid:17973616

Plant species: ***Manihot esculenta***

Protein name: **Actin-7**

Mascot score: **93**

Sequence coverage %: **52**

p value:  $3.4e-005$

Matched peptides No.: **18**

Total peptides No.: **87**

Calculated Mr: **41897**

Calculated pI: **5.31**

### Annotated PMF spectra:

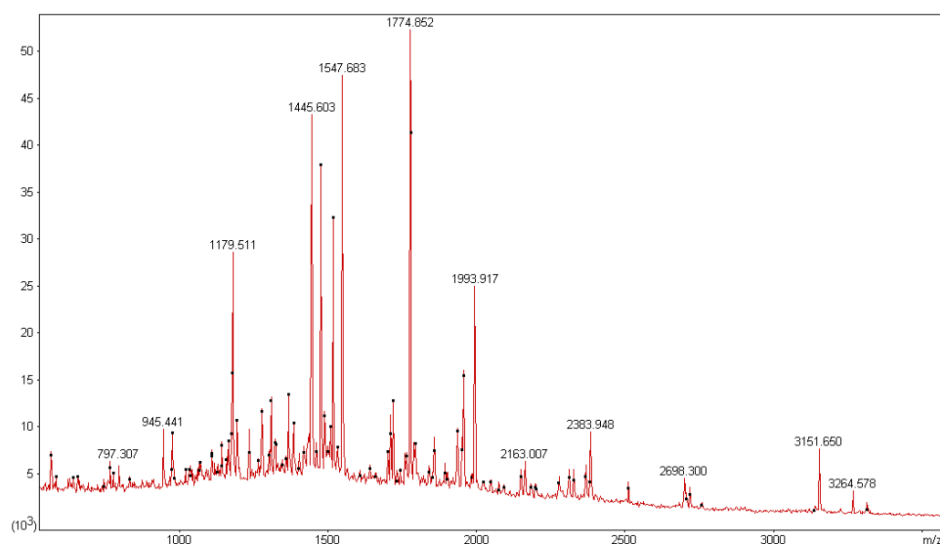

### Probability Based Mowse Score:

Protein score is  $-10 \cdot \log(P)$ , where P is the probability that the observed match is a random event. Protein scores greater than 61 are significant ( $p < 0.05$ ).

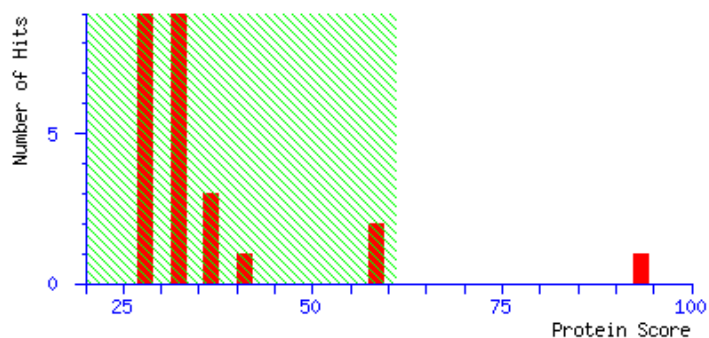

Spot No.: 27

NCBI accession No.: cassava4.1\_011177m|PACid:17972447

Protein name: Adenosine kinase 1 Plant species: *Manihot esculenta*

PFF Mascot score: [113]

Sequence coverage %: [7]

Matched peptides No.: [2]

p value: 3.1e-006

Calculated Mr: 38107

Calculated pI: 5.38

### Annotated PMF spectra:

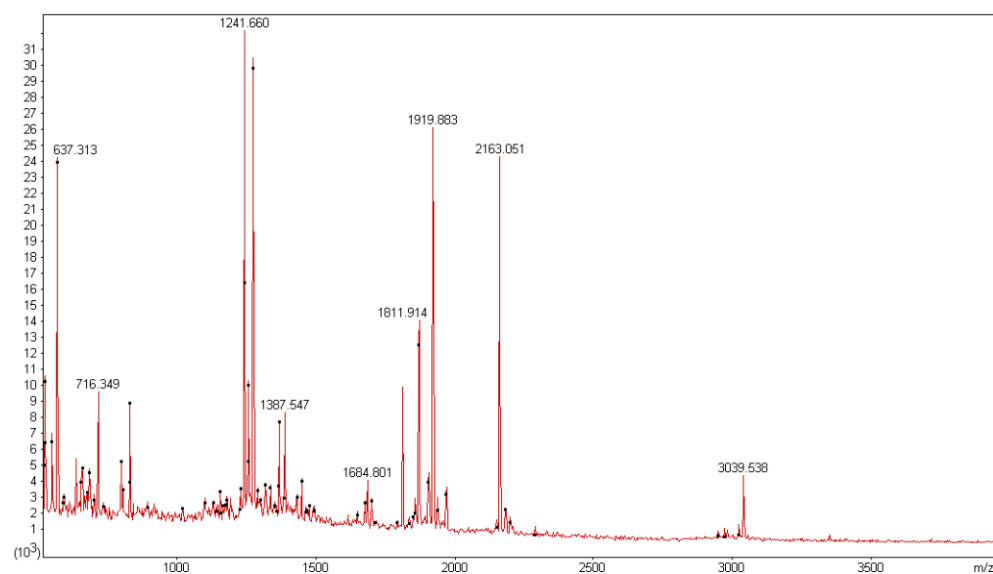

### PFF Searched Score:

Ions score is  $-10 \cdot \log(P)$ , where P is the probability that the observed match is a random event.

Individual ions scores  $> 33$  indicate identity or extensive homology ( $p < 0.05$ ).

Protein scores are derived from ions scores as a non-probabilistic basis for ranking protein hits.

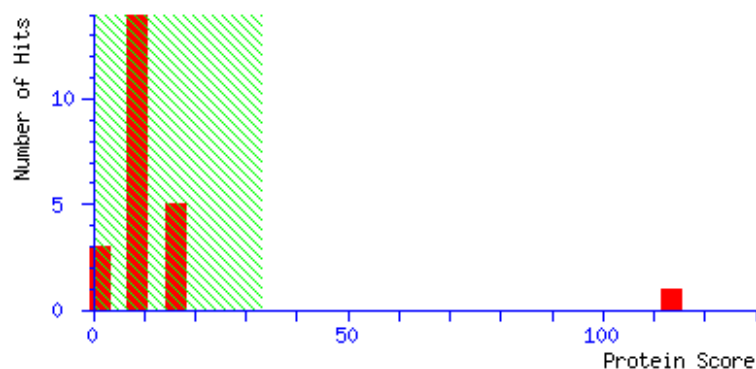

Spot No.: **28**

NCBI accession No.: *cassava4.1\_002747m*|PACid:17960141

Plant species: ***Manihot esculenta***

Protein name: **Heat shock protein 90-3** Mascot score: **127**

Sequence coverage %: **37** p value:  $1.5e-008$

Matched peptides No.: **33**

Total peptides No.: **77**

Calculated Mr: **80250**

Calculated pI: **4.99**

### Annotated PMF spectra:

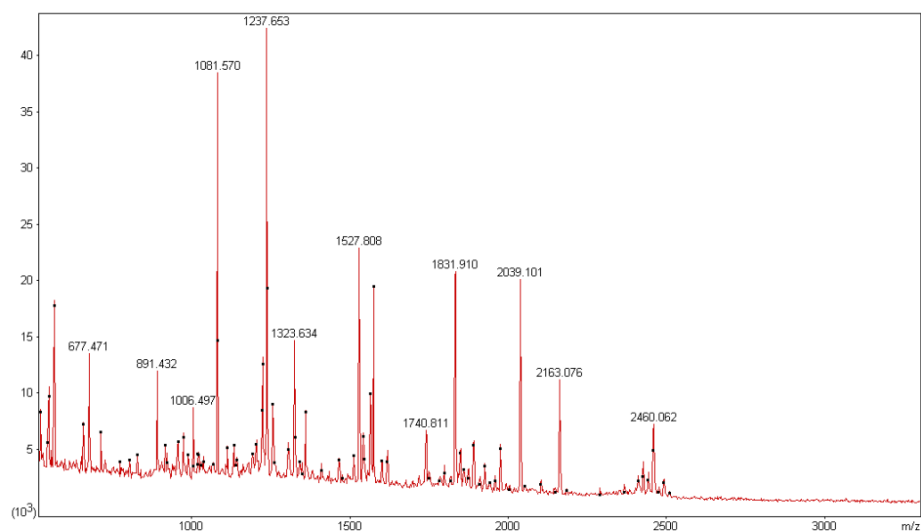

### Probability Based Mowse Score:

Protein score is  $-10 \cdot \log(P)$ , where P is the probability that the observed match is a random event. Protein scores greater than 61 are significant ( $p < 0.05$ ).

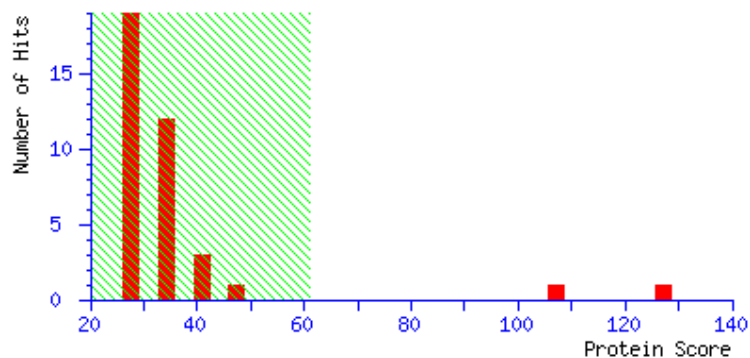

Spot No.: **29**

NCBI accession No.: *cassava4.1\_002466m*|PACid:17978799

Plant species: ***Manihot esculenta***

Protein name: **Alpha-glucan phosphorylase 1**

Mascot score: **81**

Sequence coverage %: **24**      p value: **0.00058**

Matched peptides No.: **24**      Total peptides No.: **95**

Calculated Mr: **81918**      Calculated pI: **8.50**

### Annotated PMF spectra:

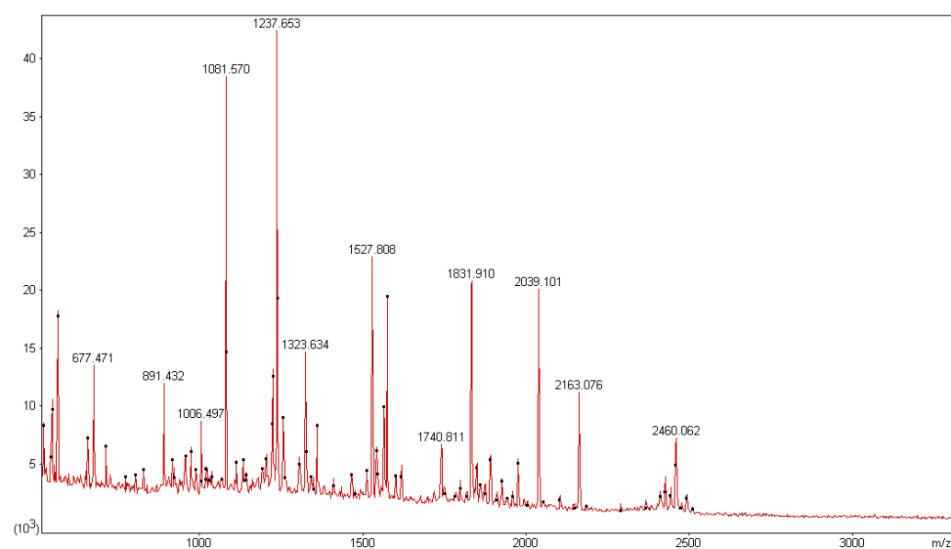

### Probability Based Mowse Score:

Protein score is  $-10 \cdot \log(P)$ , where P is the probability that the observed match is a random event. Protein scores greater than 61 are significant ( $p < 0.05$ ).

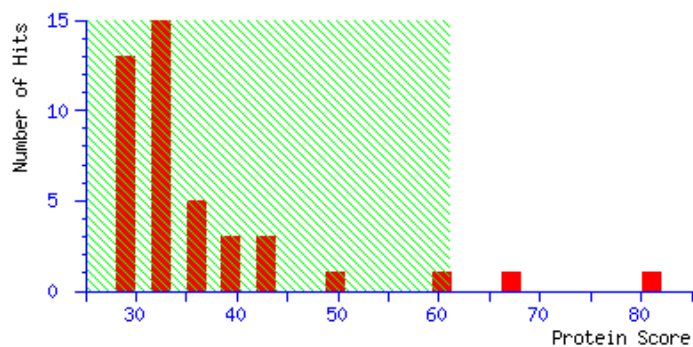



Spot No.: **30**

NCBI accession No.: *cassava4.1\_002466m*[PACid:17978799]

Plant species: **Manihot esculenta**

Protein name: **Alpha-glucan phosphorylase 1**

PFF Mascot score: **[387]** Sequence coverage %: **[12]**

Matched peptides No.: **[7]** p value: 3.5e-008

Calculated Mr: 81918

Calculated pI: **8.50**

### Annotated PMF spectra:



### PFF Searched Score:

Ions score is  $-10 \cdot \log(P)$ , where P is the probability that the observed match is a random event.

Individual ions scores  $> 33$  indicate identity or extensive homology ( $p < 0.05$ ).

Protein scores are derived from ions scores as a non-probabilistic basis for ranking protein hits.

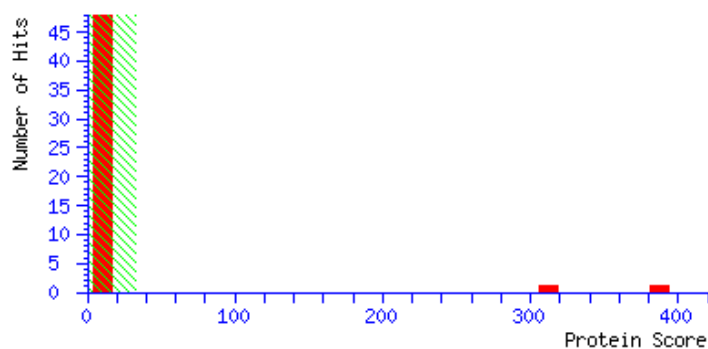

Spot No.: **31**

NCBI accession No.: *cassava4.1\_002614m*|PACid:17978880

Plant species: ***Manihot esculenta***

Protein name: **Alpha-glucan phosphorylase 1**

Mascot score: **76**                      p value: **0.019**

Sequence coverage %: **32**

Matched peptides No.: **16**                      Total peptides No.: **58**

Calculated Mr: **80611**                      Calculated pI: **6.71**

### Annotated PMF spectra:

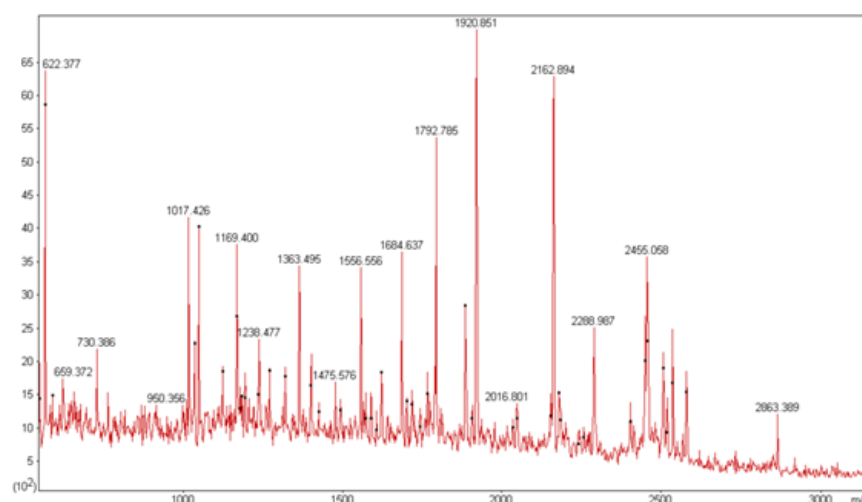

### Probability Based Mowse Score:

Protein score is  $-10 \cdot \log(P)$ , where P is the probability that the observed match is a random event. Protein scores greater than 61 are significant ( $p < 0.05$ ).

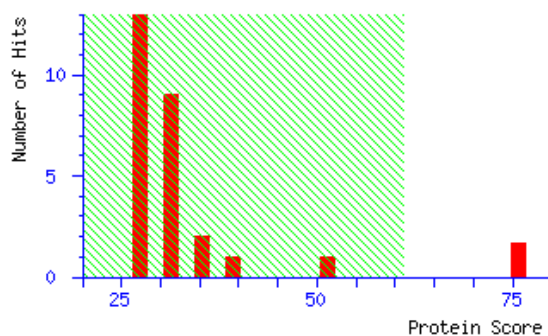

Spot No.: **34**

NCBI accession No.: *cassava4.1\_014251m*|PACid:17989805

Plant species: ***Manihot esculenta*** Mascot score: **115**

Protein name: **14-3-3-like protein GF14 omega**

Sequence coverage %: **44** p value: **2.3e-007**

Matched peptides No.: **16** Total peptides No.: **46**

Calculated Mr: **29447** Calculated pI: **4.77**

### Annotated PMF spectra:

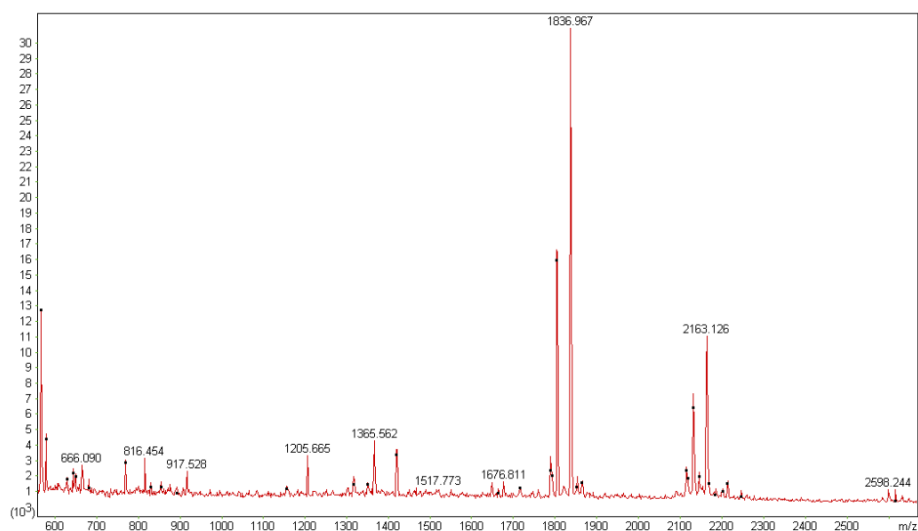

### Probability Based Mowse Score:

Protein score is  $-10 \cdot \log(P)$ , where P is the probability that the observed match is a random event. Protein scores greater than 61 are significant ( $p < 0.05$ ).

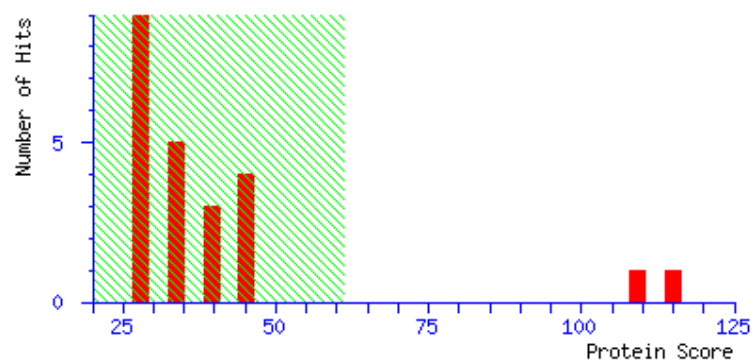

Spot No.: **35**

NCBI accession No.: *cassava4.1\_014208m*|PACid:17964823

Plant species: *Manihot esculenta*

Protein name: **14-3-3-like protein GF14 omega**

Mascot score: **159**                      p value: **9.2e-012**

Sequence coverage %: **54**

Matched peptides No.: **21**                      Total peptides No.: **56**

Calculated Mr: **29548**                      Calculated pI: **4.76**

### Annotated PMF spectra:

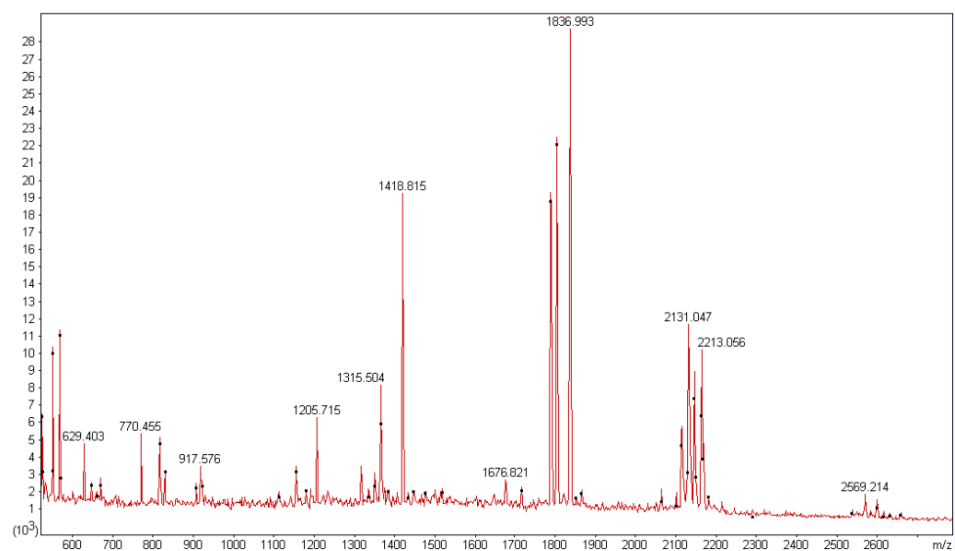

### Probability Based Mowse Score:

Protein score is  $-10 \cdot \log(P)$ , where P is the probability that the observed match is a random event. Protein scores greater than 61 are significant ( $p < 0.05$ ).

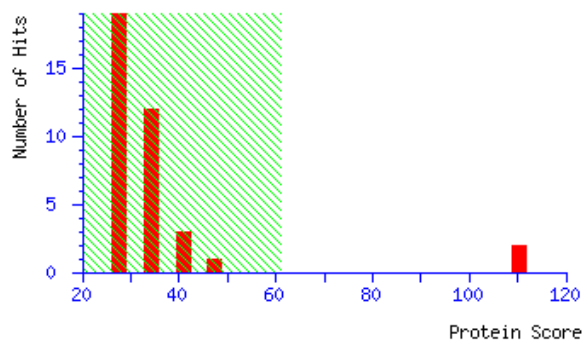

Spot No.: **36**

NCBI accession No.: *cassava4.1\_014065m|PACid:17989625*

Plant species: *Manihot esculenta*

Protein name: **14-3-3-like protein GF14 psi**

Mascot score: **111**                      p value: **0.0000058**

Sequence coverage %: **60**

Matched peptides No.: **16**                      Total peptides No.: **67**

Calculated Mr: **29928**                      Calculated pI: **4.75**

### Annotated PMF spectra:



### Probability Based Mowse Score:

Protein score is  $-10 \cdot \log(P)$ , where P is the probability that the observed match is a random event. Protein scores greater than 61 are significant ( $p < 0.05$ ).

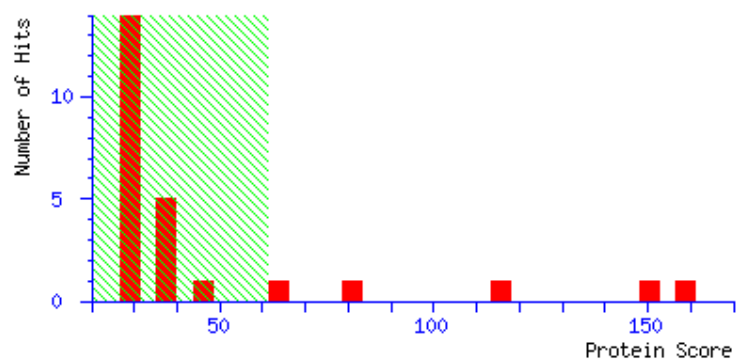

Spot No.: **39**

NCBI accession No.: *cassava4.1\_013158m*|PACid:17968853 p value: **0.0017**

Plant species: ***Manihot esculenta*** Mascot score: **151**

Protein name: **Probable lactoylglutathione lyase, chloroplast**

Sequence coverage %: **55** p value: **5.8e-011**

Matched peptides No.: **19**

Total peptides No.: **77**

Calculated Mr: **32759**

Calculated pI: **5.17**

### Annotated PMF spectra:

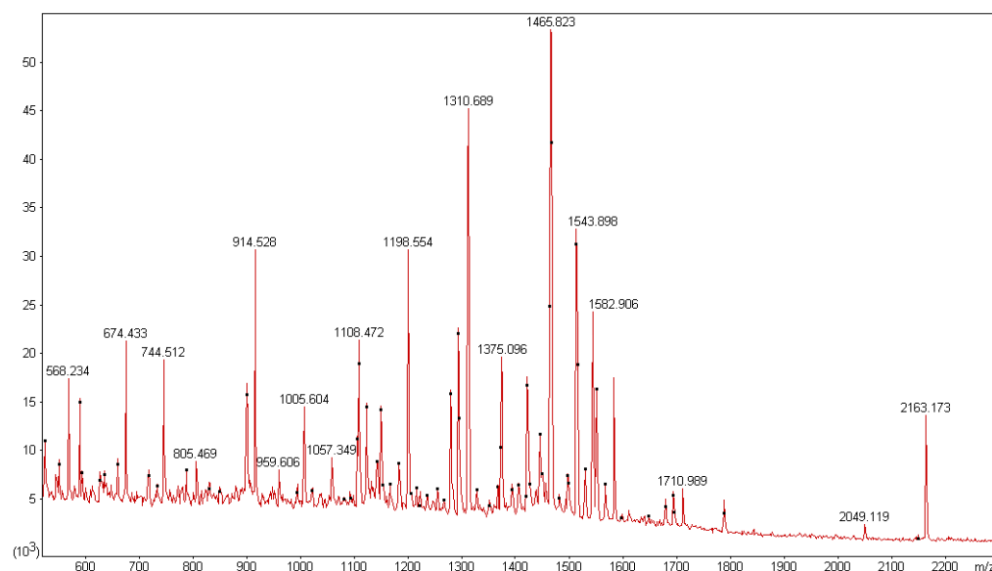

### Probability Based Mowse Score:

Protein score is  $-10 \cdot \log(P)$ , where P is the probability that the observed match is a random event. Protein scores greater than 61 are significant ( $p < 0.05$ ).

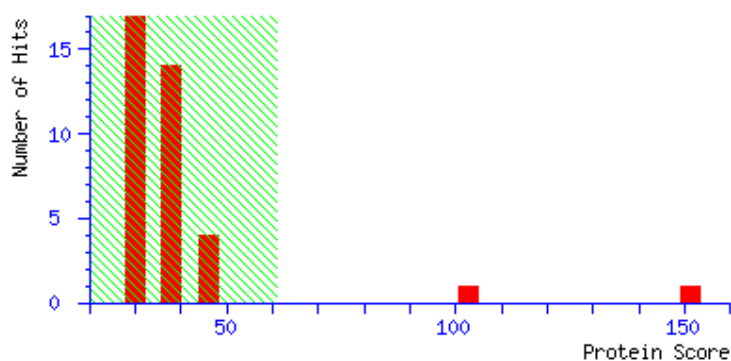

Spot No.: **40**

NCBI accession No.: *cassava4.1\_013158m*|PACid:17968853

Plant species: ***Manihot esculenta***

Protein name: **Probable lactoylglutathione lyase, chloroplast**

PFF Mascot score: **[73]**      Sequence coverage %: **[7]**

Matched peptides No.: **[2]**      p value: 6.1e-006

Calculated Mr: **32759**      Calculated pI: **5.17**

### Annotated PMF spectra:

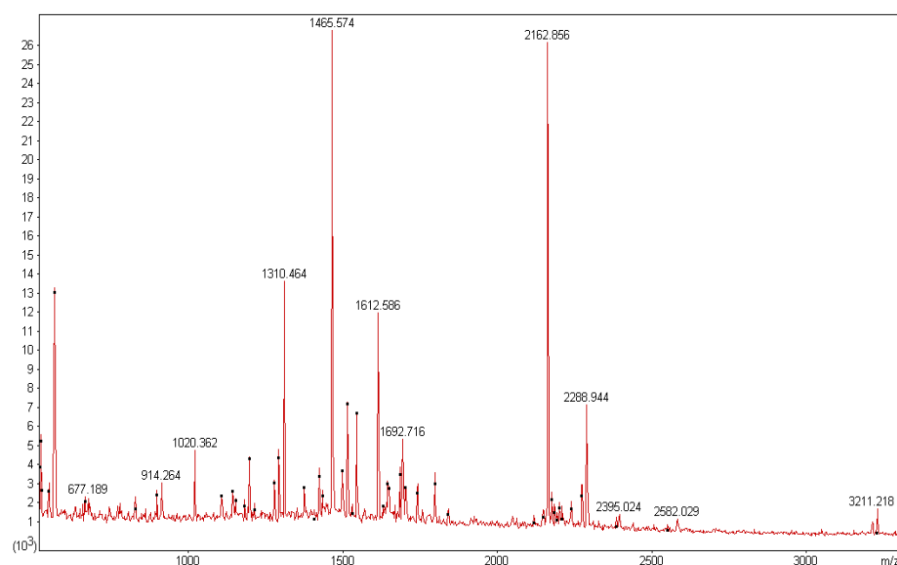

### PFF Searched Score:

Ions score is  $-10 \cdot \log(P)$ , where P is the probability that the observed match is a random event.

Individual ions scores  $> 33$  indicate identity or extensive homology ( $p < 0.05$ ).

Protein scores are derived from ions scores as a non-probabilistic basis for ranking protein hits.

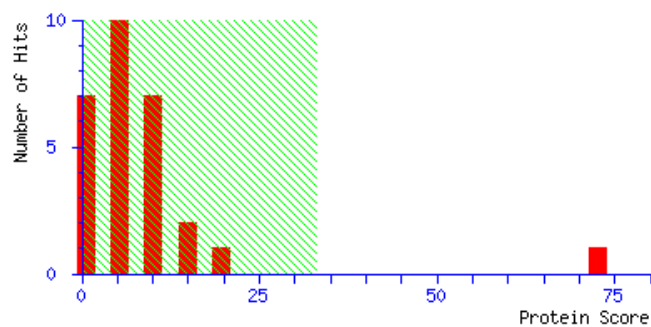

Spot No.: **42**

NCBI accession No.: *cassava4.1\_011578m|PACid:17975802*

Plant species: ***Manihot esculenta***

Protein name: **Probable fructokinase-1**

PFF Mascot score: **[146]**

Sequence coverage %: **[11]**

Matched peptides No.: **[3]**

p value: **0.00019**

Calculated Mr: **35491**

Calculated pI: **5.29**

### Annotated PMF spectra:

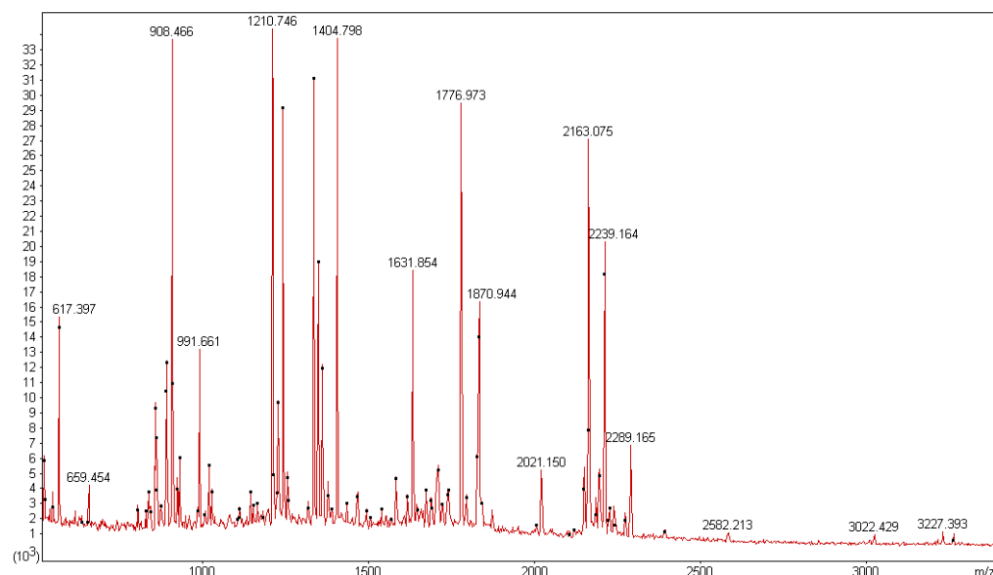

### PFF Searched Score:

Ions score is  $-10 \cdot \log(P)$ , where P is the probability that the observed match is a random event.

Individual ions scores  $> 33$  indicate identity or extensive homology ( $p < 0.05$ ).

Protein scores are derived from ions scores as a non-probabilistic basis for ranking protein hits.

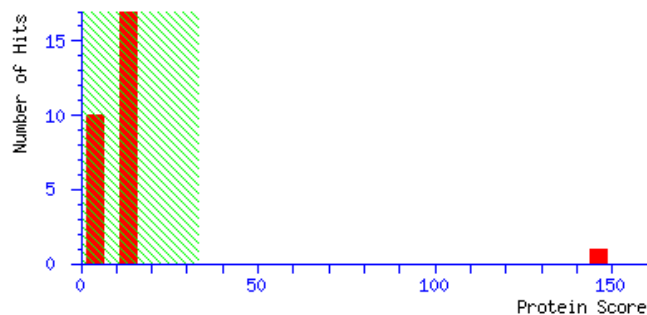



Spot No.: **44**

NCBI accession No.: *cassava4.1\_010863m*|PACid:17977552

Plant species: ***Manihot esculenta***

Protein name: **NADP-dependent alkenal double bond reductase**

PFF Mascot score: **[99]**      Sequence coverage %: **[7]**

Matched peptides No.: **[2]**      p value: **7.3e-008**

Calculated Mr: **38818**      Calculated pI: **5.41**

### Annotated PMF spectra:

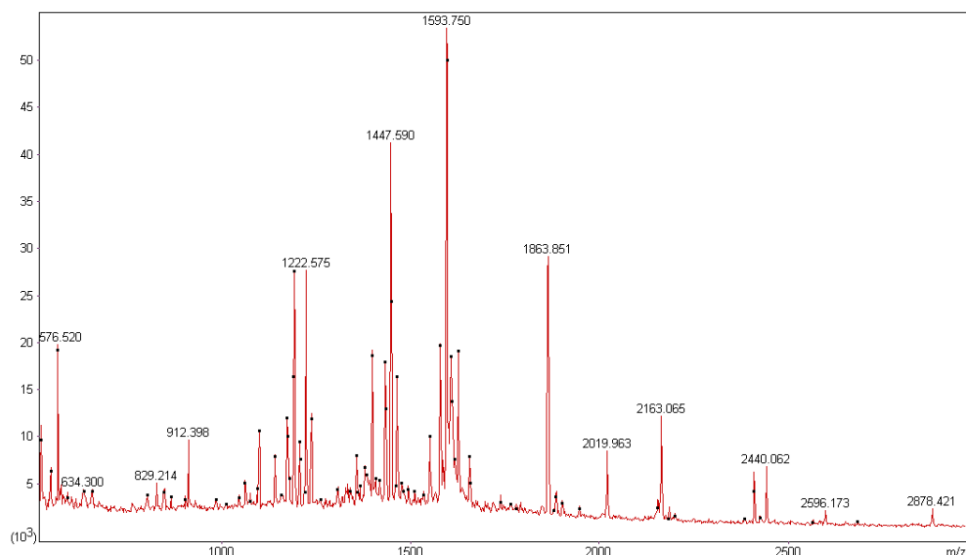

### PFF Searched Score:

Ions score is  $-10 \cdot \log(P)$ , where P is the probability that the observed match is a random event.

Individual ions scores  $> 33$  indicate identity or extensive homology ( $p < 0.05$ ).

Protein scores are derived from ions scores as a non-probabilistic basis for ranking protein hits.

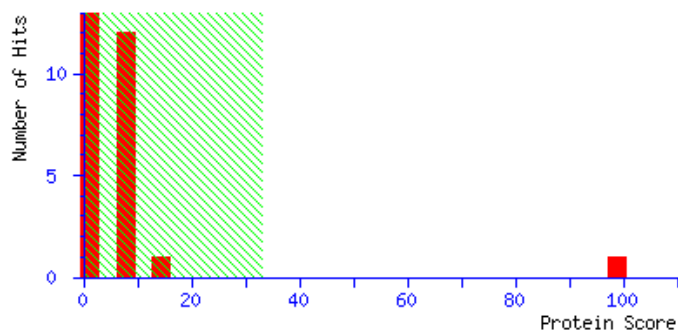

Spot No.: **46**

NCBI accession No.: *cassava4.1\_012448m*|PACid:17968446 Plant species:

***Manihot esculenta*** Protein name: **Putative NAD(P)H oxidoreductase, isoflavone reductase**

PFF Mascot score: **[254]** Sequence coverage %: **[15]**

Matched peptides No.: **[3]** p value: **4.7e-012**

Calculated Mr: 33873 Calculated pI: **5.47**

### Annotated PMF spectra:

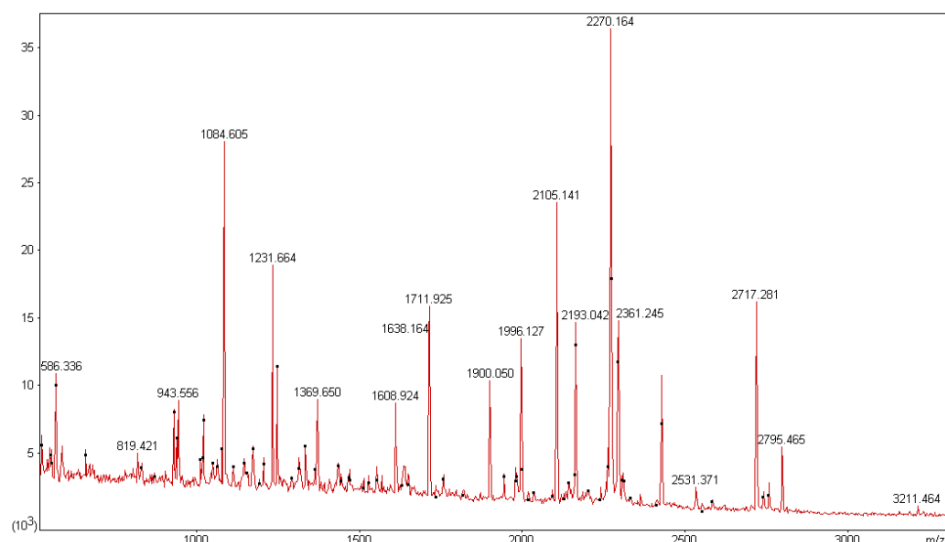

PFF Searched Score:

Ions score is  $-10 \cdot \log(P)$ , where  $P$  is the probability that the observed match is a random event. Individual ions scores  $> 32$  indicate identity or extensive homology ( $p < 0.05$ ). Protein scores are derived from ions scores as a non-probabilistic basis for ranking protein hits.



Spot No.: 47

NCBI accession No.: cassava4.1\_010620m|PACid:17987783

Plant species: *Manihot esculenta*

Protein name: **Thiamine thiazole synthase, chloroplastic**

**PFF Mascot score: [133]      Sequence coverage %: [8]**

Matched peptides No.: [2]                      p value: **6.7e-006**

Calculated Mr: **37625**                      Calculated pI: **6.07**

### Annotated PMF spectra:

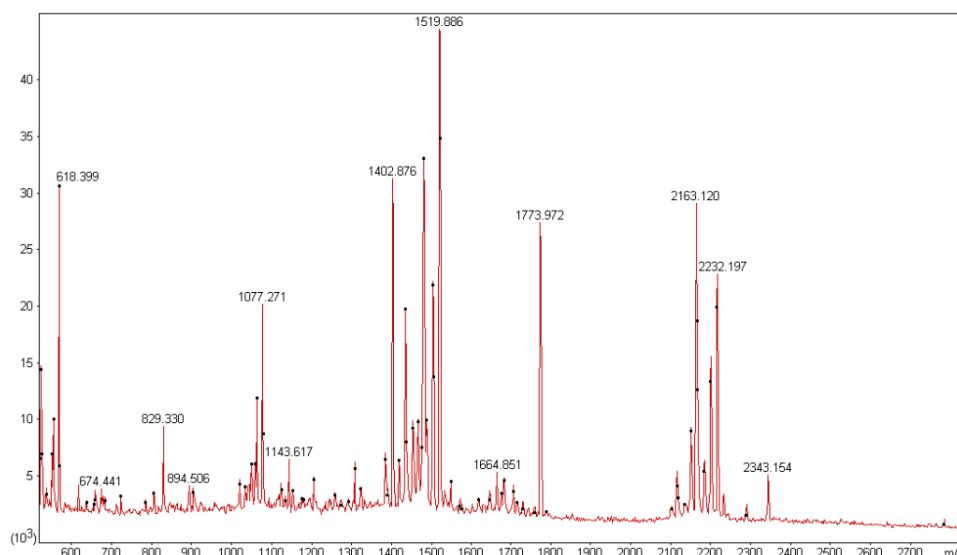

### PFF Searched Score:

Ions score is  $-10 \cdot \log(P)$ , where P is the probability that the observed match is a random event.

Individual ions scores  $> 33$  indicate identity or extensive homology ( $p < 0.05$ ).

Protein scores are derived from ions scores as a non-probabilistic basis for ranking protein hits.



Spot No.: **49**

NCBI accession No.: **cassava4.1\_014185m|PACid:17964106**

Plant species: ***Manihot esculenta***

Protein name: **Ferritin-4, chloroplastic**

Mascot score: **125**

Sequence coverage %: **61**      p value: **2.3e-008**

Matched peptides No.: **18**                      Total peptides No.: **68**

Calculated Mr: **29470**                      Calculated pI: **5.30**

### Annotated PMF spectra:

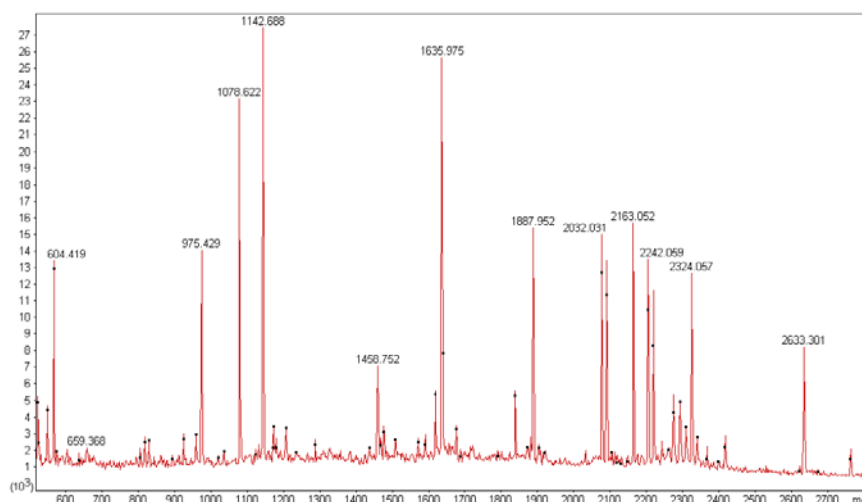

### Probability Based Mowse Score:

Protein score is  $-10 \cdot \log(P)$ , where P is the probability that the observed match is a random event. Protein scores greater than 61 are significant ( $p < 0.05$ ).



Spot No.: **50**

NCBI accession No.: *cassava4.1\_014410m*|PACid:17965277

Plant species: ***Manihot esculenta***

Protein name: **20 kDa chaperonin, chloroplastic**

PFF Mascot score: **[172]**      Sequence coverage %: **[21]**

Matched peptides No.: **[3]**      p value: **5e-005**

Calculated Mr: **26695**      Calculated pI: **7.79**

### Annotated PMF spectra:

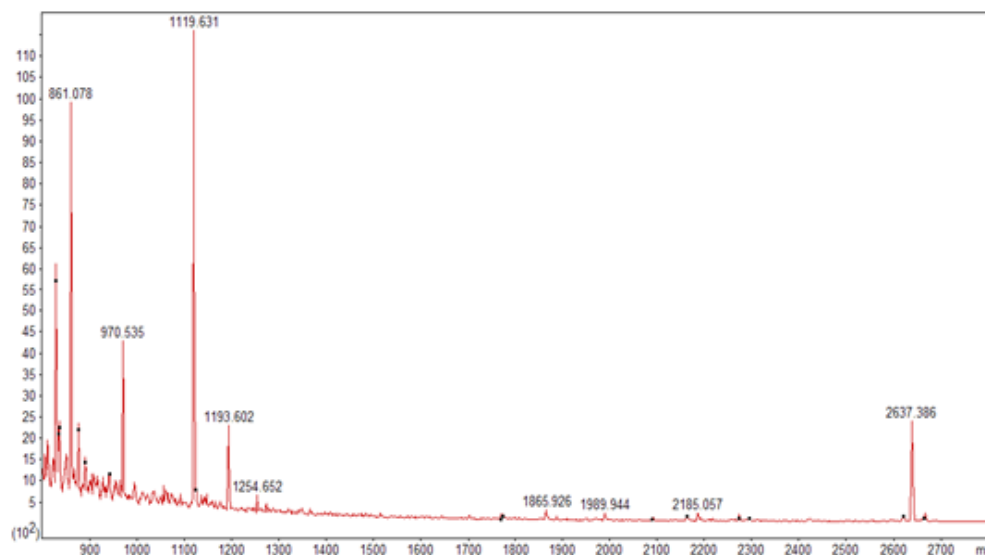

### PFF Searched Score:

Ions score is  $-10 \cdot \log(P)$ , where P is the probability that the observed match is a random event.

Individual ions scores  $> 33$  indicate identity or extensive homology ( $p < 0.05$ ).

Protein scores are derived from ions scores as a non-probabilistic basis for ranking protein hits.

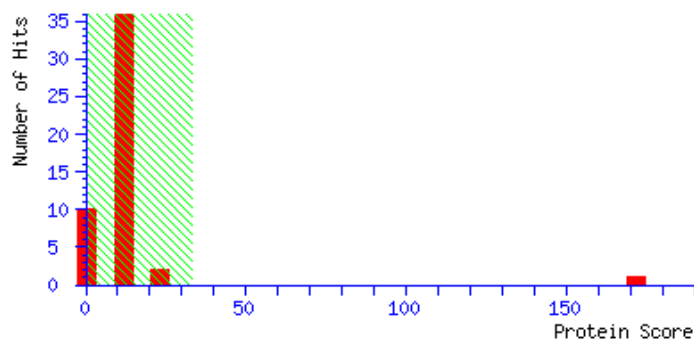

Spot No.: **51**

NCBI accession No.: *cassava4.1\_014643m*|PACid:17991662

Plant species: ***Manihot esculenta***

Protein name: **L-ascorbate peroxidase 1, cytosolic**

Mascot score: **82**      p value: 0.00046

Sequence coverage %: **40**      Matched peptides No.: **13**

Calculated Mr: **27766**      Calculated pI: **5.31**

### Annotated PMF spectra:

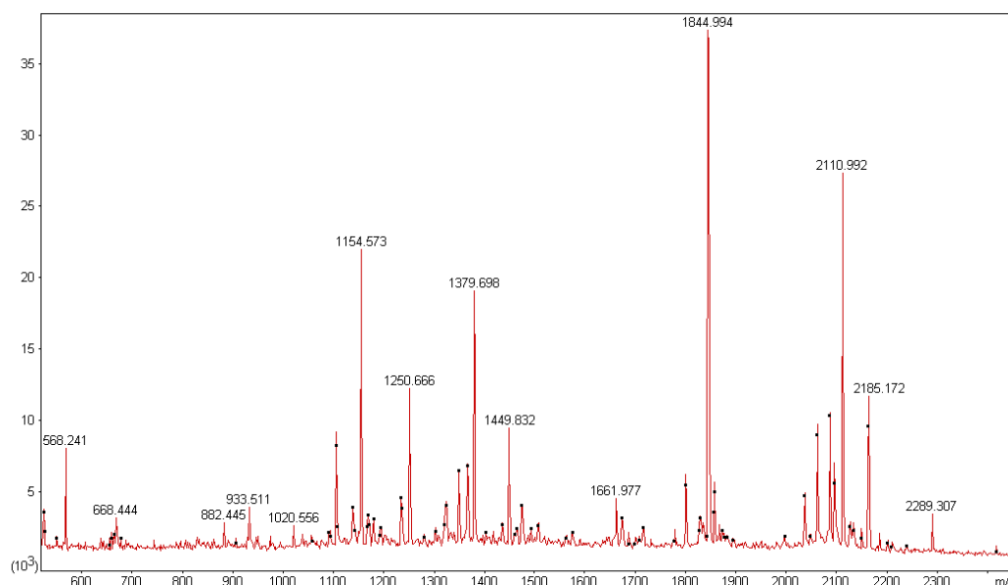

### Probability Based Mowse Score:

Protein score is  $-10 \cdot \log(P)$ , where P is the probability that the observed match is a random event. Protein scores greater than 61 are significant ( $p < 0.05$ ).



Spot No.: **53**

NCBI accession No.: *cassava4.1\_009779m*|PACid:17990964

Plant species: ***Manihot esculenta***

Protein name: **Actin-7**

**PFF Mascot score: [96]**

**Sequence coverage %: [7]**

Matched peptides No.: **[2]**

p value: **0.00065**

Calculated Mr: 41897

Calculated pI: **5.31**

### Annotated PMF spectra:

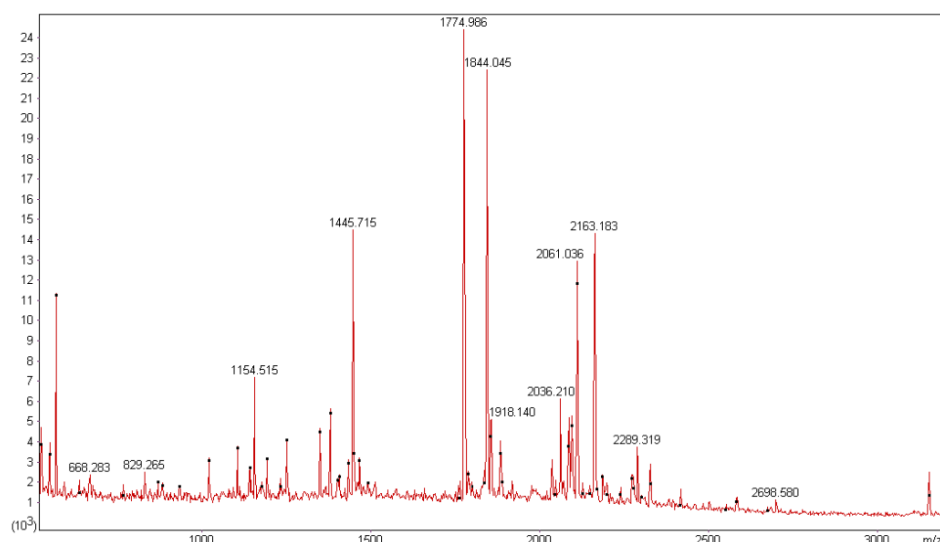

### PFF Searched Score:

Ions score is  $-10 \cdot \log(P)$ , where  $P$  is the probability that the observed match is a random event.

Individual ions scores  $> 33$  indicate identity or extensive homology ( $p < 0.05$ ).

Protein scores are derived from ions scores as a non-probabilistic basis for ranking protein hits.



Spot No.: **57**

NCBI accession No.: **cassava4.1\_017832m|PACid:17961591**

Plant species: ***Manihot esculenta***

Protein name: **regulator of ribonuclease activity a**

**PFF Mascot score: [133] Sequence coverage %: [16]**

Matched peptides No.: **[2]** p value: **8.1e-007**

Calculated Mr: 18015

Calculated pI: **5.39**

### **Annotated PMF spectra:**



### **PFF Searched Score:**

Ions score is  $-10 \cdot \log(P)$ , where P is the probability that the observed match is a random event.

Individual ions scores  $> 33$  indicate identity or extensive homology ( $p < 0.05$ ).

Protein scores are derived from ions scores as a non-probabilistic basis for ranking protein hits.





Spot No.: **58**

NCBI accession No.: *cassava4.1\_018059m*|PACid:17963195

Plant species: ***Manihot esculenta***

Protein name: **Eukaryotic translation initiation factor 5A-2**

**PFF Mascot score: [66]      Sequence coverage %: [18]**

Matched peptides No.: [2]      p value: **0.00026**

Calculated Mr: **17706**      Calculated pI: **5.60**

### Annotated PMF spectra:

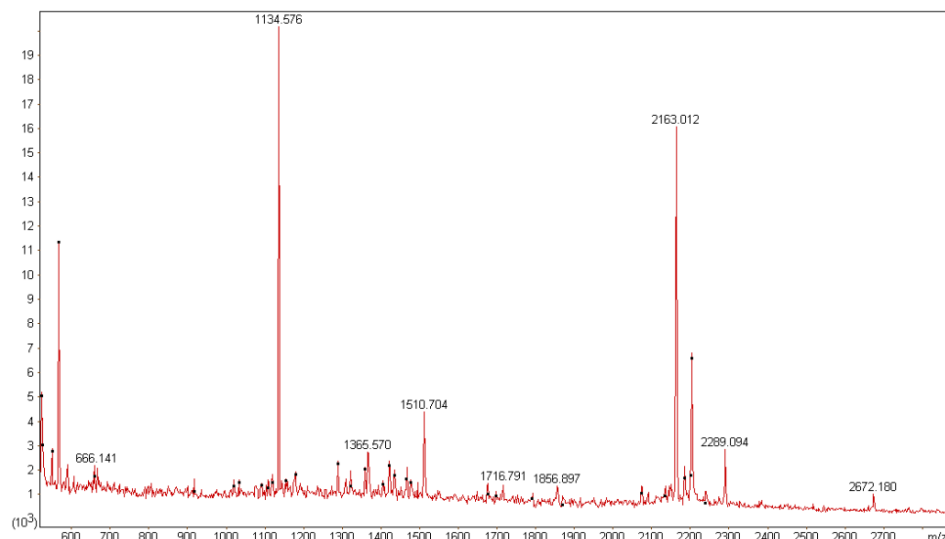

### PFF Searched Score:

Ions score is  $-10 \cdot \log(P)$ , where P is the probability that the observed match is a random event.

Individual ions scores  $> 33$  indicate identity or extensive homology ( $p < 0.05$ ).

Protein scores are derived from ions scores as a non-probabilistic basis for ranking protein hits.



Spot No.: **61**

NCBI accession No.: **cassava4.1\_018737m|PACid:17986123**

Plant species: ***Manihot esculenta***

Protein name: **Actin-depolymerizing factor 3**

**PFF Mascot score: [112] Sequence coverage %: [11]**

Matched peptides No.: **[2]** p value: **5.3e-010**

Calculated Mr: **16253** Calculated pI: **6.60**

### Annotated PMF spectra:



### PFF Searched Score:

Ions score is  $-10 \cdot \log(P)$ , where P is the probability that the observed match is a random event.

Individual ions scores  $> 32$  indicate identity or extensive homology ( $p < 0.05$ ).

Protein scores are derived from ions scores as a non-probabilistic basis for ranking protein hits.



Spot No.: **64**

NCBI accession No.: *cassava4.1\_017973m*|PACid:17985926

Plant species: ***Manihot esculenta***

Protein name: **Peroxiredoxin-2B**

PFF Mascot score: [**180**]

Sequence coverage %: [**22**]

Matched peptides No.: [**10**]

p value: 2e-013

Calculated Mr: **17433**

Calculated pI: **5.70**

### Annotated PMF spectra:

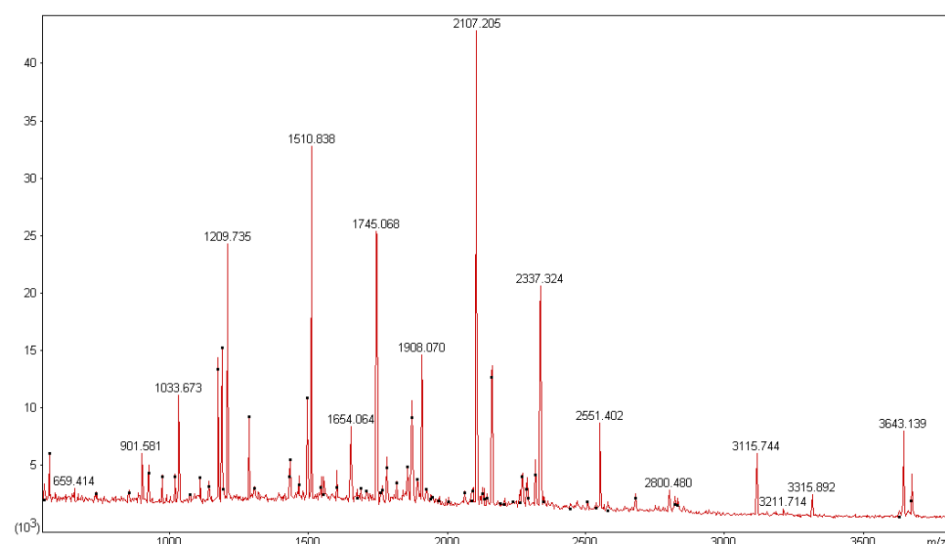

### PFF Searched Score:

Ions score is  $-10 \cdot \log(P)$ , where  $P$  is the probability that the observed match is a random event.

Individual ions scores  $> 32$  indicate identity or extensive homology ( $p < 0.05$ ).

Protein scores are derived from ions scores as a non-probabilistic basis for ranking protein hits.



Spot No.: **65**

NCBI accession No.: *cassava4.1\_017871m*|PACid:17980723

Plant species: ***Manihot esculenta***

Protein name: **18.1 kDa class I heat shock protein**

PFF Mascot score: **[164]**      Sequence coverage %: **[25]**

Matched peptides No.: **[5]**      p value: **0.00017**

Calculated Mr: **18750**      Calculated pI: **7.93**

### Annotated PMF spectra:

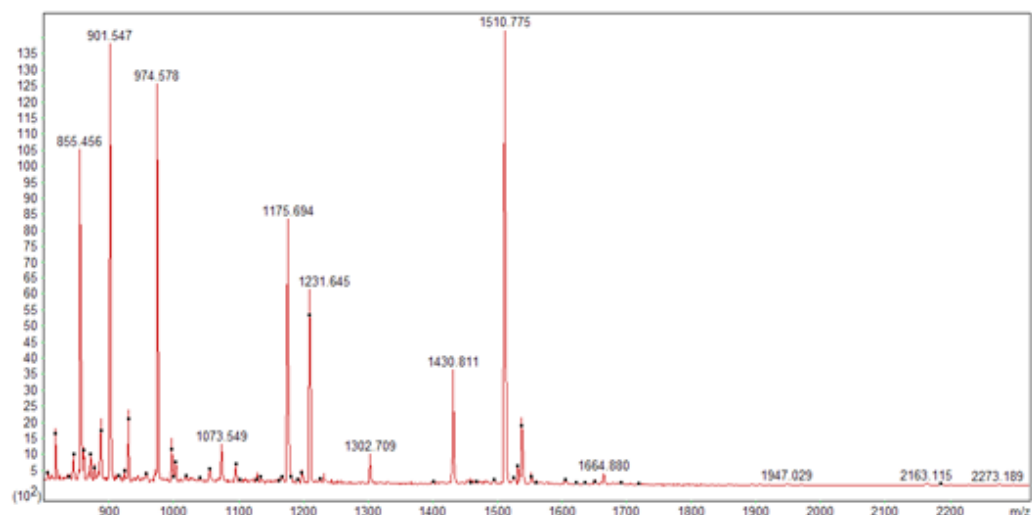

### PFF Searched Score:

Ions score is  $-10 \cdot \log(P)$ , where P is the probability that the observed match is a random event.

Individual ions scores  $> 34$  indicate identity or extensive homology ( $p < 0.05$ ).

Protein scores are derived from ions scores as a non-probabilistic basis for ranking protein hits.

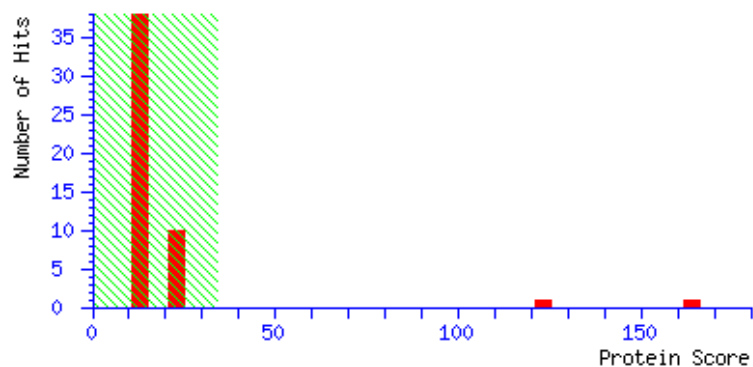

Spot No.: **68**

NCBI accession No.: *cassava4.1\_018338m*|PACid:17992346

Plant species: ***Manihot esculenta***

Protein name: **Ubiquitin-conjugating enzyme E2 variant 1C**

Mascot score: **119**

Sequence coverage %: **72**    p value:  $9.2e-008$

Matched peptides No.: **12**            Total peptides No.: **37**

Calculated Mr: **17236**                      Calculated pI: **5.73**

### Annotated PMF spectra:

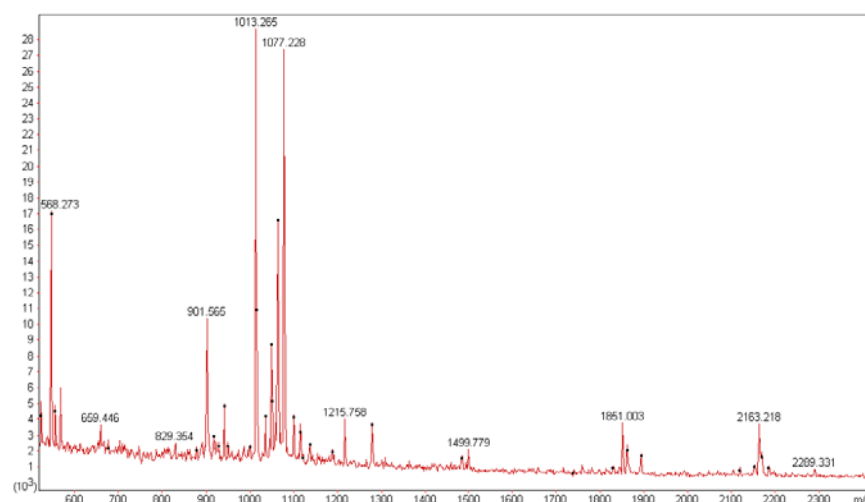

### Probability Based Mowse Score:

Protein score is  $-10 \cdot \log(P)$ , where P is the probability that the observed match is a random event. Protein scores greater than 61 are significant ( $p < 0.05$ ).

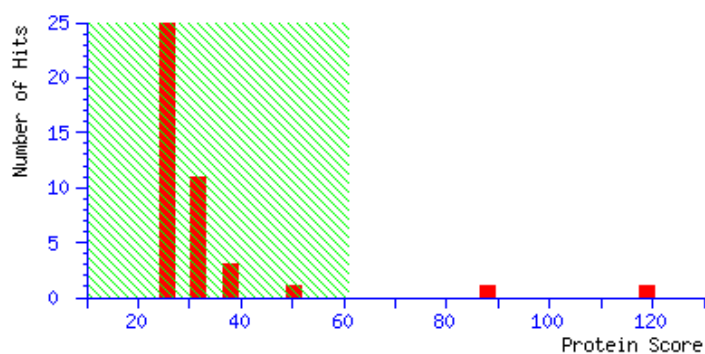

Spot No.: **69**

NCBI accession No.: *cassava4.1\_018010m*|PACid:17970081

Plant species: ***Manihot esculenta***

Protein name: **AT3g53990/F5K20\_290**

**PFF Mascot score: [195]      Sequence coverage %: [21]**

Matched peptides No.: **[3]**      p value: **5.2e-006**

Calculated Mr: **18044**      Calculated pI: **6.14**

### Annotated PMF spectra:

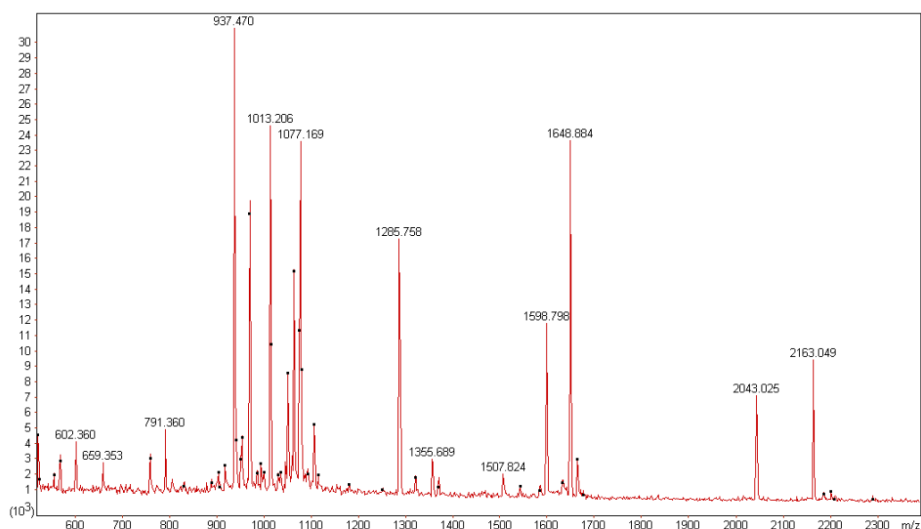

### PFF Searched Score:

Ions score is  $-10 \cdot \log(P)$ , where P is the probability that the observed match is a random event.

Individual ions scores  $> 33$  indicate identity or extensive homology ( $p < 0.05$ ).

Protein scores are derived from ions scores as a non-probabilistic basis for ranking protein hits.



Spot No.: 71

NCBI accession No.: cassava4.1\_013840m|PACid:17968262

Plant species: *Manihot esculenta*

Protein name: **Proteasome subunit alpha type-2-A**

PFF Mascot score: [99]

Sequence coverage %: [8]

Matched peptides No.: [2]

p value: **0.0001**

Calculated Mr: **29845**

Calculated pI: **6.13**

### Annotated PMF spectra:

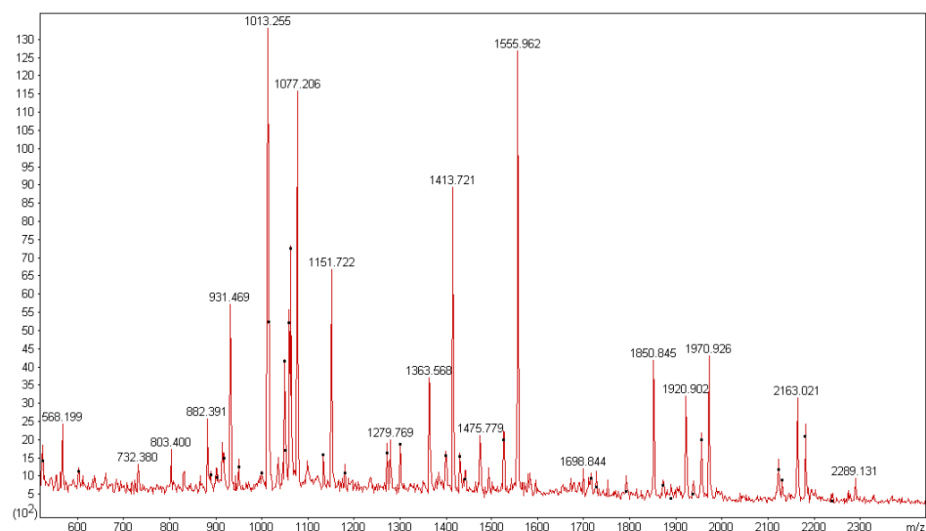

### PFF Searched Score:

Ions score is  $-10 \cdot \log(P)$ , where P is the probability that the observed match is a random event.

Individual ions scores  $> 33$  indicate identity or extensive homology ( $p < 0.05$ ).

Protein scores are derived from ions scores as a non-probabilistic basis for ranking protein hits.



Spot No.: 77

NCBI accession No.: *cassava4.1\_010971m*|PACid:17987784

Plant species: ***Manihot esculenta***

Protein name: **Thiamine thiazole synthase, chloroplastic**

Mascot score: **88**

Sequence coverage %: **38**      p value: 0.00011

Matched peptides No.: **17**      Total peptides No.: **70**

Calculated Mr: **36908**      Calculated pI: **7.10**

### Annotated PMF spectra:

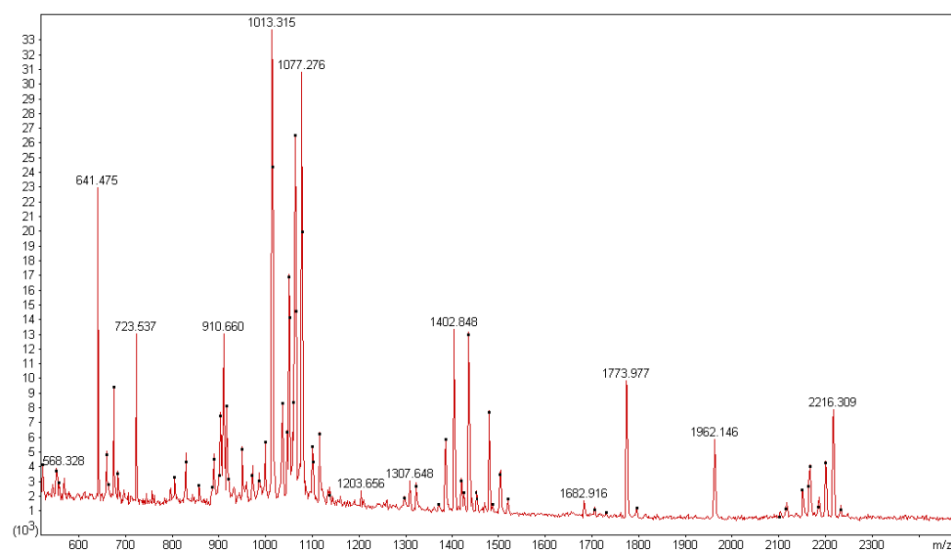

### Probability Based Mowse Score:

Protein score is  $-10 \cdot \log(P)$ , where P is the probability that the observed match is a random event. Protein scores greater than 61 are significant ( $p < 0.05$ ).

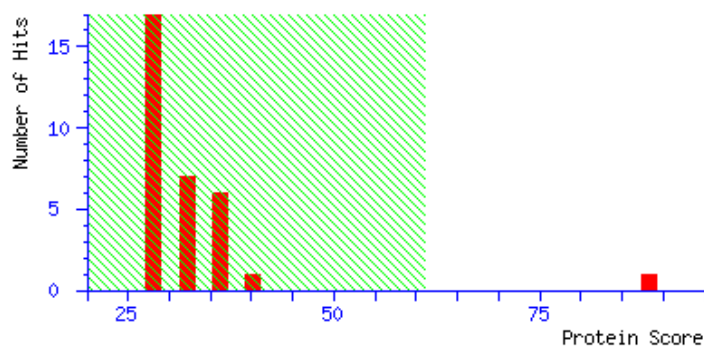



Spot No.: **78**

NCBI accession No.: *cassava4.1\_009245m*[PACid:17963775]

Plant species: ***Manihot esculenta***

Protein name: **S-adenosylmethionine synthase 1**

Mascot score: **119**

Sequence coverage %: **55**      p value:  $9.2e-008$

Matched peptides No.: **16**      Total peptides No.: **54**

Calculated Mr: **43709**      Calculated pI: **5.68**

### Annotated PMF spectra:

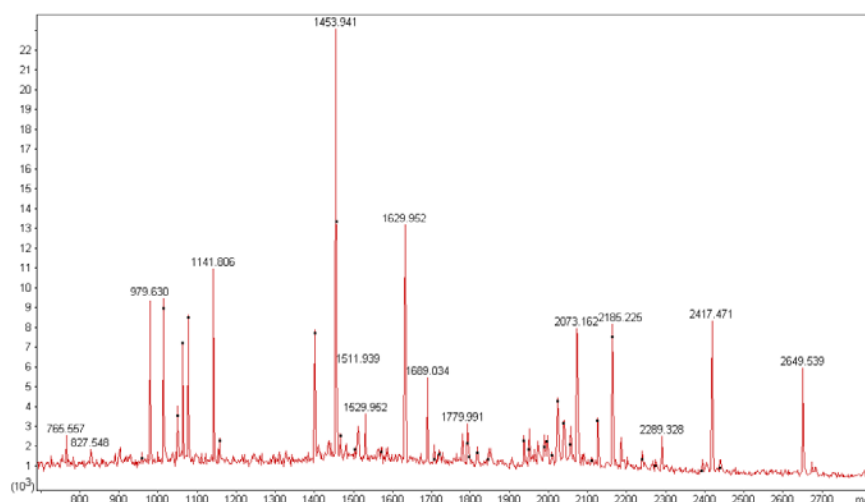

### Probability Based Mowse Score:

Protein score is  $-10 \cdot \log(P)$ , where P is the probability that the observed match is a random event. Protein scores greater than 61 are significant ( $p < 0.05$ ).

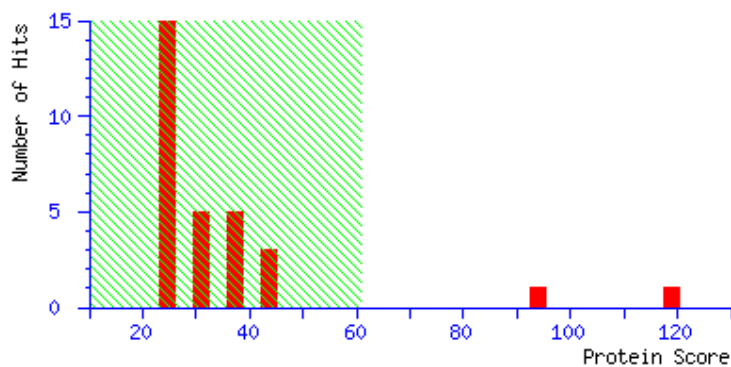

Spot No.: **79**

NCBI accession No.: **cassava4.1\_011550m|PACid:17993466**

Plant species: ***Manihot esculenta***

Protein name: **predicted protein** Mascot score: **108**

Sequence coverage %: **50** p value: **1.2e-006**

Matched peptides No.: **17** Total peptides No.: **67**

Calculated Mr: **36178** Calculated pI: **6.09**

### Annotated PMF spectra:

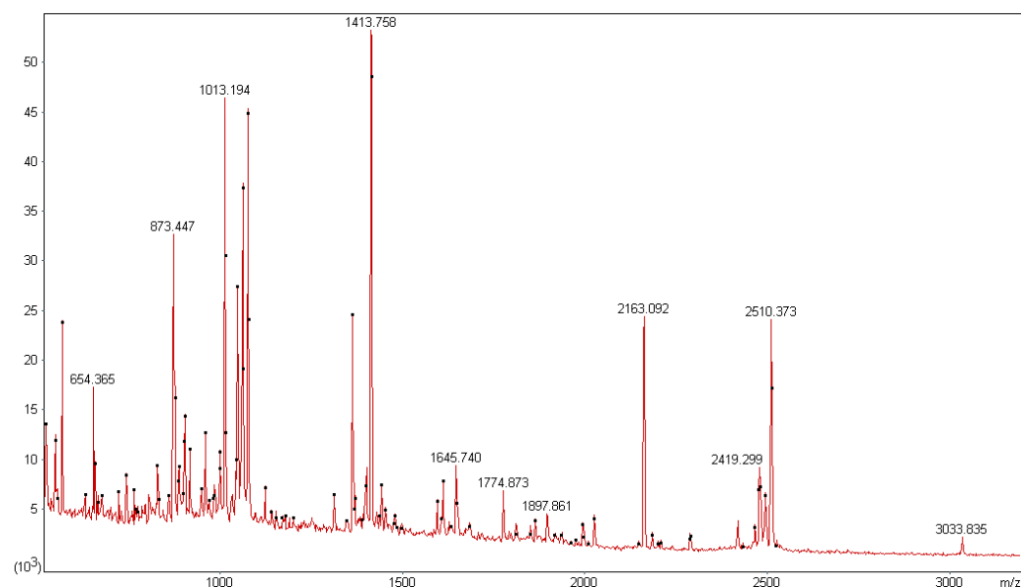

### Probability Based Mowse Score:

Protein score is  $-10 \cdot \log(P)$ , where P is the probability that the observed match is a random event. Protein scores greater than 61 are significant ( $p < 0.05$ ).

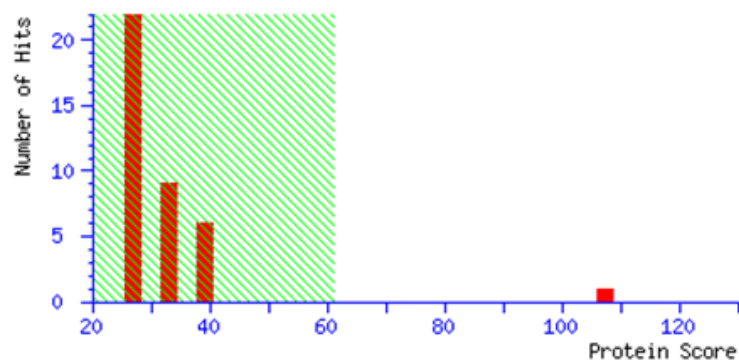

Spot No.: **86**

NCBI accession No.: **cassava4.1\_004164m|PACid:17985770**

Plant species: ***Manihot esculenta***

Protein name: **malic enzyme, putative** Mascot score: **177**

Sequence coverage %: **47** p value: **1.5e-013**

Matched peptides No.: **33** Total peptides No.: **90**

Calculated Mr: **65246** Calculated pI: **6.03**

### Annotated PMF spectra:

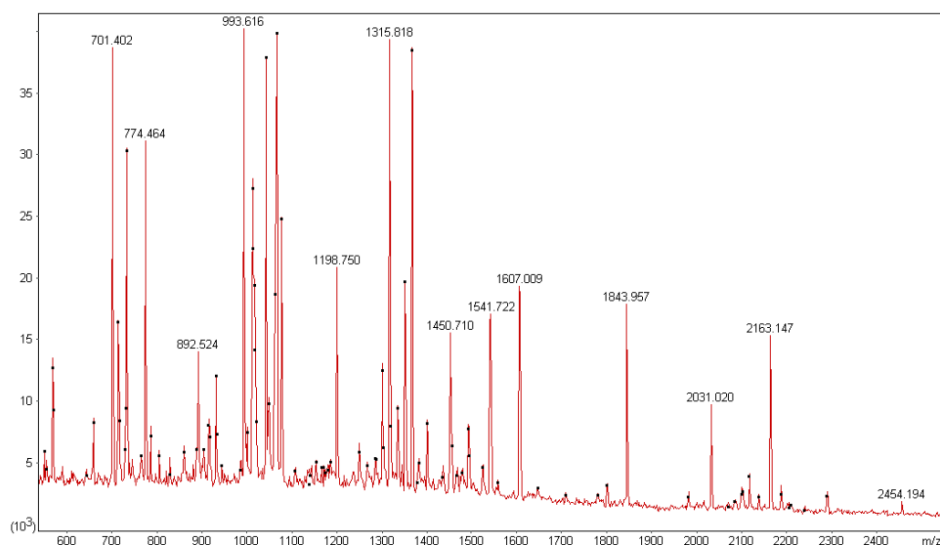

### Probability Based Mowse Score:

Protein score is  $-10 \cdot \log(P)$ , where P is the probability that the observed match is a random event. Protein scores greater than 61 are significant ( $p < 0.05$ ).

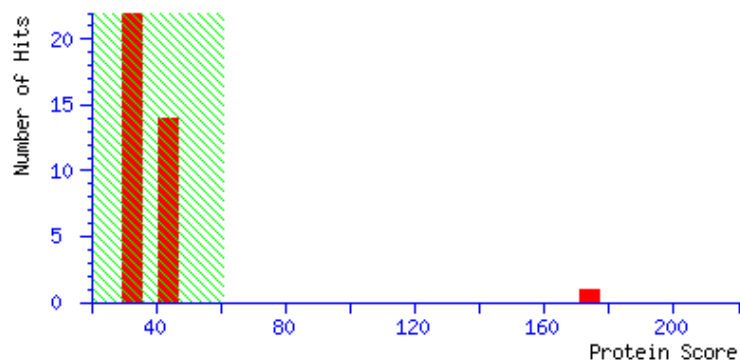

Spot No.: **88**

NCBI accession No.: *cassava4.1\_007678m*|PACid:17961094

Plant species: ***Manihot esculenta*** Mascot score: **160**

Protein name: **Bifunctional enolase 2/transcriptional activator**

Sequence coverage %: **62** p value:  $7.3e-012$

Matched peptides No.: **25** Total peptides No.: **78**

Calculated Mr: **47854** Calculated pI: **5.86**

### Annotated PMF spectra:

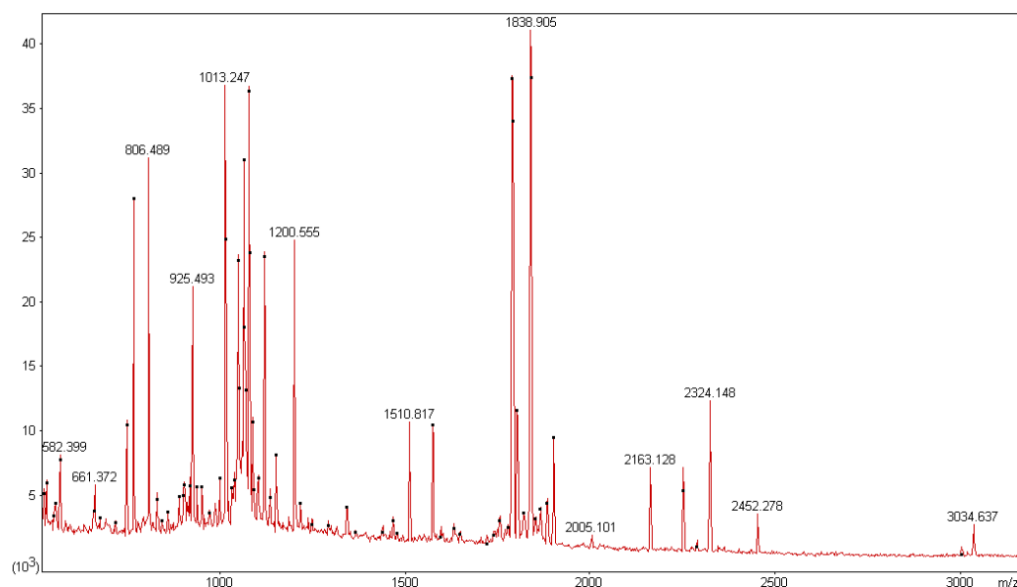

### Probability Based Mowse Score:

Protein score is  $-10 \cdot \log(P)$ , where P is the probability that the observed match is a random event. Protein scores greater than 61 are significant ( $p < 0.05$ ).

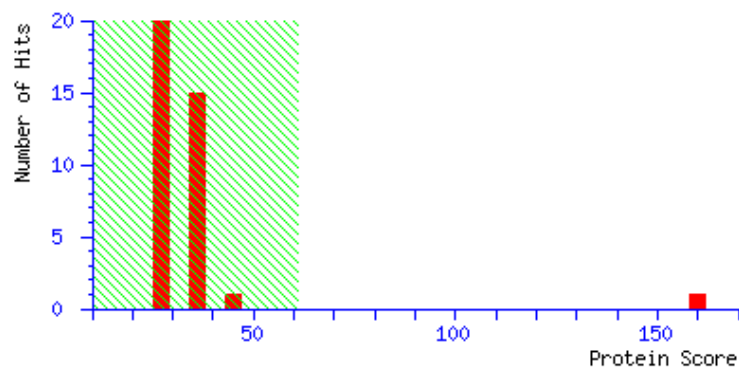

Spot No.: **89**

NCBI accession No.: *cassava4.1\_003677m*|PACid:17968299

Plant species: ***Manihot esculenta*** Mascot score: **234**

Protein name: **V-type proton ATPase catalytic subunit A**

Sequence coverage %: **61** p value:  $2.9e-019$

Matched peptides No.: **41**

Total peptides No.: **95**

Calculated Mr: **68989**

Calculated pI: **5.29**

### Annotated PMF spectra:

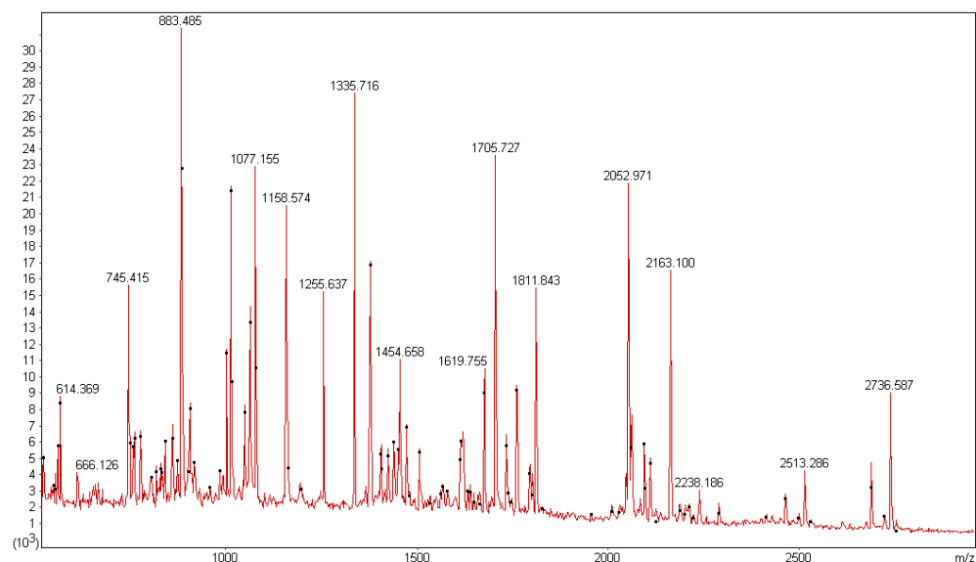

### Probability Based Mowse Score:

Protein score is  $-10 \cdot \log(P)$ , where P is the probability that the observed match is a random event. Protein scores greater than 61 are significant ( $p < 0.05$ ).

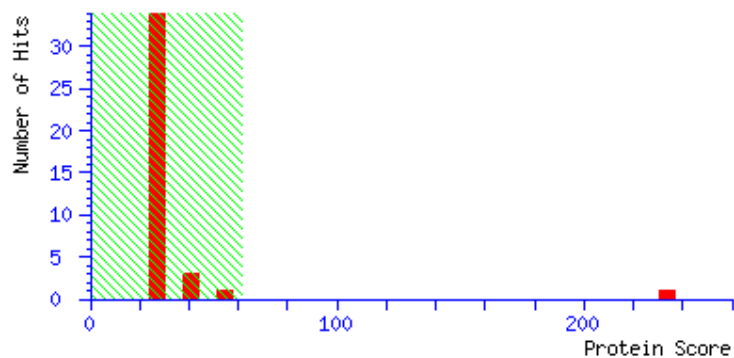

Spot No.: **92**

NCBI accession No.: *cassava4.1\_004164m*|PACid:17985770

Plant species: ***Manihot esculenta***

Protein name: **malic enzyme, putative** Mascot score: **154**

Sequence coverage %: **35** p value: **2.9e-11**

Matched peptides No.: **26** Total peptides No.: **66**

Calculated Mr: **65246** Calculated pI: **6.03**

### Annotated PMF spectra:

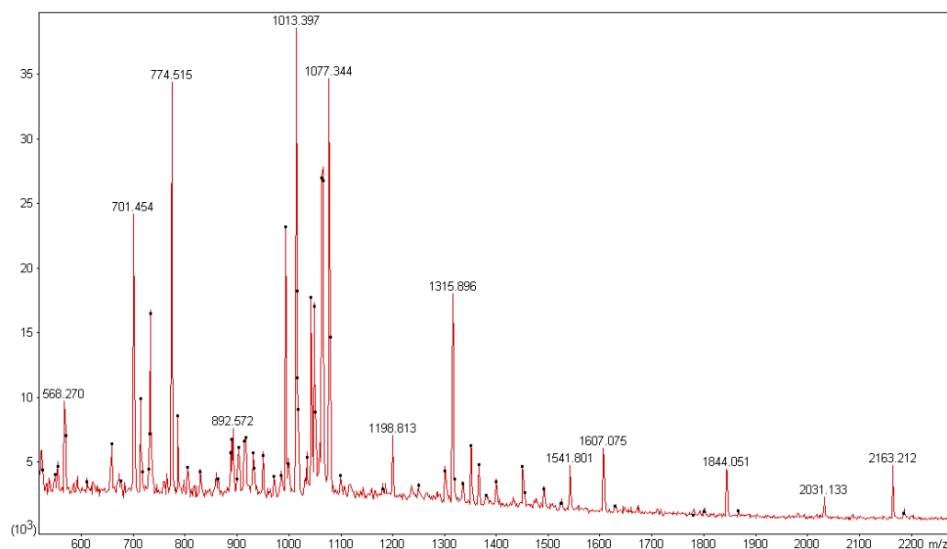

### Probability Based Mowse Score:

Protein score is  $-10 \cdot \log(P)$ , where P is the probability that the observed match is a random event. Protein scores greater than 61 are significant ( $p < 0.05$ ).

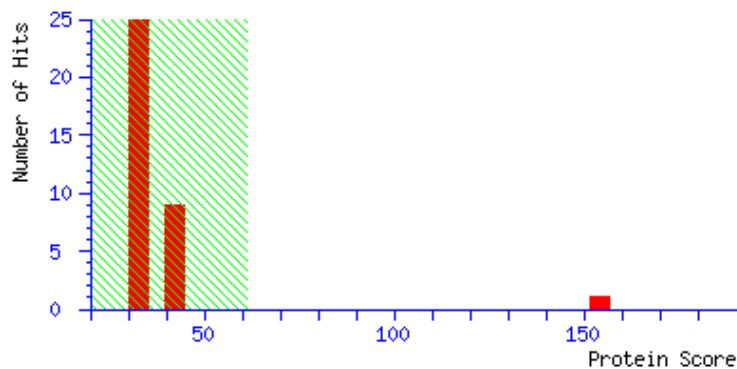

Spot No.: **94**

NCBI accession No.: *cassava4.1\_002466m*|PACid:17978799

Plant species: ***Manihot esculenta***

Protein name: **Alpha-glucan phosphorylase 1**

PFF Mascot score: **[278]**      Sequence coverage %: **[12]**

Matched peptides No.: **[7]**      p value: **1.1e-007**

Calculated Mr: 81918      Calculated pI: **8.50**

### Annotated PMF spectra:



### PFF Searched Score:

Ions score is  $-10 \cdot \log(P)$ , where P is the probability that the observed match is a random event.

Individual ions scores  $> 34$  indicate identity or extensive homology ( $p < 0.05$ ).

Protein scores are derived from ions scores as a non-probabilistic basis for ranking protein hits.



Spot No.: **97**

NCBI accession No.: *cassava4.1\_011729m|PACid:17989246*

Plant species: ***Manihot esculenta***

Protein name: **nitrile-specifier protein 5-like**

PFF Mascot score: **[165]**      Sequence coverage %: **[24]**

Matched peptides No.: **[7]**      p value: **0.00081**

Calculated Mr: 35840      Calculated *pI*: **5.49**

### Annotated PMF spectra:

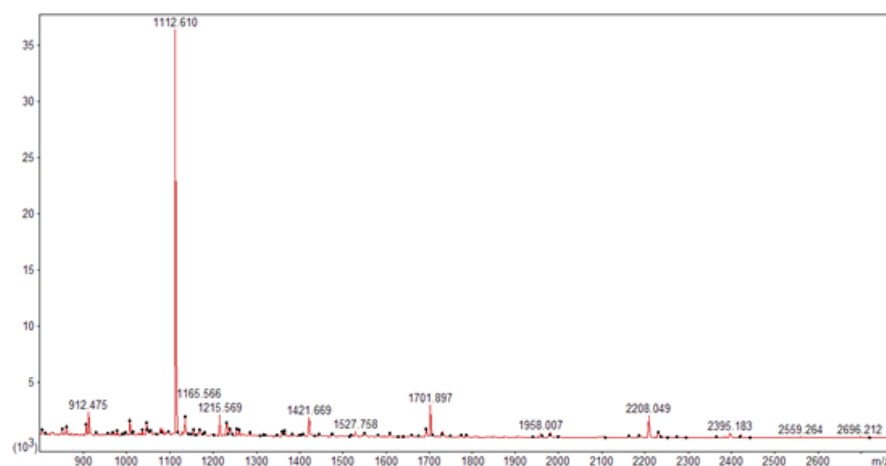

### PFF Searched Score:

Ions score is  $-10 \cdot \log(P)$ , where *P* is the probability that the observed match is a random event.

Individual ions scores  $> 33$  indicate identity or extensive homology ( $p < 0.05$ ).

Protein scores are derived from ions scores as a non-probabilistic basis for ranking protein hits.

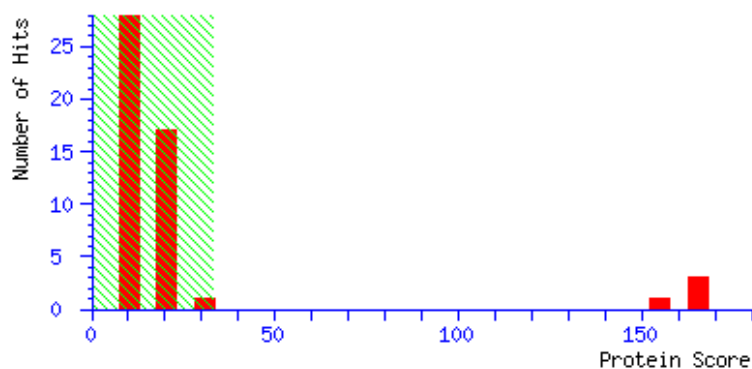



Spot No.: **105**

NCBI accession No.: *cassava4.1\_017871m*|PACid:17980723

Plant species: ***Manihot esculenta***

Protein name: **18.1 kDa class I heat shock protein**

PFF Mascot score: **[142]**      Sequence coverage %: **[23]**

Matched peptides No.: **[5]**      p value: **0.00014**

Calculated Mr: 18750      Calculated pI: **7.93**

### Annotated PMF spectra:

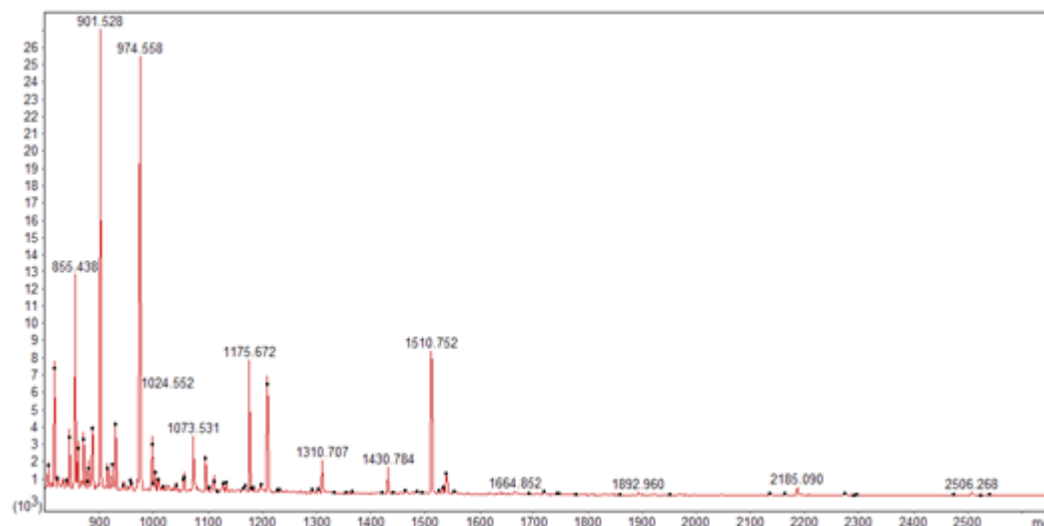

### PFF Searched Score:

Ions score is  $-10 \cdot \log(P)$ , where P is the probability that the observed match is a random event.

Individual ions scores  $> 34$  indicate identity or extensive homology ( $p < 0.05$ ).

Protein scores are derived from ions scores as a non-probabilistic basis for ranking protein hits.

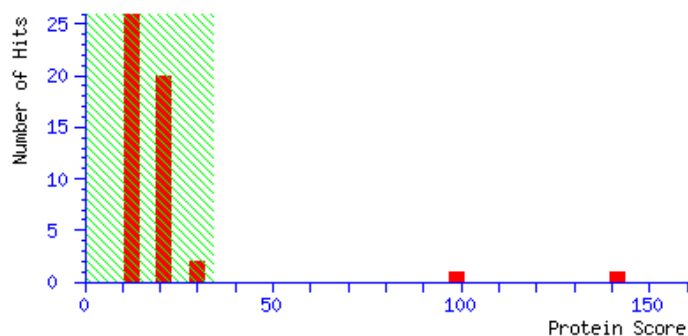

Spot No.: **113**

NCBI accession No.: *cassava4.1\_009779m*[PACid:17990964

Plant species: ***Manihot esculenta***

Protein name: **Actin-7**

PFF Mascot score: **[440]**

Sequence coverage %: **[36]**

Matched peptides No.: **[9]**

p value: **2.9e-012**

Calculated Mr: 41897

Calculated pI: **5.31**

### Annotated PMF spectra:

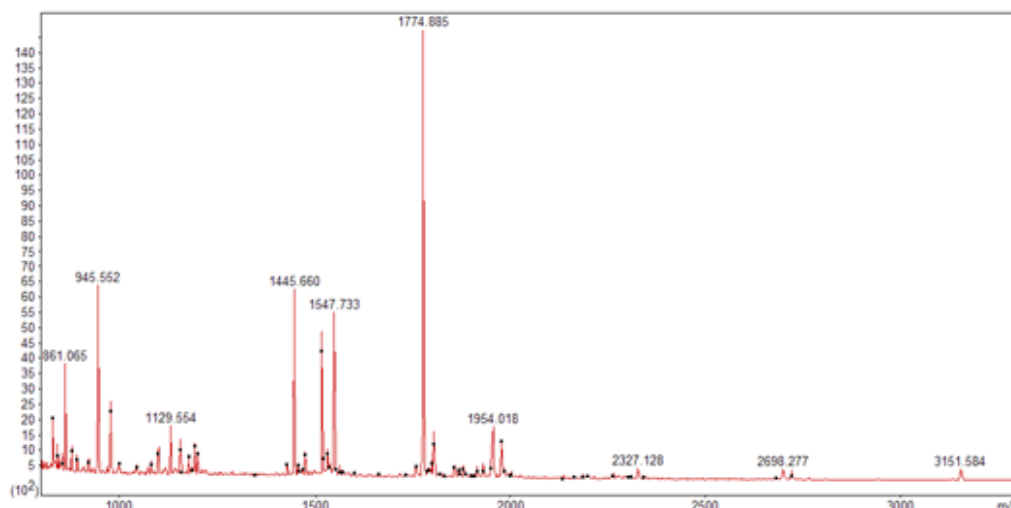

### PFF Searched Score:

Ions score is  $-10 \cdot \log(P)$ , where P is the probability that the observed match is a random event.

Individual ions scores  $> 33$  indicate identity or extensive homology ( $p < 0.05$ ).

Protein scores are derived from ions scores as a non-probabilistic basis for ranking protein hits.

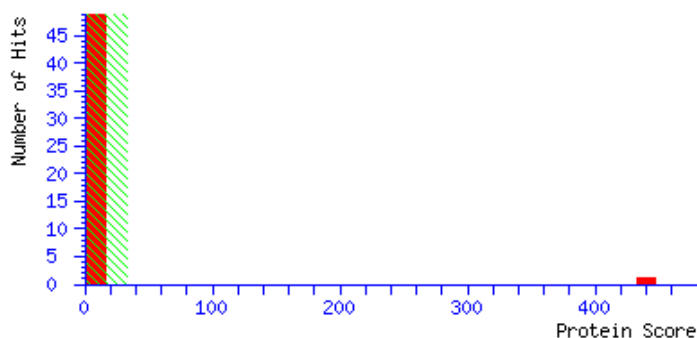

Spot No.: **118**

NCBI accession No.: **cassava4.1\_005314m|PACid:17981128**

Plant species: ***Manihot esculenta***

Protein name: **Ketol-acid reductoisomerase, chloroplastic**

PFF Mascot score: **[214]**      Sequence coverage %: **[9]**

Matched peptides No.: **[4]**      p value: **9.6e-005**

Calculated Mr: **58515**      Calculated pI: **5.50**

### Annotated PMF spectra:

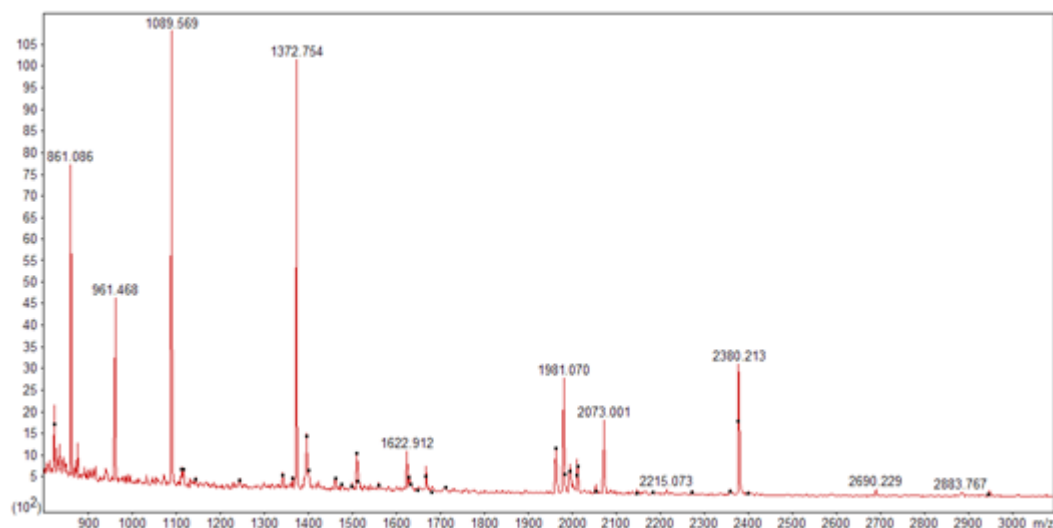

### PFF Searched Score:

Ions score is  $-10 \cdot \log(P)$ , where P is the probability that the observed match is a random event.

Individual ions scores  $> 33$  indicate identity or extensive homology ( $p < 0.05$ ).

Protein scores are derived from ions scores as a non-probabilistic basis for ranking protein hits.

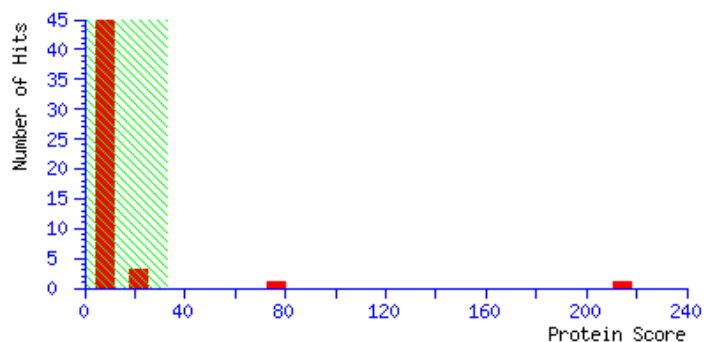

Spot No.: **130**

NCBI accession No.: **cassava4.1\_001644m|PACid:17971276**

Plant species: ***Manihot esculenta***

Protein name: **At1g56070/T6H22\_13**

PFF Mascot score: **[184]**      Sequence coverage %: **[10]**

Matched peptides No.: **[7]**      p value: **2.5e-005**

Calculated Mr: **95045**      Calculated pI: **5.86**

### Annotated PMF spectra:

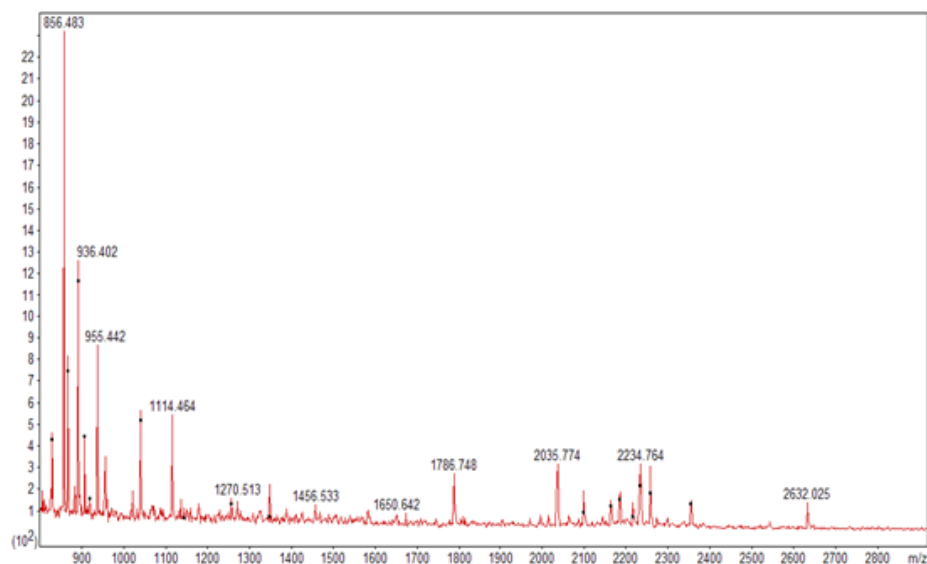

### PFF Searched Score:

Ions score is  $-10 \cdot \log(P)$ , where P is the probability that the observed match is a random event.

Individual ions scores  $> 33$  indicate identity or extensive homology ( $p < 0.05$ ).

Protein scores are derived from ions scores as a non-probabilistic basis for ranking protein hits.

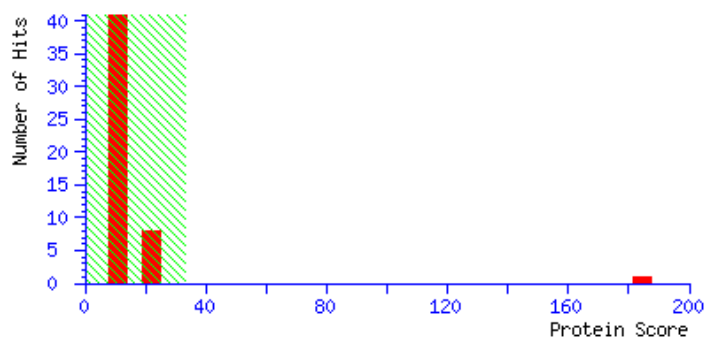

Spot No.: **131**

NCBI accession No.: **cassava4.1\_002747m|PACid:17960141**

Plant species: ***Manihot esculenta***

Protein name: **Heat shock protein 90-3**

PFF Mascot score: **[181]**      Sequence coverage %: **[7]**

Matched peptides No.: **[4]**      p value: **0.00052**

Calculated Mr: **80250**      Calculated pI: **4.99**

### Annotated PMF spectra:

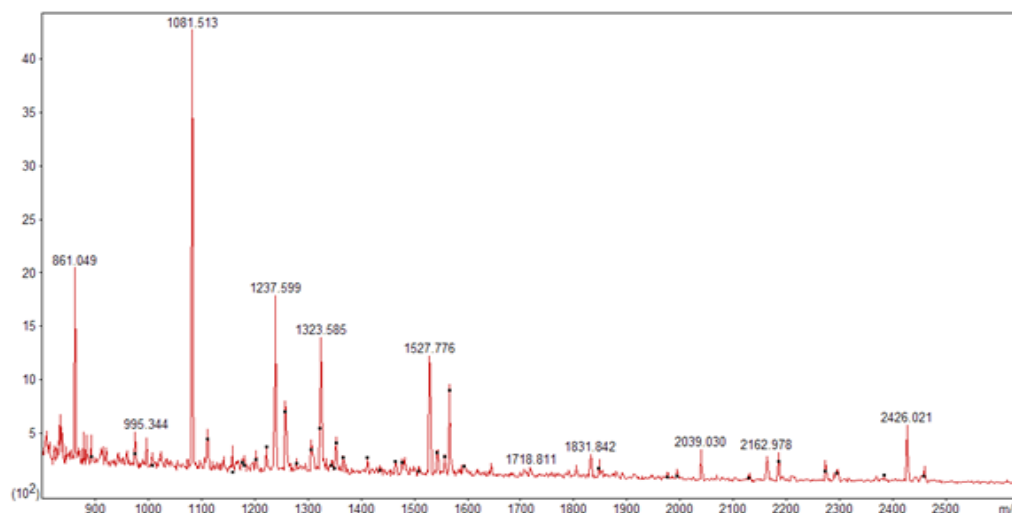

### PFF Searched Score:

Ions score is  $-10 \cdot \log(P)$ , where P is the probability that the observed match is a random event.

Individual ions scores  $> 33$  indicate identity or extensive homology ( $p < 0.05$ ).

Protein scores are derived from ions scores as a non-probabilistic basis for ranking protein hits.

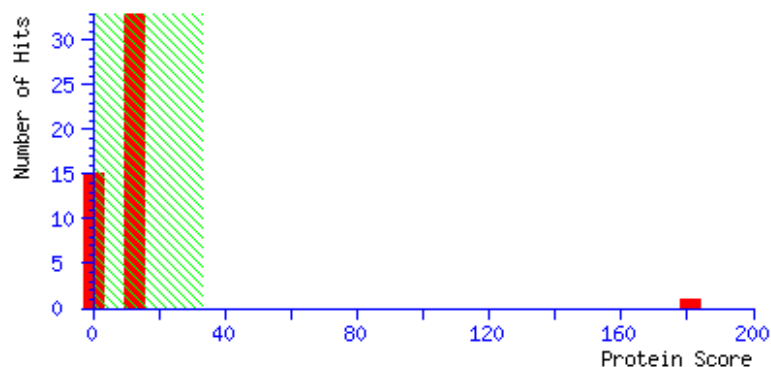

Spot No.: **132**

NCBI accession No.: *cassava4.1\_002716m*|PACid:17962449

Plant species: ***Manihot esculenta***

Protein name: **Heat shock 70 kDa protein 7, chloroplastic**

PFF Mascot score: **[516]**      Sequence coverage %: **[16]**

Matched peptides No.: **[9]**      p value: **1.7e-012**

Calculated Mr: **75341**      Calculated pI: **5.20**

### Annotated PMF spectra:

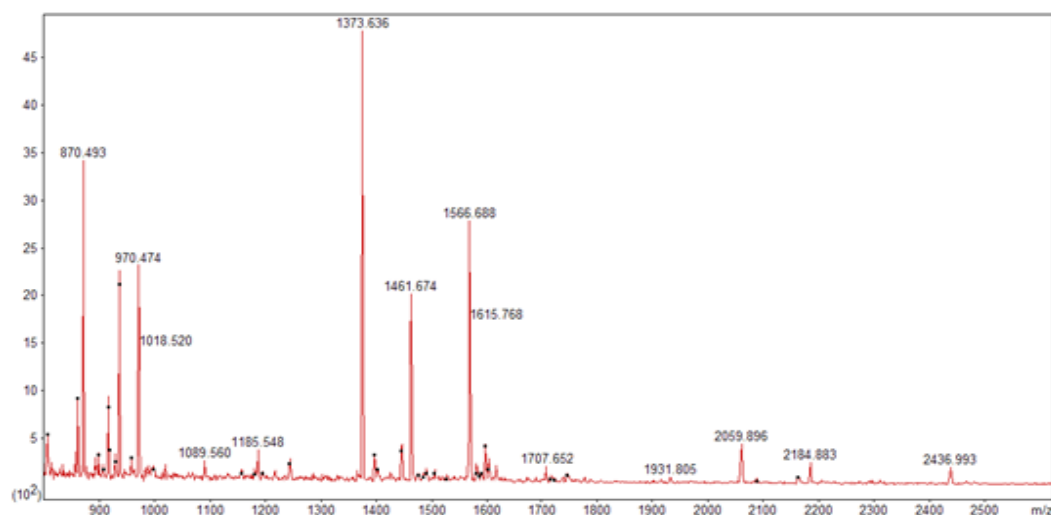

### PFF Searched Score:

Ions score is  $-10 \cdot \log(P)$ , where P is the probability that the observed match is a random event.

Individual ions scores  $> 34$  indicate identity or extensive homology ( $p < 0.05$ ).

Protein scores are derived from ions scores as a non-probabilistic basis for ranking protein hits.

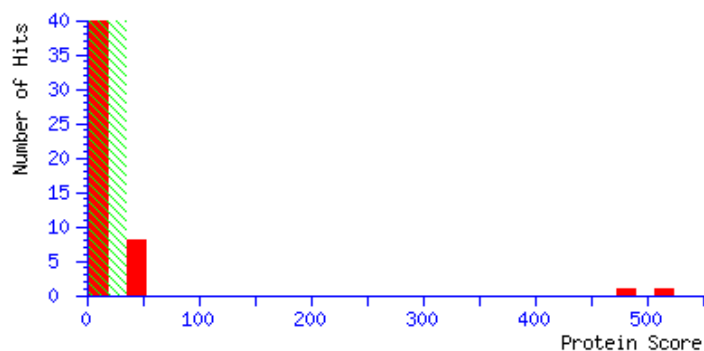

Spot No.: **133**

NCBI accession No.: *cassava4.1\_002706m*|PACid:17974818

Plant species: ***Manihot esculenta***

Protein name: **Heat shock 70 kDa protein 7, chloroplastic**

PFF Mascot score: **[386]**      Sequence coverage %: **[12]**

Matched peptides No.: **[7]**      p value: **6.6e-011**

Calculated Mr: **75452**      Calculated pI: **5.24**

### Annotated PMF spectra:

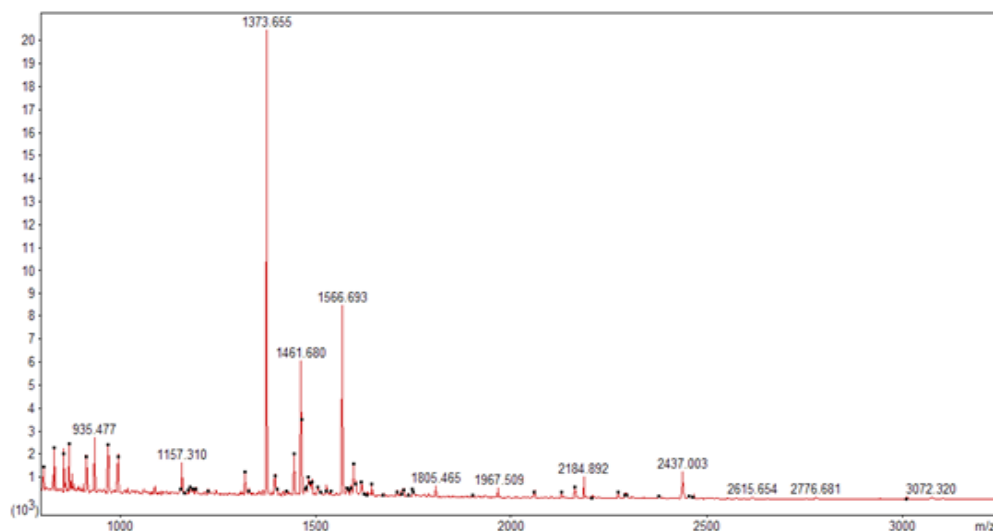

### PFF Searched Score:

Ions score is  $-10 \cdot \log(P)$ , where P is the probability that the observed match is a random event.

Individual ions scores  $> 34$  indicate identity or extensive homology ( $p < 0.05$ ).

Protein scores are derived from ions scores as a non-probabilistic basis for ranking protein hits.

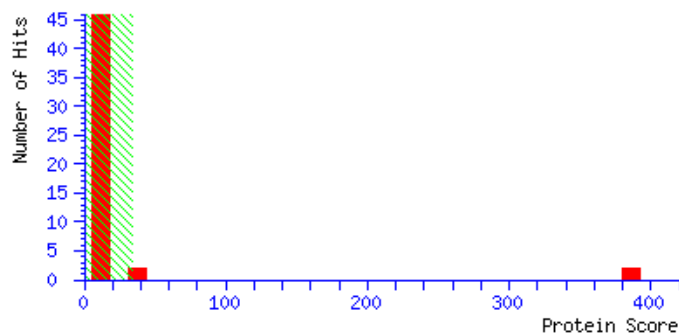

Spot No.: **134**

NCBI accession No.: *cassava4.1\_005468m*|PACid:17987918

Plant species: ***Manihot esculenta***

Protein name: **Putative S9 Tyrosyl aminopeptidase**

PFF Mascot score: **[305]**      Sequence coverage %: **[14]**

Matched peptides No.: **[6]**      p value: **1.6e-007**

Calculated Mr: **59341**      Calculated pI: **4.99**

### Annotated PMF spectra:

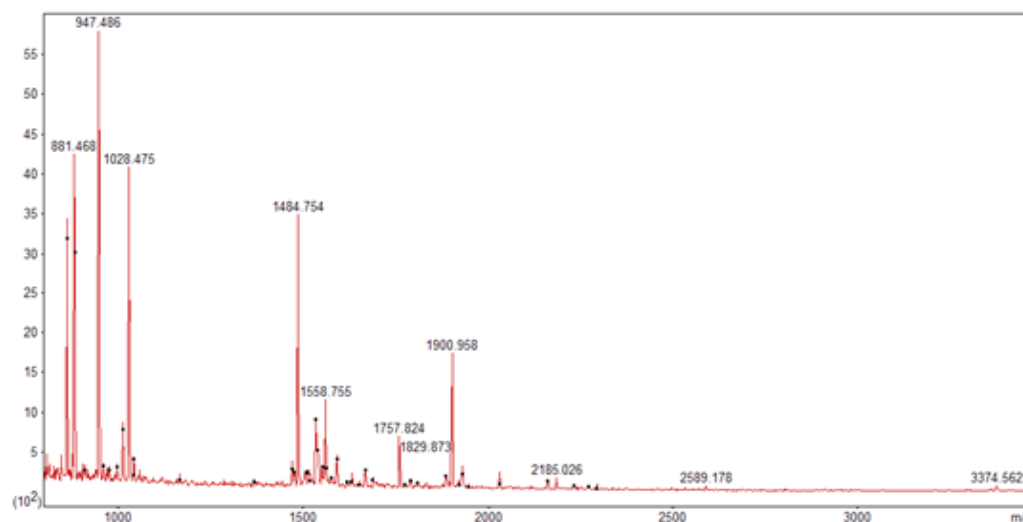

### PFF Searched Score:

Ions score is  $-10 \cdot \log(P)$ , where P is the probability that the observed match is a random event.

Individual ions scores  $> 34$  indicate identity or extensive homology ( $p < 0.05$ ).

Protein scores are derived from ions scores as a non-probabilistic basis for ranking protein hits.

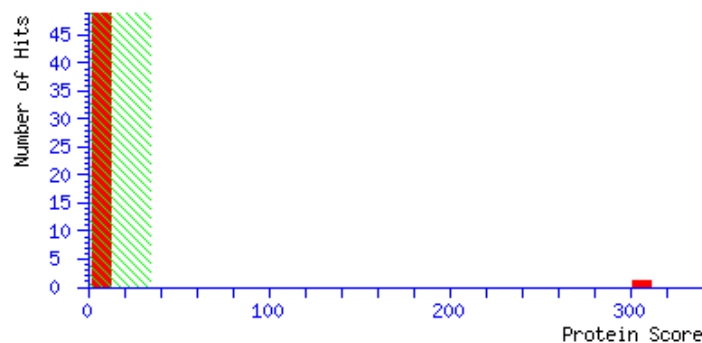



Spot No.: **135**

NCBI accession No.: *cassava4.1\_002307m*|PACid:17988755

Plant species: ***Manihot esculenta***

Protein name: **Transketolase-2, chloroplastic**

PFF score: **78**      Sequence coverage %: **[7]**

Matched peptides No.: **[2]**      p value: **0.0001**

Calculated Mr: **80925**      Calculated pI: **6.31**

### Annotated PMF spectra:

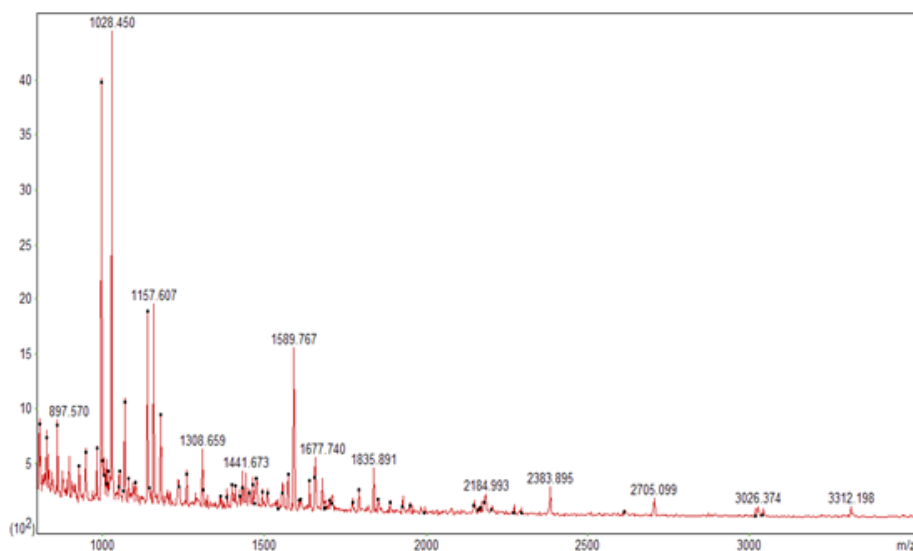

### PFF Searched Score:

Ions score is  $-10 \cdot \log(P)$ , where P is the probability that the observed match is a random event.

Individual ions scores  $> 32$  indicate identity or extensive homology ( $p < 0.05$ ).

Protein scores are derived from ions scores as a non-probabilistic basis for ranking protein hits.

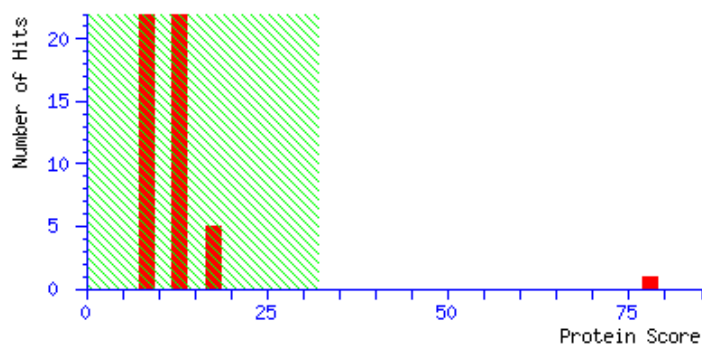

Spot No.: **136**

NCBI accession No.: *cassava4.1\_006409m*|PACid:17968834

Plant species: ***Manihot esculenta***

Protein name: **V-type proton ATPase subunit B3**

PFF Mascot score: **[78]**      Sequence coverage %: **[8]**

Matched peptides No.: **[2]**      p value: **0.0009**

Calculated Mr: **54514**      Calculated pI: **4.91**

### Annotated PMF spectra:

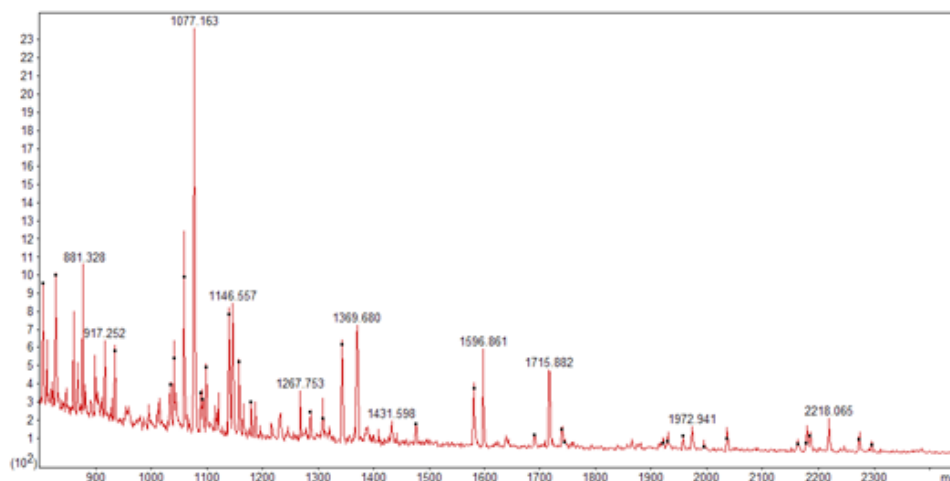

### PFF Searched Score:

Ions score is  $-10 \cdot \log(P)$ , where P is the probability that the observed match is a random event.

Individual ions scores  $> 32$  indicate identity or extensive homology ( $p < 0.05$ ).

Protein scores are derived from ions scores as a non-probabilistic basis for ranking protein hits.

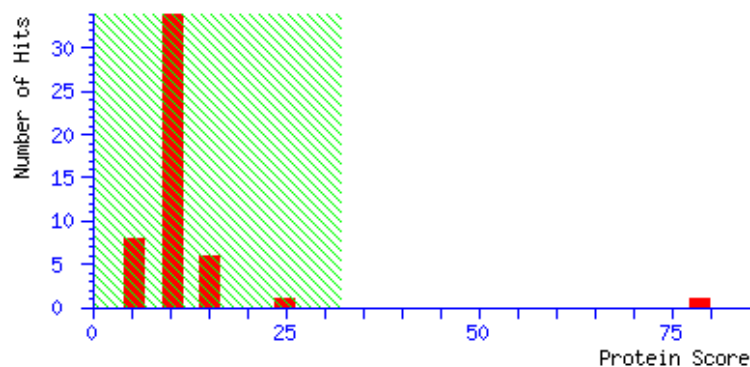

Spot No.: **137**

NCBI accession No.: *cassava4.1\_007650m|PACid:17967223*

Plant species: ***Manihot esculenta***

Protein name: **Tubulin beta-6 chain**

PFF Mascot score: **[193]**      Sequence coverage %: **[11]**

Matched peptides No.: **[5]**      p value: **0.00015**

Calculated Mr: **50741**      Calculated pI: **4.77**

### Annotated PMF spectra:

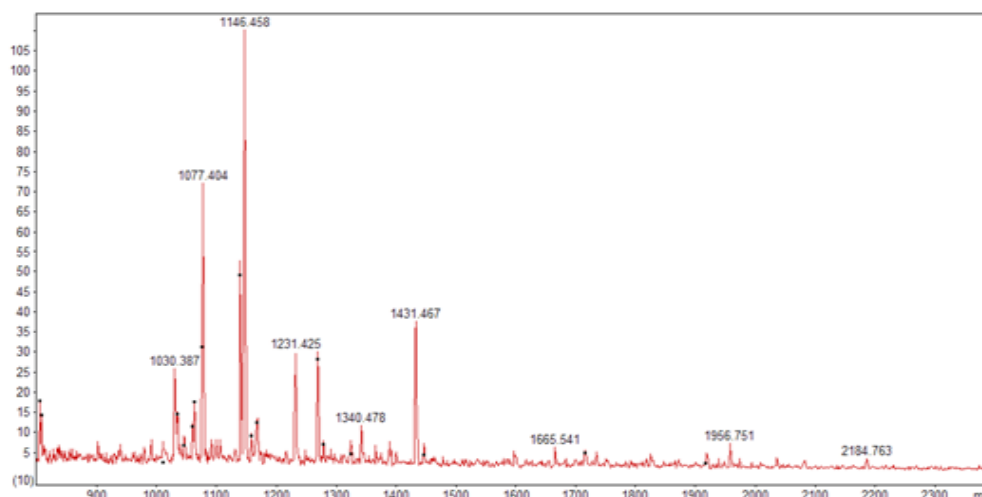

### PFF Searched Score:

Ions score is  $-10 \cdot \log(P)$ , where P is the probability that the observed match is a random event.

Individual ions scores  $> 34$  indicate identity or extensive homology ( $p < 0.05$ ).

Protein scores are derived from ions scores as a non-probabilistic basis for ranking protein hits.

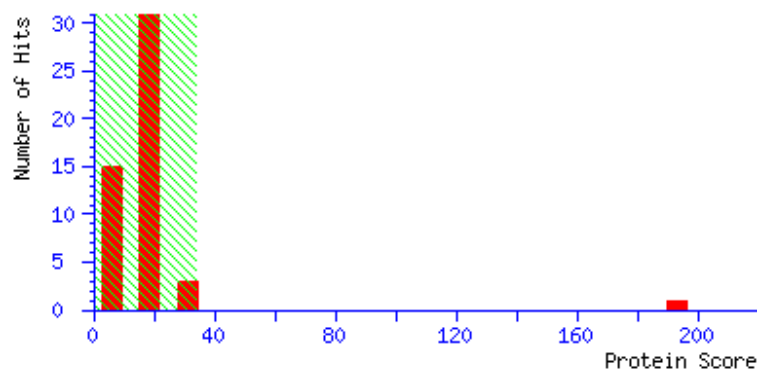

Spot No.: **138**

NCBI accession No.: *cassava4.1\_005250m*|PACid:17973850

Plant species: ***Manihot esculenta***

Protein name: **Importin subunit alpha-1**

PFF Mascot score: **[195]**      Sequence coverage %: **[13]**

Matched peptides No.: **[4]**      p value: **1.6e-009**

Calculated Mr: **59677**      Calculated pI: **5.30**

### Annotated PMF spectra:

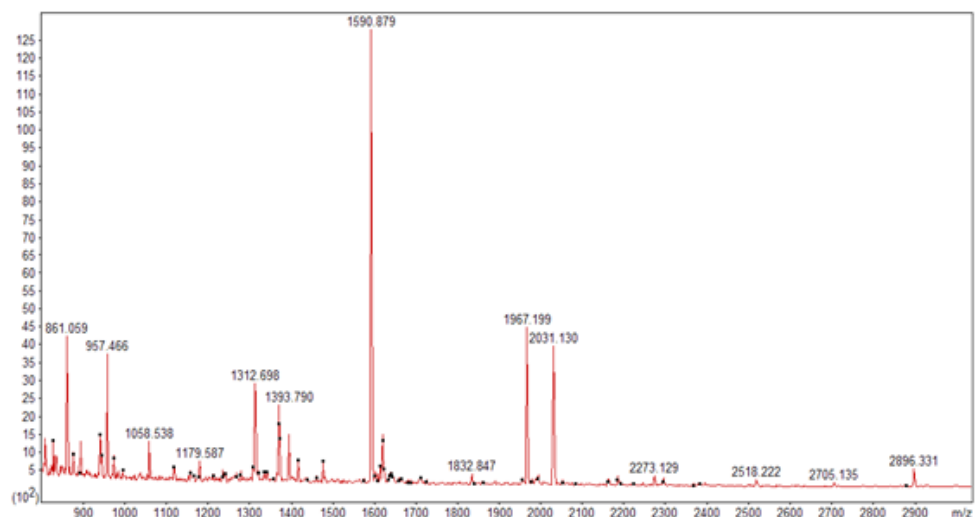

### PFF Searched Score:

Ions score is  $-10 \cdot \log(P)$ , where P is the probability that the observed match is a random event.

Individual ions scores  $> 34$  indicate identity or extensive homology ( $p < 0.05$ ).

Protein scores are derived from ions scores as a non-probabilistic basis for ranking protein hits.

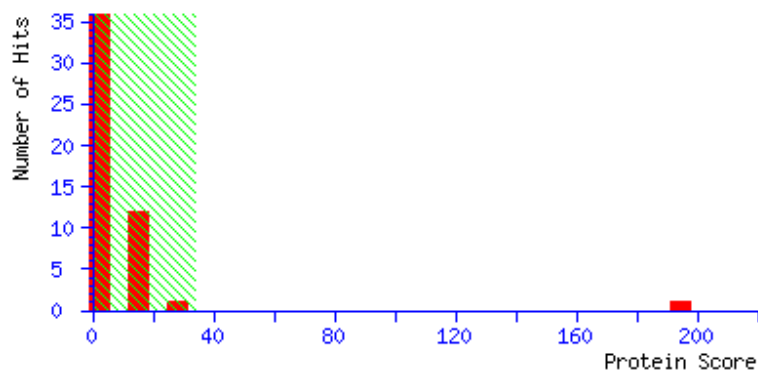

Spot No.: **139**

NCBI accession No.: *cassava4.1\_007640m*|PACid:17979054

Plant species: ***Manihot esculenta***

Protein name: **Tubulin beta-6 chain**

PFF Mascot score: **[170]**      Sequence coverage %: **[10]**

Matched peptides No.: **[4]**      p value: **1.1e-008**

Calculated Mr: **50722**      Calculated pI: **4.68**

### Annotated PMF spectra:

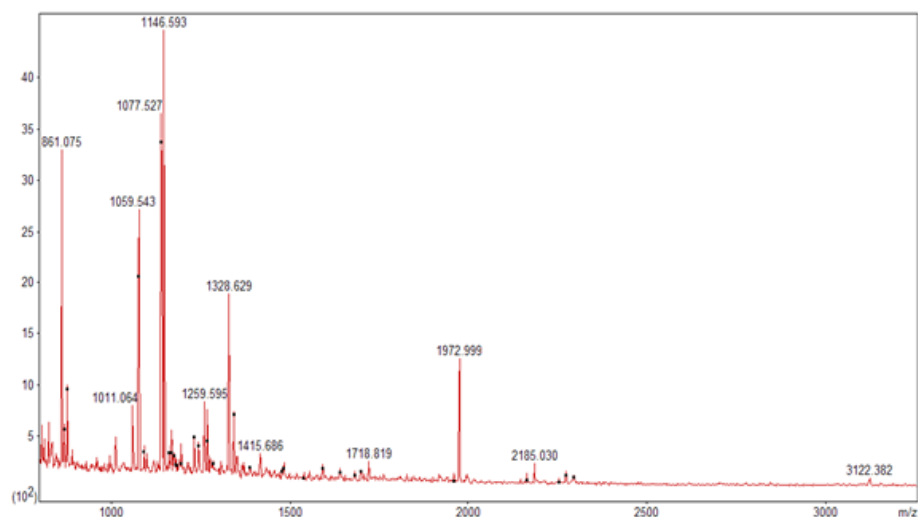

### PFF Searched Score:

Ions score is  $-10 \cdot \log(P)$ , where P is the probability that the observed match is a random event.

Individual ions scores  $> 33$  indicate identity or extensive homology ( $p < 0.05$ ).

Protein scores are derived from ions scores as a non-probabilistic basis for ranking protein hits.

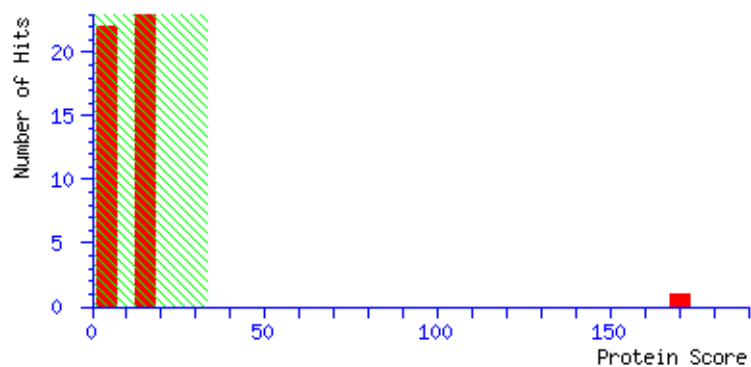

Spot No.: **140**

NCBI accession No.: **cassava4.1\_006508m|PACid:17967572**

Plant species: **Manihot esculenta**

Protein name: **Adenosylhomocysteinase 1**

PFF Mascot score: **[65]**      Sequence coverage %: **[10]**

Matched peptides No.: **[4]**      p value: **0.0011**

Calculated Mr: **53894**      Calculated pI: **5.86**

### **Annotated PMF spectra:**

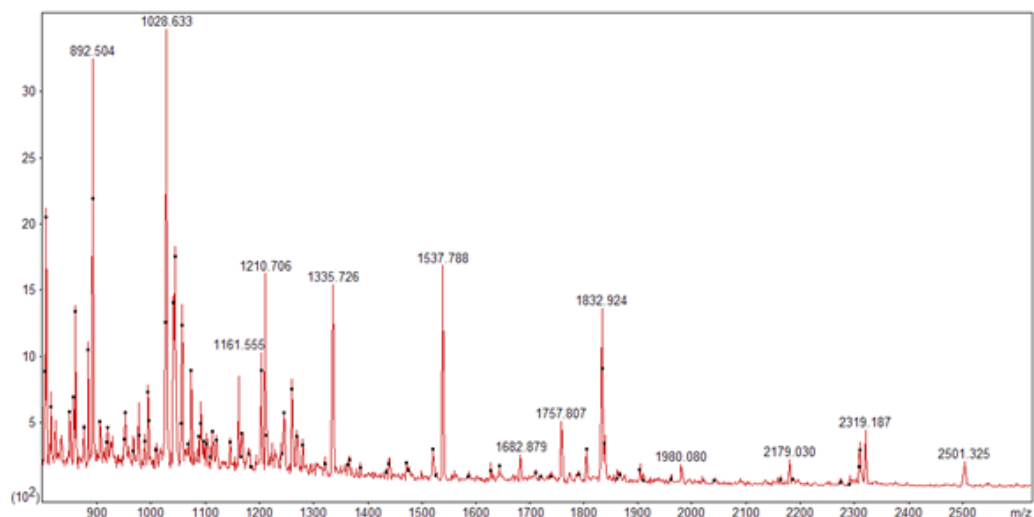

### **PFF Searched Score:**

Ions score is  $-10 \cdot \log(P)$ , where P is the probability that the observed match is a random event.

Individual ions scores  $> 34$  indicate identity or extensive homology ( $p < 0.05$ ).

Protein scores are derived from ions scores as a non-probabilistic basis for ranking protein hits.

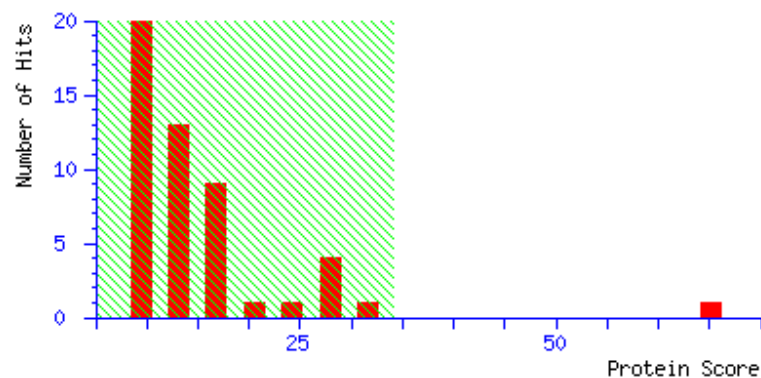

Spot No.: **141**

NCBI accession No.: cassava4.1\_020254m|PACid:17972349

Plant species: ***Manihot esculenta***

Protein name: **ribulose 1,5 bisphosphate carboxylase-oxygenase**

PFF Mascot score: **[153]**      Sequence coverage %: **[7]**

Matched peptides No.: **[3]**      p value: **0.00069**

Calculated Mr: **51876**      Calculated pI: **5.70**

### Annotated PMF spectra:

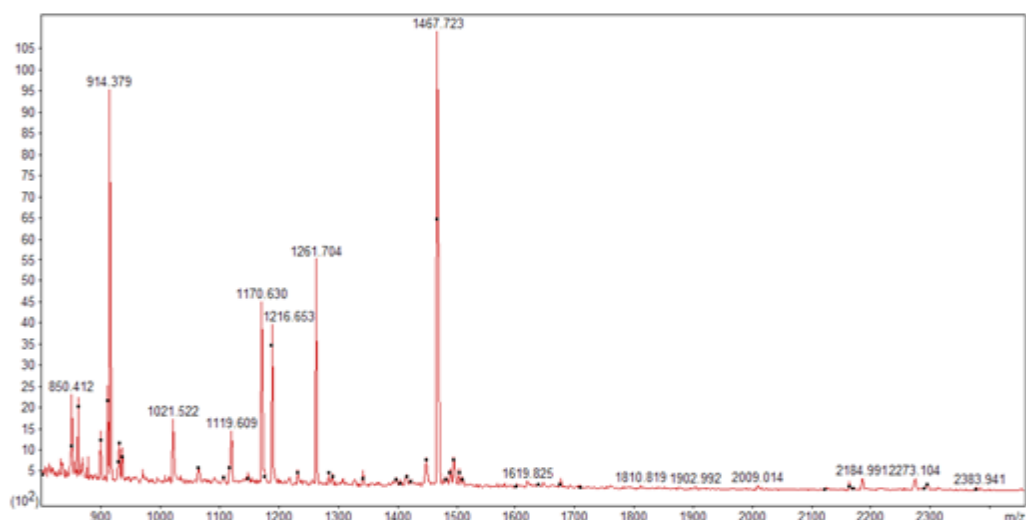

### PFF Searched Score:

Ions score is  $-10 \cdot \log(P)$ , where P is the probability that the observed match is a random event.

Individual ions scores  $> 49$  indicate identity or extensive homology ( $p < 0.05$ ).

Protein scores are derived from ions scores as a non-probabilistic basis for ranking protein hits.

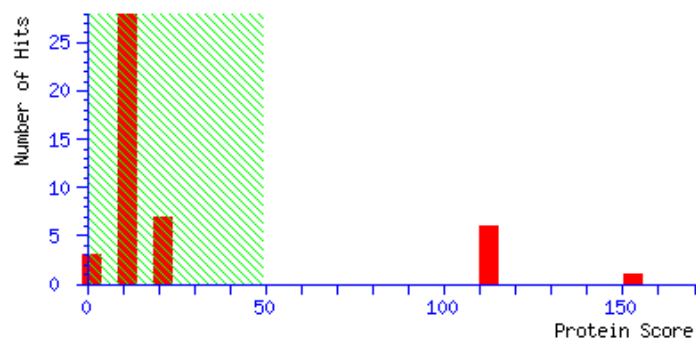

Spot No.: 142

NCBI accession No.: cassava4.1\_007756m|PACid:17993326

Plant species: *Manihot esculenta*

Protein name: **Aldolase-type TIM barrel family protein**

PFF Mascot score: [94]      Sequence coverage %: [10]

Matched peptides No.: [4]      p value: 0.00026

Calculated Mr: 48525      Calculated pI: 6.19

### Annotated PMF spectra:

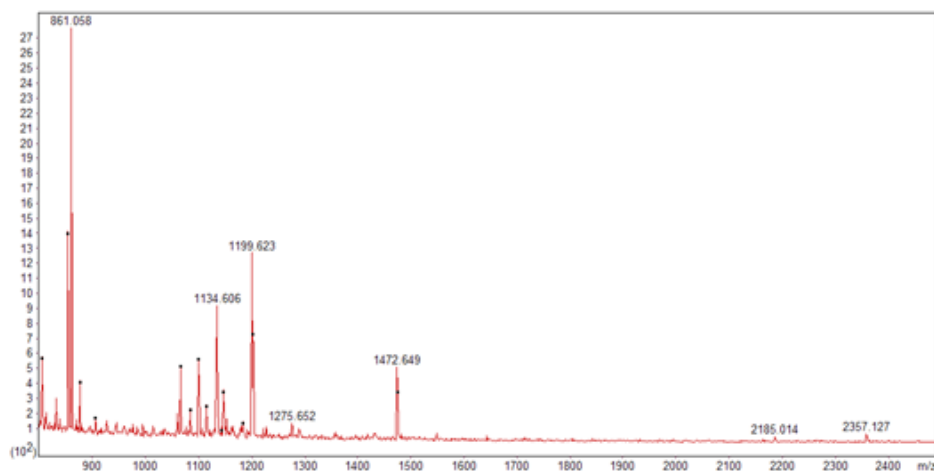

### PFF Searched Score:

Ions score is  $-10 \cdot \log(P)$ , where P is the probability that the observed match is a random event.

Individual ions scores > 33 indicate identity or extensive homology ( $p < 0.05$ ).

Protein scores are derived from ions scores as a non-probabilistic basis for ranking protein hits.

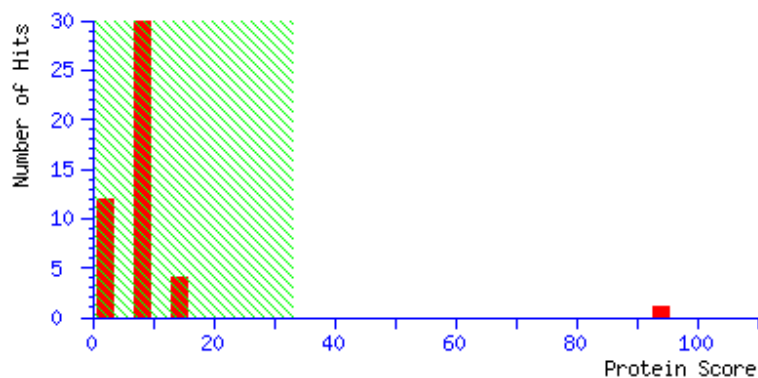



Spot No.: **143**

NCBI accession No.: **cassava4.1\_026035m|PACid:17968666**

Plant species: ***Manihot esculenta***

Protein name: **Alcohol dehydrogenase class-P**

PFF Mascot score: **[152]**      Sequence coverage %: **[20]**

Matched peptides No.: **[5]**      p value: **0.00014**

Calculated Mr: **38296**      Calculated pI: **6.02**

### Annotated PMF spectra:

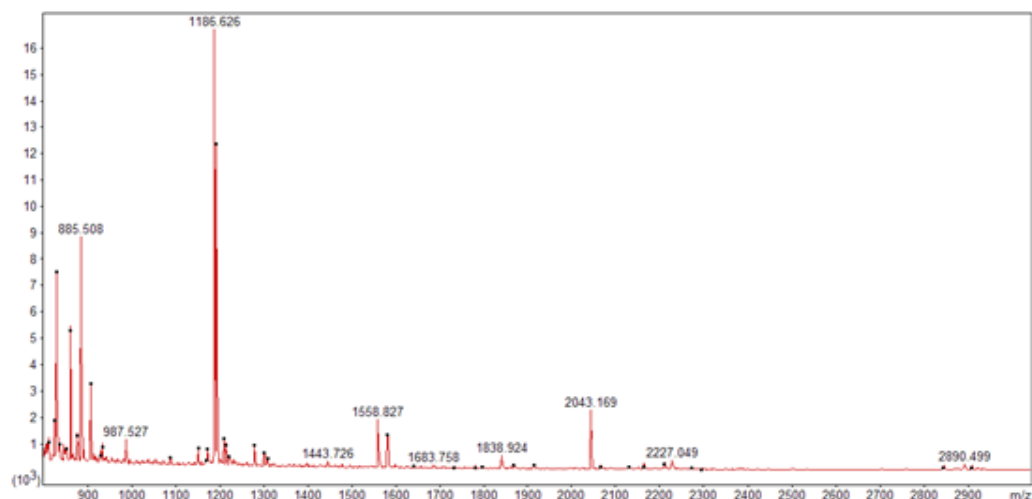

### PFF Searched Score:

Ions score is  $-10 \cdot \log(P)$ , where P is the probability that the observed match is a random event.

Individual ions scores > 33 indicate identity or extensive homology ( $p < 0.05$ ).

Protein scores are derived from ions scores as a non-probabilistic basis for ranking protein hits.

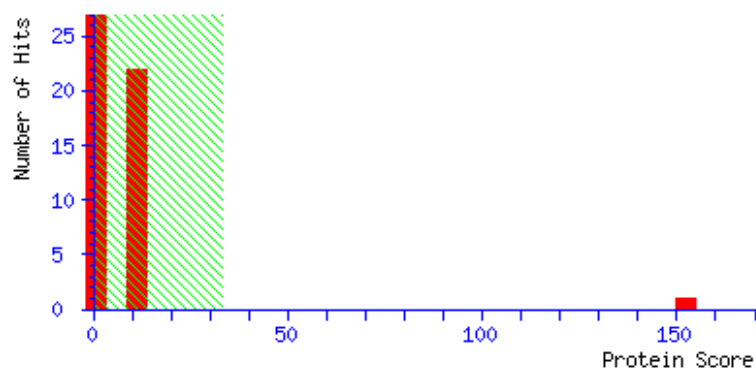

Spot No.: **144**

NCBI accession No.: *cassava4.1\_014881m*|PACid:17982856

Plant species: ***Manihot esculenta***

Protein name: **acetylornithine deacetylase-like**

PFF Mascot score: **[61]**      Sequence coverage %: **[6]**

Matched peptides No.: **[2]**      p value: **7.1e-005**

Calculated Mr: **26425**      Calculated pI: **5.50**

### Annotated PMF spectra:

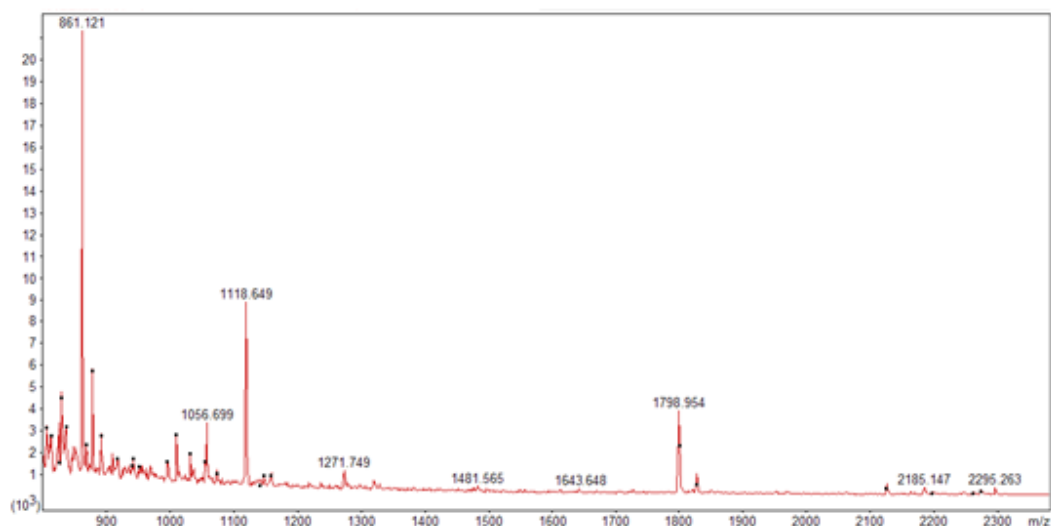

### PFF Searched Score:

Ions score is  $-10 \cdot \log(P)$ , where P is the probability that the observed match is a random event.

Individual ions scores  $> 34$  indicate identity or extensive homology ( $p < 0.05$ ).

Protein scores are derived from ions scores as a non-probabilistic basis for ranking protein hits.

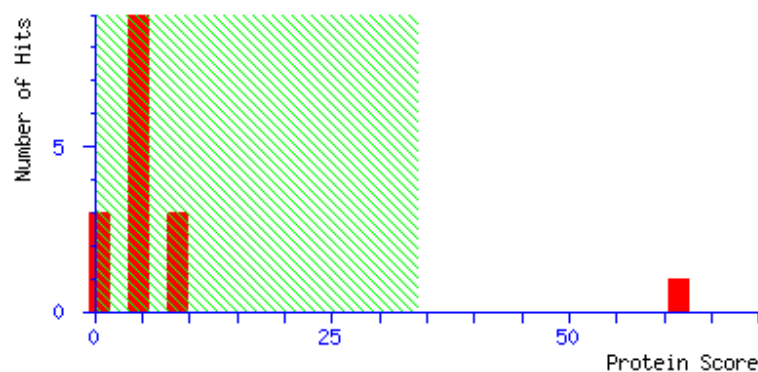

Spot No.: 145

NCBI accession No.: **cassava4.1\_009780m|PACid:17993116**

Plant species: ***Manihot esculenta***

Protein name: **Actin-7**

PFF Mascot score: **[115]**      Sequence coverage %: **[6]**

Matched peptides No.: **[2]**      p value: **2.6e-06**

Calculated Mr: **42246**      Calculated pI: **5.64**

### Annotated PMF spectra:

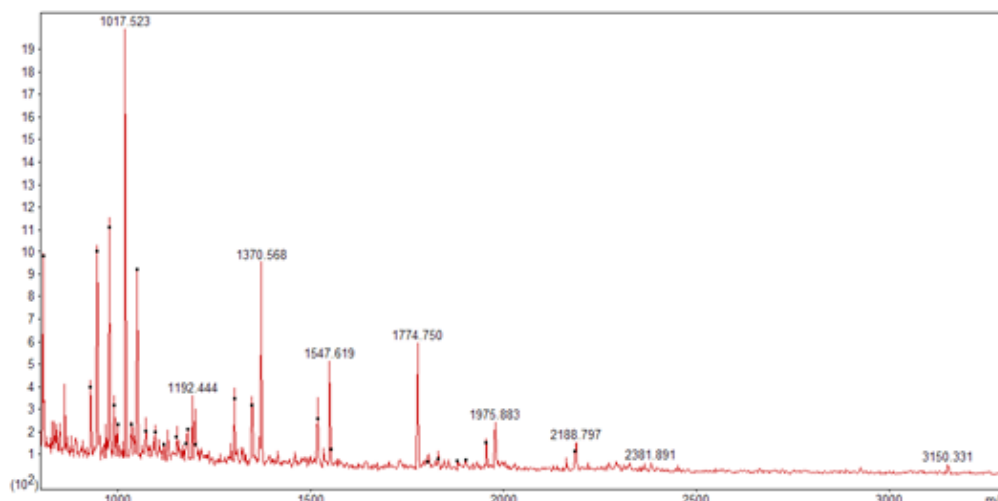

### PFF Searched Score:

Ions score is  $-10 \cdot \log(P)$ , where P is the probability that the observed match is a random event.

Individual ions scores  $> 33$  indicate identity or extensive homology ( $p < 0.05$ ).

Protein scores are derived from ions scores as a non-probabilistic basis for ranking protein hits.

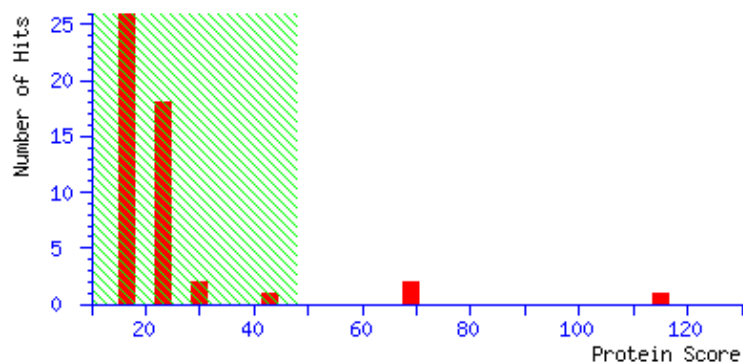

Spot No.: **146**

NCBI accession No.: **cassava4.1\_010334m|PACid:17962764**

Plant species: ***Manihot esculenta***

Protein name: **UDP-arabinopyranose mutase 3**

PFF Mascot score: **[73]**      Sequence coverage %: **[8]**

Matched peptides No.: **[2]**      p value: **4.4e-006**

Calculated Mr: **41616**      Calculated pI: **5.82**

### Annotated PMF spectra:

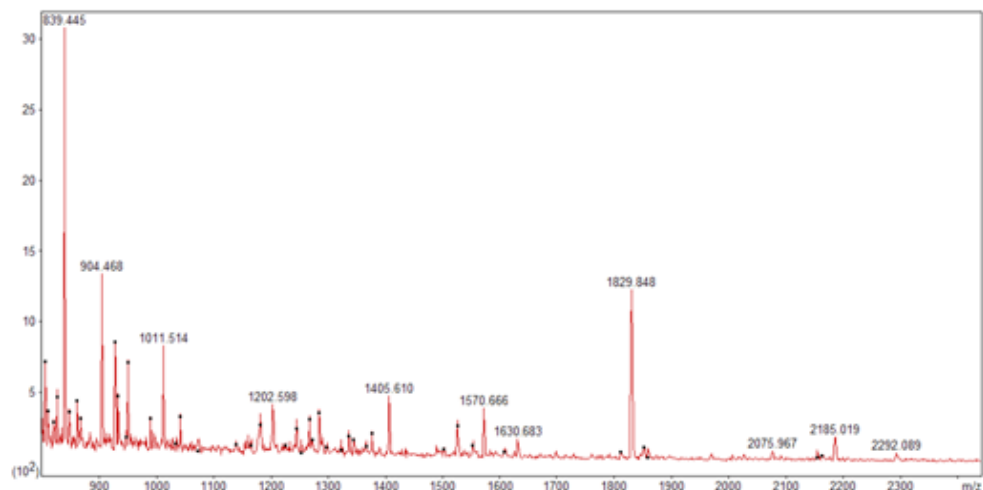

### PFF Searched Score:

Ions score is  $-10 \cdot \log(P)$ , where P is the probability that the observed match is a random event. Individual ions scores  $> 31$  indicate identity or extensive homology ( $p < 0.05$ ).

Protein scores are derived from ions scores as a non-probabilistic basis for ranking protein hits.

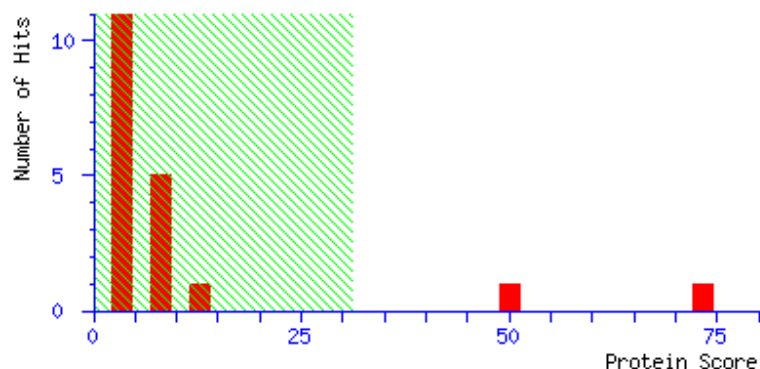

Spot No.: 147

NCBI accession No.: cassava4.1\_006605m|PACid:17968275

Plant species: *Arabidopsis thaliana*

Protein name: **Phosphoglycerate kinase 1, chloroplastic**

PFF Mascot score: [103]      Sequence coverage %: [9]

Matched peptides No.: [4]      p value: **0.00031**

Calculated Mr: **50372**      Calculated pI: **8.26**

### Annotated PMF spectra:

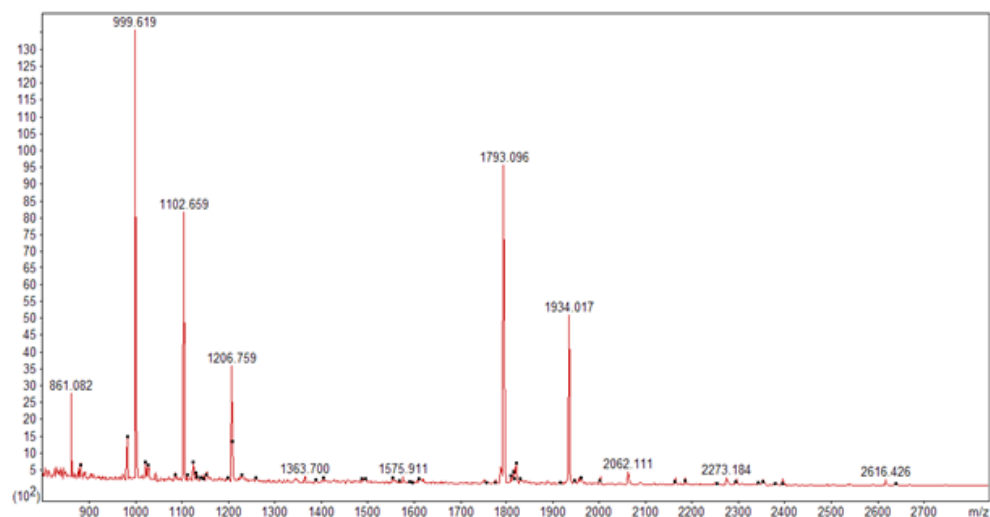

### PFF Searched Score:

Ions score is  $-10 \cdot \log(P)$ , where P is the probability that the observed match is a random event.

Individual ions scores  $> 33$  indicate identity or extensive homology ( $p < 0.05$ ).

Protein scores are derived from ions scores as a non-probabilistic basis for ranking protein hits.

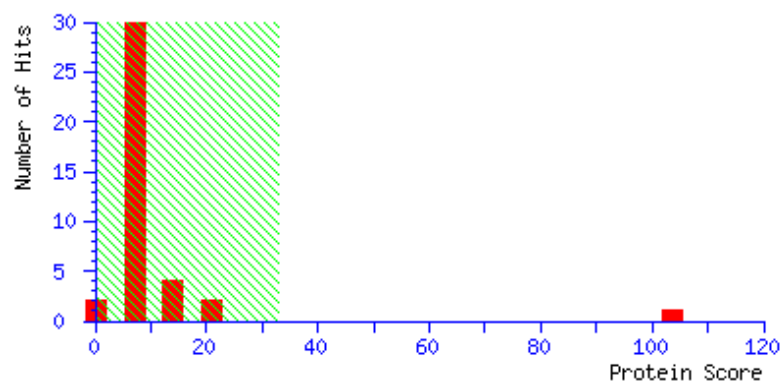

Spot No.: 148

NCBI accession No.: cassava4.1\_009233m|PACid:17991143

Plant species: *Manihot esculenta*

Protein name: Probable fructose-bisphosphate aldolase 3

PFF Mascot score: [380]      Sequence coverage %: [20]

Matched peptides No.: [7]      p value: 1.5e-010

Calculated Mr: 43050      Calculated pI: 8.63

### Annotated PMF spectra:

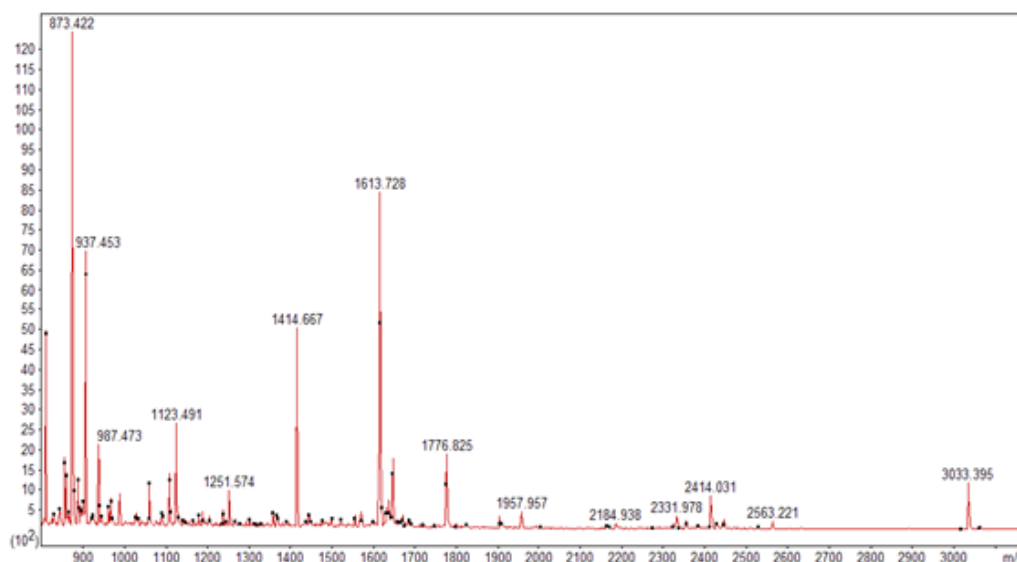

### PFF Searched Score:

Ions score is  $-10 \cdot \log(P)$ , where P is the probability that the observed match is a random event.

Individual ions scores  $> 33$  indicate identity or extensive homology ( $p < 0.05$ ).

Protein scores are derived from ions scores as a non-probabilistic basis for ranking protein hits.

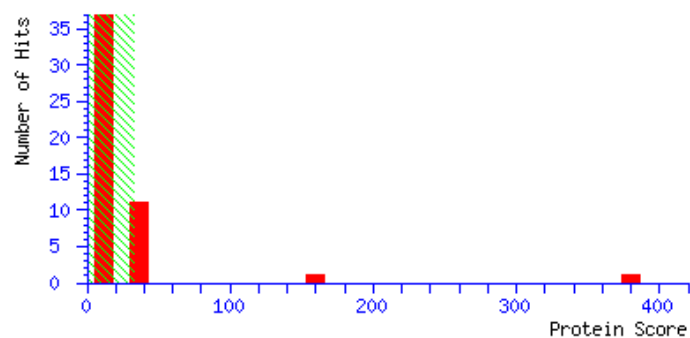

Spot No.: **149**

NCBI accession No.: **cassava4.1\_009217m|PACid:17976496**

Plant species: ***Manihot esculenta***

Protein name: **fructose-bisphosphate aldolase, putative**

PFF Mascot score: **[118]**      Sequence coverage %: **[15]**

Matched peptides No.: **[4]**      p value: **0.00029**

Calculated Mr: **24559**      Calculated pI: **8.93**

### Annotated PMF spectra:

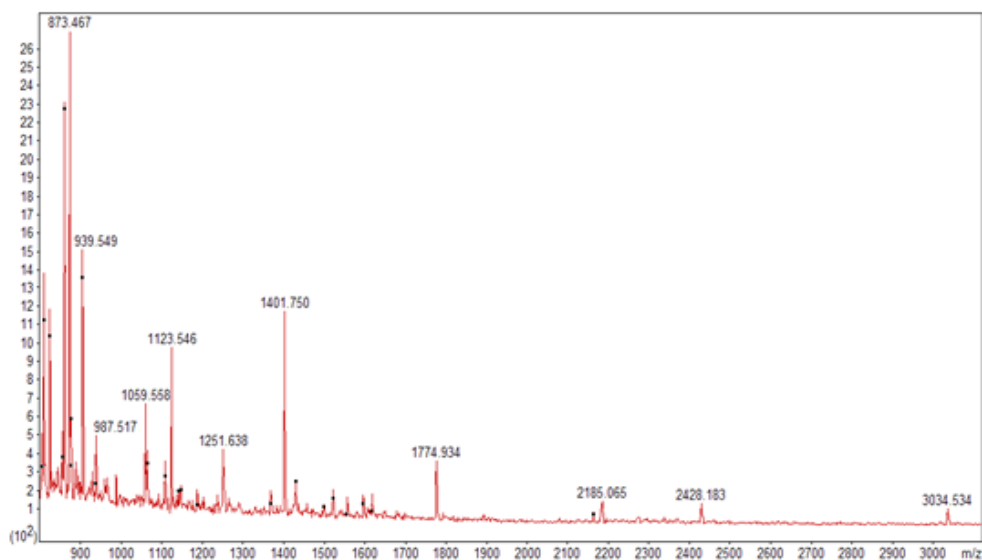

### PFF Searched Score:

Ions score is  $-10 \cdot \log(P)$ , where P is the probability that the observed match is a random event.

Individual ions scores  $> 34$  indicate identity or extensive homology ( $p < 0.05$ ).

Protein scores are derived from ions scores as a non-probabilistic basis for ranking protein hits.

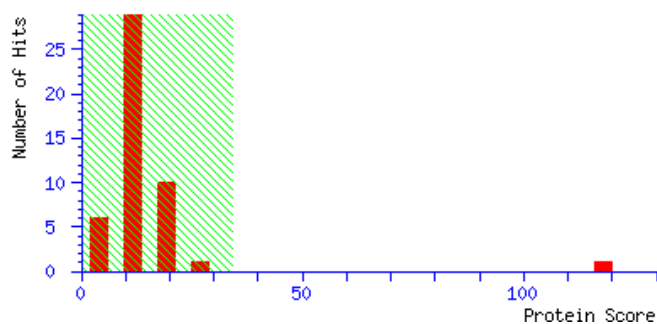

Spot No.: **150**

NCBI accession No.: *cassava4.1\_022763m*|PACid:17989911

Plant species: ***Manihot esculenta***

Protein name: **aldo/keto reductase AKR**

PFF Mascot score: **[69]**      Sequence coverage %: **[10]**

Matched peptides No.: **[2]**      p value: **9.7e-005**

Calculated Mr: **15199**      Calculated pI: **7.72**

### Annotated PMF spectra:

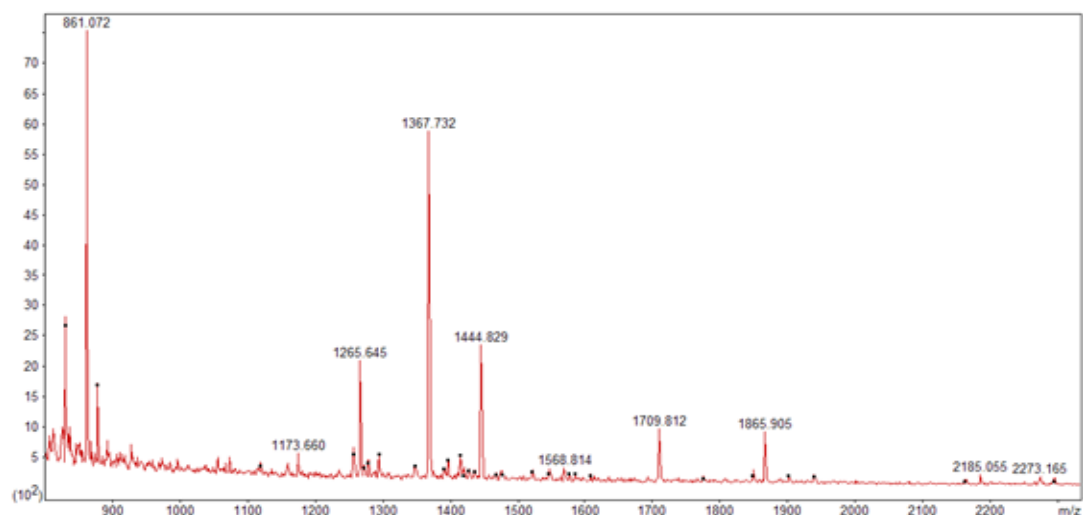

### PFF Searched Score:

Ions score is  $-10 \cdot \log(P)$ , where P is the probability that the observed match is a random event.

Individual ions scores  $> 33$  indicate identity or extensive homology ( $p < 0.05$ ).

Protein scores are derived from ions scores as a non-probabilistic basis for ranking protein hits.

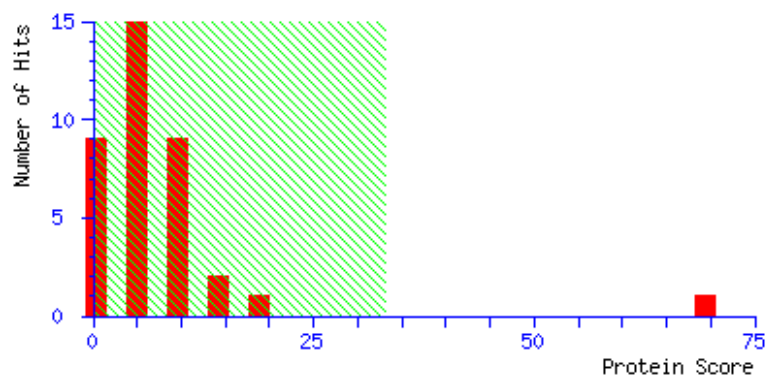



Spot No.: **151**

NCBI accession No.: *cassava4.1\_011584m*|PACid:17982732

Plant species: ***Manihot esculenta***

Protein name: **Probable fructokinase-1**

PFF Mascot score: **[110]**      Sequence coverage %: **[16]**

Matched peptides No.: **[4]**      p value: **0.00064**

Calculated Mr: **35621**      Calculated pI: **5.12**

### Annotated PMF spectra:

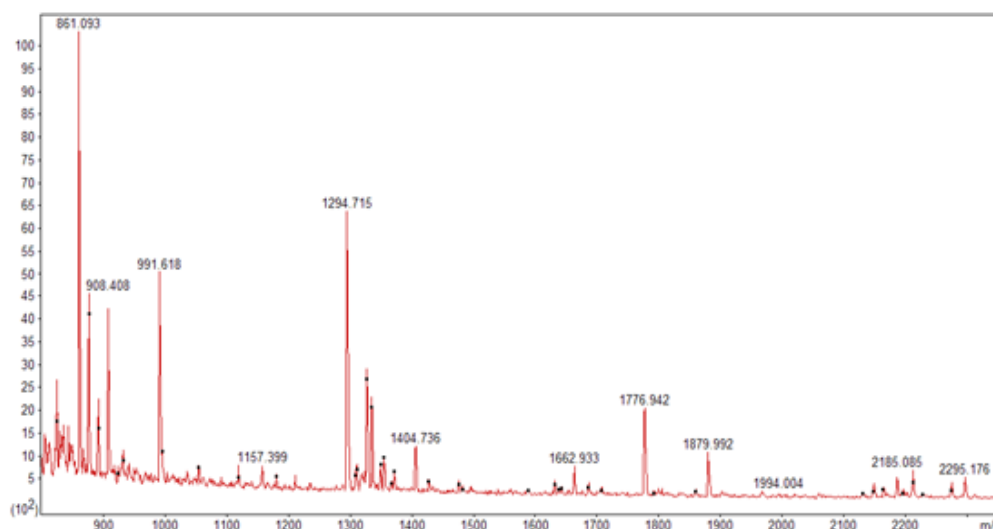

### PFF Searched Score:

Ions score is  $-10 \cdot \log(P)$ , where P is the probability that the observed match is a random event.

Individual ions scores  $> 33$  indicate identity or extensive homology ( $p < 0.05$ ).

Protein scores are derived from ions scores as a non-probabilistic basis for ranking protein hits.

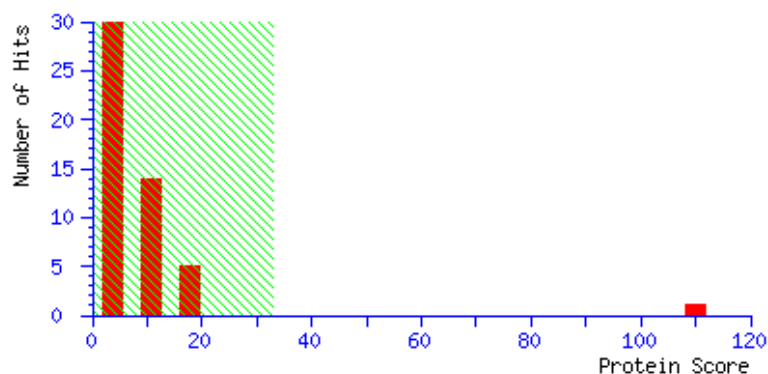

Spot No.: **152**

NCBI accession No.: *cassava4.1\_025676m*|PACid:17984832

Plant species: ***Manihot esculenta***

Protein name: **Similar to late embryogenesis abundant proteins**

PFF Mascot score: **[125]**      Sequence coverage %: **[14]**

Matched peptides No.: **[3]**      p value: **7.1e-006**

Calculated Mr: **34906**      Calculated pI: **4.75**

### Annotated PMF spectra:

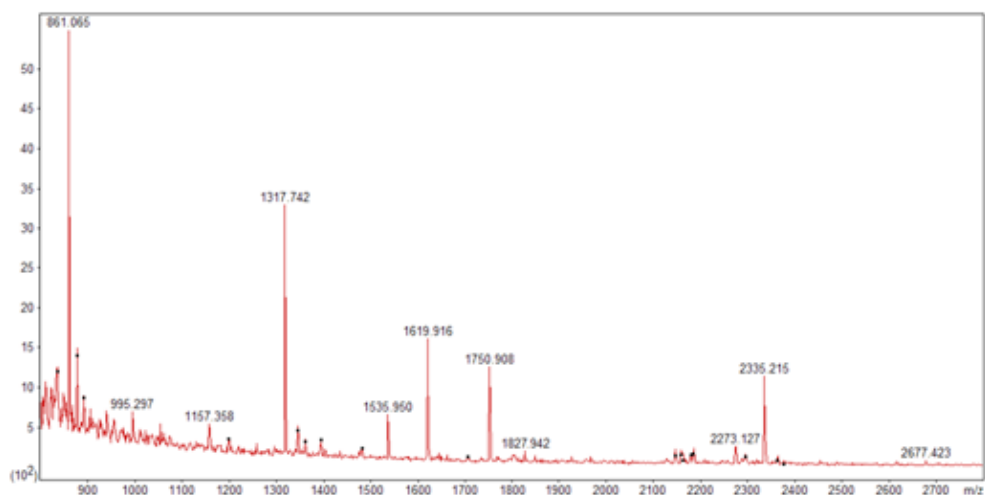

### PFF Searched Score:

Ions score is  $-10 \cdot \log(P)$ , where P is the probability that the observed match is a random event

Individual ions scores  $> 33$  indicate identity or extensive homology ( $p < 0.05$ ).

Protein scores are derived from ions scores as a non-probabilistic basis for ranking protein hits.

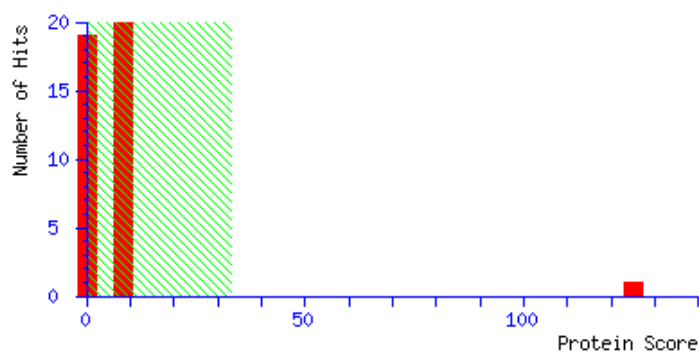

Spot No.: **153**

NCBI accession No.: *cassava4.1\_009779m*|PACid:17990964

Plant species: ***Manihot esculenta***

Protein name: **Actin-7**

PFF Mascot score: **[62]**      Sequence coverage %: **[7]**

Matched peptides No.: **[3]**      p value: **0.0079**

Calculated Mr: **41897**      Calculated pI: **5.31**

### Annotated PMF spectra:

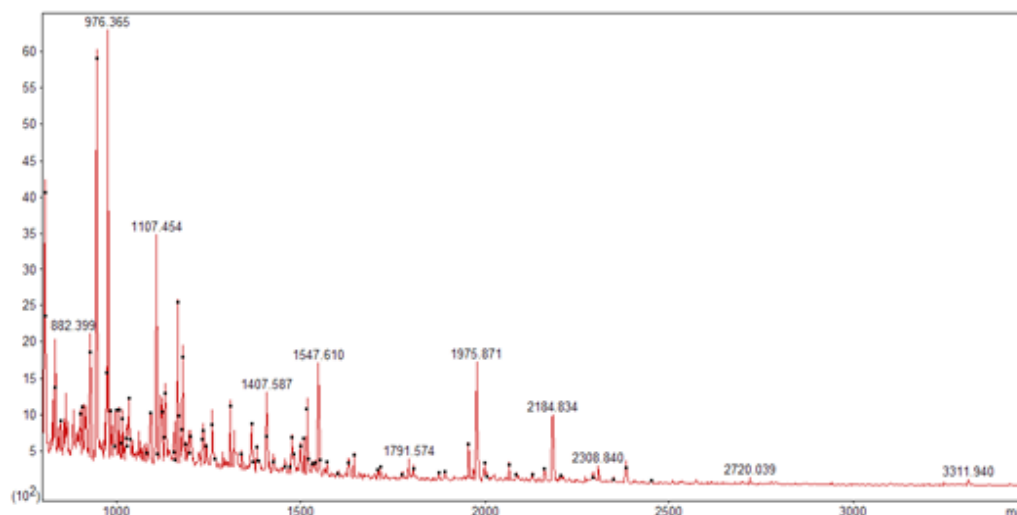

### PFF Searched Score:

Ions score is  $-10 \cdot \log(P)$ , where P is the probability that the observed match is a random event.

Individual ions scores  $> 34$  indicate identity or extensive homology ( $p < 0.05$ ).

Protein scores are derived from ions scores as a non-probabilistic basis for ranking protein hits.

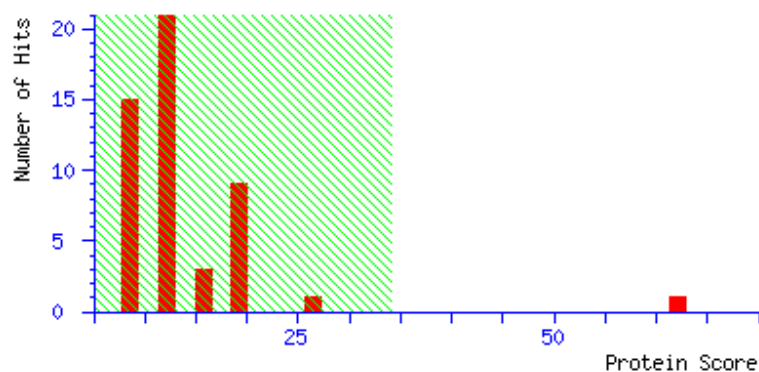

Spot No.: **154**

NCBI accession No.: *cassava4.1\_013984m*|PACid:17980530

Plant species: ***Manihot esculenta***

Protein name: **26S proteasome non-ATPase regulatory subunit 8 homolog A**

PFF Mascot score: **[343]**      Sequence coverage %: **[37]**

Matched peptides No.: **[7]**      p value: **0.0000000028**

Calculated Mr: 30915      Calculated pI: 4.93

### Annotated PMF spectra:

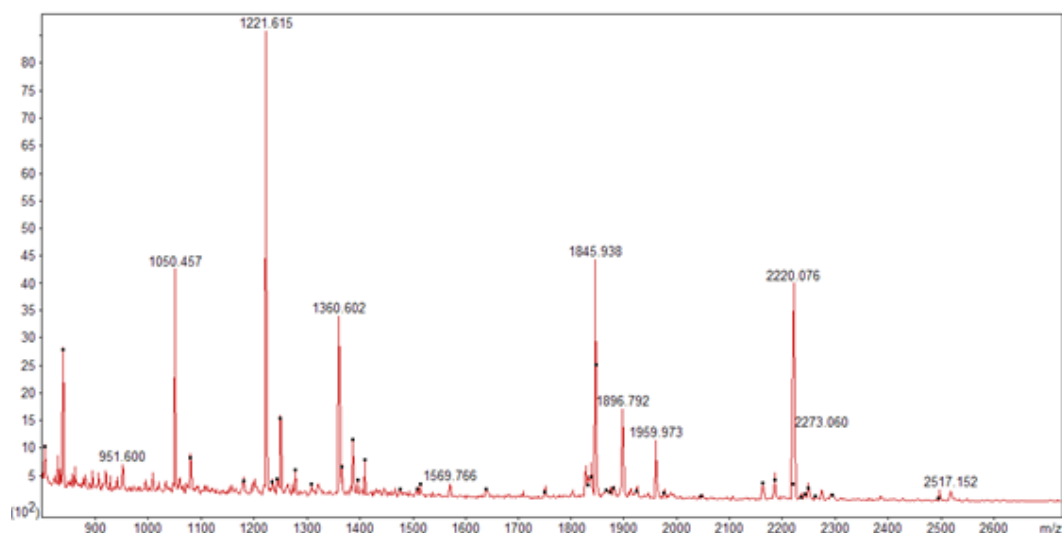

### PFF Searched Score:

Ions score is  $-10 \cdot \log(P)$ , where P is the probability that the observed match is a random event.

Individual ions scores  $> 33$  indicate identity or extensive homology ( $p < 0.05$ ).

Protein scores are derived from ions scores as a non-probabilistic basis for ranking protein hits.

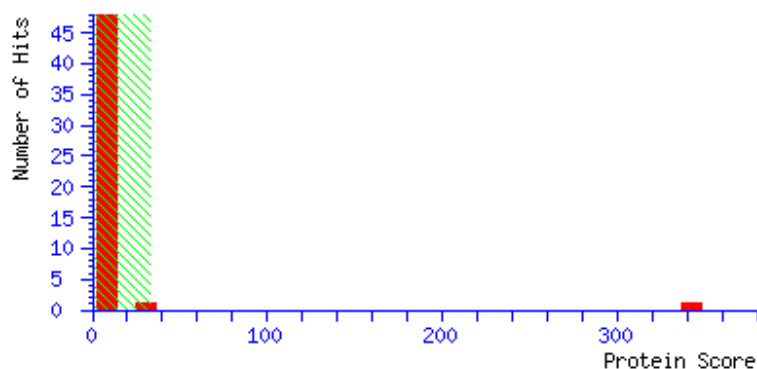

Spot No.: **155**

NCBI accession No.: **cassava4.1\_014432m|PACid:17967798**

Plant species: ***Manihot esculenta***

Protein name: **Triosephosphate isomerase, cytosolic**

PFF Mascot score: **[107]**      Sequence coverage %: **[10]**

Matched peptides No.: **[2]**      p value: **3.9e-007**

Calculated Mr: **27729**      Calculated pI: **5.77**

### Annotated PMF spectra:

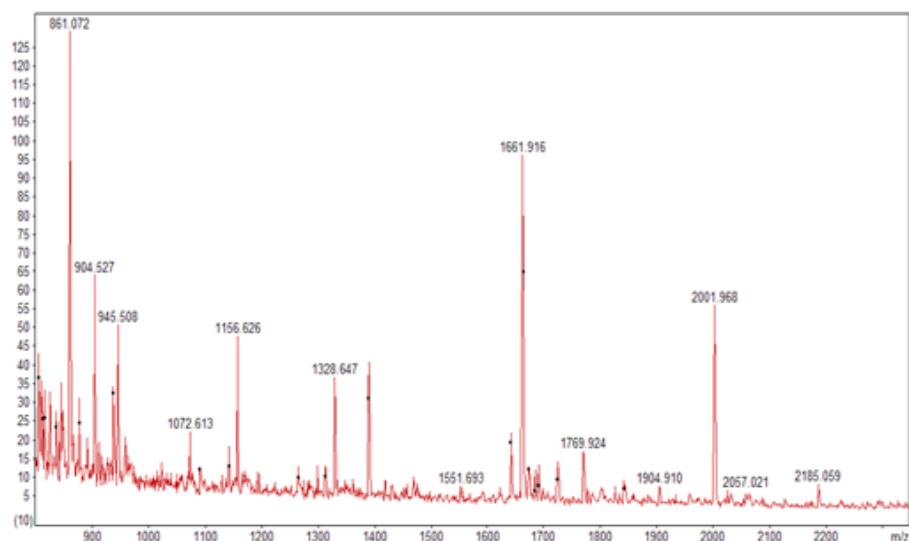

### PFF Searched Score:

Ions score is  $-10 \cdot \log(P)$ , where P is the probability that the observed match is a random event.

Individual ions scores  $> 34$  indicate identity or extensive homology ( $p < 0.05$ ).

Protein scores are derived from ions scores as a non-probabilistic basis for ranking protein hits.

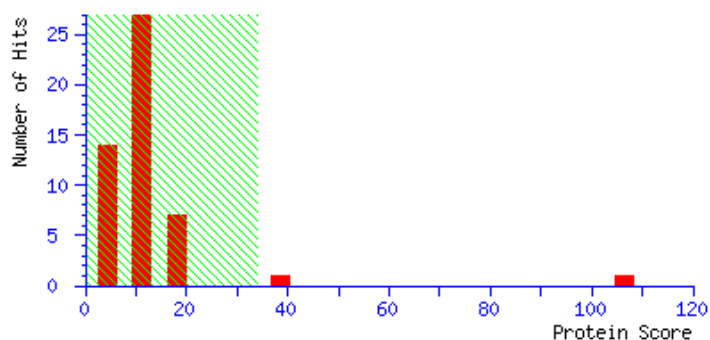

Spot No.: **156**

NCBI accession No.: *cassava4.1\_015127m|PACid:17970169*

Plant species: ***Manihot esculenta***

Protein name: **Proteasome subunit alpha type-5-A**

PFF Mascot score: **[123]**      Sequence coverage %: **[10]**

Matched peptides No.: **[3]**      p value: **9.4e-005**

Calculated Mr: **26165**      Calculated pI: **4.70**

### Annotated PMF spectra:

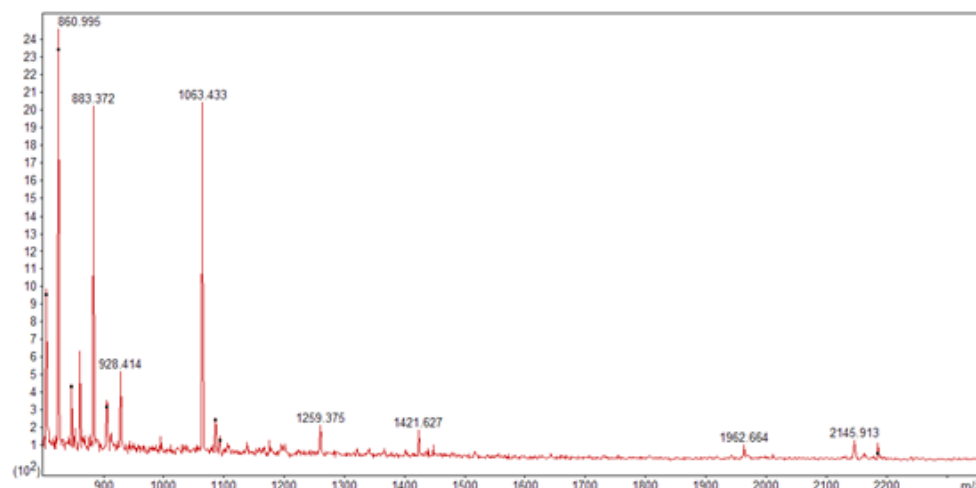

### PFF Searched Score:

Ions score is  $-10 \cdot \log(P)$ , where P is the probability that the observed match is a random event.

Individual ions scores  $> 34$  indicate identity or extensive homology ( $p < 0.05$ ).

Protein scores are derived from ions scores as a non-probabilistic basis for ranking protein hits.

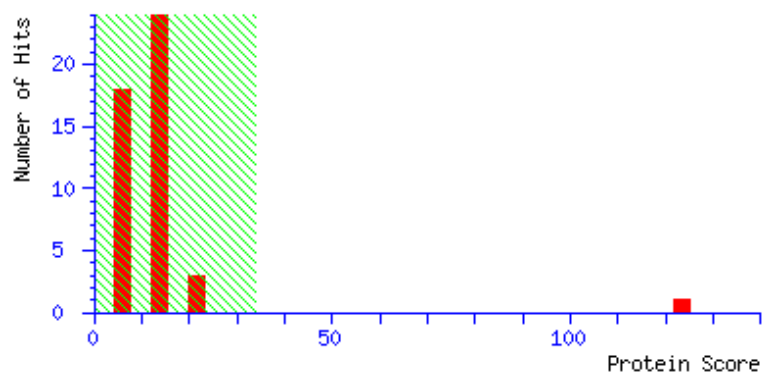

Spot No.: **157**

NCBI accession No.: *cassava4.1\_015667m|PACid:17963200*

Plant species: ***Manihot esculenta***

Protein name: **Proteasome subunit beta type-1**

PFF Mascot score: **[61]**      Sequence coverage %: **[8]**

Matched peptides No.: **[2]**      p value: **7.2e-005**

Calculated Mr: **24884**      Calculated pI: **6.42**

### Annotated PMF spectra:

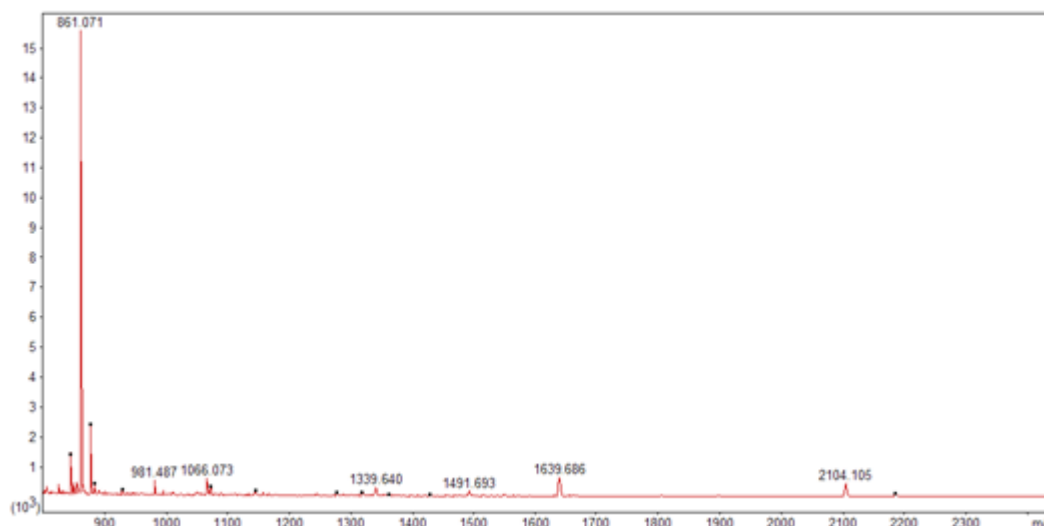

### PFF Searched Score:

Ions score is  $-10 \cdot \log(P)$ , where P is the probability that the observed match is a random event. Individual ions scores  $> 34$  indicate identity or extensive homology ( $p < 0.05$ ). Protein scores are derived from ions scores as a non-probabilistic basis for ranking protein hits.

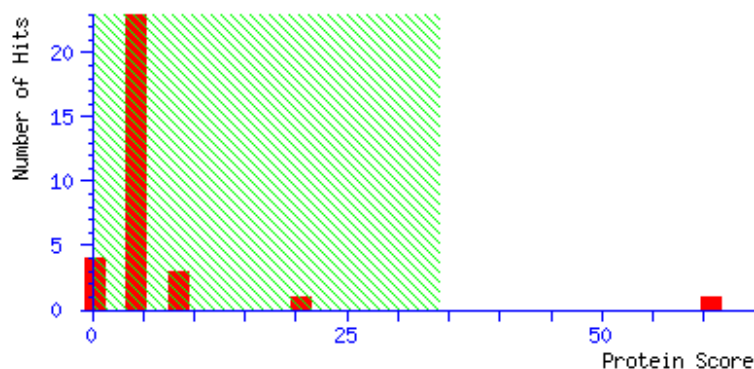

Spot No.: **158**

NCBI accession No.: **cassava4.1\_014674m|PACid:17976440**

Plant species: ***Manihot esculenta***

Protein name: **3-isopropylmalate dehydratase small subunit 3**

PFF Mascot score: **[292]**

Sequence coverage %: **[26]**

Matched peptides No.: **[4]**

p value: **9.3e-007**

Calculated Mr: **26948**

Calculated pI: **6.52**

### Annotated PMF spectra:

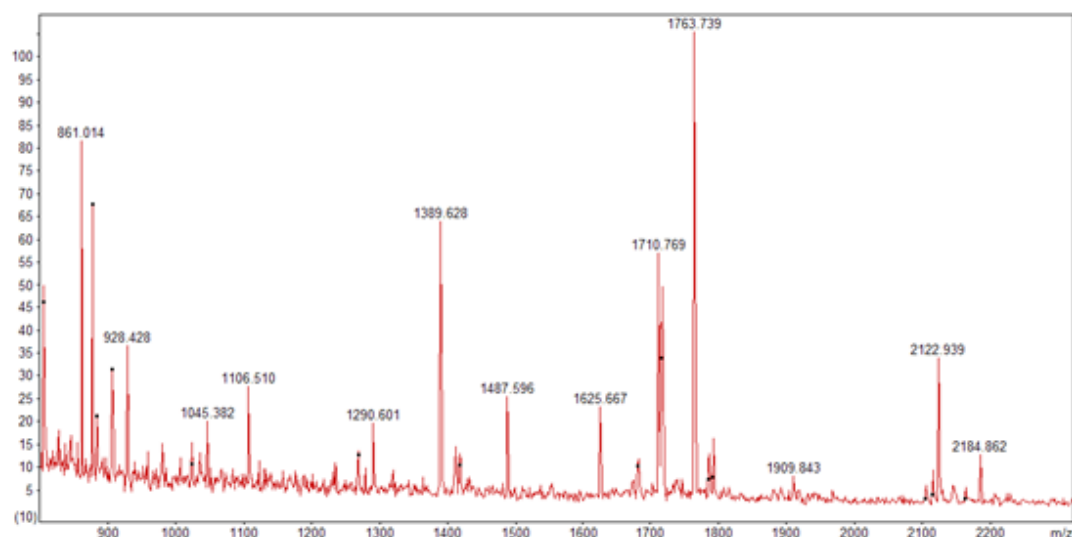

### PFF Searched Score:

Ions score is  $-10 \cdot \log(P)$ , where P is the probability that the observed match is a random event.

Individual ions scores  $> 33$  indicate identity or extensive homology ( $p < 0.05$ ).

Protein scores are derived from ions scores as a non-probabilistic basis for ranking protein hits.

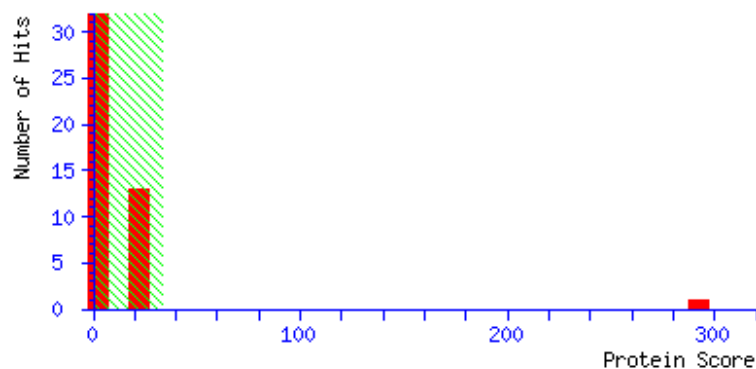



Spot No.: **159**

NCBI accession No.: **cassava4.1\_016068m|PACid:17988757**

Plant species: ***Manihot esculenta***

Protein name: **glutathione-s-transferase theta, gst,**

PFF Mascot score: **[192]**      Sequence coverage %: **[24]**

Matched peptides No.: **[4]**      p value: **1.7e-005**

Calculated Mr: **23848**      Calculated pI: **6.17**

### Annotated PMF spectra:

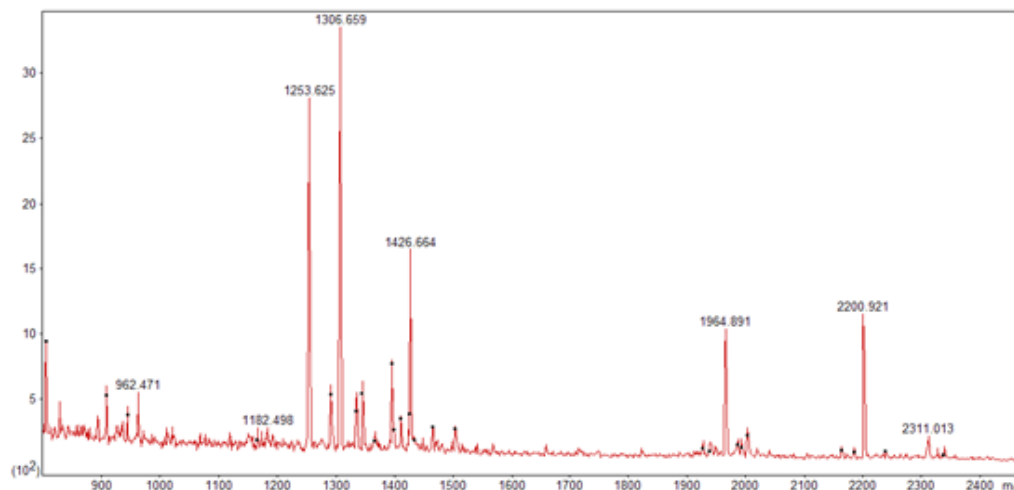

### PFF Searched Score:

Ions score is  $-10 \cdot \log(P)$ , where P is the probability that the observed match is a random event.

Individual ions scores  $> 34$  indicate identity or extensive homology ( $p < 0.05$ ).

Protein scores are derived from ions scores as a non-probabilistic basis for ranking protein hits.

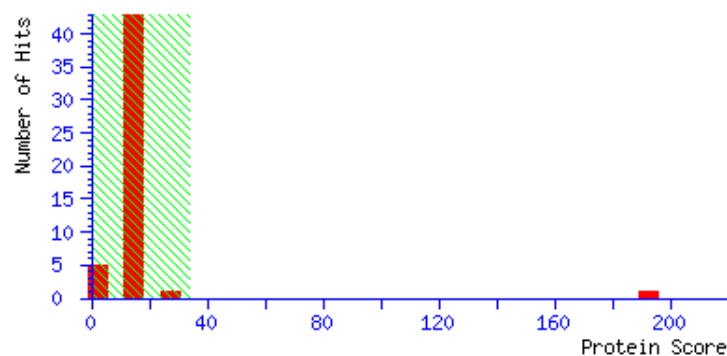

Spot No.: **160**

NCBI accession No.: *cassava4.1\_013921m*|PACid:17992320

Plant species: ***Manihot esculenta***

Protein name: **peroxiredoxin**

PFF Mascot score: **[79]**      Sequence coverage %: **[9]**

Matched peptides No.: **[2]**      p value: **1.4e-006**

Calculated Mr: **29562**      Calculated pI: **7.66**

### Annotated PMF spectra:

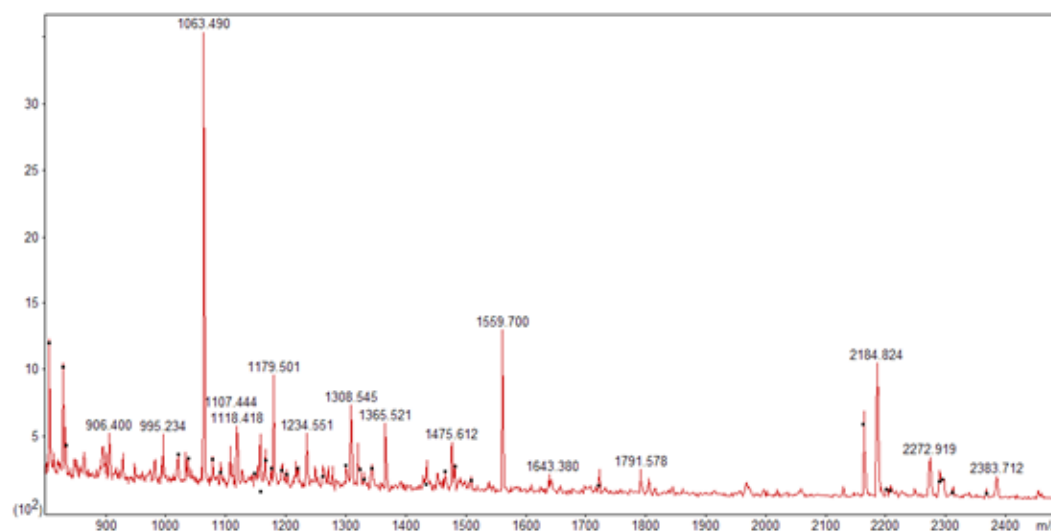

### PFF Searched Score:

Ions score is  $-10 \cdot \log(P)$ , where P is the probability that the observed match is a random event.

Individual ions scores  $> 33$  indicate identity or extensive homology ( $p < 0.05$ ).

Protein scores are derived from ions scores as a non-probabilistic basis for ranking protein hits.

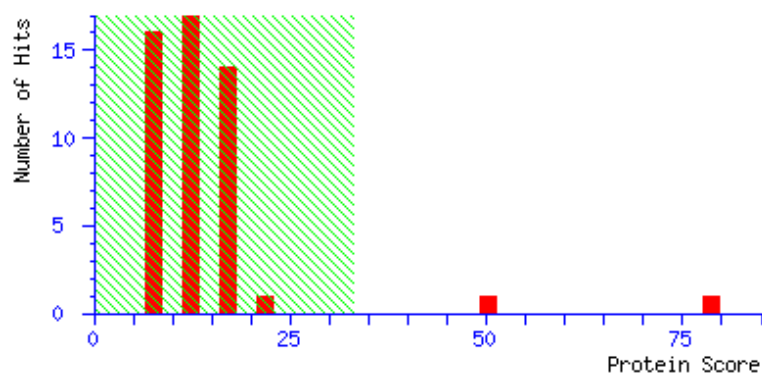

Spot No.: **161**

NCBI accession No.: *cassava4.1\_015116m|PACid:17987913*

Plant species: ***Manihot esculenta***

Protein name: **conserved hypothetical protein**

PFF Mascot score: **[173]**      Sequence coverage %: **[13]**

Matched peptides No.: **[2]**      p value: **2.7e-008**

Calculated Mr: **26233**      Calculated pI: **5.98**

### Annotated PMF spectra:

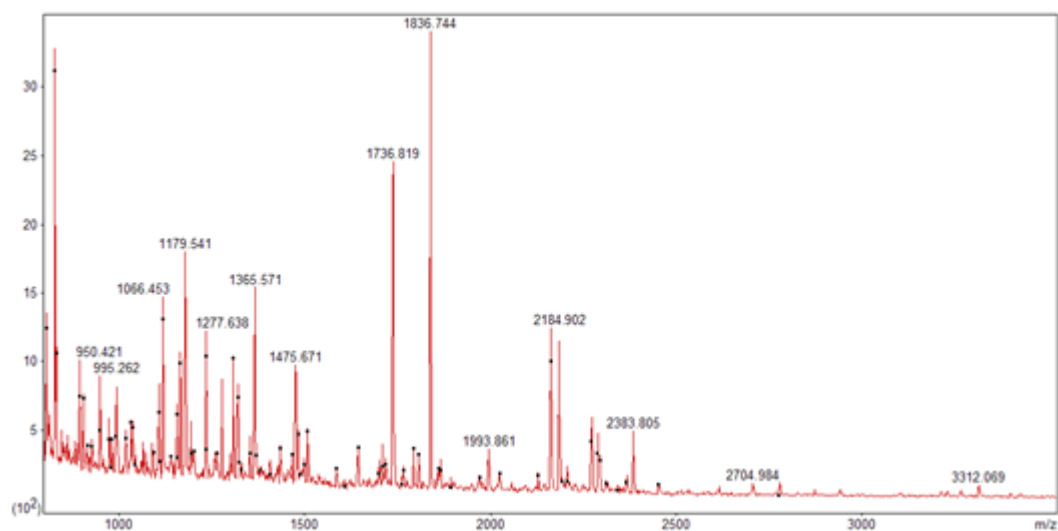

### PFF Searched Score:

Ions score is  $-10 \cdot \log(P)$ , where P is the probability that the observed match is a random event.

Individual ions scores  $> 34$  indicate identity or extensive homology ( $p < 0.05$ ).

Protein scores are derived from ions scores as a non-probabilistic basis for ranking protein hits.

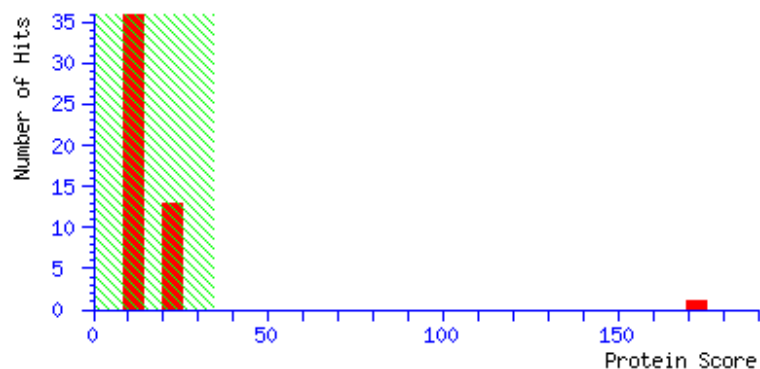

Spot No.: **162**

NCBI accession No.: *cassava4.1\_019468m*|PACid:17983825

Plant species: ***Manihot esculenta***

Protein name: **Small ubiquitin-related modifier**

PFF Mascot score: **[88]**      Sequence coverage %: **[22]**

Matched peptides No.: **[2]**      p value: **0.00045**

Calculated Mr: **12426**      Calculated pI: **4.95**

### Annotated PMF spectra:

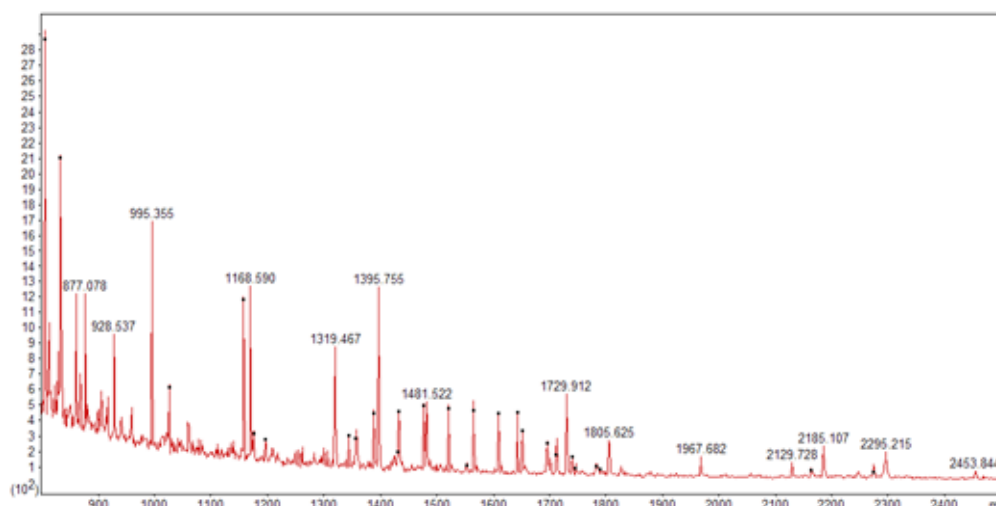

### PFF Searched Score:

Ions score is  $-10 \cdot \log(P)$ , where P is the probability that the observed match is a random event.

Individual ions scores  $> 33$  indicate identity or extensive homology ( $p < 0.05$ ).

Protein scores are derived from ions scores as a non-probabilistic basis for ranking protein hits.

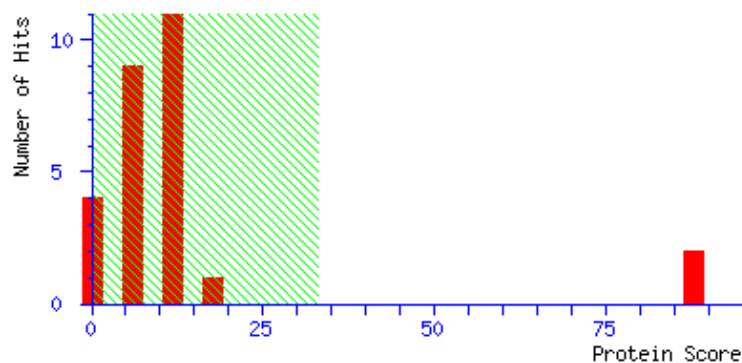

Spot No.: **163**

NCBI accession No.: **cassava4.1\_009782m|PACid:17988600**

Plant species: ***Manihot esculenta***

Protein name: **actin**

PFF Mascot score: **78**      Sequence coverage %: **31**

Matched peptides No.: **8**      p value: **0.0026**

Calculated Mr: **32104**      Calculated pI: **4.92**

### Annotated PMF spectra:

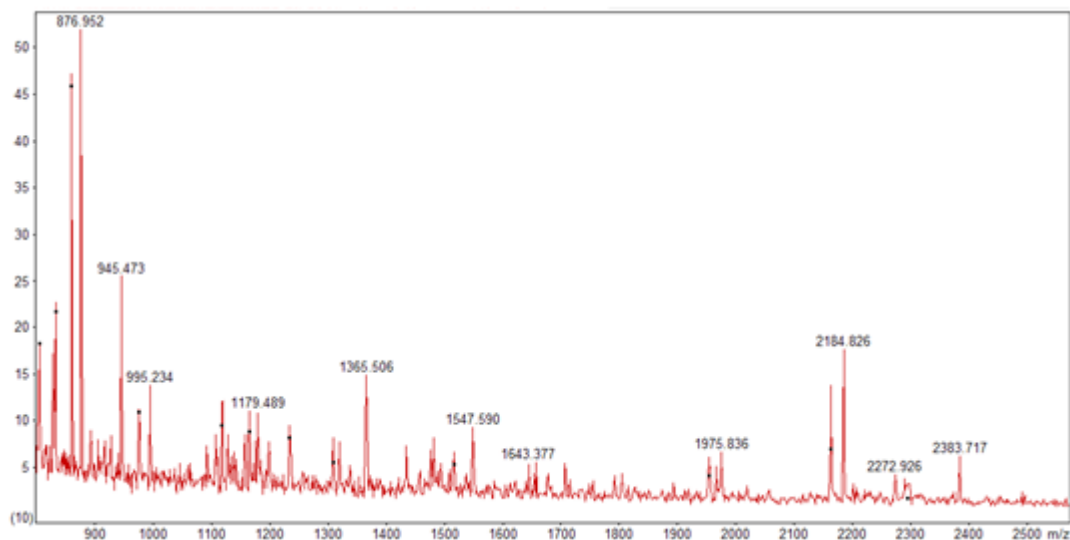

### PFF Searched Score:

Protein score is  $-10 \cdot \log(P)$ , where P is the probability that the observed match is a random event. Protein scores greater than 61 are significant ( $p < 0.05$ ).

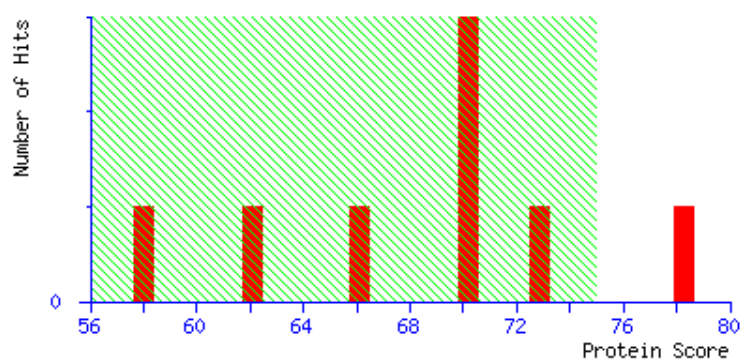

Spot No.: **164**

NCBI accession No.: *cassava4.1\_018266m*|PACid:17987264

Plant species: ***Manihot esculenta***

Protein name: **Ubiquitin-conjugating enzyme E2 35**

PFF Mascot score: **[88]**      Sequence coverage %: **[26]**

Matched peptides No.: **[5]**      p value: **0.00011**

Calculated Mr: **17266**      Calculated *pI*: **6.74**

### Annotated PMF spectra:

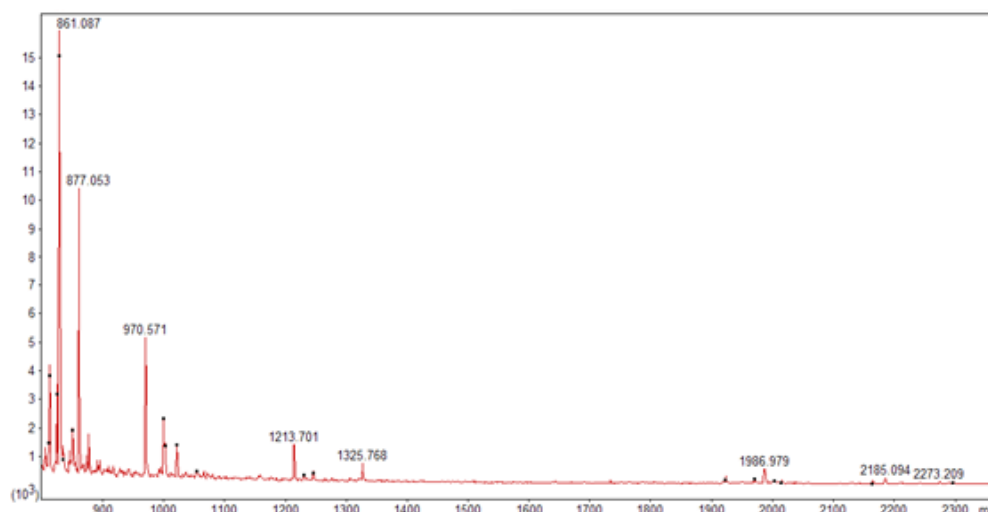

### PFF Searched Score:

Ions score is  $-10 \cdot \log(P)$ , where  $P$  is the probability that the observed match is a random event.

Individual ions scores  $> 33$  indicate identity or extensive homology ( $p < 0.05$ ).

Protein scores are derived from ions scores as a non-probabilistic basis for ranking protein hits.

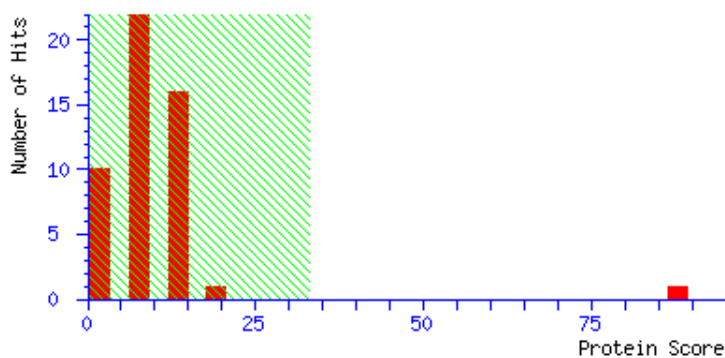

Spot No.: **165**

NCBI accession No.: **cassava4.1\_018546m|PACid:17976766**

Plant species: ***Manihot esculenta***

Protein name: **Putative uncharacterized protein At3g56490**

PFF Mascot score: **[153]**

Sequence coverage %: **[17]**

Matched peptides No.: **[2]**

p value: **1.3e-007**

Calculated Mr: **15944**

Calculated pI: **6.36**

### **Annotated PMF spectra:**

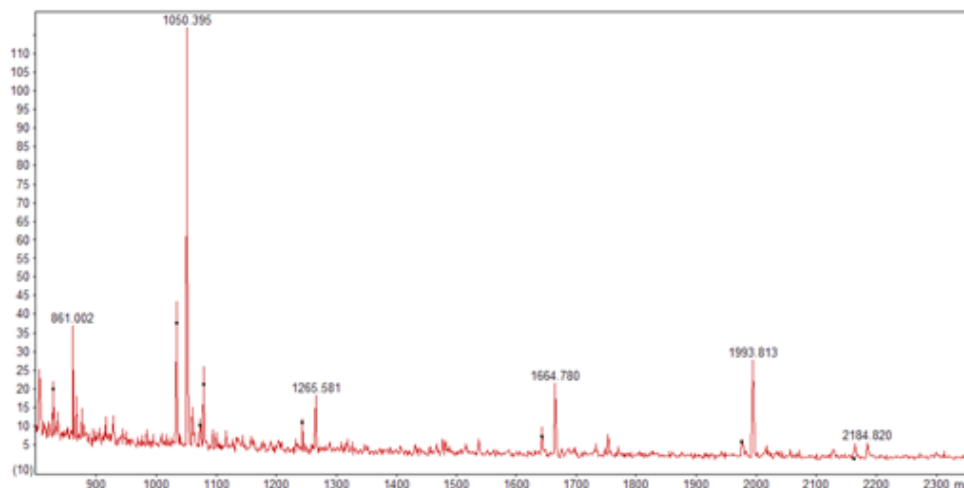

### **PFF Searched Score:**

Ions score is  $-10 \cdot \log(P)$ , where P is the probability that the observed match is a random event.

Individual ions scores  $> 34$  indicate identity or extensive homology ( $p < 0.05$ ).

Protein scores are derived from ions scores as a non-probabilistic basis for ranking protein hits.

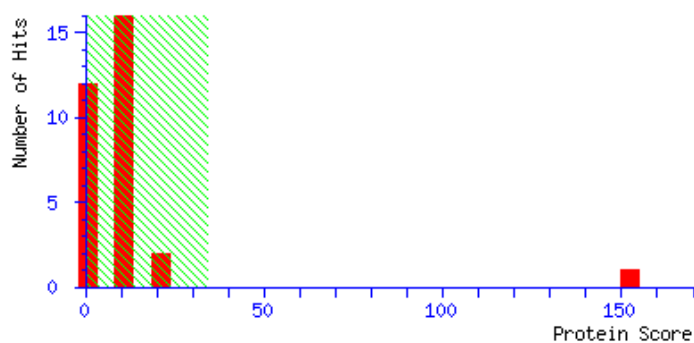

**Supplemental Figure S4: Main pathway ways overexpressed in all the differential proteins.**

Enzymes exhibiting differential expression during tubernization are marked in green and red color. Marked in light green are enzymes that changed to some extent exhibit. Marked in red are the dramatically up-regulated enzymes. Marked in white are the not detected enzymes or general enzyme categories. Enzyme annotation was obtained from the protein sequence annotation and GO classification data.

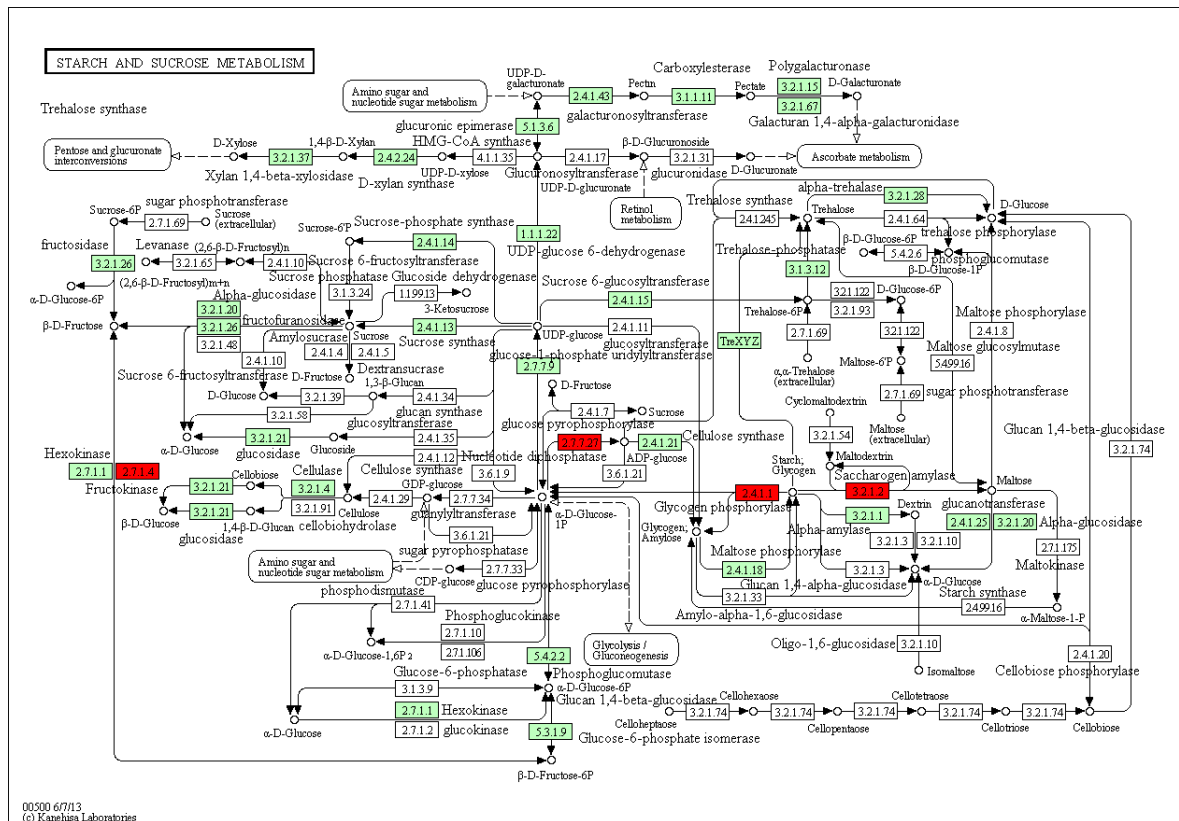



GLYCOLYSIS / GLUCONEOGENESIS

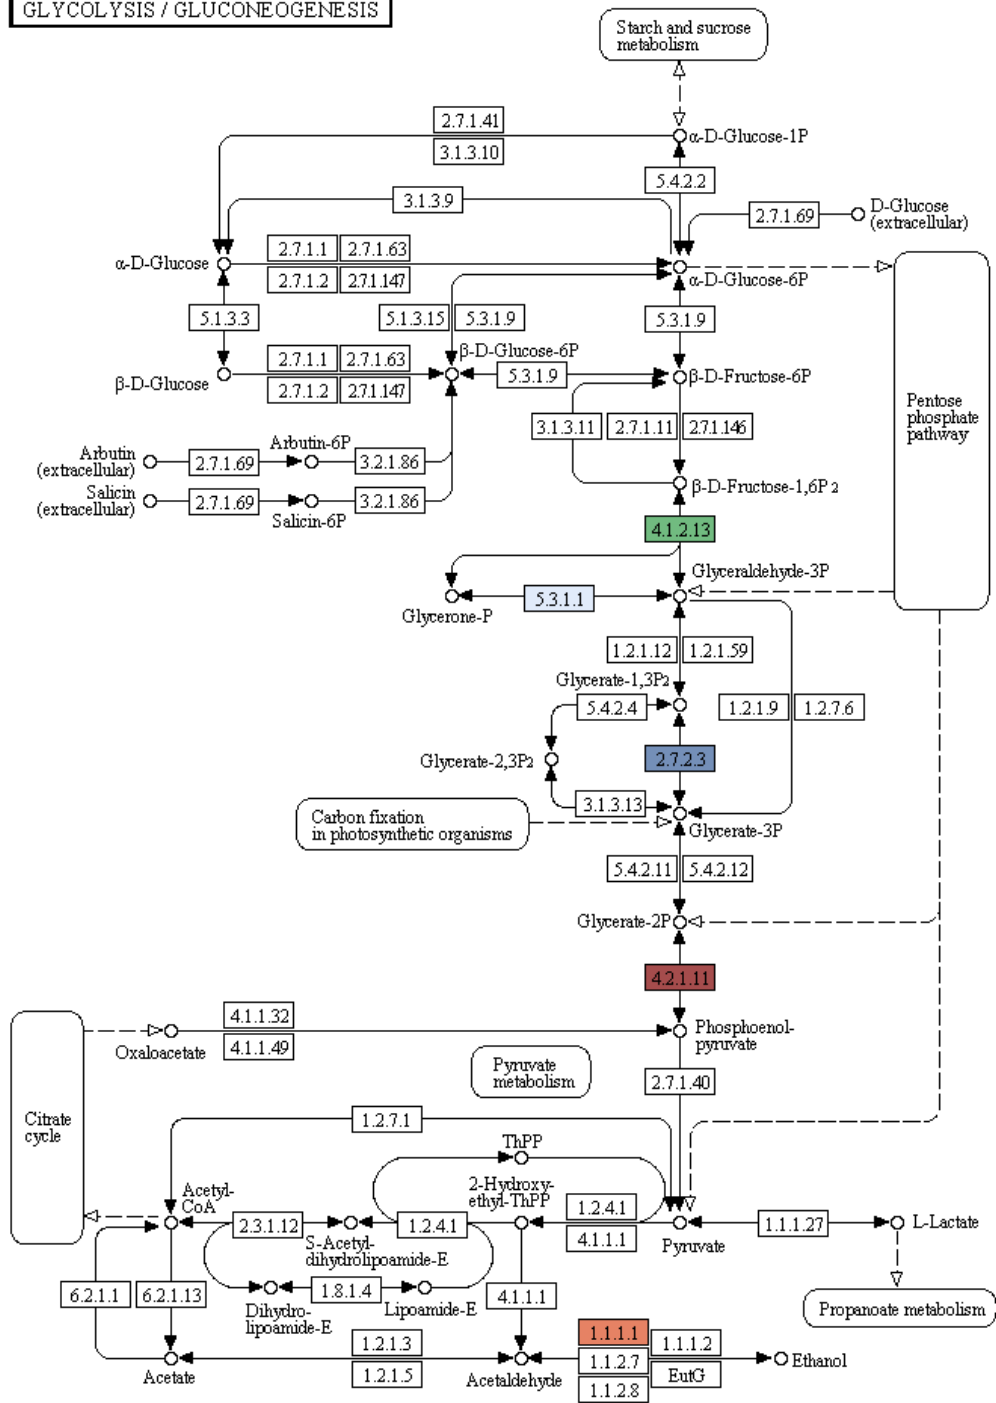

00010 2/18/14  
 (c) Kanehisa Laboratories









**Supplementary Table S1** Information for differential protein spots on 2-DE gels and their corresponding MS identities

| <b>Spot No.<sup>a</sup></b> | <b>Exper.<sup>b</sup><br/><i>pI/Mr</i></b> | <b>M.S.<sup>c</sup><br/>Score</b> | <b>ABV<br/>S1<sup>d</sup></b> | <b>ABV<br/>S2</b> | <b>ABV<br/>S3</b> | <b>ABV<br/>S4</b> | <b>ABV<br/>S5</b> | <b>ABV<br/>S6</b> | <b>ABV<br/>S7</b> | <b>ABV<br/>S8</b> | <b>ABV<br/>S9</b> | <b>Protein<br/>name</b>            |
|-----------------------------|--------------------------------------------|-----------------------------------|-------------------------------|-------------------|-------------------|-------------------|-------------------|-------------------|-------------------|-------------------|-------------------|------------------------------------|
| 1                           | 4.78/49                                    | 92                                | 0.04                          | 0.00              | 0.19              | 0.12              | 0.03              | 0.06              | 0.05              | 0.00              | 0.06              | hypothetical protein               |
| 2                           | 4.93/61                                    | 215                               | 0.06                          | 0.20              | 0.49              | 0.38              | 0.23              | 0.22              | 0.16              | 0.12              | 0.27              | Chaperonin 60 subunit alpha 1      |
| 3                           | 4.99/54                                    | 97                                | 0.13                          | 0.18              | 0.35              | 0.17              | 0.00              | 0.16              | 0.13              | 0.10              | 0.22              | V-type proton ATPase subunit B1    |
| 4                           | 5.14/54                                    | 187                               | 0.07                          | 0.10              | 0.21              | 0.13              | 0.16              | 0.15              | 0.08              | 0.00              | 0.13              | V-type proton ATPase subunit B2    |
| 5                           | 5.15/51                                    | 101                               | 0.00                          | 0.23              | 0.31              | 0.24              | 0.29              | 0.22              | 0.10              | 0.00              | 0.00              | Tubulin alpha-6 chain              |
| 6                           | 5.05/47                                    | 154                               | 0.08                          | 0.12              | 0.20              | 0.13              | 0.21              | 0.10              | 0.12              | 0.07              | 0.21              | 26S protease regulatory subunit 6A |
| 7                           | 5.19/70                                    | 115                               | 0.34                          | 0.35              | 0.55              | 0.40              | 0.43              | 0.35              | 0.23              | 0.28              | 0.43              | RNA polymerase II transcription    |
| 8                           | 5.21/70                                    | 98                                | 0.57                          | 0.52              | 1.01              | 0.58              | 0.68              | 0.51              | 0.45              | 0.35              | 0.53              | RNA polymerase II transcription    |
| 9                           | 5.23/70                                    | 128                               | 0.11                          | 0.25              | 0.56              | 0.51              | 0.48              | 0.38              | 0.36              | 0.36              | 0.34              | RNA polymerase II transcription    |
| 10                          | 5.30/67                                    | 127                               | 0.15                          | 0.35              | 0.27              | 0.41              | 0.22              | 0.18              | 0.43              | 0.27              | 0.21              | Actin-7                            |
| 11                          | 5.24/60                                    | 147                               | 0.24                          | 0.30              | 0.31              | 0.22              | 0.22              | 0.19              | 0.17              | 0.16              | 0.15              | Chaperonin 60 subunit beta 2       |
| 12                          | 5.27/60                                    | 73                                | 0.07                          | 0.18              | 0.20              | 0.22              | 0.19              | 0.17              | 0.16              | 0.13              | 0.12              | Chaperonin 60 subunit beta 1       |
| 13                          | 5.28/60                                    | 143                               | 0.30                          | 0.19              | 0.15              | 0.13              | 0.13              | 0.12              | 0.11              | 0.11              | 0.09              | Chaperonin CPN60, mitochondrial    |
| 14                          | 5.18/53                                    | 87                                | 0.04                          | 0.30              | 0.36              | 0.30              | 0.57              | 0.28              | 0.24              | 0.22              | 0.13              | Tubulin alpha-6 chain              |
| 15                          | 5.18/51                                    | 103                               | 0.08                          | 0.52              | 0.92              | 0.59              | 0.78              | 0.62              | 0.38              | 0.29              | 0.15              | Tubulin alpha-6 chain              |
| 16                          | 5.23/53                                    | 89                                | 0.05                          | 0.06              | 0.13              | 0.23              | 0.24              | 0.25              | 0.19              | 0.23              | 0.18              | Tubulin alpha-6 chain              |
| 17                          | 5.31/51                                    | 173                               | 0.19                          | 0.12              | 0.07              | 0.37              | 0.03              | 0.08              | 0.05              | 0.02              | 0.00              | Actin-7                            |
| 18                          | 5.50/52                                    | 190                               | 0.47                          | 0.53              | 0.33              | 0.23              | 0.30              | 0.26              | 0.24              | 0.37              | 0.15              | ATP synthase beta subunit 1        |
| 19                          | 5.78/53                                    | 175                               | 0.52                          | 0.33              | 0.38              | 0.26              | 0.46              | 0.60              | 0.43              | 0.75              | 0.34              | ATP synthase subunit beta-3        |
| 20                          | 5.75/49                                    | 182                               | 0.15                          | 0.34              | 0.15              | 0.06              | 0.08              | 0.13              | 0.05              | 0.06              | 0.00              | Glucose adenyltransferase          |
| 21                          | 5.80/42                                    | 101                               | 0.55                          | 0.49              | 0.46              | 0.24              | 0.39              | 0.46              | 0.35              | 0.39              | 0.15              | Glutamine synthetase               |
| 22                          | 5.20/44                                    | 96                                | 0.10                          | 0.24              | 0.28              | 0.22              | 0.39              | 0.22              | 0.25              | 0.09              | 0.11              | Actin-7                            |
| 23                          | 5.26/44                                    | 93                                | 0.14                          | 0.25              | 0.23              | 0.30              | 0.37              | 0.31              | 0.22              | 0.20              | 0.25              | Actin-7                            |
| 24                          | 5.31/44                                    | 195                               | 0.34                          | 1.32              | 1.15              | 1.40              | 1.71              | 1.33              | 1.38              | 1.78              | 1.32              | Actin-7                            |
| 25                          | 5.28/42                                    | 128                               | 0.23                          | 0.26              | 0.27              | 0.35              | 0.31              | 0.21              | 0.23              | 0.12              | 0.28              | Succinyl-CoA ligase                |
| 26                          | 5.29/42                                    | 107                               | 0.26                          | 0.26              | 0.39              | 0.34              | 0.30              | 0.16              | 0.18              | 0.26              | 0.17              | Glutamine synthetase               |
| 27                          | 5.30/40                                    | [113]                             | 0.27                          | 0.35              | 0.18              | 0.13              | 0.16              | 0.13              | 0.13              | 0.12              | 0.12              | Adenosine kinase 1                 |
| 28                          | 5.01/79                                    | 127                               | 0.09                          | 0.36              | 0.60              | 0.57              | 0.47              | 0.32              | 0.30              | 0.24              | 0.74              | Heat shock protein 90-3            |
| 29                          | 5.54/96                                    | 81                                | 0.00                          | 0.00              | 0.00              | 0.03              | 0.04              | 0.13              | 0.10              | 0.10              | 0.12              | Alpha-glucan phosphorylase 1       |
| 30                          | 5.60/96                                    | [387]                             | 0.00                          | 0.03              | 0.04              | 0.07              | 0.08              | 0.16              | 0.20              | 0.12              | 0.19              | Alpha-glucan phosphorylase 1       |
| 31                          | 5.60/96                                    | 76                                | 0.00                          | 0.03              | 0.03              | 0.04              | 0.04              | 0.13              | 0.11              | 0.10              | 0.07              | Alpha-glucan phosphorylase 1       |
| 32                          | 5.59/102                                   | [110]                             | 0.00                          | 0.02              | 0.00              | 0.00              | 0.00              | 0.00              | 0.00              | 0.12              | 0.00              | Alpha-glucan phosphorylase 1       |
| 33                          | 5.73/102                                   | 101                               | 0.00                          | 0.05              | 0.00              | 0.00              | 0.00              | 0.00              | 0.01              | 0.15              | 0.02              | Alpha-glucan phosphorylase 1       |
| 34                          | 4.62/29                                    | 115                               | 0.35                          | 0.27              | 0.55              | 0.48              | 0.38              | 0.18              | 0.24              | 0.25              | 0.97              | 14-3-3-like protein GF14 omega     |
| 35                          | 4.68/28                                    | 159                               | 0.57                          | 0.12              | 1.08              | 0.79              | 0.56              | 0.25              | 0.32              | 0.36              | 0.88              | 14-3-3-like protein GF14 omega     |
| 36                          | 4.75/29                                    | 111                               | 0.37                          | 0.11              | 1.09              | 0.61              | 0.72              | 0.14              | 0.21              | 0.25              | 0.56              | 14-3-3-like protein GF14 psi       |
| 37                          | 5.16/37                                    | [154]                             | 0.24                          | 0.18              | 0.34              | 0.19              | 0.21              | 0.14              | 0.13              | 0.18              | 0.24              | Probable fructokinase-1            |
| 38                          | 5.18/36                                    | [147]                             | 0.26                          | 0.21              | 0.27              | 0.16              | 0.17              | 0.12              | 0.09              | 0.10              | 0.14              | Probable fructokinase-1            |
| 39                          | 5.21/34                                    | 151                               | 0.65                          | 0.73              | 0.99              | 0.62              | 0.90              | 0.39              | 0.48              | 0.39              | 0.70              | Probable lactoylglutathione lyase  |

|           |         |       |      |      |      |      |      |      |      |      |      |                                          |
|-----------|---------|-------|------|------|------|------|------|------|------|------|------|------------------------------------------|
| <b>40</b> | 5.24/34 | [73]  | 0.19 | 0.17 | 0.29 | 0.29 | 0.28 | 0.12 | 0.13 | 0.12 | 0.16 | Probable lactoylglutathione lyase        |
| <b>41</b> | 5.27/32 | [187] | 0.14 | 0.17 | 0.19 | 0.19 | 0.24 | 0.16 | 0.19 | 0.20 | 0.27 | Carboxyphosphorylase                     |
| <b>42</b> | 5.28/36 | [146] | 0.30 | 0.30 | 0.27 | 0.12 | 0.19 | 0.10 | 0.11 | 0.13 | 0.12 | Probable fructokinase-1                  |
| <b>43</b> | 5.45/37 | [81]  | 0.44 | 0.42 | 0.19 | 0.39 | 0.45 | 0.32 | 0.35 | 0.26 | 0.30 | NADP-dependent reductase P1              |
| <b>44</b> | 5.45/38 | [99]  | 0.32 | 0.37 | 0.47 | 0.41 | 0.49 | 0.33 | 0.46 | 0.45 | 0.34 | NADP-dependent reductase P1              |
| <b>45</b> | 5.31/35 | [151] | 0.13 | 0.15 | 0.14 | 0.14 | 0.17 | 0.13 | 0.15 | 0.19 | 0.15 | DNA-damage-repair protein                |
| <b>46</b> | 5.77/36 | [254] | 0.55 | 0.24 | 0.19 | 0.11 | 0.14 | 0.11 | 0.12 | 0.13 | 0.08 | NAD(P)H oxidoreductase                   |
| <b>47</b> | 5.38/32 | [133] | 0.00 | 0.05 | 0.06 | 0.21 | 0.23 | 0.17 | 0.28 | 0.26 | 0.39 | Thiamine thiazole synthase               |
| <b>48</b> | 5.18/30 | [209] | 0.00 | 0.17 | 0.29 | 0.14 | 0.27 | 0.11 | 0.13 | 0.07 | 0.14 | Alpha-soluble NSF protein 2              |
| <b>49</b> | 5.21/24 | 125   | 0.16 | 0.14 | 0.34 | 0.36 | 0.42 | 0.17 | 0.23 | 0.20 | 0.37 | Ferritin-4, chloroplastic                |
| <b>50</b> | 5.28/23 | [172] | 0.33 | 0.31 | 0.49 | 0.42 | 0.46 | 0.17 | 0.30 | 0.15 | 0.41 | 20 kDa chaperonin, chloroplastic         |
| <b>51</b> | 5.31/27 | 82    | 0.59 | 0.30 | 0.29 | 0.27 | 0.34 | 0.34 | 0.36 | 0.30 | 0.56 | L-ascorbate peroxidase 1                 |
| <b>52</b> | 5.55/28 | 133   | 1.79 | 1.21 | 2.47 | 1.99 | 3.21 | 2.10 | 1.51 | 2.58 | 3.37 | L-ascorbate peroxidase 1                 |
| <b>53</b> | 5.71/28 | [96]  | 0.66 | 0.48 | 0.45 | 0.31 | 0.45 | 0.13 | 0.17 | 0.10 | 0.22 | Actin-7                                  |
| <b>54</b> | 4.85/21 | 113   | 0.45 | 0.20 | 0.39 | 0.21 | 0.28 | 0.17 | 0.21 | 0.11 | 0.45 | ATP synthase subunit d                   |
| <b>55</b> | 5.15/19 | 184   | 0.32 | 0.18 | 0.31 | 0.15 | 0.25 | 0.13 | 0.12 | 0.08 | 0.17 | ATP synthase subunit d                   |
| <b>56</b> | 5.60/22 | [137] | 0.38 | 0.20 | 0.15 | 0.10 | 0.15 | 0.11 | 0.10 | 0.12 | 0.09 | Proteasome subunit beta type             |
| <b>57</b> | 5.25/17 | [133] | 0.19 | 0.31 | 0.42 | 0.35 | 0.42 | 0.20 | 0.27 | 0.21 | 0.26 | regulator of ribonuclease                |
| <b>58</b> | 5.60/17 | [66]  | 0.00 | 0.08 | 0.17 | 0.52 | 0.57 | 0.38 | 0.47 | 0.32 | 0.63 | Eukaryotic translation initiation factor |
| <b>59</b> | 5.60/17 | 72    | 0.00 | 0.05 | 0.10 | 0.25 | 0.24 | 0.15 | 0.19 | 0.15 | 0.24 | Eukaryotic translation initiation factor |
| <b>60</b> | 5.78/16 | [196] | 0.13 | 0.18 | 0.16 | 0.45 | 0.35 | 0.55 | 0.49 | 0.48 | 0.32 | heat-shock protein, putative             |
| <b>61</b> | 5.94/17 | [112] | 0.13 | 0.19 | 0.19 | 0.16 | 0.19 | 0.15 | 0.16 | 0.17 | 0.12 | Actin-depolymerizing factor 3            |
| <b>62</b> | 5.99/18 | [95]  | 0.54 | 0.98 | 1.38 | 0.79 | 1.71 | 0.58 | 0.89 | 0.62 | 0.36 | class I heat shock protein               |
| <b>63</b> | 5.98/17 | 82    | 0.30 | 0.40 | 0.55 | 0.32 | 0.72 | 0.21 | 0.25 | 0.25 | 0.09 | Eukaryotic translation initiation factor |
| <b>64</b> | 6.17/18 | [180] | 0.69 | 1.23 | 1.26 | 1.03 | 1.26 | 0.60 | 1.11 | 0.60 | 0.54 | Peroxiredoxin-2B                         |
| <b>65</b> | 6.39/18 | [164] | 0.00 | 1.99 | 3.73 | 4.73 | 4.30 | 3.85 | 4.45 | 3.87 | 3.40 | class I heat shock protein               |
| <b>66</b> | 6.60/15 | [80]  | 0.45 | 0.36 | 0.32 | 0.16 | 0.19 | 0.25 | 0.32 | 0.20 | 0.00 | Superoxide dismutase [Cu-Zn] 1           |
| <b>67</b> | 6.60/16 | [147] | 0.15 | 0.45 | 0.52 | 0.33 | 0.32 | 0.35 | 0.40 | 0.36 | 0.13 | Actin-depolymerizing factor 3            |
| <b>68</b> | 6.84/17 | 119   | 0.34 | 0.41 | 0.28 | 0.18 | 0.20 | 0.21 | 0.14 | 0.22 | 0.10 | Ubiquitin-conjugating enzyme E2          |
| <b>69</b> | 7.03/16 | [195] | 0.00 | 0.56 | 0.66 | 0.38 | 0.68 | 0.69 | 0.21 | 0.57 | 0.14 | AT3g53990/F5K20_290                      |
| <b>70</b> | 6.61/22 | 139   | 1.03 | 0.68 | 0.45 | 0.28 | 0.39 | 0.38 | 0.41 | 0.34 | 0.17 | Superoxide dismutase [Mn] 1              |
| <b>71</b> | 6.60/23 | [99]  | 0.31 | 0.13 | 0.15 | 0.10 | 0.15 | 0.12 | 0.13 | 0.17 | 0.05 | Proteasome subunit alpha type-2-A        |
| <b>72</b> | 6.01/24 | [94]  | 0.29 | 0.11 | 0.12 | 0.12 | 0.14 | 0.14 | 0.11 | 0.12 | 0.08 | Superoxide dismutase [Fe] 2              |
| <b>73</b> | 6.55/26 | [234] | 0.35 | 0.32 | 0.26 | 0.13 | 0.22 | 0.21 | 0.20 | 0.22 | 0.20 | L-ascorbate peroxidase 1                 |
| <b>74</b> | 6.59/26 | [194] | 0.45 | 0.47 | 0.33 | 0.21 | 0.28 | 0.38 | 0.39 | 0.42 | 0.00 | Triosephosphate isomerase                |
| <b>75</b> | 6.81/28 | 131   | 0.29 | 0.29 | 0.24 | 0.15 | 0.16 | 0.18 | 0.11 | 0.21 | 0.00 | Proteasome subunit alpha type-6-A        |
| <b>76</b> | 5.86/32 | [162] | 0.00 | 0.04 | 0.09 | 0.14 | 0.20 | 0.21 | 0.22 | 0.27 | 0.16 | Thiamine thiazole synthase               |
| <b>77</b> | 6.22/32 | 88    | 0.00 | 0.02 | 0.05 | 0.27 | 0.26 | 0.36 | 0.43 | 0.70 | 0.18 | Thiamine thiazole synthase               |
| <b>78</b> | 6.10/48 | 119   | 0.26 | 0.44 | 0.32 | 0.14 | 0.21 | 0.15 | 0.11 | 0.13 | 0.06 | S-adenosylmethionine synthase 1          |
| <b>79</b> | 6.64/39 | 108   | 0.89 | 0.46 | 0.28 | 0.17 | 0.24 | 0.34 | 0.29 | 0.35 | 0.10 | malate dehydrogenase                     |
| <b>80</b> | 6.44/46 | 163   | 0.06 | 0.09 | 0.07 | 0.06 | 0.06 | 0.13 | 0.11 | 0.16 | 0.03 | UDP-D-apiose/-xylose synthase 1          |
| <b>81</b> | 6.49/45 | 115   | 0.07 | 0.12 | 0.08 | 0.06 | 0.07 | 0.12 | 0.09 | 0.13 | 0.04 | Cytosolic isocitrate dehydrogenase       |
| <b>82</b> | 6.58/47 | 76    | 0.17 | 0.27 | 0.13 | 0.07 | 0.10 | 0.16 | 0.08 | 0.10 | 0.05 | GDP-mannose 3,5-epimerase                |

|            |          |       |      |      |      |      |      |      |      |      |      |                                  |
|------------|----------|-------|------|------|------|------|------|------|------|------|------|----------------------------------|
| <b>83</b>  | 6.24/54  | 124   | 0.13 | 0.30 | 0.31 | 0.18 | 0.19 | 0.26 | 0.28 | 0.39 | 0.11 | Bifunctional enolase 2           |
| <b>84</b>  | 6.21/52  | 100   | 0.00 | 0.20 | 0.21 | 0.12 | 0.14 | 0.22 | 0.14 | 0.27 | 0.13 | Bifunctional enolase 2           |
| <b>85</b>  | 6.32/55  | 151   | 0.25 | 0.31 | 0.09 | 0.20 | 0.21 | 0.32 | 0.26 | 0.33 | 0.10 | ATP synthase F1 subunit 1        |
| <b>86</b>  | 6.45/64  | 177   | 0.08 | 0.11 | 0.10 | 0.10 | 0.14 | 0.18 | 0.20 | 0.19 | 0.08 | malic enzyme, putative           |
| <b>87</b>  | 6.43/54  | [150] | 0.09 | 0.33 | 0.29 | 0.16 | 0.18 | 0.40 | 0.39 | 0.26 | 0.14 | Bifunctional enolase 2           |
| <b>88</b>  | 6.41/52  | 160   | 0.07 | 0.24 | 0.20 | 0.14 | 0.17 | 0.28 | 0.25 | 0.25 | 0.10 | Bifunctional enolase 2           |
| <b>89</b>  | 5.45/69  | 234   | 0.02 | 0.04 | 0.04 | 0.01 | 0.01 | 0.04 | 0.02 | 0.04 | 0.01 | V-type proton ATPase             |
| <b>90</b>  | 5.55/69  | 194   | 0.07 | 0.07 | 0.12 | 0.06 | 0.06 | 0.06 | 0.04 | 0.11 | 0.04 | V-type proton ATPase             |
| <b>91</b>  | 5.60/49  | 81    | 0.02 | 0.07 | 0.15 | 0.06 | 0.06 | 0.06 | 0.08 | 0.86 | 0.06 | Glucose-adenylyltransferase      |
| <b>92</b>  | 6.61/64  | 154   | 0.04 | 0.11 | 0.03 | 0.06 | 0.03 | 0.03 | 0.05 | 0.03 | 0.02 | malic enzyme, putative           |
| <b>93</b>  | 4.52/50  | [114] | 0.47 | 0.13 | 0.27 | 0.18 | 0.17 | 0.17 | 0.14 | 0.04 | 0.09 | Triosephosphate isomerase        |
| <b>94</b>  | 5.72/101 | [278] | 0.05 | 0.09 | 0.17 | 0.08 | 0.09 | 0.20 | 0.20 | 0.14 | 0.15 | Alpha-glucan phosphorylase 1     |
| <b>95</b>  | 5.05/33  | [108] | 0.12 | 0.34 | 1.36 | 1.08 | 1.21 | 0.45 | 0.38 | 0.32 | 1.02 | Actin-7                          |
| <b>96</b>  | 4.93/33  | [77]  | 0.13 | 0.09 | 0.48 | 0.53 | 0.87 | 0.15 | 0.07 | 0.07 | 0.19 | Actin-7                          |
| <b>97</b>  | 5.32/35  | [165] | 0.71 | 0.33 | 0.17 | 0.17 | 0.17 | 0.09 | 0.13 | 0.11 | 0.07 | nitrile-specifier protein 5-like |
| <b>98</b>  | 5.53/28  | [190] | 0.09 | 0.07 | 0.15 | 0.14 | 0.22 | 0.10 | 0.19 | 0.09 | 0.27 | Abscisic acid receptor PYR1      |
| <b>99</b>  | 5.18/24  | [210] | 0.21 | 0.22 | 0.35 | 0.25 | 0.35 | 0.18 | 0.18 | 0.12 | 0.36 | Triosephosphate isomerase        |
| <b>100</b> | 5.28/26  | [161] | 0.61 | 0.41 | 0.35 | 0.30 | 0.30 | 0.15 | 0.16 | 0.16 | 0.16 | Dienelactone hydrolase           |
| <b>101</b> | 5.51/23  | [67]  | 0.18 | 0.25 | 0.23 | 0.20 | 0.23 | 0.07 | 0.07 | 0.06 | 0.06 | UMP-CMP kinase 3                 |
| <b>102</b> | 5.31/25  | [189] | 0.37 | 0.38 | 0.07 | 0.11 | 0.00 | 0.05 | 0.06 | 0.05 | 0.00 | Actin-7                          |
| <b>103</b> | 5.50/22  | [158] | 0.41 | 0.29 | 0.25 | 0.22 | 0.28 | 0.15 | 0.13 | 0.18 | 0.17 | Proteasome subunit type-3        |
| <b>104</b> | 5.62/18  | [61]  | 0.37 | 0.38 | 0.35 | 0.46 | 0.78 | 0.41 | 0.50 | 0.43 | 0.56 | Superoxide dismutase [Cu-Zn] 1   |
| <b>105</b> | 6.25/17  | [142] | 0.00 | 0.47 | 0.77 | 0.59 | 0.53 | 0.27 | 0.39 | 0.21 | 0.00 | class I heat shock protein       |
| <b>106</b> | 6.36/16  | [130] | 0.31 | 0.19 | 0.23 | 0.18 | 0.13 | 0.11 | 0.12 | 0.10 | 0.00 | Superoxide dismutase [Cu-Zn] 1   |
| <b>107</b> | 6.95/27  | [257] | 0.39 | 0.40 | 0.31 | 0.35 | 0.40 | 0.22 | 0.06 | 0.09 | 1.59 | glutathione S-transferase GST    |
| <b>108</b> | 5.56/24  | [166] | 0.22 | 0.10 | 0.12 | 0.09 | 0.11 | 0.11 | 0.14 | 0.15 | 0.05 | Triosephosphate isomerase        |
| <b>109</b> | 5.86/25  | [77]  | 0.15 | 0.35 | 0.26 | 0.18 | 0.19 | 0.19 | 0.25 | 0.16 | 0.12 | 6-phosphogluconolactonase        |
| <b>110</b> | 6.25/26  | [298] | 0.43 | 0.42 | 0.37 | 0.23 | 0.23 | 0.40 | 0.36 | 0.42 | 0.13 | Triosephosphate isomerase        |
| <b>111</b> | 6.87/37  | [298] | 0.24 | 0.54 | 1.10 | 0.14 | 0.99 | 0.58 | 0.26 | 0.53 | 0.29 | annexin                          |
| <b>112</b> | 6.23/41  | [343] | 0.14 | 0.69 | 0.76 | 0.39 | 0.58 | 0.93 | 0.78 | 0.95 | 0.30 | alcohol dehydrogenase            |
| <b>113</b> | 5.63/41  | [440] | 0.00 | 0.08 | 0.20 | 0.17 | 0.16 | 0.44 | 0.26 | 0.47 | 0.15 | Actin-7                          |
| <b>114</b> | 6.65/38  | [349] | 1.05 | 0.72 | 0.68 | 0.37 | 0.33 | 0.66 | 0.31 | 0.76 | 0.23 | Malate dehydrogenase             |
| <b>115</b> | 6.23/53  | [399] | 0.20 | 0.31 | 0.22 | 0.34 | 0.33 | 0.41 | 0.48 | 0.39 | 0.19 | Leucine aminopeptidase 3         |
| <b>116</b> | 6.35/52  | [173] | 0.21 | 0.18 | 0.18 | 0.15 | 0.19 | 0.42 | 0.48 | 0.31 | 0.27 | Bifunctional enolase 2           |
| <b>117</b> | 5.65/58  | [345] | 0.12 | 0.32 | 0.21 | 0.26 | 0.38 | 0.42 | 0.32 | 0.36 | 0.21 | Betaine aldehyde dehydrogenase 1 |
| <b>118</b> | 5.84/57  | [214] | 0.12 | 0.24 | 0.19 | 0.32 | 0.33 | 0.32 | 0.21 | 0.13 | 0.13 | Ketol-acid reductoisomerase      |

**Note:** <sup>a</sup>Assigned spot number (S1-S118) for the 118 differential proteins as indicated in Fig. 2.

<sup>b</sup>The experimental values for the mass (kDa) and pI of identified proteins.

<sup>c</sup>Mascot searched scores (M.S.) against cassava genome for MS and [MS/MS] searched results.

<sup>d</sup>The average abundance of the statistical percent of volue (ABV) value (Vol%) in 2-DE gels for protein spots in different development stages (S1-S9) of cassava roots produced by ImageMaster.



**Supplementary Table S1-continued** Detai information for the hierarchical cluster of abundance volume% of the protein spots in Figure 5A was presented in the following. The high- or low-abundance proteins were indicated in red or green, respectively.

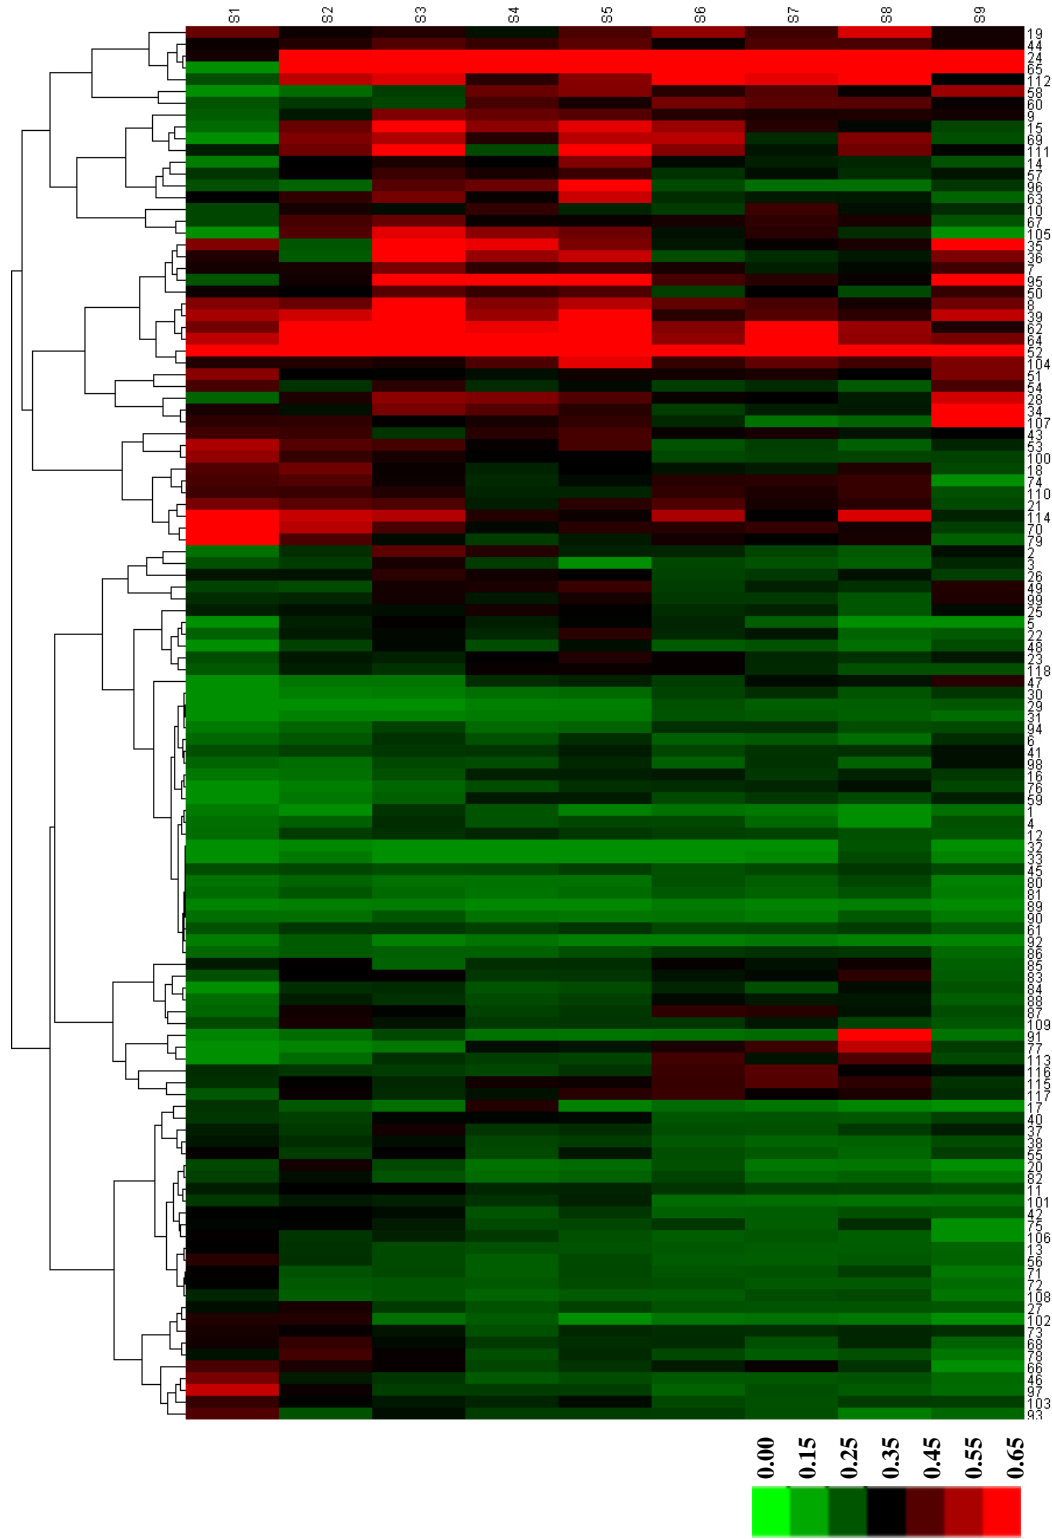

**Supplementary Table S1-continued** Detai information for the hierarchical cluster of the relative abundance volume ratios for the protein spots with S3 on 2-DE gels in Figure 5B was highlighted. The log values for the induced or reduced relative abundance volume ratios were indicated in red or green, respectively.

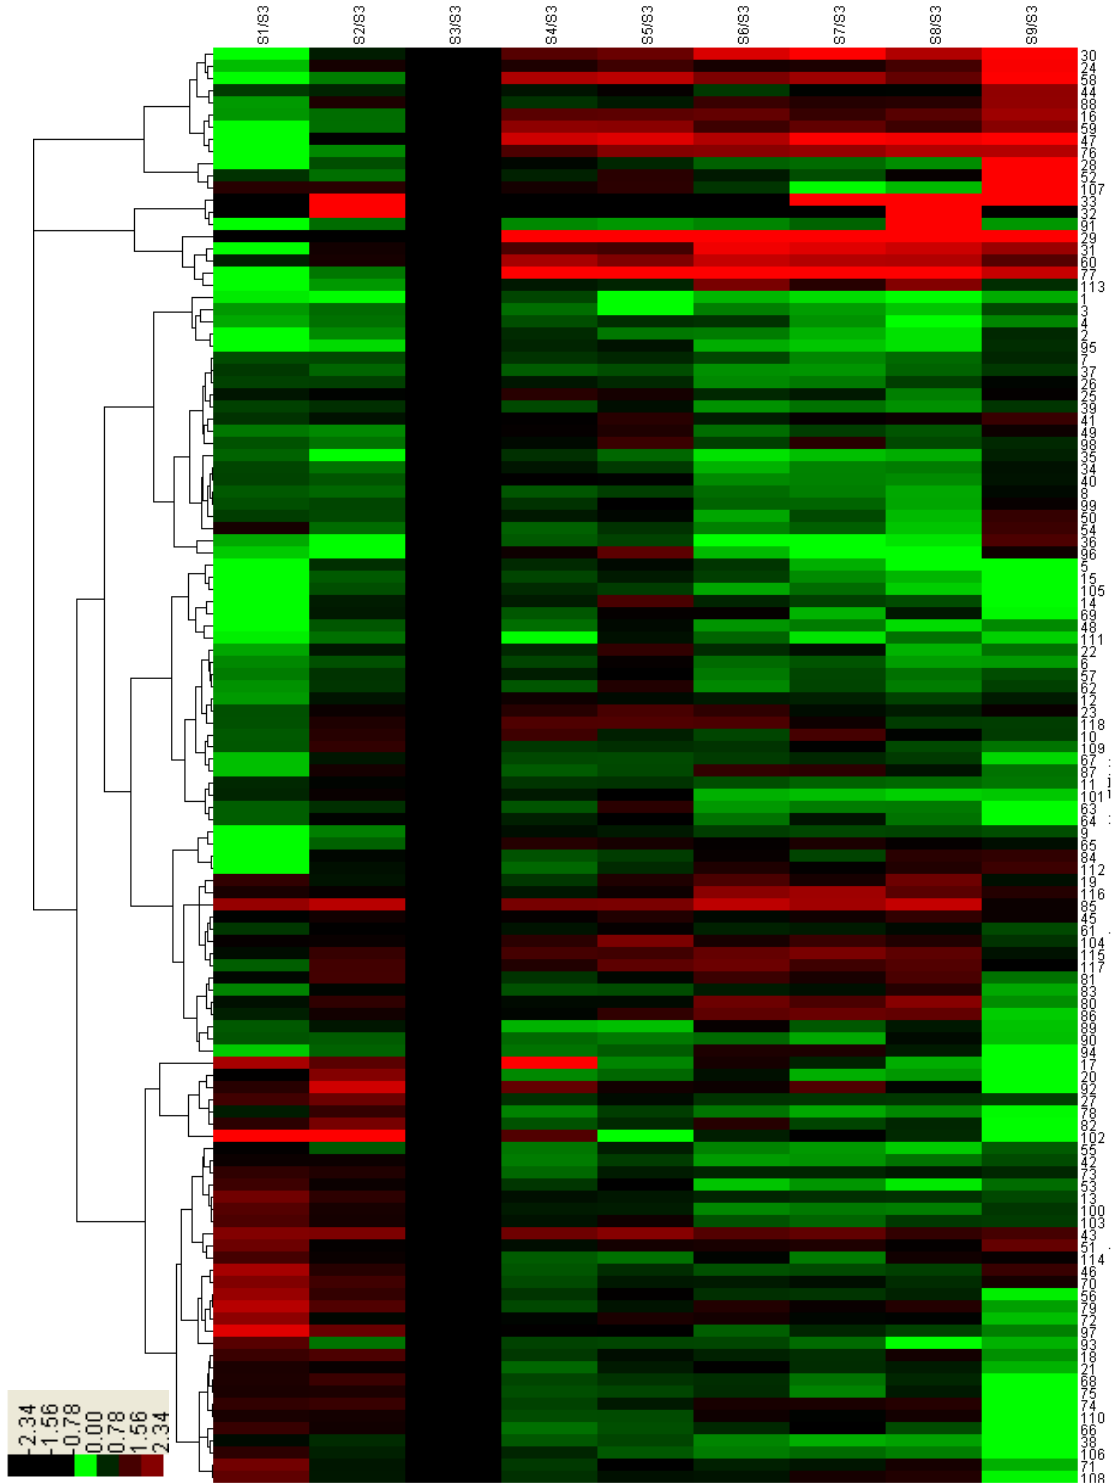

**Supplementary Table S2.** Information for differential proteins on 2-D DIGE gels and the corresponding MS identities.

| <b>Spot No.<sup>a</sup></b> | <b>Exper.<sup>b</sup><br/><i>pI/Mr</i></b> | <b>Ther.<sup>c</sup><br/><i>pI/Mr</i></b> | <b>MP/<br/>TP<sup>d</sup></b> | <b>SC<sup>e</sup><br/>(%)</b> | <b>M.S.<sup>f</sup><br/>Score</b> | <b>Av. R.<sup>g</sup><br/>S4/S3</b> | <b>Av. R.<br/>S5/S3</b> | <b>Av. R.<br/>S5/S4</b> | <b>Protein<br/>name</b>                  |
|-----------------------------|--------------------------------------------|-------------------------------------------|-------------------------------|-------------------------------|-----------------------------------|-------------------------------------|-------------------------|-------------------------|------------------------------------------|
| 2                           | 5.34/62.3                                  | 4.93/61                                   | 29/64                         | 47                            | 215                               | 1.53                                | 1.19                    | -1.12                   | Chaperonin 60 subunit alpha 1            |
| 5                           | 4.95/48.3                                  | 5.15/51                                   | 15/65                         | 51                            | 101                               | 2.42                                | 3.63                    | 1.55                    | Tubulin alpha-6 chain                    |
| 6                           | 4.99/47.7                                  | 5.05/47                                   | 29/93                         | 59                            | 154                               | -1.56                               | -1.26                   | -1.55                   | 26S protease regulatory subunit 6A       |
| 15                          | 4.95/48.3                                  | 5.18/51                                   | 18/79                         | 48                            | 103                               | 12.27                               | 18.41                   | 1.55                    | Tubulin alpha-6 chain                    |
| 21                          | 6.27/47.5                                  | 5.80/42                                   | 14/54                         | 33                            | 101                               | -1.37                               | -1.54                   | -1.65                   | Glutamine synthetase                     |
| 23                          | 5.31/41.9                                  | 5.26/44                                   | 18/87                         | 52                            | 93                                | 1.53                                | 1.55                    | 1.61                    | Actin-7                                  |
| 27                          | 5.38/38.1                                  | 5.30/40                                   | [2]                           | [7]                           | [113]                             | -1.21                               | -1.24                   | -1.58                   | Adenosine kinase 1                       |
| 28                          | 4.99/80.3                                  | 5.01/79                                   | 33/77                         | 37                            | 127                               | 2.62                                | 2.55                    | -1.53                   | Heat shock protein 90-3                  |
| 29                          | 8.50/81.9                                  | 5.54/96                                   | 24/95                         | 24                            | 81                                | 1.73                                | 1.63                    | -1.56                   | Alpha-glucan phosphorylase 1             |
| 30                          | 8.5/81.9                                   | 5.60/96                                   | [7]                           | [12]                          | [387]                             | 1.75                                | 1.59                    | -1.13                   | Alpha-glucan phosphorylase 1             |
| 31                          | 6.71/80.6                                  | 5.60/96                                   | 16/58                         | 32                            | 76                                | 1.56                                | 1.02                    | -1.53                   | Alpha-glucan phosphorylase 1             |
| 34                          | 4.77/29.4                                  | 4.62/29                                   | 16/46                         | 44                            | 115                               | -1.63                               | 1.05                    | -1.57                   | 14-3-3-like protein GF14 omega           |
| 35                          | 4.76/29.5                                  | 4.68/28                                   | 21/56                         | 54                            | 159                               | -1.76                               | -1.11                   | -1.59                   | 14-3-3-like protein GF14 omega           |
| 36                          | 4.75/29.9                                  | 4.75/29                                   | 16/67                         | 60                            | 111                               | -1.36                               | -1.12                   | -1.56                   | 14-3-3-like protein GF14 psi             |
| 39                          | 5.17/32.8                                  | 5.21/34                                   | 19/77                         | 55                            | 151                               | 1.30                                | 1.18                    | -1.53                   | Probable lactoylglutathione lyase        |
| 40                          | 5.17/32.8                                  | 5.24/34                                   | [2]                           | [7]                           | [73]                              | 1.30                                | 1.08                    | -1.58                   | Probable lactoylglutathione lyase        |
| 42                          | 5.29/35.5                                  | 5.28/36                                   | [3]                           | [11]                          | [146]                             | -1.22                               | -1.10                   | -1.87                   | Probable fructokinase-1                  |
| 44                          | 5.41/38.8                                  | 5.45/38                                   | [2]                           | [7]                           | [99]                              | 1.28                                | 1.22                    | 1.54                    | NADP-dependent reductase                 |
| 46                          | 5.47/33.9                                  | 5.77/36                                   | [3]                           | [15]                          | [254]                             | -1.54                               | -1.33                   | -1.56                   | NAD(P)H oxidoreductase                   |
| 47                          | 6.07/37.6                                  | 5.38/32                                   | [2]                           | [8]                           | [133]                             | 3.53                                | 2.78                    | -1.25                   | Thiamine thiazole synthase               |
| 49                          | 5.30/29.5                                  | 5.21/24                                   | 18/68                         | 61                            | 125                               | -1.55                               | -1.28                   | 1.23                    | Ferritin-4, chloroplastic                |
| 50                          | 7.79/26.7                                  | 5.28/23                                   | [3]                           | [21]                          | [172]                             | 1.23                                | 1.02                    | -1.56                   | 20 kDa chaperonin, chloroplastic         |
| 51                          | 5.31/27.8                                  | 5.31/27                                   | 13/78                         | 40                            | 82                                | 1.57                                | 1.00                    | 1.53                    | L-ascorbate peroxidase 1                 |
| 53                          | 5.31/41.9                                  | 5.71/28                                   | [2]                           | [7]                           | [96]                              | 1.58                                | -1.09                   | 1.52                    | Actin-7                                  |
| 57                          | 5.61/18.3                                  | 5.25/17                                   | [2]                           | [16]                          | [133]                             | 1.59                                | 1.15                    | -1.63                   | regulator of ribonuclease                |
| 58                          | 5.60/17.7                                  | 5.60/17                                   | [2]                           | [18]                          | [66]                              | 2.12                                | 1.32                    | -1.55                   | Eukaryotic translation initiation factor |
| 61                          | 6.60/16.3                                  | 5.94/17                                   | [2]                           | [11]                          | [112]                             | 2.65                                | 1.35                    | -1.92                   | Actin-depolymerizing factor 3            |
| 64                          | 5.7/17.4                                   | 6.17/18                                   | [10]                          | [22]                          | [180]                             | 1.85                                | 1.03                    | -1.63                   | Peroxiredoxin-2B                         |
| 65                          | 7.93/18.8                                  | 6.39/18                                   | [5]                           | [25]                          | [164]                             | 3.11                                | 1.33                    | -1.56                   | 18.1 kDa class I heat shock protein      |
| 68                          | 5.73/17.2                                  | 6.84/17                                   | 12/37                         | 72                            | 119                               | -1.62                               | -1.54                   | -1.56                   | Ubiquitin-conjugating enzyme E2          |
| 69                          | 6.14/18.0                                  | 7.03/16                                   | [3]                           | [21]                          | [195]                             | -1.51                               | -1.09                   | -1.64                   | AT3g53990/F5K20_290                      |
| 71                          | 6.13/29.8                                  | 6.60/23                                   | [2]                           | [8]                           | [99]                              | -2.58                               | -1.34                   | 1.96                    | Proteasome subunit alpha type-2-A        |
| 77                          | 7.10/36.9                                  | 6.22/32                                   | 17/70                         | 38                            | 88                                | 7.84                                | 4.62                    | -2.23                   | Thiamine thiazole synthase               |
| 78                          | 5.68/43.7                                  | 6.10/48                                   | 16/54                         | 55                            | 119                               | -2.18                               | -2.11                   | 1.06                    | S-adenosylmethionine synthase 1          |
| 79                          | 6.09/36.2                                  | 6.64/39                                   | 18/67                         | 54                            | 119                               | 1.62                                | -1.02                   | 1.58                    | malate dehydrogenase                     |
| 86                          | 6.03/65.3                                  | 6.45/64                                   | 35/90                         | 47                            | 200                               | 1.51                                | 1.54                    | 1.03                    | malic enzyme, putative                   |
| 88                          | 5.86/47.9                                  | 6.41/52                                   | 25/78                         | 62                            | 160                               | 1.43                                | 1.14                    | -1.67                   | Bifunctional enolase 2                   |
| 89                          | 5.29/69                                    | 5.45/69                                   | 41/95                         | 61                            | 234                               | 1.78                                | 1.08                    | 1.23                    | V-type proton ATPase subunit A           |
| 92                          | 6.03/65.3                                  | 6.61/64                                   | 28/71                         | 37                            | 174                               | 1.52                                | 1.53                    | 1.12                    | malic enzyme, putative                   |

|            |           |          |     |      |       |       |       |       |                                      |
|------------|-----------|----------|-----|------|-------|-------|-------|-------|--------------------------------------|
| <b>94</b>  | 8.50/81.9 | 5.72/101 | [7] | [12] | [278] | 1.62  | 1.18  | -1.54 | Alpha-glucan phosphorylase 1         |
| <b>97</b>  | 5.49/35.8 | 5.32/35  | [7] | [24] | [165] | 1.51  | -1.10 | -1.59 | nitrile-specifier protein 5-like     |
| <b>105</b> | 7.93/18.8 | 6.25/17  | [5] | [23] | [142] | 1.51  | -1.21 | -1.80 | 18.1 kDa class I heat shock protein  |
| <b>113</b> | 5.31/41.9 | 5.63/41  | [9] | [36] | [440] | 1.56  | 1.17  | 1.51  | Actin-7                              |
| <b>118</b> | 5.50/58.5 | 5.84/57  | [4] | [9]  | [214] | 1.53  | 1.20  | -1.58 | Ketol-acid reductoisomerase          |
| <b>130</b> | 5.86/95.0 | 6.71/83  | [7] | [10] | [184] | 1.59  | 1.14  | -1.66 | At1g56070/T6H22_13                   |
| <b>131</b> | 4.99/80.2 | 5.12/85  | [4] | [7]  | [181] | 1.69  | 1.64  | 1.56  | Heat shock protein 90-3              |
| <b>132</b> | 5.20/75.3 | 4.46/73  | [9] | [16] | [516] | 1.70  | 1.19  | -1.61 | Heat shock 70 kDa protein 7          |
| <b>133</b> | 5.24/75.5 | 4.48/73  | [7] | [12] | [386] | 1.59  | 1.21  | -1.59 | Heat shock 70 kDa protein 7          |
| <b>134</b> | 4.99/59.3 | 4.85/72  | [6] | [14] | [305] | 1.56  | 1.15  | -1.55 | Putative S9 Tyrosyl aminopeptidase   |
| <b>135</b> | 6.31/80.9 | 6.05/68  | [2] | [7]  | [78]  | 1.62  | 1.04  | 1.53  | Transketolase-2, chloroplastic       |
| <b>136</b> | 4.91/54.5 | 4.78/52  | [2] | [8]  | [78]  | -1.54 | -1.12 | -1.61 | V-type proton ATPase subunit B3      |
| <b>137</b> | 4.77/50.7 | 5.05/47  | [5] | [11] | [193] | -1.53 | -1.04 | -1.66 | Tubulin beta-6 chain                 |
| <b>138</b> | 5.30/59.7 | 5.56/63  | [4] | [13] | [195] | 1.52  | 1.20  | 0.92  | Importin subunit alpha-1             |
| <b>139</b> | 4.68/50.7 | 4.78/51  | [4] | [10] | [170] | 2.98  | 3.42  | 1.15  | Tubulin beta-6 chain                 |
| <b>140</b> | 5.86/53.9 | 6.35/52  | [4] | [10] | [65]  | -1.51 | -1.64 | 1.02  | Adenosylhomocysteinase 1             |
| <b>141</b> | 5.70/51.9 | 6.34/53  | [3] | [7]  | [153] | 1.57  | 1.18  | 0.86  | ribulose carboxylase-oxygenase       |
| <b>142</b> | 6.19/48.5 | 6.65/44  | [4] | [10] | [94]  | -1.63 | -1.09 | 0.89  | Aldolase-type family protein         |
| <b>143</b> | 6.02/38.3 | 6.45/45  | [5] | [20] | [152] | -1.53 | -1.64 | 1.01  | Alcohol dehydrogenase class-P        |
| <b>144</b> | 5.50/26.4 | 5.35/45  | [2] | [6]  | [61]  | 1.54  | 1.15  | 0.93  | acetylmithine deacetylase-like       |
| <b>145</b> | 5.64/42.2 | 5.11/37  | [2] | [6]  | [115] | -1.65 | -1.79 | 1.29  | Actin-7                              |
| <b>146</b> | 5.82/41.6 | 5.71/41  | [2] | [8]  | [73]  | -1.65 | -1.02 | -1.53 | UDP-arabinopyranose mutase 3         |
| <b>147</b> | 8.26/50.4 | 4.89/41  | [4] | [9]  | [103] | 1.67  | 1.22  | 1.51  | Phosphoglycerate kinase 1            |
| <b>148</b> | 8.63/43.1 | 6.68/40  | [7] | [20] | [380] | 1.61  | 1.06  | 1.52  | fructose-bisphosphate aldolase 3     |
| <b>149</b> | 8.93/24.6 | 6.76/38  | [4] | [15] | [118] | -4.15 | -2.33 | 1.81  | fructose-bisphosphate aldolase       |
| <b>150</b> | 7.72/15.2 | 6.36/39  | [2] | [10] | [69]  | 1.70  | -1.10 | -1.66 | aldo/keto reductase AKR              |
| <b>151</b> | 5.12/35.6 | 5.11/34  | [4] | [16] | [110] | 1.58  | 1.05  | 1.62  | Probable fructokinase-1              |
| <b>152</b> | 4.75/34.9 | 4.63/33  | [3] | [14] | [125] | 1.92  | 1.16  | -1.62 | late embryogenesis abundant proteins |
| <b>153</b> | 5.31/41.9 | 5.28/25  | [3] | [7]  | [62]  | 1.54  | 1.06  | -1.61 | Actin-7                              |
| <b>154</b> | 4.93/30.9 | 4.88/28  | [7] | [37] | [343] | -1.57 | -1.17 | -1.64 | 26S proteasome non-ATPase            |
| <b>155</b> | 5.77/27.7 | 6.32/24  | [2] | [10] | [107] | -1.61 | -1.14 | -1.57 | Triosephosphate isomerase            |
| <b>156</b> | 4.70/26.2 | 4.56/27  | [3] | [10] | [123] | -1.51 | -1.15 | -1.75 | Proteasome subunit alpha type-5      |
| <b>157</b> | 6.42/24.9 | 6.16/23  | [2] | [8]  | [61]  | -1.51 | -1.07 | -1.68 | Proteasome subunit beta type-1       |
| <b>158</b> | 6.52/26.9 | 5.56/30  | [4] | [26] | [292] | -5.22 | -2.39 | 2.23  | 3-isopropylmalate dehydratase        |
| <b>159</b> | 6.17/23.8 | 6.88/23  | [4] | [24] | [192] | -2.57 | -2.64 | 1.03  | glutathione-s-transferase theta      |
| <b>160</b> | 7.66/29.6 | 4.68/25  | [2] | [9]  | [79]  | -1.56 | -1.13 | -1.65 | peroxiredoxin                        |
| <b>161</b> | 5.98/26.2 | 5.21/22  | [2] | [13] | [173] | -1.52 | -1.20 | -1.65 | conserved hypothetical protein       |
| <b>162</b> | 4.95/12.4 | 4.75/15  | [2] | [22] | [88]  | -1.53 | -1.02 | 1.51  | Small ubiquitin-related modifier     |
| <b>163</b> | 4.92/32.1 | 4.98/15  | 8   | 31   | 78    | -5.57 | -1.36 | 4.17  | actin                                |
| <b>164</b> | 6.74/17.3 | 6.76/12  | [5] | [26] | [88]  | -1.62 | -1.54 | 1.14  | Ubiquitin-conjugating enzyme E2 35   |

**Note:**

<sup>a</sup>Assigned spot number (S2-S164) for the 80 differential proteins in 2-D DIGE gels of cassava

root proteins as indicated in Fig. 3.

<sup>b, c</sup>The experimental (b) and theoretical (c) values for the mass (kDa) and *pI* of identified proteins. The theoretical values were retrieved from the protein database, and the experimental values were produced by ImageMaster.

<sup>d</sup>The number of matched peptides (MP) and total searched peptides (TP) for the proteins identified for MS. The number of matched peptides for MS/MS was presented in square bracket.

<sup>e</sup>Sequence coverage (SC) of the identified proteins by MS and [MS/MS].

<sup>f</sup>Mascot searched scores (M.S.) against cassava genome for MS and [MS/MS] searched results.

<sup>g</sup>The average changed ratios of the target protein spots in 2-D DIGE gels of the stage 3 (S3), 4 (S4) and 5 (S5) of cassava roots.

**Supplementary Table S2-continued** Detai information for the hierarchical cluster of the average changed abundance ratios of the identified protein spots on 2-D DIGE gels in Figure 5C was also highlighted. The log values for the induced or reduced relative abundance volume ratios were indicated in red or green, respectively.

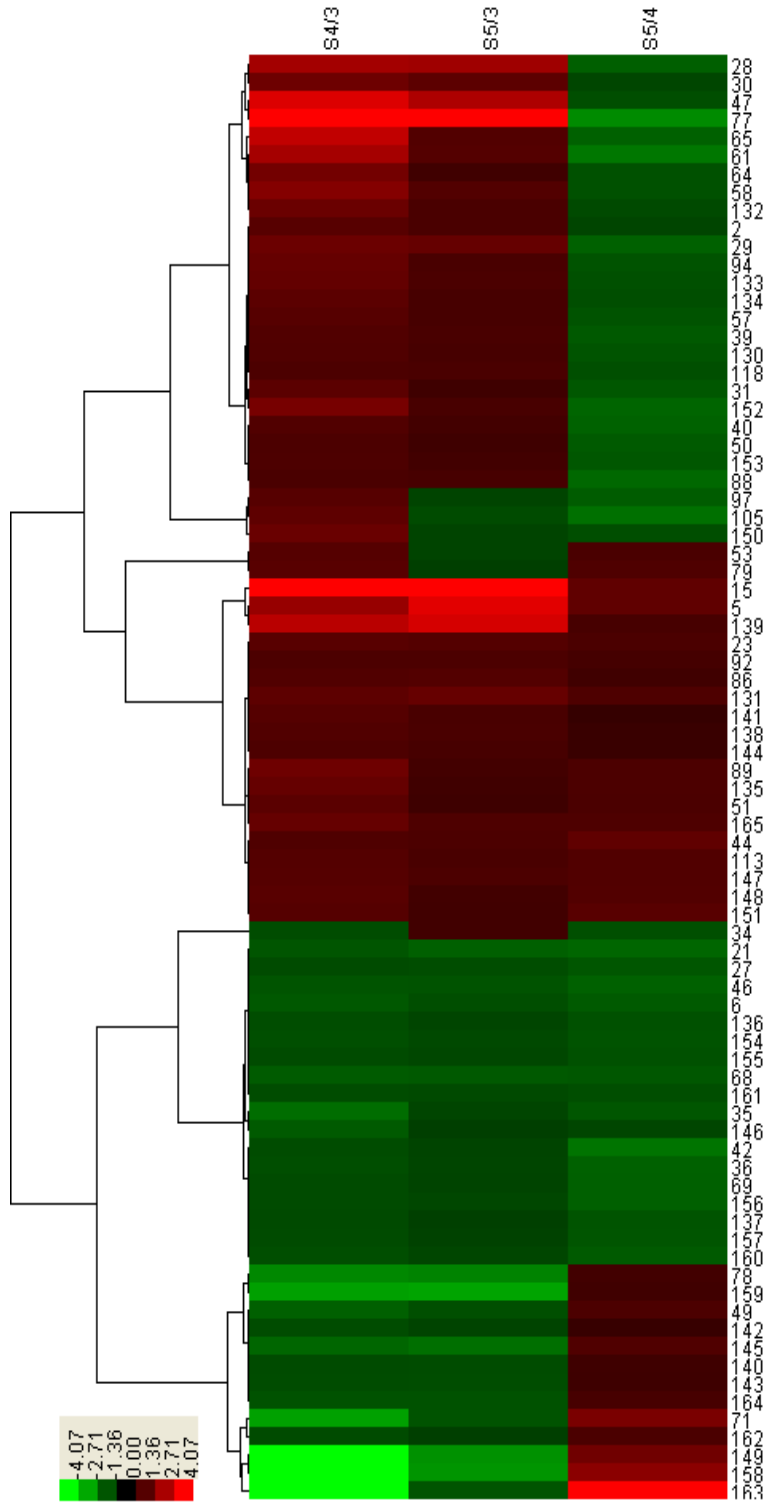

**Supplementary Table S3.** Primers used for RT and Q-PCR analysis.

**14-3-3 protein** (Spots 34, 35, 36):

5'-GAGCAAGATTTGTGATGGGATC-3'

5'-TAGGAGCGAGATCAGCAAGG-3'

**Ascorbate peroxidase APX2** (Spots 51, 52, 73):

5'-GTTTCATCGCTGAGAAAGGC-3'

5'-ATCTCAACGGCAACAACACC-3'

**Superoxide dismutase** (Spots 66, 72, 104, 106):

5'-GGCTGAAGCTGTTCTTACCA-3'

5'-TGATCTTTGCCAGAAGGGTT-3'

**Initiation factor eIF5-A:**

5'-GATATTGTTCC TTCATCCCACA-3'

5'-CCTCAGCAAACCCATCTTTA-3'

**S-adenosylmethionine synthetase 4:**

5'-AAGACGCAGGTTTAGGTGGAAGAT-3'

5'-GATGGGTTTAGGTGGAAGAT-3'

**Malate dehydrogenase** (Spots 79, 114):

5'-CAAATGCGTTGATTCTAAGGG-3'

5'-GCGTGATTGACATGTGGGTAC-3'

**UDP-D-apiose/UDP-D-xylose synthase:**

5'-TCTGGCGGCTATTTG TACTC-3'

5'-TCTCTGCTTCTCAATGGGTC-3'

**Enolase** (Spots 83, 87, 88, 116):

5'-TGCTGGAAATAAACTTGCTATG-3'

5'-AACCACCTTCATCACCAACAT-3'

**ADP-glucose pyrophosphorylase small subunit** (Spots 20, 91):

5'-TTCATTCTTG TAGCCACCCA-3'

5'-ATTATTCTTG GAGGCGGTGC-3'

**Starch phosphorylase 1 precursor:**

5'-GAGGTTGCTGAAGATTGGCT-3'

5'- CCCAGCATTGAAAGCAGACA-3'

**18sRNA:** 5'- CCTGAGAAACGGCTACCAT -3'

5'- CGTGTCAGGATTGGGTAAT -3'

**Primers specific for the vector:**

S1300F, 5'-GCCTTGCTTCCTATTATATCTTCC-3';

S1300R, CCCATCTCATAAATAACGTCATG.

**Primers specific for 14-3-3 gene in the transgenic plants for Southern blotting:**

P1300-1433F, 5'- TGCTGATCTCGCTCCTACCCAC -3';

P1300-1433R, 5'- AACCACCAGATGATGGCATCTACTC -3'.
